# Supplementary material for: Epigenetic regulator UHRF1 orchestrates proinflammatory gene expression in rheumatoid arthritis in a suppressive manner
Source: J Clin Invest. 2022 Jun 1;132(11):e150533. doi: 10.1172/JCI150533 (PMC9151705; doi:10.1172/JCI150533)
Supplement: Supplemental table 1 [file jci-132-150533-s155.xlsx]

## Sheet: Microarray-UP
ProbeID	Gene Symbol	GenbankID	p-value			Ratio			Data
			t-test Ctrl-L_vs_Ctrl-P	t-test CAIA_vs_Ctrl-P	t-test CAIA_vs_Ctrl-L	Ctrl-L_Av/Ctrl-P_Av	CAIA_Av/Ctrl-P_Av	CAIA_Av/Ctrl-L_Av	Ctrl-P1	Ctrl-P2	Ctrl-P3	Ctrl-P4	Ctrl-L1	Ctrl-L2	Ctrl-L3	Ctrl-L4	CAIA1	CAIA2	CAIA3	CAIA4
1419728_at	Cxcl5	NM_009141	0.973049	1.03568e-07	1.03416e-07	0.987915	229.665	232.474	5.8	11.2	12.7	3.4	10.4	10.8	8.5	3	2016.2	1982.7	1730.6	1872.4
1450297_at	Il6	NM_031168	0.215154	0.000292684	0.000287953	0.668712	112.733	168.583	8.6	11.8	5.1	7.1	3.4	4.6	9.4	4.4	1227.1	814.7	975.7	657.6
1427381_at	Irg1	L38281	0.87271	0.00737643	0.00735547	0.934211	106.75	114.268	2.2	1.1	1	3.3	3.2	1.3	1.8	0.8	318	257.3	110	126
1449399_a_at	Il1b	BC011437	0.0102722	8.68973e-05	8.37208e-05	0.711741	44.9347	63.1335	38.4	44.1	32.8	36.3	28.4	22.1	30.5	26.9	2084.1	1931.1	1376.6	1420.3
1449984_at	Cxcl2	NM_009140	0.13027	0.000278391	0.000250304	0.491345	30.7071	62.4959	33.6	18.8	11.4	11.3	8.4	13.4	8.7	6.4	733.9	588	605.8	378.4
1419209_at	Cxcl1	NM_008176	0.0222708	0.00738382	0.00696133	0.557377	34.6934	62.244	46.7	41.3	39.9	36.8	27.2	28	30.3	6.3	1970.1	955.3	2082.5	706.1
1422029_at	Ccl20	AF099052	0.0579426	0.00555184	0.0053771	0.71134	43.1649	60.6812	2.1	3.1	2.1	2.4	2.2	1.3	1.7	1.7	171.1	72.9	109.9	64.8
1422317_a_at	Il1rl1	NM_010743	0.417122	6.87752e-05	6.45518e-05	0.643006	33.5261	52.1396	16	4.7	7.5	19.7	2.8	9.5	16.6	1.9	476.4	418.6	422.7	288.2
1438148_at	Cxcl3	BB829808	0.13528	0.000262953	0.00024474	0.617886	30.8984	50.0066	4.9	9.2	4.6	5.9	4.1	1.3	5.2	4.6	259.3	159.7	155.3	185.8
1445268_at	---	AW550459	0.397569	0.000527678	0.000511736	0.795455	39.0909	49.1429	1.5	3.3	2.4	1.6	2.2	1	1.8	2	58.2	107	71.7	107.1
1423466_at	Ccr7	BB204380	0.0699934	0.000143824	0.000109676	0.418605	15.314	36.5833	1.8	3.7	1.5	1.6	0.3	0.8	1.3	1.2	26.1	43	31	31.6
1448201_at	Sfrp2	NM_009144	0.638618	4.38864e-07	4.37973e-07	1.05132	30.4533	28.9669	186.5	260	228.2	173	237.3	237.5	218.6	197.8	5669.6	6825.6	6521.8	6798.3
1424010_at	Mfap4	BC022666	7.81283e-05	3.42535e-05	4.08899e-05	7.43643	211.275	28.4108	3.1	38.9	5.9	10.3	111.9	104.9	120.8	95.2	2644	3857.9	2707.1	3087.2
1418945_at	Mmp3	NM_010809	0.0153808	2.15605e-06	2.39966e-06	1.73653	48.6248	28.0012	108.7	137.2	134	156.4	223	193.2	314	201.1	5525	7177.9	6465.2	6909.4
1460282_at	Trem1	NM_021406	0.222111	0.000481969	0.000390217	0.520833	14.1875	27.24	8.5	2.5	4.6	3.6	0.9	3.7	4.9	0.5	71.7	80.4	41.2	79.1
1448025_at	LOC100038947 /// Sirpb1a /// Sirpb1b	AI662854	0.564389	1.94701e-06	1.86342e-06	0.870555	23.6209	27.1332	39.8	38.5	43.6	18.7	31.2	32.2	17.5	41.5	894.9	901.3	713.2	811.7
1440564_at	Prokr2	BB023274	0.688796	0.000309491	0.000293552	0.81893	21.9712	26.8291	8.2	10.1	1.4	4.6	1.4	7.7	8.3	2.5	181.1	133.9	103.3	115.6
1448377_at	Slpi	NM_011414	0.802272	1.5613e-08	1.65405e-08	1.06059	28.2626	26.6479	70.4	79.5	124.3	131.8	155.4	102.3	70.2	102.7	2829.4	2823.6	2758.2	3063.4
1457108_at	---	BM240069	0.0337469	0.000579143	0.000505268	0.619355	16.2829	26.2902	30.4	34.5	21.9	21.7	15.8	12.1	21.8	17.5	552.4	542.7	369.4	302.2
1419604_at	Zbp1	NM_021394	0.200508	0.000194953	0.000164528	0.642202	15.7569	24.5357	4.1	3.6	9.1	5	4.2	4.4	3.3	2.1	114.7	81.3	77.6	69.9
1451796_s_at	Hdc	AF109137	0.497887	1.26598e-05	1.75955e-05	1.65652	40.4174	24.399	4.9	7	7.9	3.2	24.9	4.6	4.1	4.5	266.1	255.2	190.5	217.8
1450185_a_at	Kcnj15	NM_019664	0.360034	1.70291e-05	1.75139e-05	1.24164	28.6877	23.1048	12.9	17.8	5.2	17.9	17.6	12.7	18.7	17.8	313.8	418.6	362.3	448.7
1418806_at	Csf3r	NM_007782	0.598331	2.05071e-05	1.98704e-05	0.930144	20.8368	22.4017	67.2	56.7	42.2	42.9	52.1	52	40.8	49.5	1284.9	1098	864.1	1107.9
1458683_at	Sirpb1a	BB224524	0.919676	1.6409e-05	1.54883e-05	0.974937	21.7043	22.2622	25.4	27.2	7	20.2	19.8	21.5	20.9	15.6	492.7	469.4	343.4	426.5
1424882_a_at	Nt5dc2	BC011230	0.834556	2.74587e-07	3.06438e-07	1.05474	23.0706	21.8733	46.8	53.3	66	86	59.1	59.8	42.6	104.4	1538.7	1334.3	1386.8	1556.3
1435354_at	Kcnj15	BB533892	0.386418	8.43546e-06	9.23167e-06	1.24461	26.7371	21.4823	36.3	36.2	22.4	25.7	34.6	26.9	30.5	58.1	657.4	848.3	798.7	920.1
1422252_a_at	Cdc25c	NM_009860	0.137546	7.09507e-05	6.04497e-05	0.625	13.3173	21.3077	2.9	1.8	3.5	2.2	0.8	2.7	1.1	1.9	41.2	36.5	25.5	35.3
1418612_at	Slfn1	NM_011407	0.409641	0.000205914	0.000185395	0.615809	13.0882	21.2537	12.2	9.3	9.1	23.8	3.3	7.6	0.6	22	220.6	177.8	123.4	190.2
1438841_s_at	Arg2	AV002218	0.797418	9.28824e-05	0.00010401	1.20408	24.4694	20.322	0.3	4.7	4.1	0.7	5.8	0.4	0.4	5.2	77.1	55.8	58.8	48.1
1448872_at	Reg3g	NM_011260	0.174024	0.00740376	0.00547514	0.493333	9.62667	19.5135	3.4	0.7	1.4	2	1.3	1.3	0.4	0.7	29.1	10.2	18.3	14.6
1452968_at	Cthrc1	AK003674	0.0187267	4.5147e-06	5.03356e-06	1.44645	28.1414	19.4554	213.1	257.2	192.5	232.7	279.9	291.1	404.1	320.2	5222.5	7074.6	6333	6570.5
1420804_s_at	Clec4d	NM_010819	0.150642	7.36942e-07	7.93975e-07	1.32279	25.066	18.9493	53.5	31.9	60	38	66.4	69.1	64.7	42.4	1234.8	1209	1003	1150.3
1421228_at	Ccl7	AF128193	0.750383	0.000314958	0.000311664	0.93423	17.358	18.58	41.3	25.7	32.4	34.4	34	15.7	43.5	31.8	775	603	516.3	428.2
1416676_at	Kng1	NM_023125	0.0068095	4.64565e-07	1.63554e-07	0.449723	8.09225	17.9938	69.2	57.2	56.2	34.2	26.4	23.3	26.2	21.6	414.9	462.5	409.9	467.1
1419083_at	Tnfsf11	NM_011613	0.508592	1.83526e-07	1.31024e-07	0.855923	15.3533	17.9377	36.2	18.1	21.1	18.3	14.2	24.2	20.3	21.5	349.1	376.6	331.3	381.6
1418069_at	Apoc2	NM_009695	0.570056	2.2993e-05	2.18296e-05	0.907229	16.1892	17.8446	25.3	16	25.5	16.2	22	16	15.6	21.7	405.6	322.4	276.7	339
1418424_at	Tnfaip6	NM_009398	0.736567	4.1516e-06	4.18702e-06	0.966165	16.6023	17.1837	34.8	31.2	35.4	31.6	38.1	24.1	34.9	31.4	545.4	610.6	462.1	590
1424825_a_at	Glycam1	M93428	0.218064	0.000386232	0.000450919	1.70492	29.1311	17.0865	0.6	1.3	2.7	1.5	3.4	1.4	4	1.6	33.4	53.8	34.7	55.8
1443928_at	Cytip	AI462064	0.0157248	5.48275e-05	2.78343e-05	0.376248	6.3523	16.8833	22.7	16.2	29.7	31.6	8	16.6	11.3	1.8	150	197.3	143	146.2
1456344_at	Tnc	BB003393	0.268166	9.9325e-06	4.09942e-06	0.624526	10.1588	16.2664	64.6	115.6	175.7	39.6	74.4	55.7	61.6	55.3	860.2	1023.8	1149.3	984.5
1456073_s_at	Panx3	AV220875	0.133717	0.00057547	0.000472765	0.649273	10.4867	16.1515	19.5	25.2	38.2	34	29.8	15	10.6	20.5	225.5	261.7	322.4	416.3
1431688_at	LOC73899	AK014661	0.00338946	0.000517528	0.000226566	0.323887	5.11943	15.8063	15	12.5	12.9	9	2.4	2.6	7.8	3.2	81.3	65.7	45.2	60.7
1452595_at	Adamts4	BB443585	0.715301	1.1065e-06	1.20349e-06	1.09595	16.7324	15.2676	26.1	13.5	20.5	13.9	23.4	10.2	26.5	21	341.7	307.2	272	317.3
1437199_at	Dusp5	BB442784	0.769741	1.15556e-05	2.73639e-05	1.24196	18.8545	15.1812	20.1	8.9	12.4	17.7	6.9	8.2	5.8	52.5	312.1	302	276.6	223.6
1419627_s_at	Clec4n	NM_020001	0.00281519	6.9565e-06	7.75232e-06	1.3417	20.0199	14.9213	74.3	63.8	67.5	61.3	100.3	88.8	83.9	85.1	1264.4	1597.1	1214.3	1267.5
1454713_s_at	Hdc	BG072171	0.490312	0.00231495	0.00216187	0.84955	12.6622	14.9046	36.7	24.3	33	17	28	30.1	14.2	22	494.3	414.4	207.9	288.9
1419684_at	Ccl8	NM_021443	0.0558507	3.64839e-05	4.02702e-05	1.33418	19.4669	14.591	160.4	234.6	174.4	259.2	266.7	263.2	326.7	248.9	4551.2	4725.7	3382.5	3470.9
1450586_at	Bdkrb1	NM_007539	0.536201	6.36141e-06	5.5794e-06	0.838938	11.7646	14.0232	12.5	21.1	8.6	14.3	7	10.8	11.6	18	172	186.4	167.8	138.5
1459304_at	---	BB449560	0.483334	0.00274251	0.000688117	0.458904	6.42466	14	1.9	0.7	10.9	1.1	0.6	0.8	4.8	0.5	15.9	22.5	23.7	31.7
1440902_at	Ermn	AI854460	0.0209476	0.566101	0.0040894	0.0564972	0.79096	14	2.2	3.2	8.3	4	0.1	0.3	0.3	0.3	3.4	4.5	4.6	1.5
1423294_at	Mest	AW555393	0.961398	0.000258688	0.000261734	1.00782	14.0467	13.9377	113.7	126	133.2	87.6	113.7	158.4	98.3	93.7	1115.5	1879.9	1501	1972.1
1437695_at	Prokr2	BB332991	0.525669	0.000444051	0.000430729	0.825503	11.3893	13.7967	9	6.1	8.2	6.5	7.9	5	10	1.7	112.6	87.1	58.4	81.3
1460187_at	Sfrp1	BI658627	0.981059	0.000141588	0.000141688	1.00286	13.7907	13.7513	73.7	94.8	76.7	104	72	106	84.4	87.8	1443.6	1145.4	861	1365.7
1420331_at	Clec4e	NM_019948	0.572011	0.000189765	0.000195045	0.725806	9.91935	13.6667	9.8	4.1	12.1	5	14.2	0.9	2.2	5.2	57.6	98.1	77.6	74.2
1417318_at	Dbc1	AB060589	0.867331	5.92141e-05	6.30016e-05	0.896552	12.1429	13.544	0.9	10	6.2	3.2	0.4	7.2	9.6	1	54.8	77.3	59.3	55.1
1451206_s_at	Cytip	BC007144	2.97128e-05	1.92088e-05	9.74889e-06	0.423077	5.63968	13.3301	109.7	110.6	121.6	102.7	54.4	50	35.1	48.6	620.1	748.1	580.9	558.3
1419496_at	Slco1a6	NM_023718	0.0365944	0.610389	0.00184331	0.0599078	0.797235	13.3077	2.5	8.3	9.1	1.8	0.4	0.3	0.2	0.4	3.9	4.2	2.8	6.4
1416594_at	Sfrp1	BI658627	0.620748	1.37936e-05	1.27603e-05	1.12026	14.8328	13.2405	38.4	72	23.9	66.1	55.4	54.6	52.9	61.6	838.3	753.9	593.5	786.8
1454830_at	Fbn2	AV010392	0.241321	4.39067e-05	3.78444e-05	0.799296	10.5312	13.1756	68.4	44.3	45.2	40.9	50.8	42.6	31.8	33.7	403.3	616.8	521.6	551.9
1425951_a_at	Clec4n	AF240358	0.613551	1.12446e-05	1.10998e-05	0.976636	12.7866	13.0925	29.6	32.6	34.8	31.4	29.3	32.1	30.6	33.4	406.2	466.9	333.6	435.1
1415832_at	Agtr2	NM_007429	0.120028	7.7458e-05	9.83502e-05	1.6901	22.1118	13.0832	9.3	10.1	7.7	4.2	18.7	6	15.2	13	168.9	202.4	125.7	195.1
1418847_at	Arg2	NM_009705	0.379762	7.74245e-06	8.03069e-06	1.45122	18.8984	13.0224	7.1	12.2	1.4	3.9	13.4	8.2	4.8	9.3	134.9	119.5	110.7	99.8
1442140_at	Tnn	AI591634	0.00416572	0.000364763	0.000409774	1.35542	17.6343	13.0103	80.2	86	63.1	72.6	95	98.3	108.8	107.1	870.2	1273	1503.9	1676.7
1421712_at	Sele	NM_011345	0.0869927	0.00109779	0.000949859	0.753112	9.77905	12.9848	26.9	28	19.3	22.2	19.9	23.1	15.8	13.8	129.6	282.9	250.7	279.5
1442134_at	Prr11	BB815146	0.0112611	0.000284417	6.52627e-05	0.319392	4.10076	12.8393	19.3	11.7	12.7	8.9	3.7	7.3	1.8	4	41.2	56	53.3	65.2
1448891_at	Fcrls	BC016551	0.709592	0.00039417	0.000377196	0.942938	12.0873	12.8188	100.4	70.3	53.9	92.6	81.5	83.3	70.9	63.4	1319.7	916	801.2	797.2
1450322_s_at	Slfn3 /// Slfn4	NM_011409	0.14097	0.00612029	0.003769	0.499184	6.31158	12.6438	22.9	14.5	19	4.9	8.4	13.1	1.7	7.4	150.9	81	60.9	94.1
1421172_at	Adam12	NM_007400	0.867228	6.80079e-06	7.07206e-06	1.0156	12.8241	12.6271	115.4	116.5	109.5	107.2	116.7	140.4	101.1	97.4	1168.5	1539.8	1481.2	1563.4
1422606_at	C1qtnf3	NM_030888	0.239999	0.00105936	0.00125574	1.46351	18.2655	12.4806	43.5	81.8	70.8	61.5	83.7	72.1	157.3	63.9	929.4	1096.4	948.8	1730.6
1432860_at	Panx3	AK014690	0.295471	0.00170657	0.000753485	0.483589	6.00875	12.4253	2.8	4.8	19.4	18.7	3.5	13.4	2.8	2.4	49.5	55.5	90.5	79.1
1440201_at	Slc8a1	BB313689	0.5364	7.21116e-05	6.95284e-05	0.833333	10.35	12.42	5.1	6.7	4.1	8.1	1.3	5.9	6.7	6.1	55.3	58	55.8	79.3
1455965_at	Adamts4	BG064671	0.0363793	2.01645e-05	2.60818e-05	1.87654	23.2006	12.3635	11.4	6	4.8	10.2	16.2	9.2	16.3	19.1	183.6	170.4	166.5	231.2
1418993_s_at	F10	NM_007972	0.246342	2.26838e-05	1.9411e-05	0.748031	9.1811	12.2737	2.9	4.2	2.2	3.4	1.4	2.1	3.6	2.4	25.6	27.1	28.5	35.4
1449169_at	Has2	NM_008216	0.311796	5.42619e-06	4.86269e-06	0.85782	10.4645	12.1989	45.4	28.7	40	33.6	38.2	23.5	32	33	413.7	436.6	352.3	343
1428866_at	2810037O22Rik	AU067779	0.0783136	3.56391e-05	5.87614e-05	3.45946	41.9865	12.1367	1.6	0.6	4.8	0.4	1.1	9.4	6.3	8.8	86.7	92	63.7	68.3
1420330_at	Clec4e	NM_019948	0.0510174	3.78042e-05	4.54976e-05	1.51391	18.3077	12.093	13.2	13.4	13.3	21.2	28.6	22.7	24.8	16.4	300	318.5	208.2	291.9
1442101_at	Elfn1	BB279531	0.501327	0.00237264	0.00209809	0.780488	9.42683	12.0781	2.1	1	3.1	2	2	2.7	1	0.7	19.7	28.8	13.8	15
1421734_at	Cxcr2	NM_009909	0.658516	0.000386675	0.000363037	0.848117	10.2187	12.0487	20.6	27.5	26	8.2	27.8	3.4	19.9	18.7	261	244.1	145.7	190.2
1451944_a_at	Tnfsf11	AB032771	0.0314126	0.000430195	0.000275921	0.523694	6.30377	12.0371	24	24.8	16	17.5	13.9	16.6	7.7	4.9	111.1	115.8	176	115.9
1419943_s_at	Ccnb1	AU015121	0.168872	0.000371737	0.000542989	2.55	30.6313	12.0123	1.3	9.1	4.2	1.4	2.8	6	18.1	13.9	88.1	103.9	136.8	161.3
1421171_at	Adam12	NM_007400	0.268354	1.4899e-05	1.27232e-05	0.849401	10.0775	11.8642	39.8	50.5	40.1	28.3	31.6	34.2	30.3	38.7	320.5	445	400.3	433.5
1435510_at	Ppm1h	BB283101	0.376926	6.03957e-05	9.22494e-06	0.592845	7.03066	11.8592	32.4	6.4	9.1	10.8	7.7	7.9	14	5.2	103.5	85	107.9	116.3
1430802_at	H2-Q8	AK013097	0.308971	0.00134613	0.00101586	0.645892	7.64023	11.8289	13.3	5.3	11.3	5.4	2.9	4.1	11.4	4.4	96.4	49.5	65.7	58.1
1427102_at	Slfn4	AF099975	0.332535	0.00476035	0.00435956	0.817802	9.6214	11.7649	139.3	124.3	118.7	96.3	149.1	97.3	60.9	84.1	1830	934.1	753.5	1087.2
1425225_at	Fcgr4	BC027310	0.768142	0.000250089	0.00027393	1.09519	12.4503	11.3682	26	31.6	12.5	23.4	42	27.1	16.8	16.5	385.8	295.6	254.4	228.3
1450291_s_at	Ms4a4c	NM_022429	0.19787	1.18536e-05	7.64157e-06	0.713262	8.0693	11.3132	12.8	25.7	28.1	17.1	12.9	13.9	11.9	21	196.5	170.6	145.2	163.1
1445908_at	Eif2b5	BG067005	0.0398432	0.458098	0.00142735	0.118896	1.31635	11.0714	2.3	21.6	12.6	10.6	1.4	1.4	1.9	0.9	10.5	18.9	11.9	20.7
1425416_s_at	Psrc1	BC008994	0.235609	0.00951919	0.00506485	0.515152	5.67273	11.0118	10.2	2.5	15.6	4.7	3.1	5.2	2.8	5.9	23.9	46.9	72	44.4
1440681_at	Chrna7	BM115621	0.886451	0.000268655	0.000249062	0.955882	10.5037	10.9885	22.8	9.9	8.1	13.6	7.1	15.5	17.8	11.6	101.4	146	141.1	182.9
1422831_at	Fbn2	NM_010181	0.0902401	6.00279e-05	5.23785e-05	0.804569	8.80426	10.9428	84.2	76.1	93.9	69.7	81.4	61.9	63.7	53.6	538.8	800.9	699.3	812.7
1428034_a_at	Tnfrsf9	BC028507	0.66674	0.000122308	0.000217036	1.29545	14.1705	10.9386	2.8	1.5	2.5	2	1.1	7	1.1	2.2	26.2	32.2	40.1	26.2
1443476_at	Pax1	BB229078	0.112085	0.00366905	0.00177414	0.489362	5.30851	10.8478	6.6	2	3.3	6.9	1.2	2.2	3.3	2.5	29.3	30.5	27.6	12.4
1433039_at	4930555B11Rik	AK016127	0.264658	0.00344034	0.00280236	0.717391	7.76087	10.8182	1.2	1.3	0.6	1.5	1.3	0.5	0.6	0.9	9.6	10.5	11.5	4.1
1460227_at	Timp1	BC008107	0.0406977	4.0634e-08	1.95638e-08	0.763746	8.15598	10.6789	938.9	749.8	815	1110.2	706.2	672.4	740.3	641.2	7380.2	6950.9	7787.2	7356.6
1435697_a_at	Cytip	BB503614	0.000188487	3.53486e-05	1.89528e-05	0.514157	5.48059	10.6594	297.7	245.1	292.5	249	156	151.2	127.7	122.6	1482.7	1785.3	1417.4	1257.2
1448710_at	Cxcr4	D87747	0.0244085	5.65334e-05	3.97206e-05	0.675087	7.18541	10.6437	152.3	154.1	199.3	123.7	122.9	112.6	95.8	93.6	1341.6	1243.4	977.3	960.2
1438439_at	Gpr171	BB229616	0.179827	4.55762e-05	3.62414e-05	0.65587	6.85628	10.4537	12	15.7	7.6	14.1	3.5	9.7	5.8	13.4	95.2	86.9	65.2	91.4
1438518_at	9930021J03Rik	BE995736	0.229098	0.0372797	0.00254204	0.291457	3.01759	10.3534	3.5	6.6	25.5	4.2	1.9	2.4	4.8	2.5	21	21.7	33.6	43.8
1419004_s_at	Bcl2a1a /// Bcl2a1b /// Bcl2a1d	L16462	0.321513	1.19421e-06	9.01535e-07	0.809869	8.35174	10.3125	60.2	33.2	60.3	67.2	32.8	49.3	59.9	36.9	499.9	472.5	465.2	407.3
1448881_at	Hp	NM_017370	0.386644	1.18581e-07	1.78574e-07	1.12432	11.4847	10.2147	625	616.3	694.1	619.2	646.5	966.2	615.5	644	7992.5	7263.1	7182.1	6901
1424561_at	Ece2	AF396699	0.888729	6.20663e-05	2.27075e-05	0.928889	9.47111	10.1962	13.4	1.4	3.7	4	6	3.3	5.3	6.3	49.4	43.8	60.5	59.4
1450783_at	Ifit1	NM_008331	0.0640437	0.00271173	0.0021942	0.736842	7.48286	10.1553	78.8	69.5	107.3	71.2	60.3	61	50.9	68.6	574	562.7	397.6	911.1
1416572_at	Mmp14	NM_008608	0.199858	4.21649e-05	4.50018e-05	1.12066	11.374	10.1493	283.5	281.9	296.9	221.7	275.3	324.2	335.5	279.8	2477.6	3315.5	2846.1	3690.2
1438796_at	Nr4a3	BE692107	0.407478	0.00031483	0.000263761	0.833902	8.41328	10.089	137.9	83.5	96.5	63.2	90.3	79.5	91.7	56.3	745	1044	825.6	591.7
1428136_at	Sfrp1	AK008943	0.174619	5.3512e-05	5.68747e-05	1.10205	11.1016	10.0735	224.8	197.3	201	185.3	195.6	244.3	217.9	233.1	2841.9	2014.4	1999.7	2118.5
1416295_a_at	Il2rg	L20048	0.0375235	8.38752e-07	6.21921e-07	0.768375	7.70599	10.0289	98	107	88.7	75	78.6	62.4	77.5	64.8	635.9	747.9	692.9	764.5
1449976_a_at	Gpr35	NM_022320	0.89384	8.11581e-05	8.65618e-05	0.976296	9.71556	9.95144	14.8	17.2	18.7	16.8	16.5	18.6	8.9	21.9	178	195.1	122.3	160.4
1418919_at	Sgol1	NM_028232	0.721815	2.9271e-06	6.85782e-06	1.15842	11.4752	9.90598	10	8.4	3.7	8.2	11.2	3	5.1	15.8	82.7	90	77	98
1417795_at	Chl1	NM_007697	0.183912	2.76409e-06	3.65735e-06	1.3205	13.0789	9.90452	32.5	28.9	20.5	22	40.3	24.3	28.3	44.3	325.9	343.3	301.3	388.4
1419532_at	Il1r2	NM_010555	0.312429	7.34598e-06	8.69923e-06	1.24029	11.9648	9.64676	76.8	53.8	51.1	39.7	94	55.8	70.6	54.2	703.4	741.4	548.6	655.6
1415857_at	Emb	BG064842	0.639194	9.91549e-09	7.03908e-09	1.03603	9.98278	9.63557	350	296.1	304.5	245.5	306.6	309.5	321.6	301.5	3111.7	3050.8	2916.1	2861.8
1421952_at	Capn6	AI747133	0.990855	0.000462049	0.000482897	0.997642	9.60967	9.63239	18.7	20.9	19.2	26	24	13.2	16.9	30.5	153.3	172	217.7	271.9
1442091_at	---	BG070382	0.191262	0.0540567	0.00947011	0.3125	2.99219	9.575	4.4	1	0.7	6.7	0.8	0.6	0.4	2.2	7.4	7.7	6.9	16.3
1418547_at	Tfpi2	NM_009364	0.352357	6.10817e-07	5.78593e-07	1.11554	10.6749	9.56934	36.3	35.3	31.8	49.8	47.4	41.3	43.8	38.4	444.7	411.4	364.6	414.7
1416871_at	Adam8	NM_007403	0.6878	1.69328e-06	1.4821e-06	0.941587	8.93243	9.48657	64.3	40.9	70	54.2	67.8	51.3	50.5	46.4	544.2	539.7	441.6	523.6
1418930_at	Cxcl10	NM_021274	0.0264827	0.000343492	0.000178167	0.5688	5.392	9.47961	29.4	43.6	22.7	29.3	18.5	13.9	18.5	20.2	155	147.2	148.5	223.3
1457770_at	Slc39a14	BB022806	0.585925	5.77556e-09	8.07778e-10	0.912536	8.5691	9.39042	48.9	25.9	47.5	49.2	31.4	46.5	41.5	37.1	372.1	374.4	357.5	365.6
1424046_at	Bub1	AF002823	0.909153	3.14619e-07	6.67687e-07	1.02518	9.61511	9.37895	13.9	16.1	11.4	14.2	7.2	17.9	12.5	19.4	127.7	123.7	138.6	144.6
1420731_a_at	Csrp2	NM_007792	0.0792219	7.72854e-09	8.71671e-09	1.11353	10.4312	9.3677	299.6	301.4	344.7	319.2	365.4	369.8	361	312.3	3213.3	3241	3247.9	3492.2
1420671_x_at	Ms4a4c	NM_029499	0.102905	8.25027e-06	6.43159e-06	0.698281	6.53527	9.35908	45.8	45.1	29.3	48.5	43.4	24.6	29.3	20.5	317.8	278.7	240.9	265.1
1427076_at	Mpeg1	L20315	0.671797	1.62788e-05	1.52852e-05	0.963538	8.96765	9.307	316	318	399.5	280.2	334.9	300.8	330.1	300	3134	3067.8	2330.2	3248.8
1456557_at	Ccdc30	BB256666	0.823611	0.000174848	0.0002817	0.865385	8.03846	9.28889	4.5	0.9	2.3	2.7	0.3	1.5	1.1	6.1	16.7	25.6	18.1	23.2
1420380_at	Ccl2	AF065933	0.47351	0.000179288	0.000171209	0.876018	8.10457	9.25161	38	31.8	45	44.9	43	40.5	38.1	18.3	403.2	334.6	321.4	235.1
1416006_at	Mdk	M34328	0.848123	0.000767808	0.000778604	1.01715	9.40134	9.24283	126.6	102.3	116.4	103.7	110.8	128.1	124	93.8	806.3	1466.7	857.8	1090.4
1418678_at	Has2	NM_008216	0.211289	5.3014e-05	4.1013e-05	0.81	7.41394	9.15301	97.8	86.6	93	52.6	80.3	63.4	59.9	63.7	627.4	749.5	546.5	523.2
1421326_at	Csf2rb	NM_007780	0.881282	1.21127e-06	1.18406e-06	0.984034	9.00053	9.14657	52.4	52.5	37.8	45.2	43.9	55.5	40	45.5	464.2	444.6	382.1	400.3
1434798_at	Atp6v0d2	BB769890	0.52752	0.000175541	0.000161629	0.912815	8.34669	9.14391	106.2	91.7	79.6	64.3	69.9	96.6	67.1	78.4	548.8	619.6	838.7	845.8
1425548_a_at	Lst1	U72644	0.625437	1.84726e-05	1.8895e-05	1.06518	9.7305	9.13507	78.2	101.7	127.2	114.8	131.6	120.6	96.3	100.9	1145.4	1158.8	857.5	943.6
1416296_at	Il2rg	L20048	0.256188	5.5302e-07	4.00961e-07	0.859816	7.84334	9.12212	85.8	77.9	115	79.4	69.9	91.4	70.6	76	666.7	762.8	650.7	728.5
1420579_s_at	Cftr	NM_021050	0.048515	0.44812	0.0079729	0.150602	1.37349	9.12	4.3	0.2	6.8	5.3	0.2	1.1	0.8	0.4	9.2	5.7	3.1	4.8
1452815_at	P2ry10	AK020001	0.00196707	0.00010707	1.07323e-05	0.289837	2.63614	9.09524	20.1	14.5	20.7	24.4	6.2	9.2	6.9	0.8	53.9	60.4	47	48.8
1437057_at	Megf6	AI450376	0.256979	2.07102e-06	2.35811e-06	1.16809	10.5968	9.07195	73.8	54.9	50.9	54.8	73.6	54.5	81.9	63.8	572	670.8	561.9	679.2
1417130_s_at	Angptl4	NM_020581	0.512607	9.13536e-06	9.12269e-06	1.08784	9.86738	9.07065	301.9	235.5	209	182.6	283.7	266.9	218.7	241.3	2435.5	2216.9	1916.6	2597.8
1460469_at	Tnfrsf9	BM250782	0.302623	1.51441e-05	4.32051e-05	0.63602	5.75819	9.05347	23.1	16.4	19.8	20.1	6.8	6.2	31.4	6.1	95.5	109.8	124.5	127.4
1427994_at	Cd300lf /// LOC100047115	BM230330	0.658089	9.5982e-07	1.26438e-06	0.88437	7.96962	9.01163	65.9	34.8	62.4	41	72.2	46.1	24.5	37.7	396.5	433.2	366.3	430.6
1457042_at	AI256396	BB328287	0.103897	2.04526e-05	2.21644e-05	1.136	10.1823	8.9633	151.9	116.2	131.2	140.4	169.6	146.5	154	143	1139.6	1604.2	1276.8	1474.8
1460283_at	Mefv	NM_019453	0.0589091	2.1979e-05	1.47358e-05	0.732143	6.55153	8.94843	53.5	39.7	61.6	41.2	38.2	40.7	31.5	33.1	335.1	353.6	254.9	340.5
1440767_at	Defb41	BB787829	0.386324	0.0820501	0.00838124	0.342857	3.05714	8.91667	2.7	0.4	0.2	0.2	0.3	0.3	0.5	0.1	3.8	2	3.6	1.3
1421168_at	Abcg3	NM_030239	0.130255	0.000919182	0.000331209	0.521891	4.63923	8.88926	4	19.5	16.3	17.3	2.4	8.9	10.2	8.3	57.9	82.4	48.6	76
1437226_x_at	Marcksl1	AV110584	0.320879	2.4096e-06	2.44237e-06	1.10604	9.82478	8.88282	172.8	130.8	167.8	122.7	158.3	184.8	161.4	152.6	1454.3	1601.7	1253.8	1527.1
1424975_at	Siglec5	AF293371	0.226341	0.000900813	5.97041e-05	0.437768	3.88841	8.88235	1.6	5.9	4	11.8	3.6	1.4	0.2	5	25.7	24.1	17.8	23
1450160_at	Lif	AF065917	0.102376	0.037897	0.000108105	0.245136	2.1751	8.87302	11.1	2.3	10.4	1.9	0.8	1.6	1.8	2.1	12.6	11.1	14.9	17.3
1425649_at	Slc39a14	BC021530	0.0234139	4.88151e-06	3.44803e-06	0.744708	6.5724	8.82547	61.6	69.3	48.5	56.8	40.3	50.2	39.9	45.5	422.9	327.3	406.6	395.6
1424938_at	Steap1	AF297098	0.0756805	9.89653e-06	5.70238e-06	0.68038	5.96097	8.76124	16	26.8	22.6	29.4	12.9	12.5	19.8	19.3	158.1	145.2	119	142.8
1440245_at	Ccdc88b	AW208904	0.556328	9.73435e-07	6.59417e-07	0.871036	7.59197	8.71602	17.5	10.6	10	9.2	8.4	12.9	12.9	7	98.1	85.6	83.2	92.2
1441706_at	Dscaml1	BB239540	0.527998	0.000970899	0.000206005	0.627119	5.42373	8.64865	3.6	0.5	1.3	0.5	1.9	0.4	1.1	0.3	6.3	7.2	10	8.5
1450298_at	Tnfsf14	NM_019418	0.713412	0.000149617	0.000491221	1.46018	12.5841	8.61818	1	2.2	7.5	0.6	13	0.5	1	2	44	34.9	26.8	36.5
1443253_at	---	BI076661	0.646997	1.19453e-06	1.27977e-06	1.04669	9.01394	8.61185	38.1	30.7	40.6	34.1	38.1	33.6	45	33.5	315.7	322.9	362.6	292.3
1455948_x_at	Matn3	AV009181	0.59855	0.000221471	0.000181513	0.874269	7.50292	8.58194	4.4	9	8.4	12.4	6.1	8.7	9.7	5.4	54.9	63.4	54.5	83.8
1432032_a_at	Artn	AK015393	0.807694	0.00477011	0.00251118	0.82623	7.08197	8.57143	3.6	22.3	3.3	1.3	5.7	6	2.6	10.9	38.7	36.8	68.1	72.4
1455899_x_at	Socs3	BB241535	0.0200167	0.000669953	0.000453531	0.681752	5.83557	8.55966	464.1	400.1	530.8	328.5	296.7	305.5	292.9	279.9	2270.5	3220.6	1747.9	2818.6
1439055_at	Gm15698	AU022548	0.572834	0.00613157	0.00526917	0.788732	6.73239	8.53571	1	2.5	2.5	1.1	2.8	0.8	1	1	12	5.1	15.9	14.8
1427035_at	Slc39a14	BB399837	0.242213	1.13673e-07	8.06147e-08	0.910205	7.75786	8.5232	386.1	327.2	443.2	344.7	344.3	332.6	342.1	347.4	3111.7	2766.8	2988.4	2779.2
1422134_at	Fosb	NM_008036	0.0111968	0.00306772	0.00160338	0.539045	4.58635	8.50828	61.8	49.3	70.8	42.2	31.3	25.7	38.9	24.9	195.1	329.5	327.7	175.5
1449991_at	Cd244	NM_018729	0.0126092	1.14173e-05	2.50998e-06	0.433925	3.6785	8.47727	12.5	14.5	15.4	8.3	2.2	4.8	6.9	8.1	51	48.9	44.4	42.2
1448291_at	Mmp9	NM_013599	0.0587492	0.000173803	0.000208962	1.29806	10.9991	8.47354	406.5	319	419.5	352.7	466.8	500.7	387.4	589.2	3125.1	3570.9	4846	4931.4
1455587_at	Fam167b	AW124853	0.182769	1.91256e-06	8.71094e-07	0.738294	6.25	8.46546	39.7	19.9	34.3	25.7	26.2	25.2	22.8	14.1	169.2	180.2	195.2	202.9
1447284_at	Trem1	BB784999	0.51615	0.000380538	0.000415935	1.12562	9.52011	8.45768	47.1	36.4	28.8	29.4	52.7	37.1	40.3	29.4	417.4	399.2	245.3	287.1
1417821_at	D17H6S56E-5	NM_033075	0.0725664	2.88667e-05	2.00659e-05	0.771505	6.50931	8.43715	123.2	140.9	134.5	85	89.7	99.6	92.3	91.5	691.7	724.9	780.3	951
1425681_a_at	Prnd	AF165166	0.012557	6.98954e-05	0.000110611	2.08707	17.5805	8.42351	11.1	10.8	8	8	25.1	22.8	12.3	18.9	120.8	167	193.2	185.3
1449359_at	Pax1	NM_008780	0.724368	0.00304238	0.00311805	1.04671	8.79844	8.40579	27.4	21.8	36.1	30.3	34.8	32.2	29	25	117.4	327.4	272.3	300
1420697_at	Slc15a3	NM_023044	0.669225	7.29715e-05	6.17191e-05	0.933406	7.76611	8.32019	56.6	40.7	57.4	30	45.6	46.5	41	39.3	402.3	396.3	265.3	370.5
1418903_at	Aqp2	BC019966	0.131662	3.81939e-07	2.70351e-07	0.78972	6.55491	8.3003	54.4	37.1	40.2	39.5	39.8	29.6	26.6	39.2	306.8	280.6	266.9	267.9
1423555_a_at	Ifi44	BB329808	0.00925351	6.6664e-05	3.38173e-05	0.598497	4.96327	8.29289	33.8	34	30.3	21.7	15.6	21.6	16.1	18.4	151.1	140.1	123.6	179.8
1427508_at	Arsi	BC020108	0.361698	1.01228e-07	4.95265e-08	0.892794	7.39223	8.27988	199.7	131.2	157.8	134.4	141.4	142.3	150.6	122	1162.9	1231.5	1103.7	1108
1449989_at	Mcpt2	NM_008571	0.939377	0.00055372	0.00059627	0.954774	7.90452	8.27895	1.4	10.2	4.5	3.8	1.3	10.7	2	5	32.5	37.5	33.9	53.4
1451406_a_at	Pcsk5	BC013068	0.185721	9.07873e-07	5.19441e-07	0.82376	6.79896	8.25357	206.5	135.2	164	131.5	140.6	128.2	144.1	112	1048.4	1124.6	984.5	1174.8
1453423_at	4933409L14Rik	AI596469	0.00126743	0.967682	0.00164672	0.122353	1.00941	8.25	8.6	15.4	9.9	8.6	0.8	1.9	1.4	1.1	12.5	13.6	5.8	11
1433845_x_at	Dusp9	AV295798	0.54392	0.00825731	0.00467072	0.694915	5.72881	8.2439	3.7	1.4	6.3	0.4	1.6	3.5	1.6	1.5	10.4	12	24	21.2
1422154_at	Gpr27	NM_008158	0.0665223	0.002411	0.000414383	0.424635	3.49757	8.23664	25.8	8.3	16.2	11.4	8.9	7.5	5.8	4	54.8	53.6	37.4	70
1423596_at	Nek6	BB528391	0.0869551	1.90136e-06	1.4135e-06	0.811553	6.68447	8.23663	101.2	99.7	112.2	76.4	74.2	84.9	89.2	67.8	586.3	700.5	614	702.8
1438531_at	A730054J21Rik	BM119567	0.843974	1.67339e-05	1.69731e-05	1.02673	8.44894	8.22897	45.9	35.2	35.4	29.4	39.4	28.8	37.1	44.5	265.7	368.5	297	301.5
1457595_at	---	BB702278	0.00199937	0.0537211	0.00441477	0.245989	2.01604	8.19565	4.1	4.5	3.5	6.6	1.3	1.1	1.2	1	5.1	11.5	7.7	13.4
1425374_at	Oas3	AB067534	0.353417	0.00381611	0.00246353	0.693827	5.67901	8.18505	18.1	6.2	9.2	7	6.3	11.2	5.8	4.8	68.5	73.4	28.8	59.3
1417445_at	Ndc80	NM_023294	0.909092	0.0001118	7.25151e-05	1.04412	8.51765	8.15775	13.4	3.7	3	13.9	7.7	10.7	6.6	10.5	57.4	85.4	65.8	81
1444350_at	Slfn10	BB227643	0.121505	0.000175213	0.00013908	0.647541	5.27869	8.1519	6.1	6.4	7.3	4.6	5.1	1.5	3	6.2	35.9	28	25.9	39
1419282_at	Ccl12	U50712	0.169323	1.00273e-05	1.03467e-05	1.33445	10.8737	8.1485	43.8	35.2	19.5	21.1	35.7	38.1	38.1	47.7	377.3	315.6	275.8	331.8
1423463_a_at	D2Ertd750e	AK012148	0.024467	0.00111757	0.000405586	0.429072	3.48336	8.11837	19	11.3	11.9	14.9	6.2	5.2	1.5	11.6	39.3	40.1	58.4	61.1
1449156_at	Ly9	NM_008534	0.603656	0.000319182	0.000366691	1.21134	9.79381	8.08511	6.6	6.7	8	17.5	16.6	15.1	4.7	10.6	96	125.5	72.3	86.2
1441288_at	2010320O07Rik	AW489857	0.489838	0.00806075	0.000963045	0.54386	4.36842	8.03226	0.7	0.5	0.5	4	0.7	0.8	1.3	0.3	6.9	4.2	5.5	8.3
1448834_at	Foxm1	NM_008021	0.0337066	3.9511e-05	8.98526e-05	3.11679	25.0146	8.02576	3.5	2.2	3.3	4.7	16.4	3.8	11	11.5	79.7	69.2	105.5	88.3
1422789_at	Aldh1a2	NM_009022	0.00562051	0.000166309	0.000104136	0.668063	5.3548	8.01541	170.6	120.3	132.3	149.8	93.5	91.5	103.9	93.9	976.9	670.9	652.4	768.1
1419549_at	Arg1	NM_007482	0.318315	4.49072e-06	0.000100034	2.90323	23.1849	7.98593	4.6	12.8	11.3	17.8	16.7	15.2	9.1	94	315.7	264.2	259.6	238.6
1435190_at	Chl1	BB378591	0.55514	1.40104e-06	2.11138e-06	1.10168	8.79468	7.98296	114.5	102	106.5	87.1	129.1	104.8	73	144.9	998.6	858.5	810.5	939.1
1417488_at	Fosl1	U34245	0.0728233	0.000182593	2.91974e-05	0.405542	3.22922	7.96273	13.2	4.5	8.9	13.1	3.3	1.7	1.9	9.2	27.2	32.8	35.6	32.6
1453196_a_at	Oasl2	BQ033138	0.00639633	0.000177852	0.000133968	0.724102	5.76416	7.96042	70.3	71.2	76.5	71.6	45	56.2	44.6	63.9	502.1	351.3	339	476.9
1446951_at	P4ha3	BB526042	0.198362	7.37163e-07	9.15672e-07	0.814607	6.48127	7.95632	40.1	39.5	34.8	45.8	31	43.3	35.1	21.1	245.2	267.1	241.2	284.8
1438475_at	AB124611	BM246462	0.465697	0.000451239	0.000422854	0.85314	6.77681	7.94337	52.6	39.1	62.3	53	49.5	44.5	61.6	21	390.1	432.5	232.9	347.3
1455034_at	Nr4a2	BB703394	0.152457	1.28081e-06	1.08313e-06	0.874012	6.93236	7.93165	194.8	165.5	202.9	158.3	172.6	164.3	160.7	133	1185.4	1346.8	1339	1130.5
1415856_at	Emb	BG064842	0.133039	5.99861e-08	5.35655e-08	1.15123	9.03712	7.84996	321.7	243.9	292.3	230.5	325.2	287.4	334.9	305.5	2643.1	2454.6	2370.6	2367.7
1450808_at	Fpr1	NM_013521	0.188914	0.0108679	0.00629022	0.540902	4.22204	7.80556	10.7	22.2	17.4	9.6	17.6	9.6	2.8	2.4	79	88.6	31.1	54.2
1437611_x_at	Kif2c	BB104669	0.349719	0.000116333	0.000109906	0.897797	6.99295	7.78901	28.1	26.1	27.4	31.9	23.9	29	18.9	30.1	170.4	194.2	175.2	253.9
1425815_a_at	Hmmr	BC021427	0.714045	1.8018e-05	2.29916e-05	1.10017	8.56374	7.78405	26.3	33.4	20	41.1	24.5	35	22.7	50.7	210.3	257.6	269.7	296.9
1450871_a_at	Bcat1	X17502	0.513146	4.28036e-05	4.11999e-05	0.91363	7.0659	7.73388	42.3	48.6	49.6	59.8	51.6	37.7	57	36.7	330.6	283.9	396.2	404.6
1445804_at	---	BB667304	0.109749	0.000813575	1.1626e-05	0.389961	3.01544	7.73267	8.6	0.8	8.6	7.9	1	4.1	4.1	0.9	17.4	19.8	21.8	19.1
1451612_at	Mt1	BC027262	0.00269272	0.000681155	6.11605e-06	0.277032	2.14064	7.72704	130.9	79.7	131.6	82.3	21.8	22.9	26.3	46.6	234.6	248.7	192.5	232.9
1460111_at	Myt1l	BM936763	0.653056	0.00309822	0.00103256	0.735294	5.67647	7.72	0.2	0.6	0.4	2.2	0.4	0.4	0.8	0.9	6.3	5.7	3.4	3.9
1451191_at	Crabp2	BC018397	0.534384	3.55906e-07	7.42908e-07	1.12225	8.64811	7.70608	129.7	95.7	102.5	103.2	116.3	92.2	100.8	174.5	997.6	838.2	937.8	954.6
1459999_at	Sfrs15	AV350566	0.0516472	0.051968	5.8059e-06	0.232558	1.77907	7.65	14.1	7.8	18.1	3	1.6	4.4	1.7	2.3	16.7	19.4	21.1	19.3
1448314_at	Cdk1	NM_007659	0.279419	1.43858e-05	2.23928e-05	1.33489	10.2097	7.64836	51.6	67.1	50.3	87.5	74.7	76.2	59.7	131.8	554.3	637.5	651.8	775.2
1419321_at	F7	NM_010172	0.46197	0.000329928	0.000199163	0.808735	6.18373	7.64618	23.1	22.2	6.2	14.9	11.8	13.6	16.1	12.2	90.7	123.9	77.6	118.4
1429947_a_at	Zbp1	AK008179	0.382608	0.000137773	9.05521e-05	0.760521	5.81263	7.64295	28.3	34.3	10.8	26.4	12.1	26.4	12.4	25	180.1	118.8	133.8	147.4
1453410_at	Angptl4	AK014564	0.274121	0.00106544	0.000422254	0.639216	4.87255	7.6227	22.6	9.1	13.1	6.2	6.2	8.6	11.8	6	48.2	81.4	52	66.9
1422235_at	Htr7	NM_008315	0.135928	0.159176	0.000262672	0.228916	1.74096	7.60526	1.8	1.1	9	4.7	0.5	2.4	0.5	0.4	9	6.9	7.2	5.8
1421977_at	Mmp19	AF153199	0.792828	8.40143e-05	8.00775e-05	0.965116	7.33966	7.60495	45.4	42.5	46.3	29.2	41.2	46.6	39.4	30.5	261	376.5	259.9	301.9
1445292_at	Cd300a	BB310483	0.648732	0.00467391	0.00191816	0.702703	5.34122	7.60096	3.7	2.6	19.4	3.9	2.8	3.1	11.9	3	36.5	51.3	23.6	46.7
1444176_at	Atp6v0d2	AV204216	0.539795	0.000530787	0.000568061	1.07466	8.16292	7.59582	85.1	70.3	90.2	70.5	67.9	87.9	80.1	103.8	454.7	571.9	842.7	711
1416298_at	Mmp9	NM_013599	0.0495737	7.85385e-05	8.83467e-05	1.19463	9.06147	7.58514	560.4	472.2	444.8	390.2	548.6	589	543.4	550.1	3455.8	3672.1	4704.1	5091.2
1454788_at	Arl4c /// LOC632433	BQ176306	0.144601	1.33674e-06	1.08033e-06	0.870518	6.59825	7.57968	164.9	136.6	138.4	176.4	142.9	116.7	130.9	146	1014.6	1140.2	974.2	937.5
1457145_at	Plekhg4	AV271771	0.562779	2.47185e-05	2.46544e-05	1.07295	8.08897	7.53897	35.7	27.1	21.3	28.3	32.5	27.6	33.2	27.3	182.1	246.2	221.9	259
1444302_at	Gxylt2 /// LOC100048436	AV278332	0.248624	0.00010687	0.000113411	1.09964	8.28311	7.5326	86	94.1	66	83.1	97.2	89.5	85.1	90.2	536	735.1	616.6	839.1
1456545_at	Il18rap	AV247387	0.0100079	5.74286e-05	2.98483e-05	0.464646	3.48325	7.49657	38.7	55	46.9	47.5	13.4	24.5	37.5	12	170.7	186.6	133.3	164.6
1427656_at	Tcrb-J	X14388	0.00610697	0.309674	0.00681254	0.18705	1.39568	7.46154	9.5	11.1	21.7	13.3	2.4	3.4	2.7	1.9	18.8	11.9	15.8	31.1
1415922_s_at	Marcksl1	NM_010807	0.962305	6.8424e-06	5.46083e-06	0.993475	7.41094	7.45962	221.4	154.5	178.1	120.3	180.7	155.4	178.1	155.7	1195.5	1403.5	1076.9	1321.3
1456212_x_at	Socs3	BB831725	0.0125203	0.000322202	0.000206621	0.685056	5.10005	7.44471	363	292.9	349.5	258	210.1	237.1	239	179.3	1511.6	2077.2	1240.8	1613.8
1426028_a_at	Cit	AF086823	0.255811	3.34522e-07	2.14773e-05	2.36364	17.5303	7.41667	1.7	1.7	1.2	2	5.6	1.3	0.6	8.1	27.1	31.8	27.2	29.6
1422860_at	Nts	NM_024435	0.99566	5.76621e-05	6.58291e-05	1.00116	7.38211	7.37355	26.4	16.2	24.1	19.4	29.1	12	25.7	19.4	167.5	186.5	159.6	122
1425850_a_at	Nek6	BC019524	0.285673	2.0281e-06	1.99233e-06	0.849833	6.25012	7.35453	52.2	57.5	58.5	40.9	59.9	41.5	35.3	41	297.6	309.2	335.6	364.5
1416558_at	Melk	NM_010790	0.618078	2.223e-05	4.70631e-05	0.850649	6.22078	7.31298	23.5	27.5	25.4	31.4	17.3	23.1	8	43.3	133.4	171.1	185.1	181
1420591_at	Gpr84	NM_030720	0.178072	0.000284087	1.76526e-05	0.540541	3.95135	7.31	22.7	18	10.1	4.7	10.4	8.1	4.9	6.6	63.8	47.1	57.4	51
1430111_a_at	Bcat1	AK012821	0.588341	1.34526e-05	7.22029e-05	1.3705	9.9964	7.29396	11.4	4.2	5.3	6.9	4.4	22.1	5	6.6	60.2	74.4	63.5	79.8
1416576_at	Socs3	NM_007707	0.1792	0.00147146	0.00110135	0.781005	5.68713	7.28182	305.7	183.6	240.5	175.7	197.4	174.1	193.1	142.6	1199.9	1738.6	828.7	1382.5
1452365_at	Csgalnact1	AV371987	0.0016398	2.26593e-08	1.24419e-08	0.747221	5.44018	7.28055	95.4	84.7	94.1	103.6	70.1	73.3	74.1	64.8	519.4	525.7	483.1	527.1
1448742_at	Snai1	NM_011427	0.623352	9.6042e-05	8.812e-05	0.951194	6.90239	7.25655	44.9	37.8	57.2	48.6	47.9	47.6	43.8	40	345.5	319.1	246.3	390.2
1431970_at	Tm7sf4	AK014697	0.266978	0.000134321	0.000153454	1.20311	8.68421	7.21811	31	42.4	23	38.5	50.4	40.5	33.3	38.1	210.3	288.4	335.3	337.5
1438073_at	Spry3	AW047633	0.51414	0.0256486	0.00409541	0.529851	3.8209	7.21127	0.3	9.6	0.5	3	0.3	1.1	2.4	3.3	17.9	6.8	11.8	14.7
1419427_at	Csf3	NM_009971	0.545391	0.00167878	0.00288808	1.41791	10.204	7.19649	6.1	3.4	4.2	6.4	7	2.9	16.2	2.4	49.6	65.7	62	27.8
1451710_at	Oscar	AF391160	0.895093	0.00109108	0.00114085	1.02309	7.33835	7.17272	29.5	22.6	27.8	19.7	17.4	21.8	31.5	31.2	117.5	160.3	231.2	221.9
1436529_at	Gpr123	BI135044	0.728776	7.60297e-06	6.03829e-06	0.92233	6.61165	7.16842	2.2	3	3.5	1.6	2.9	2.9	2.3	1.4	15.2	16.5	19.6	16.8
1448901_at	Cpxm1	NM_019696	0.00308541	7.81593e-05	0.000111017	1.67631	12.0115	7.16545	103.6	146.2	95.1	97.5	182.6	202	199	158	1113.1	1677.3	1164.1	1359.4
1440491_at	Slc1a3	BB328290	0.161681	0.000638656	0.000545877	0.866953	6.19742	7.14851	21	18.1	16	14.8	15.7	13.6	15.9	15.4	119	106.9	136.6	70.7
1442339_at	Stfa2l1	BB667930	0.880206	0.000316308	0.000364251	1.04419	7.43434	7.11971	14.8	16	28.6	19.8	33.2	21	11.5	17	180.5	150.1	100.1	158.1
1436512_at	Arl4c /// LOC632433	BI964400	0.0182289	8.19498e-06	5.90321e-06	0.791038	5.61942	7.10386	141.2	142.7	178	167.4	122.1	120.8	117.1	137.8	922.1	977.5	739.6	897.1
1434195_at	Prss35	BB042892	0.197632	0.000435181	0.000484055	1.13527	8.06336	7.10256	50.9	41.4	37.9	45	56.9	49.6	42.2	50.2	253.3	385.2	315.4	458.8
1445254_at	---	BB151417	0.225478	0.0795301	0.00173622	0.315508	2.24064	7.10169	4	4.1	22.9	6.4	2.1	2.1	0.8	6.8	19.8	24.9	12.7	26.4
1432283_at	4930417G10Rik	AK015158	0.0690346	0.0500945	0.00134425	0.29148	2.06726	7.09231	9.9	2.3	3.3	6.8	1.7	2.8	1.1	0.9	16.3	8.5	11.5	9.8
1424923_at	Serpina3g	BC002065	0.0425532	3.09702e-05	4.19429e-06	0.564662	3.99774	7.07989	97.2	66.5	50.3	52	41.1	43.2	36.5	29.4	226.1	264.7	286.3	286.3
1454592_at	9430012M22Rik	AK020412	0.581776	1.27483e-05	1.24849e-05	0.964824	6.8033	7.05134	31.4	37	36.5	34.4	36.3	34.7	28.7	34.7	204	264.4	217	262.3
1425119_at	Oas1b	BC012877	0.243649	0.0149262	0.00306903	0.483425	3.40608	7.04571	17.3	5.8	1.4	11.7	6.6	5.3	3.8	1.8	34.9	20.2	24	44.2
1451342_at	Spon1	BC020531	0.379013	2.45673e-06	1.05312e-06	0.86866	6.10826	7.03182	547.5	404.5	594	317.1	406.1	396.2	388.9	427.2	3073.8	2932.8	2499.7	2874
1429294_at	Trip13	AK010336	0.0984229	0.00162687	0.00110235	0.6957	4.88534	7.02219	17.7	20.3	23.4	29.3	22.2	11.3	17.2	12.4	70.5	130.9	100.1	141.6
1435529_at	Gm14446	BM245961	0.226163	0.00631454	0.00806713	1.51515	10.6333	7.018	6.7	13.6	2.7	10	6.8	15.6	11.7	15.9	74.7	91.7	46.4	138.1
1454995_at	Ddah1	AW556888	0.0481921	5.76919e-06	4.22776e-06	0.8153	5.7145	7.00908	155.5	127	129.5	114.8	104.9	112.4	117.2	95	672.1	697.6	845.8	794.9
1416414_at	Emilin1	NM_133918	0.0636066	8.69821e-06	7.64062e-06	0.883986	6.19376	7.00663	212.7	222.5	249.9	219.1	200.9	207.6	214	176.8	1200.4	1351.3	1447.3	1601.4
1417359_at	Mfap2	NM_008546	0.0245782	0.000502025	0.000565833	1.1638	8.15161	7.00433	234.2	264.5	273.6	220.4	284.3	282.5	305	283.5	1521.1	2680.3	1696.7	2194
1428018_a_at	AF251705	AF251705	0.0199567	1.26089e-06	8.53615e-07	0.774866	5.40802	6.9793	161.7	125.6	144	129.7	92.2	114.3	109.2	119	806.3	788.1	667.9	771.6
1443908_at	---	BB205833	0.628963	0.00756666	0.00883494	0.706173	4.90864	6.95105	9.8	4.1	11.8	14.8	2.4	23.3	2	0.9	59.4	68.3	23.2	47.9
1419060_at	Gzmb	NM_013542	0.425391	0.00246743	0.00124856	0.708955	4.92786	6.95088	9.3	1.6	14.5	14.8	6.9	8.6	3.1	9.9	68.3	53.7	39.1	37
1454051_at	Fam123a	AK011185	0.174764	4.95871e-05	0.000157062	2.23358	15.5109	6.94444	2.2	2.1	5.8	3.6	12.5	11.7	2.2	4.2	64.2	57.9	44.6	45.8
1458718_at	---	BE634580	0.448143	0.00391875	0.00307531	0.773547	5.36874	6.94041	15.8	17.5	8.8	7.8	13	3.7	14.4	7.5	68.3	94.3	36.9	68.4
1417483_at	Nfkbiz	AB026551	0.218186	3.53216e-06	1.92261e-06	0.839821	5.81798	6.92765	229.3	175	201.1	131.9	151.7	160.3	140.4	166.8	1142.7	1074.6	1144.3	928
1427789_s_at	Gnas	AI561892	0.000685633	5.58377e-05	7.39191e-05	1.4375	9.945	6.91826	8.5	10.6	9.9	11	14.1	15.3	14.7	13.4	102.5	115.6	74.2	105.5
1424754_at	Ms4a7	BC024402	0.395656	2.16526e-06	2.19601e-06	1.05819	7.31455	6.9123	297.7	259.3	337.4	293	292.8	330.1	332.4	301.2	2166.5	2453.1	1945.1	2120.6
1416560_at	Slc13a3	NM_054055	0.953909	0.00553049	0.00545756	0.979167	6.73958	6.88298	23.6	14.7	29.7	8.8	15.2	26.4	26.6	7	135.4	199.2	99.4	83.6
1421976_at	Mmp19	AF153199	0.680125	3.79919e-05	3.19633e-05	0.915033	6.2933	6.87768	29	44	23.6	25.8	23.7	36.1	32.7	19.5	164.7	220.7	171.3	213.6
1450842_a_at	Cenpa	AV132173	0.98777	2.68354e-05	2.67267e-05	1.00095	6.88406	6.87756	83.4	70.5	77.1	86.4	72	83	76.9	85.8	535.8	536.9	457.5	654.8
1418204_s_at	Aif1	NM_019467	0.0650448	0.000191167	0.000168562	0.89568	6.1471	6.86306	119.4	103.7	129.6	121.8	108.4	106.5	105.3	104.8	894.4	753.6	529.2	739.6
1420463_at	Clnk	NM_013748	0.342619	0.00792719	1.92446e-05	0.448276	3.07471	6.85897	1.9	10.8	1	3.7	1.8	0.4	1.8	3.8	11.6	13.6	14.6	13.7
1452366_at	Csgalnact1	AV371987	0.01468	4.49917e-08	1.36742e-08	0.771614	5.28481	6.84903	290.1	221.9	290.3	243.3	190.7	203.5	208.4	204.2	1396.3	1385	1304.2	1440.3
1417282_at	Mmp23	NM_011985	0.0852268	1.11531e-05	1.27044e-05	1.16248	7.95361	6.84191	108.3	130.5	100.2	107.2	122.6	147	122.3	126.8	752.1	909.8	856.4	1030.6
1437339_s_at	Pcsk5	BB241731	0.112067	4.49415e-07	2.56919e-07	0.834445	5.69957	6.83038	483.9	363.4	383.8	343	342.1	365.2	312.1	294.1	2339.8	2228.5	2038.5	2364.9
1460218_at	Cd52	NM_013706	0.0061126	2.65193e-05	2.07177e-05	0.768886	5.24776	6.82515	384.6	396	407.2	398	360.8	303.7	299.7	255.1	2440.7	2133.2	1730.6	2017.4
1448501_at	Tspan6	NM_019656	0.625632	8.53634e-07	7.2554e-07	0.95705	6.51507	6.80744	148.6	127.1	178	147	161	148.4	134.9	130.6	867.7	981.4	1036.3	1028.2
1431087_at	Spc24	BF577722	0.548125	0.000181838	0.000212188	1.21498	8.26491	6.80251	28.9	17.4	18.3	7.5	24.1	13.2	17.6	32.7	117.8	127.4	171.5	179.2
1433909_at	Syt17	AW048713	0.0861644	0.000997875	0.000476656	0.526515	3.58081	6.80096	25.5	23.1	18	12.6	12.7	5.2	19.5	4.3	94	61.7	58.1	69.8
1448395_at	Sfrp1	BI658627	0.376542	0.000236019	0.000249505	1.1078	7.4922	6.76313	177.2	133.8	130.7	199.3	157.5	182.2	186.3	184.1	1593.6	1124.1	1028.6	1056.2
1419769_at	Cd22	AF102134	0.00676777	0.0050187	5.17502e-05	0.276074	1.86503	6.75556	15.3	6.7	13.6	13.3	1.9	2.9	6.6	2.1	25.7	24.5	18.6	22.4
1449906_at	Selp	M72332	0.317516	0.000154008	0.000112852	0.831026	5.59676	6.73476	117.4	89.6	113.6	62.3	75.4	102.1	69.1	71.6	392.2	588.4	540	622.4
1418133_at	Bcl3	NM_033601	0.677295	1.31279e-05	1.17137e-05	0.96714	6.49734	6.71809	52.9	57.5	67	47.8	54.3	57.2	54.6	51.7	400.9	349.2	306.6	406.5
1438490_at	Slc39a14	BB769796	0.290034	1.99113e-05	1.12833e-05	0.782663	5.25697	6.71677	43.5	29.2	56.4	32.4	24.4	42.1	24.3	35.6	233.2	176.3	211.2	228.3
1418149_at	Chga	NM_007693	0.121895	0.000437707	5.46768e-05	0.487759	3.27495	6.71429	14.7	19.6	4.6	14.2	2.1	3.9	11.2	8.7	51	45.5	37.8	39.6
1428713_s_at	Gins2	AW488914	0.0441602	5.21262e-05	4.46634e-05	0.501436	3.35823	6.69722	61.4	45	65.5	71.8	44	11.3	14	52.9	195.7	173.2	217.1	232.4
1444088_at	---	BE447255	0.0697301	0.00416011	0.00206067	0.551864	3.68801	6.68282	25.6	30.8	42.1	24.9	21	20.8	2.6	23.7	155.7	123.4	68.9	107.1
1451798_at	Il1rn	M57525	0.177845	1.57699e-07	1.55963e-06	1.62594	10.8591	6.67868	21.6	28.4	16.4	13.8	30.2	26.9	19.1	54.2	234.4	214.7	218.7	203.1
1416872_at	Tspan6	NM_019656	0.875344	4.94029e-06	4.84964e-06	1.01248	6.75067	6.66747	84.4	106.2	113	105.1	98.7	92.4	111.9	110.8	589.8	696.2	698.7	774.3
1437631_at	Kcnip4	BB188374	0.240028	0.0219447	0.00280892	0.451327	3.00885	6.66667	0.5	5.5	3.9	1.4	1.1	2	0.5	1.5	9.3	12	5.1	7.6
1429527_a_at	Plscr1	BF319989	0.00199098	0.00173338	0.000634538	0.5161	3.43202	6.64991	23.3	30.7	32.8	25	16.1	14.9	16	10.7	86.8	94	72.1	130.8
1451596_a_at	Sphk1	AF068749	0.175168	2.3996e-07	4.03222e-07	1.43665	9.54725	6.64552	120.6	62.1	94.5	51.9	109.6	109.2	86.4	167.6	762.5	736.2	839.1	804.2
1450429_at	Capn6	AI747133	0.00347352	2.48323e-05	3.15722e-05	1.36746	9.08066	6.64053	66.2	79.9	83.2	60.8	99.2	97.6	104.6	95.3	526	681.9	657.3	769.1
1455400_at	Ddah1	BB770857	0.249785	2.13001e-07	2.42904e-07	1.14511	7.58897	6.62729	45.8	32	34.5	40	47.5	49.5	41.4	36	267.6	284.2	292.4	311.6
1442156_at	E030030I06Rik	BB664243	0.921731	0.00314795	0.0045273	1.06034	7	6.60163	2.6	5	1.7	2.3	3.6	1.3	7.2	0.2	25.3	11.3	17.8	26.8
1451181_at	Tmem121	AF488729	0.268173	0.00067307	0.000145484	0.597964	3.94656	6.6	7.5	15.1	3	13.7	8.5	8.8	2.9	3.3	28.8	45.4	40.5	40.4
1424605_at	Pcsk5	BC013068	0.874021	7.57962e-08	7.60677e-07	1.03414	6.82379	6.59851	23.6	21.2	24.2	21.8	35.9	25.1	17.3	15.6	160.8	159.9	142.6	156.3
1450165_at	Slfn2	NM_011408	0.000878156	5.13754e-05	3.36078e-05	0.697377	4.60102	6.5976	244.4	232.5	224.9	243.6	168.6	166.3	136.2	188.2	1159.3	1187.5	838.5	1164.5
1442884_at	Hgf	BB476818	0.306217	8.4843e-05	0.000147389	1.67003	11.0168	6.59677	2.6	8.7	14.9	3.5	17.5	13.1	2.5	16.5	89.8	98.5	66.7	72.2
1417487_at	Fosl1	U34245	0.922353	0.000165618	8.15811e-05	1.04162	6.86445	6.59018	40.4	14.2	26	3.5	20.2	27.2	27.1	13.1	181.4	125.8	133.7	136.4
1451532_s_at	Steap1	AF297098	0.0377302	8.76102e-08	5.60946e-08	0.851072	5.6078	6.5891	60	57.3	68.8	70.4	50	56.1	55	57.2	377	341.6	345.8	374
1452492_a_at	Slc37a2	BC022752	0.0975496	0.000199109	0.000250666	1.27917	8.41304	6.57693	91.2	75.4	86.9	61	98.3	76.2	113.1	114.7	526.1	547	784.1	788.7
1438651_a_at	Aplnr	BB483357	0.372233	4.86758e-07	3.72545e-07	0.931504	6.12524	6.57564	610.5	561.6	642.7	474.4	534.5	576.8	490.6	530.5	3263.4	3620.6	3339.3	3798.6
1421931_at	Icos	AB023132	0.859806	4.79627e-05	0.000288549	1.15823	7.60759	6.56831	2.2	2.1	9.3	2.2	13.2	2.1	1.1	1.9	35.1	29.5	26.7	28.9
1444405_at	E030037K03Rik	BB534560	0.762065	0.00166552	0.000931915	0.787879	5.17172	6.5641	2.5	6	0.3	1.1	0.4	4.9	2.2	0.3	11.3	11.7	11.1	17.1
1421991_a_at	Igfbp4	NM_010517	0.120122	3.36532e-05	3.8531e-05	1.17643	7.72027	6.56246	251	338.7	291.6	245.5	343.7	336.4	283.3	362.2	1976.3	2516.1	1800	2406.8
1418724_at	Cfi /// LOC100047470	NM_007686	0.280217	1.42014e-05	1.11306e-05	0.846545	5.55418	6.561	43.2	33	34.3	27	35.3	24.3	32.9	23.9	185.5	210.8	159.8	207.6
1450929_at	Zfp57	BB549686	0.915838	0.00455253	0.0047807	1.02326	6.7093	6.55682	1.8	2.5	2.6	1.7	1.6	2.2	3.3	1.7	11.2	18.4	19.8	8.3
1440275_at	Runx3	AV233043	0.0700347	0.000347023	0.000228585	0.756824	4.95616	6.54863	33.2	37.3	23	27.4	24.7	21.9	24.7	20.2	121.5	192.4	157.1	128.2
1433325_at	9330154F10Rik	AK020373	0.185668	0.00333564	0.000468172	0.509158	3.32967	6.53957	1.5	10.6	5.6	9.6	1.9	2.2	5.3	4.5	25.7	16.5	20.3	28.4
1443589_at	DXErtd242e	C79245	0.0628921	3.44035e-05	2.81194e-05	0.753745	4.92884	6.53913	24.2	26.4	30.4	25.8	23.5	24.6	13.3	19.1	128.8	118	159.2	120.4
1441228_at	Apold1	BM123813	0.0133898	0.000321308	7.95748e-05	0.531573	3.47235	6.53222	203.2	149.8	257.1	154.8	114.4	88.2	110.7	93.3	643.3	720.7	783.2	508.8
1436055_at	Lrrc15	AI506528	0.126084	0.000309374	0.000571314	1.73652	11.3327	6.52607	56.3	49.2	53.5	37.6	69	58.7	144.8	68.9	397.8	731.7	542	556.5
1424292_at	Depdc1a	BC005799	0.00188158	0.00219136	0.00112526	0.595477	3.88442	6.52321	8.5	10.1	10.9	10.3	4.9	6.4	5.1	7.3	24.7	45	35	49.9
1423100_at	Fos	AV026617	0.0239533	0.00359042	0.00111017	0.51771	3.37682	6.52261	1294.9	1090.8	946	564.3	529.3	513.6	547.5	426.6	4064.3	2842.9	4090.1	2158.8
1422953_at	Fpr2	NM_008039	0.295426	0.000273065	0.000396159	1.31855	8.59968	6.52209	44.1	46.8	60.8	35.4	92.3	67.9	47.7	38.8	478.7	458.2	271.7	400.4
1455660_at	Csf2rb	BB769628	0.375273	1.79313e-06	1.60863e-06	0.88133	5.73044	6.50204	235.6	198.9	255.2	173.2	175.7	228.8	142.4	213.6	1211.7	1335.1	1097.3	1300.7
1453244_at	5830416P10Rik	AK017935	0.103845	0.000672199	0.000372464	0.666978	4.32556	6.48531	25.8	31.7	32.9	16.8	23	21.5	10.3	16.7	133.1	125	76.1	129.5
1422148_at	Matn3	NM_010770	0.618687	0.000736256	0.000696737	1.19444	7.71667	6.46047	6.7	34.8	13	17.5	20.7	19.6	16.1	29.6	117.6	114.4	131.3	192.3
1441317_x_at	Jakmip1	BB316060	0.000720996	0.526535	0.000554035	0.140145	0.904159	6.45161	29.2	25.7	35.3	20.4	1.5	1.2	2.8	10	30.1	24.8	18.6	26.5
1421207_at	Lif	AF065917	0.643238	0.00464428	0.00431882	0.935714	6.03442	6.44899	50.5	31.1	37.9	34.5	39.8	41.4	33.6	29.3	320.4	169.3	294.6	145
1424118_a_at	Spc25	BC027121	0.0593279	3.00704e-06	5.40092e-06	1.46383	9.42134	6.43607	33	22.5	24.2	30.9	40.7	36.8	30.6	53.8	228.9	266.6	251.9	294.6
1436576_at	Fam26f	BB239429	0.776029	1.70202e-05	1.43748e-05	0.962214	6.17838	6.421	21.9	34.4	33	24.5	31.9	28.9	25	23.7	207.5	167.1	153.3	175.2
1419149_at	Serpine1	NM_008871	0.000448161	1.70168e-06	2.41677e-08	0.437234	2.80623	6.41814	490.8	373.1	544.8	445	200.2	229.5	182.9	197.9	1288.7	1244.7	1291.6	1376.9
1444003_at	Neurl3	AW610818	0.00570585	2.40729e-05	9.21652e-06	0.582372	3.73558	6.41442	116.3	87.4	115.1	88.5	50.8	77.5	56.7	52.2	441.6	386.3	351.7	341.9
1449141_at	Fblim1	BG070068	0.0476637	2.80508e-06	2.16716e-06	0.848231	5.43265	6.40468	81.1	82.2	89.3	69.6	72.9	60.8	72	67.6	415.9	439.2	400.1	495.2
1416076_at	Ccnb1 /// Gm5593 /// Gm8416	NM_007629	0.172148	5.49963e-06	1.15049e-05	1.45122	9.28659	6.39916	18.5	10.7	15.1	21.3	21.2	17.8	20	36.2	131.6	145.1	161.2	171.3
1434316_at	Chsy1 /// LOC100047167	BQ174991	0.136755	4.90385e-06	2.80817e-06	0.822241	5.25573	6.39196	307.4	256.6	371.4	247.1	234.3	231.1	276.3	230.6	1358.3	1612.2	1521.5	1722.9
1448449_at	Ripk3	NM_019955	0.0580188	1.11747e-07	1.59186e-08	0.772095	4.929	6.38392	62	52.4	47.2	39.8	41.3	41	38.5	34.7	234.6	251.5	248.3	258.3
1444443_at	---	AV228095	0.209728	0.0145087	0.000822882	0.386047	2.46047	6.37349	7.3	9.4	4.4	0.4	0.7	6	1	0.6	12.2	10.5	16.3	13.9
1448162_at	Vcam1	BB250384	0.00506443	7.38314e-05	3.06941e-05	0.602593	3.83891	6.37065	471.2	460.9	452.3	327.7	246.3	307.7	208.9	268.8	1312.6	1849.8	1605.8	1804.4
1418655_at	B4galnt1	U18975	0.285059	1.16788e-05	7.69297e-06	0.867559	5.5233	6.36649	66.1	38.6	57	55	52.4	48	45.3	42.3	264.7	311.8	277.4	343
1420566_at	---	NM_025367	0.0190059	6.42945e-07	4.97073e-08	0.624814	3.97548	6.36266	37.1	37.2	37.4	22.9	20.6	21.9	16.7	24.9	133.7	128.5	142	130.9
1421074_at	Cyp7b1	NM_007825	0.202758	5.87273e-08	8.71969e-08	1.12422	7.13954	6.35064	64.7	59.5	64.3	53	76.7	71.4	67.8	55.6	400.1	453.2	433.8	437.1
1441887_x_at	Gm6377	BB548587	0.167458	0.00381182	0.00148154	0.626549	3.96283	6.32486	14.3	22.7	13.1	6.4	9.2	9.5	8.6	8.1	38.4	78.7	49.3	57.5
1450156_a_at	Hmmr	AF079222	0.641098	0.000304325	0.000227647	0.909928	5.75128	6.32058	15.2	34.3	20	28.2	19.2	20.6	23.5	25.6	120.5	110.7	155.8	174.9
1440878_at	Runx1	BB795285	0.0351231	2.17401e-06	1.55815e-06	0.821827	5.1787	6.30145	205.4	165.1	176.9	205.8	160.8	137.6	150.8	169.8	948.8	864.8	1060.2	1026.8
1424650_at	Pdia5	BC009151	0.0226827	1.15375e-06	7.84138e-07	0.84	5.28062	6.28646	163.8	147.2	183	148.5	138.3	134.4	134.4	132.6	795.3	908.2	783.2	906.1
1419128_at	Itgax	NM_021334	0.0104288	3.8556e-05	1.3969e-05	0.610335	3.8362	6.28541	77.3	57.9	79.7	92.8	42.7	56.8	49	39.3	299.2	341	248.2	292
1450920_at	Ccnb2	AK013312	0.591588	7.17191e-05	8.75243e-05	1.11772	7.02495	6.28504	53.9	60.4	40	74.2	60	56.9	47.3	91.2	334.3	354.1	431.2	485.6
1422177_at	Il13ra2	BC003723	0.0227221	0.00331623	0.00101459	0.513654	3.21651	6.26203	52.5	41.1	33.1	27.1	23.9	24.6	13	17.5	174.2	96.3	114.2	110
1448239_at	Hmox1	NM_010442	0.193189	1.11018e-05	9.34589e-06	0.915503	5.73141	6.2604	193.7	166.8	194	154.4	163	158	159.2	168.8	874.2	955.9	1081	1151.9
1417263_at	Ptgs2	M94967	0.966562	0.00147917	0.00157895	1.00907	6.31216	6.2554	12.1	10.6	15.5	16.9	15.1	20.3	9.3	10.9	119.1	74.4	95.8	58.5
1447890_at	Rcn1	BB412039	0.305996	0.00162236	0.00115295	0.76	4.74667	6.24561	14	21.9	12.9	11.2	12.2	8.7	7.5	17.2	48.5	69.8	68.9	97.6
1429298_at	Ddah1	BE283964	0.339844	2.37023e-07	2.42595e-07	1.11714	6.96893	6.23819	94.9	87.6	126.6	96.4	131.5	106.9	118.2	96.4	675.4	668.7	717.7	764.1
1458299_s_at	Nfkbie	BB820441	0.0462608	7.05722e-06	4.35955e-06	0.800279	4.98745	6.23214	95.3	82.2	105.6	75.4	76.1	75.6	67.5	67.7	422.2	518.3	430	417.5
1444427_at	Lipi	BB527125	0.381641	0.0165105	0.00544919	0.546243	3.40173	6.22751	2.7	3.2	16.4	12.3	2.8	11.9	2	2.2	17.2	34.5	24.7	41.3
1447863_s_at	Nr4a2	BB322941	0.0265304	2.04782e-05	1.67891e-05	0.808564	5.02864	6.21922	176	178.4	193.9	171	160	156.7	151.1	113.8	912	972.4	1000.5	732.2
1422476_at	Ifi30	NM_023065	0.0950572	1.58285e-07	1.49726e-07	0.898918	5.58836	6.21676	657.8	591.1	681.6	666.4	632.7	595.7	508.5	597.5	3353.5	3682.5	3605.8	3870.6
1439072_at	Slc1a3	BB308757	0.578368	8.6897e-07	2.06912e-07	0.916084	5.69431	6.21592	57.8	37.7	65.9	38.8	43.1	45	49.7	45.6	262	305.2	281.9	290.9
1416211_a_at	Ptn	BC002064	0.00191753	0.000429488	0.000624247	1.64491	10.198	6.19974	72.6	122	83.6	91	144.9	145.5	155.4	161.5	647.2	1128.9	838.4	1150.6
1428550_at	Ydjc	AK007503	0.10681	5.79821e-05	4.64151e-05	0.833733	5.14548	6.17162	33.5	26.6	35.2	29.8	24.2	23.1	25.2	31.8	123.8	169	182.8	168.1
1435306_a_at	Kif11	BM234447	0.341174	0.000548033	0.000417055	0.790548	4.87755	6.16984	28.9	15.9	19.6	28.7	13.7	19.4	12.9	27.6	96.2	90.1	120	147.8
1437580_s_at	Nek2	C77054	0.676512	2.96888e-05	1.93272e-05	0.865478	5.33063	6.15918	7.1	23.1	12.3	19.2	12.4	13.6	6.1	21.3	95.4	74.8	83	75.7
1439434_x_at	Sh2d5	BB317673	0.393493	0.00739774	0.00337188	0.616279	3.7907	6.15094	8.8	5.9	0.8	10.3	1.2	8.6	1.7	4.4	13.6	23.1	31.1	30
1428104_at	Tpx2	AK011311	0.22245	0.000315983	0.00017562	0.738331	4.5396	6.14847	28.6	38.9	24.1	49.8	18.3	24.1	26.1	35.9	141.1	138.8	154.9	207.1
1422970_at	Mxd3	NM_016662	0.138125	0.00141976	0.00253951	1.84393	11.3179	6.13793	4.9	4.2	2.8	5.4	12.4	2.8	6.9	9.8	35.1	71.8	42	46.9
1417256_at	Mmp13	NM_008607	0.0247491	7.39458e-07	8.65601e-07	1.45796	8.93807	6.13054	936	545	688.9	583.4	914.9	985.7	938.8	1174.8	6308.7	5496.1	6145.1	6659.3
1417457_at	Cks2	NM_025415	0.482876	1.40939e-06	3.42704e-06	1.13745	6.9431	6.10412	135.9	148.2	172.6	147.9	200	138.4	117.1	232.2	918.5	1064.8	1073.5	1141
1445758_at	---	BG076276	0.46304	9.24791e-06	9.94323e-06	1.04146	6.35336	6.10044	136.4	120.8	133.9	129.9	153.4	131.3	127.3	130.6	707.2	935.4	785.9	881.6
1450826_a_at	Saa3	NM_011315	4.45616e-06	1.67015e-06	4.93421e-06	15.6695	95.5122	6.09541	25.6	60.7	61.6	73.3	898.6	717.4	900.4	949.7	5953.1	4562.9	5297.1	5314.2
1417018_at	Efemp2	NM_021474	0.57377	2.22484e-07	2.41563e-07	0.968895	5.8931	6.0823	624.3	588.9	552	591.3	590.5	556.5	632	504.2	3217.7	3617	3359.8	3692.6
1419152_at	2810417H13Rik	AK017673	0.914235	0.000174224	0.000188819	1.0228	6.21254	6.07404	31.8	34.7	19.3	37	32.3	24.9	23.7	44.7	154	180.7	184	244.2
1417267_s_at	Fkbp11	NM_024169	0.127868	2.63435e-06	2.33039e-06	0.86829	5.26892	6.06815	106.4	95.5	95.4	84.6	89.1	66.3	89.3	86.9	439	519	550.9	503.3
1418932_at	LOC100046232 /// Nfil3	AY061760	0.137757	1.31615e-07	1.16822e-07	1.25171	7.59414	6.06703	84.1	53.7	57.5	53.8	87.4	62.1	80.6	81.7	457.2	510.5	463.1	460.9
1444179_at	A530023O14Rik	BB220313	0.772564	0.000232797	0.000257899	1.18227	7.16256	6.05833	11.3	5.1	2.1	1.8	4.5	0.7	9.9	8.9	40.9	34.7	27.6	42.2
1428481_s_at	Cdca8	AV307110	0.848598	0.000103027	0.000116872	0.96012	5.81555	6.05711	44.4	38.2	59.6	58.4	43.5	36.5	39.2	73.4	220.9	292.5	306.7	346.5
1417025_at	H2-Eb1	NM_010382	0.011327	5.7698e-06	3.38692e-06	0.733395	4.44155	6.05615	758.6	636.7	799.6	634	580.8	475.6	561.4	456.9	3585.7	3147	2914.5	2917.5
1448378_at	Fscn1	NM_007984	0.108226	2.04201e-06	1.62349e-06	0.864369	5.22905	6.04956	178.3	154.5	136.8	163	153.1	136.2	117.4	140.1	758.4	858.2	775.9	915.4
1440920_at	Mmp14	BB535404	0.0268424	3.78839e-06	4.72006e-06	1.25273	7.57469	6.04653	135.2	110.7	150.2	125.4	156.7	174.7	177.1	144.8	864	1046.7	939.8	1099.7
1435133_at	Ugcg	BF682223	0.614813	1.77967e-05	1.49512e-05	0.938356	5.65471	6.02619	138.1	97.3	149.1	111.9	123.2	95.4	113.2	134	810.6	702	587.7	706.7
1425442_at	Oscar	AF391160	0.0634664	0.00213871	0.00161263	0.789062	4.75234	6.02277	34.3	29.9	36.9	26.9	30.4	25.3	24.4	20.9	98.4	128.1	187.6	194.2
1429299_at	Ddah1	BE283964	0.594484	3.89961e-05	2.67845e-05	0.880478	5.30146	6.02112	14.4	25.9	22.4	12.6	21.3	19.6	14.9	10.5	85.3	91.9	106.5	115.5
1424278_a_at	Birc5	BC004702	0.257425	4.63197e-05	6.79804e-05	1.21433	7.30977	6.01958	79.4	75.3	69.5	87	86.9	71.1	88.9	131	461.7	526.1	610.9	676.1
1436074_at	Nfkbid	AW495632	0.882292	8.48173e-06	4.05757e-06	0.970223	5.83065	6.00959	40.1	56.5	42.8	21.8	40.8	46.9	35.8	32.9	244.1	248	248.7	199.1
1425477_x_at	H2-Ab1	M15848	0.0166282	1.23441e-05	8.55175e-06	0.783994	4.69201	5.98475	144.2	124.6	160.3	148.2	126.2	115.7	113.1	97.6	773.6	712.6	615	607.5
1439863_at	Ugcg	AI449585	0.0219627	0.00340455	0.00191819	0.636364	3.80225	5.97496	29.9	29.7	24.3	22.8	11.9	14.4	23.8	17.8	85.1	111.6	68.2	140.8
1420430_a_at	Ccdc159	NM_025977	0.704487	0.00295535	0.00537798	1.31148	7.82787	5.96875	0.7	6.1	3	2.4	1.5	10.3	2.1	2.1	12	27.6	24.7	31.2
1431856_a_at	C1qtnf6	AK012868	0.173706	5.62706e-07	6.84207e-07	1.1125	6.62629	5.95624	223.3	244.4	257.6	213.4	239.4	273.9	294.1	236.9	1434.7	1580.1	1497.7	1707.6
1430811_a_at	Nuf2	AK010351	0.364987	3.3333e-05	6.97311e-05	1.29935	7.7031	5.92844	23.2	38.7	26.7	34	42.3	29.2	24.5	63.3	206.9	217.7	230.7	289.1
1430353_at	Glis3	BB207363	0.487819	5.34751e-06	4.17889e-06	0.923949	5.47432	5.92491	44.3	28.7	38.7	38.2	34.7	30.6	32.8	40.4	226.3	219.7	181.8	192.8
1453214_at	Lrrc15	AK017350	0.0835125	0.000731103	0.00127552	1.73882	10.294	5.9201	33.7	54.6	36.9	42.5	57.2	66.1	114.8	53.5	256.7	532.4	498.8	438.4
1452242_at	Cep55	AK004655	0.753688	1.68186e-05	2.52988e-05	0.937643	5.54373	5.91241	31.6	35.6	26.5	37.8	29.9	20.5	25.9	47	149	182	198.1	199.9
1454694_a_at	Top2a	BM211413	0.377451	6.37241e-05	8.62147e-05	1.14384	6.76177	5.91149	104.7	117.9	117.8	126.8	134.1	112.2	106.6	181.5	628.9	738.1	847	945.1
1436659_at	Dclk1	BB757120	0.00853376	8.23923e-07	1.30612e-06	1.35989	8.02811	5.9035	220.5	188.7	191.6	192.5	283.8	267.8	303.6	223.6	1492	1779.3	1597.9	1499.5
1435331_at	Pyhin1	BM241008	0.0252455	0.00297479	0.00101149	0.552896	3.25946	5.89525	32.7	44.6	26.6	25.6	13.5	16	23.8	18.3	103.8	116.1	66.5	135.7
1419598_at	Ms4a6d	NM_026835	0.0482706	2.68298e-07	1.62208e-07	0.836269	4.92781	5.89261	202.2	159.7	205.8	181.7	151.5	174.8	145.2	155.2	893.9	945.9	864.8	988.3
1419537_at	Tcfec	NM_031198	0.417668	0.0001459	0.000112738	0.849427	4.98527	5.86898	22.8	37.5	37.3	24.6	30.9	21.1	32.9	18.9	123.4	151.6	144.7	189.5
1439510_at	Sgol1	BB410537	0.786484	0.00088029	0.000684248	0.906061	5.31515	5.86622	11.8	7.7	11.1	2.4	5.3	4.3	8.5	11.8	38.1	37.1	40.2	60
1460067_at	Ccr2	BB324415	0.132332	0.0051465	0.000964252	0.515534	3.02039	5.85876	33.9	6.9	34.1	28.1	10.4	14	7	21.7	78.1	106.2	68.2	58.6
1436723_at	Cenpi	BB258991	0.429631	5.74732e-06	1.35012e-05	1.43803	8.41453	5.85141	11.7	20.4	1.5	13.2	22.9	3.4	17.9	23.1	91.7	109.9	100.4	91.8
1443157_at	---	BB470847	0.893899	5.24577e-05	5.05798e-05	1.02477	5.99087	5.84606	46	33	48.1	26.3	32.2	48.2	31.3	45.5	183.9	234.4	272.1	228.6
1440921_at	Nlrp12	AI527293	0.755123	0.00369153	0.00351124	0.876238	5.11881	5.84181	4.4	8.3	15.4	12.3	10.5	16.6	4.5	3.8	69.8	57	28.1	51.9
1424208_at	Ptger4	BC011193	0.0158799	1.5813e-07	2.19773e-07	1.23518	7.2097	5.83694	224.9	190.8	202.7	189.9	249.6	261	270.9	216.9	1467.1	1559.2	1462.2	1339.1
1419182_at	Svep1	NM_022814	0.511542	7.13265e-05	7.32572e-05	1.04571	6.0982	5.83165	269.8	267.6	299.1	224.6	280.7	295.5	255.9	277.5	1376.6	1915.1	1383.2	1795.9
1446631_at	Gm14047	BB102620	0.427428	0.000100004	0.000949277	1.94444	11.3333	5.82857	1.9	0.9	0.8	1.8	1.2	7	1.6	0.7	18.1	15	11.2	16.9
1454623_at	Cpa2	BG141511	0.000684954	0.06467	0.00309482	0.28169	1.64185	5.82857	11.7	15.3	11.5	11.2	2.8	2.5	2.2	6.5	21.5	14.2	29.5	16.4
1427726_at	H2-D1	X03051	0.300538	0.000529141	1.08868e-05	0.568862	3.31437	5.82632	9.8	4.2	15.6	3.8	9.1	3.3	4.6	2	26.4	28.3	26.5	29.5
1444957_at	---	BG069110	0.121729	0.461239	0.00160585	0.231579	1.34737	5.81818	3	1.3	4.8	0.4	0.4	0.2	1.4	0.2	3.9	3.2	3.6	2.1
1417458_s_at	Cks2	NM_025415	0.0875265	8.75104e-06	1.30197e-05	1.24176	7.21638	5.81141	112.5	119.9	123.8	132.3	150.8	136.5	128.4	190.9	752.5	855.7	901.1	1015.9
1457231_at	---	BB409314	0.659676	2.54433e-06	9.57536e-07	0.923625	5.3609	5.8042	52.9	69.2	86.5	44.1	56.5	46.5	68	62.4	355.1	337.1	302.3	360.2
1426082_a_at	Slc16a4	BC025441	0.0297145	0.000550687	0.000352913	0.719588	4.1732	5.79943	27.5	20.2	25.9	23.4	13.6	19.7	15.3	21.2	76.8	99.3	96.7	132
1449171_at	Ttk	NM_009445	0.725276	6.91962e-05	6.35686e-05	1.11496	6.45984	5.79379	25	18.9	7.1	12.5	24.8	16.6	10	19.4	86.1	91.5	114.3	118.3
1428492_at	Glipr2	BM208214	0.166717	7.00153e-06	6.69776e-06	0.882317	5.10555	5.78652	82.6	77.9	79.2	90	85.6	72.4	74.3	58.6	358.8	459.5	453.9	411.1
1421075_s_at	Cyp7b1	NM_007825	0.921187	1.89858e-06	2.72969e-06	1.01821	5.87681	5.7717	53.8	45.8	33.1	54	37.8	57.9	34.5	59.9	277.6	305.1	250.5	264
1439995_at	Nhedc2	AV251613	0.497615	0.001385	0.00150013	1.05834	6.06335	5.72912	70	70.4	68.8	70.2	67.3	80.2	61.9	86.3	299.5	339.3	571	484.3
1421134_at	Areg	NM_009704	0.573823	0.000137971	0.000349041	1.4	8.00741	5.71958	3.3	6.9	2.5	0.8	3.4	9.5	0.6	5.4	26.9	25	33.8	22.4
1422955_at	Syt17	NM_138649	0.339678	0.00333107	0.00123631	0.590529	3.37604	5.71698	4.3	14.6	4.6	12.4	5.9	1.3	11.7	2.3	36.2	19.6	33.7	31.7
1453683_a_at	Cep55	AV126179	0.9035	0.000438337	0.000336015	0.910569	5.19512	5.70536	7.3	0.9	3.6	0.5	2.3	1	7.2	0.7	18.8	14.7	15.9	14.5
1425985_s_at	Masp1	AB049755	0.127357	7.58632e-05	3.92742e-05	0.767607	4.36898	5.69169	102.1	141.7	94.1	83.8	70.6	96.9	77.1	79.1	550.7	481.1	399.5	411.1
1426112_a_at	Cd72	BC003824	0.0107104	0.000271264	0.00010364	0.603041	3.43142	5.6902	82.9	78	80.8	54.3	32.1	50.1	52.4	43.9	313.1	223.9	265.6	213.1
1423774_a_at	Prc1	BC005475	0.420321	0.00243883	0.00485824	1.53746	8.72827	5.67706	21.1	33.7	20.9	24.4	25.3	18.8	25.8	84	152.7	206.6	185.3	329.1
1424927_at	Glipr1	BC025083	0.748127	5.39885e-06	4.73813e-06	1.043	5.91284	5.6691	96.3	89.2	58.7	97.7	90.4	105	84.9	76.3	476.9	527.5	449.4	567.8
1450496_a_at	Ska1	NM_025581	0.418953	0.00670824	0.00339695	0.686528	3.89119	5.66792	3.4	17.1	8.9	9.2	0.8	6.7	9.3	9.7	26.7	30.2	38.4	54.9
1426154_s_at	Mup1 /// Mup10 /// Mup2 /// Mup3	M27608	0.852141	0.00432132	0.00384797	1.09979	6.23283	5.66732	10	53.4	16.8	13	39.6	17	32.9	13	183	195.1	104.1	98.7
1428664_at	Vip	AK018599	0.0576342	0.108112	0.00591632	0.319392	1.80989	5.66667	1.5	9.4	7.4	8	1.5	4.2	0.5	2.2	5.3	14.7	13.3	14.3
1424270_at	Dclk1	AW105916	0.452047	0.000501726	0.000601995	1.13234	6.40695	5.65814	33.3	36	24.7	26.9	38.2	27.3	44.2	27.2	152.2	197.1	165.6	259.7
1422514_at	Aebp1	NM_009636	0.037945	5.06534e-06	3.44283e-06	0.830451	4.6864	5.6432	690	703.2	878.6	752.1	642	664.2	641.5	563.5	3130	3752.1	3375.4	3913.7
1423306_at	2010002N04Rik	BI963682	0.161008	2.55672e-06	2.81627e-06	1.07114	6.026	5.62578	135.9	137.6	153.8	142	155.1	161.3	154.9	138.5	754.3	925.4	826	924.9
1427391_a_at	Col12a1	AW412729	0.00967959	0.000194053	0.000250591	1.25357	7.04885	5.62302	205.5	217.6	220.8	203.6	226.3	285.8	283.1	267.2	1093.2	1408.6	1642.7	1829.4
1430076_at	Ccdc116	AK015290	0.36354	0.0118241	0.000377875	0.495327	2.78037	5.61321	8.3	10.6	0.7	1.8	0.6	6.4	1.4	2.2	14	16	17.3	12.2
1447286_at	---	BB749559	0.951389	0.00277099	0.00214413	1.03373	5.8	5.61072	20.3	2.5	16	2.7	15.8	12.5	12.8	1.8	80.4	66.6	56.7	37
1452954_at	Ube2c	AV162459	0.062257	1.89895e-05	2.67924e-05	1.26844	7.1014	5.59851	73.1	72.3	72.4	89.9	105.7	88.7	80.5	115.4	464.1	500.2	592.9	627.9
1416299_at	Shcbp1	NM_011369	0.429816	8.18495e-06	1.27918e-05	0.81883	4.57703	5.58972	41.6	39.7	23.4	35.5	34.3	25.2	13	42.3	148.2	155	154.7	183.8
1448226_at	Rrm2	NM_009104	0.608689	1.71897e-05	2.35292e-05	1.06442	5.93621	5.57692	81.1	77.8	75.5	80.7	82.9	60.7	85.6	106.2	378.2	471.5	500.3	520.5
1445399_at	Klrb1b	AV294178	7.95238e-05	0.000816318	0.000112545	0.42671	2.37785	5.57252	22.5	26	20.4	23.2	11.6	9.8	7.8	10.1	53.2	64.1	41.4	60.3
1440173_x_at	Selp	BB224329	0.347621	0.00141258	0.000955308	0.820384	4.56455	5.56392	108.3	89.4	95.3	45.5	72.2	64.5	84.8	56.2	244.6	440.6	374.9	485
1450200_s_at	Csf2rb /// Csf2rb2	NM_007780	0.377167	0.000318319	0.000361564	0.777149	4.31957	5.55822	48.9	32.6	48.5	46.8	28.7	49.2	49.8	9.7	208.4	200.9	133.7	220.7
1448383_at	Mmp14	NM_008608	0.00547637	1.16373e-06	1.48718e-06	1.27029	7.06024	5.55799	972.1	844.6	1075.7	949.1	1136.5	1232.8	1320.5	1190	6043.1	7075.3	6608.7	7394.8
1443749_x_at	Slc1a3	BB085413	0.303937	0.000107037	6.02755e-05	0.831238	4.61416	5.55096	71.8	68.1	105.9	56.4	52.9	72.2	63	63.1	310	424.6	300	359.8
1456280_at	Clspn	BG067086	0.187544	1.41501e-05	1.93018e-05	1.16163	6.4449	5.54814	33.1	28.6	28.5	32.3	28.9	35.8	33.8	43.8	177.3	177.8	202.1	232.3
1424921_at	Bst2	BC008532	0.354373	1.94052e-05	1.39065e-05	0.898836	4.98374	5.54466	157.5	121.2	105.1	114.4	101.9	120.1	104.4	121.4	734.8	608.9	580.5	558.7
1431834_a_at	Emilin1	AK020015	0.227001	0.000269102	0.00019283	0.847616	4.69949	5.54436	78.5	112.2	92	69.7	77.4	64.3	81.9	75.1	347.3	377.6	395.2	536
1434411_at	Col12a1	BB114398	0.0101011	8.84692e-06	1.11448e-05	1.20436	6.67366	5.54126	569.5	583.9	535.1	505.2	657.2	715.5	672.7	596.6	3136.5	3718.8	3562.9	4221.8
1456077_x_at	Cdc25c	BB209183	0.906448	0.00152487	0.000527009	0.935223	5.18219	5.54113	4.2	14.8	4.4	1.3	1.8	8.1	6.7	6.5	31.1	23.1	32.9	40.9
1424271_at	Dclk1	AW105916	0.2742	5.41564e-06	5.9656e-06	1.06664	5.90563	5.53666	200.6	191.9	197.4	170.9	209.1	198.6	221.1	182.7	1013.2	1250.3	1022.1	1207.4
1448380_at	Lgals3bp	NM_011150	0.119663	1.54902e-06	1.3937e-06	0.89968	4.95769	5.5105	315.4	303.8	323	274.9	275.1	307.4	268.8	243.7	1657.3	1532	1347.1	1497.6
1417281_a_at	Mmp23	NM_011985	0.258365	8.91887e-07	1.0616e-06	1.10054	6.06416	5.51018	166.5	130.5	153.7	143.1	182.8	175	150.7	145	808.4	943.9	879.4	969.2
1460156_at	Aoah	AV370401	0.571689	0.00876096	0.00549926	0.702703	3.86486	5.5	1.9	0.6	0.5	0.7	0.5	0.3	0.2	1.6	2.8	4	2.4	5.1
1423606_at	Postn	BI110565	4.8952e-05	1.80705e-08	3.27588e-08	1.79447	9.86684	5.49848	1208.1	1404.2	1116.6	1161.3	2231.4	2119.9	2371.7	2052.3	11852.2	12832.4	11595.2	11971
1417735_at	1810030J14Rik	NM_025470	0.0434918	0.464555	0.00133918	0.132867	0.727273	5.47368	3.5	6.8	3	1	0.6	0.3	0.9	0.1	1.8	3.1	2.3	3.2
1423693_at	Cela1	BC011218	0.196073	9.2217e-06	7.96014e-06	0.929888	5.07372	5.45627	64	59.9	69.1	56.6	56.6	61.8	55.8	57.9	352.7	327.5	265.8	320.4
1419358_at	Sorcs2	NM_030889	0.567367	1.57561e-05	1.74103e-05	1.06903	5.82518	5.44903	87.2	66.3	90.2	69.2	66.2	97.6	86.7	84	396.4	480	419.7	526.6
1429987_at	9930013L23Rik	AK018112	0.463742	1.38611e-05	1.10704e-05	0.935494	5.09627	5.44768	78.8	73	92.2	64.5	66.6	69	76.8	76.2	346.4	401.9	367.7	456.2
1438377_x_at	Slc13a3	BB497312	0.808651	0.000366432	0.000392695	1.04995	5.7139	5.44204	16.5	29.2	31.5	32.9	18.8	35.8	34.4	26.6	148	196.2	171.6	113.3
1418555_x_at	Spic	NM_011461	0.792375	0.000575571	0.000534197	0.869969	4.73375	5.44128	2.2	10	5.8	14.3	2.5	10.5	2.1	13	30.3	48	39.2	35.4
1427105_at	Cenpn	BM230253	0.239051	2.51489e-05	1.8957e-05	0.866178	4.70807	5.43545	62.7	44	50.5	61	49	38.4	46.8	54.8	210.6	252.6	284.1	280
1451246_s_at	Aurkb	BC003261	0.11584	0.00038022	0.000189212	0.547945	2.97603	5.43125	8.1	15.2	17	18.1	6.9	8.7	1.4	15	41.1	35.5	46	51.2
1449827_at	Acan	NM_007424	0.138294	0.00447969	0.00109895	0.598042	3.24435	5.42495	489.4	500.7	1139.9	557.1	396.2	436.3	426.5	348	1418.4	1988.9	2524.5	2786.1
1421618_at	Myo1f	NM_008660	0.543171	8.58087e-06	7.19146e-06	0.847567	4.59045	5.41603	58.1	28.3	62.7	68.7	68.4	52.9	37.2	26.1	234.1	246	238.2	281.5
1448321_at	Smoc1	NM_022316	0.506251	3.26288e-06	1.62883e-06	0.905518	4.90047	5.41179	389.9	256	328.3	234.5	293.8	317.9	246.4	236.4	1325.4	1473.3	1493.9	1630.6
1435773_at	4930547N16Rik	BM205349	0.143352	0.00203672	0.00410285	2.08734	11.2926	5.41004	7.2	8.8	5.8	1.1	16	3.7	18.4	9.7	50.7	44.3	69.2	94.4
1426045_at	Kng1	D84435	0.210326	0.000507455	0.000252119	0.624217	3.37578	5.40803	11.4	17.9	7.3	11.3	2	13.4	7.8	6.7	31.9	46	37.1	46.7
1427919_at	Srpx2	BC028307	0.194374	1.40729e-06	1.17862e-06	0.91432	4.94211	5.40523	199.6	192.9	233.9	197.6	185.2	197.8	202.1	168.3	913	988.9	1093.4	1077
1417911_at	Ccna2	X75483	0.714981	2.25996e-05	3.20633e-05	1.0541	5.682	5.39036	75	92.3	81.5	83.9	81.3	85	65.6	118.8	378.9	480.1	501.4	530
1458880_at	---	BG069393	0.065543	0.359664	0.000526431	0.252688	1.36022	5.38298	17.9	7.6	8.2	3.5	2.2	3.6	2.4	1.2	11.2	11.3	11.1	17
1450750_a_at	Nr4a2	NM_013613	0.0998892	1.8913e-05	1.37881e-05	0.846086	4.55391	5.38233	91.8	86.4	91.6	68.7	65.1	82.7	67.6	71	353.8	410.8	440.1	336.8
1453181_x_at	Plscr1	BF319989	0.576148	8.33504e-05	8.50653e-05	1.07209	5.76336	5.37579	38.1	24.3	28.6	26.9	31.6	37	30.1	27.7	146.1	182	145.7	205.7
1436920_at	Pcdh17	BQ176938	0.298908	7.77229e-05	3.63148e-05	0.815092	4.37186	5.36364	52.9	31.9	34.2	28.1	26.9	25.6	35.6	31.8	130.8	161.6	162	188.7
1417696_at	Soat1	BG064396	0.52566	2.55085e-07	1.66206e-07	0.943827	5.05741	5.3584	186.6	133.3	171.3	156.8	158.5	140	171.1	142	794.1	889.1	790	804
1423037_at	Aplnr	BB533323	0.67751	4.96855e-07	8.43293e-08	0.940284	5.03514	5.35491	129.8	128.9	171.7	90.4	115.5	129.9	136.1	108.2	638.6	668.5	620.6	694.6
1423775_s_at	Prc1	BC005475	0.680096	0.000162451	0.00017367	1.07715	5.7553	5.34307	60	89.8	56.9	95.3	99.7	76.7	58.1	90.8	333.1	398.2	506	500.8
1428575_at	Fcho1	AK014382	0.078033	0.250703	0.00104988	0.281525	1.50147	5.33333	8.9	16.5	3.8	4.9	2.1	3	1.9	2.6	12.8	8.8	12.3	17.3
1424254_at	Ifitm1	BC027285	0.399015	4.62352e-07	1.93973e-06	1.17609	6.2675	5.32911	199.2	205.7	266.7	248.4	283.3	381.3	225.8	191.6	1479.8	1565.2	1342	1379.1
1422016_a_at	Cenph	BC025084	0.0711599	1.83796e-05	3.78381e-05	2.3875	12.7188	5.32723	3.6	1.6	1.6	9.2	13.5	7.1	6	11.6	45.7	44.6	54.8	58.4
1437247_at	Fosl2 /// LOC634417	BM245170	0.967659	8.27137e-08	3.7015e-08	1.00471	5.35087	5.32578	571.3	377.3	516.6	424.1	441	463.1	434.3	559.8	2592.8	2592.9	2546.3	2377.4
1441858_at	---	BB315798	0.761958	6.86651e-05	8.69262e-05	0.94269	5.01228	5.317	50.9	34.8	40.7	44.6	35.3	33.6	31.3	61	235.3	249.5	173	199.3
1448594_at	Wisp1	NM_018865	0.0330186	4.43337e-05	3.62665e-05	0.878529	4.66892	5.31447	199.7	175.5	181	169.9	158.9	170.1	161.6	147.3	659.9	884.1	919.7	926.4
1450476_at	Cnr2	NM_009924	0.0636638	0.00304893	0.00179529	0.477903	2.53649	5.30753	23.8	23.5	28.2	21.8	1.8	20.2	2.7	21.8	77.5	50	47.1	72.2
1456377_x_at	Limd2	AV010467	0.0738924	1.31329e-06	1.21987e-06	0.83426	4.42145	5.29984	622.4	597.4	655.2	534.8	612.2	498.1	438.6	461.5	2688	2885	2380.3	2701.5
1433286_at	4833417J16Rik	AK014715	0.0194565	0.895204	0.00363081	0.197183	1.04225	5.28571	7.5	15.2	8	4.8	2.3	2.4	0.9	1.4	6.1	10.1	7.5	13.3
1429321_at	Rnf149	T12280	0.129508	1.70937e-09	5.0645e-08	1.23237	6.50656	5.27971	367.6	346.9	342.6	329.9	434.9	389.8	336	548.6	2273.6	2270.5	2165.7	2314.8
1455132_at	Rasal3	AV312663	0.047647	0.000393133	0.000142331	0.52967	2.7956	5.27801	16.9	27.2	27.7	19.2	3	16.7	11.2	17.3	60	75.7	51.9	66.8
1416515_at	Fscn1	NM_007984	0.358846	0.000461731	0.000396689	0.90417	4.76811	5.27346	37	37.1	36	26.6	29	35.4	33.2	26	134.9	187.1	127.9	201.9
1419219_at	Cyp4f18 /// LOC100044439	NM_024444	0.362374	0.000245804	0.000191122	0.882508	4.65235	5.27173	51.9	46.2	72.9	57.1	59.7	49	50.6	42	299.9	298.5	188.3	274.5
1440990_at	Kif26b	BB012037	0.983535	3.70328e-05	3.13285e-05	0.997175	5.24294	5.25779	42.7	41.9	29.7	27.3	36.3	28.5	37.3	39.1	152.4	214.4	178.3	197.3
1452881_at	Gins2	AW488914	0.171458	6.74598e-06	3.07176e-05	0.671538	3.52615	5.25086	25.8	33.9	34.4	35.9	30	35.1	7.1	15.1	105	106.3	124.4	122.7
1444173_at	---	BB798145	0.0171807	0.0273134	0.000712186	0.3137	1.64661	5.24898	26.3	11.5	18.9	21.4	3.2	2.8	4.3	14.2	31.4	25.9	30.7	40.6
1449049_at	Tlr1	AF316985	0.231385	0.000203156	9.63749e-05	0.751381	3.94268	5.24724	29	50.9	38.9	26	35.1	30.6	17.6	25.5	172.1	150.7	116.2	131.9
1451289_at	Dclk1	AW105916	0.153762	6.64519e-05	7.5549e-05	1.08458	5.6901	5.24635	151.5	150.5	139.9	145.7	171.3	158	168.3	139.7	685.4	980.4	749	928.7
1442804_at	Fgr	BB165085	0.00539253	1.88537e-06	1.19109e-06	0.771102	4.03545	5.23335	83.3	77.4	92.5	79.7	70.9	67.3	60.9	57.6	359.9	340.8	296.8	345.9
1456380_x_at	Cnn3 /// LOC100047856	BB490338	0.11516	0.0117535	0.00777243	0.740812	3.87618	5.23234	220.7	304.4	350.9	215.1	184.1	184.1	260.4	179.7	912.2	867.2	749.4	1700.5
1420081_s_at	D2Ertd750e	AU019491	0.735847	7.62636e-06	3.69809e-06	0.947873	4.95866	5.23135	40	58.3	34.2	34.4	35.9	42.5	35.2	44.6	189	189.7	223.1	225.8
1418216_at	Ggt5	NM_011820	0.200419	9.23101e-06	5.50304e-06	0.86235	4.50456	5.22358	129.5	104.3	96.2	87	88.9	100.5	80.9	89.3	541.5	436.9	465.4	434.6
1417910_at	Ccna2	X75483	0.691855	4.36115e-06	8.15037e-06	1.07309	5.60292	5.2213	86.6	112.3	94	124.4	116.8	79.9	96.2	154.9	517.2	562.8	601.8	656.3
1441910_x_at	Ccne1	BB293079	0.919024	6.65101e-05	3.80786e-05	1.02326	5.34022	5.21886	23	15.1	38.9	39.1	29.5	28.6	35.6	25.1	139.3	136.4	158.2	186.1
1442118_at	---	AW215795	0.246971	1.48028e-05	1.45807e-05	0.914682	4.77292	5.21812	128.2	136.4	139.5	129.2	134.1	112.5	138.1	103.1	627.9	730.8	538	648.7
1415899_at	Junb	NM_008416	0.0134123	3.7539e-06	8.88485e-07	0.674901	3.5131	5.20536	399.6	274.1	356.3	301.9	206.1	197	240.2	255.6	1172.9	1231.7	1230.4	1044.1
1448575_at	Il7r	AI573431	0.00080863	9.1582e-08	2.22544e-08	0.63909	3.32366	5.20061	47.6	54.7	47.5	56.9	34.3	31.4	29.1	37.3	177.4	165.5	177.1	167
1425414_at	Ppp1r16b	AF423761	0.56111	0.00938788	0.00647707	0.781818	4.06364	5.19767	4.4	3.4	1	2.2	0.8	2.4	1.6	3.8	13.2	11.7	5.1	14.7
1423996_a_at	Il4ra	AF000304	0.480229	0.000236801	0.00022658	1.16742	6.06094	5.19176	123.5	74.4	51.2	62.7	78.5	108.3	95.9	81.3	593.5	381.3	410.7	504.3
1419599_s_at	Ms4a6d	NM_026835	0.149814	1.64545e-06	1.07574e-06	0.894289	4.64192	5.19063	248.2	196.7	263	232.4	215.4	202.8	221.4	201.3	1135.8	1127.1	958.9	1143
1444527_at	---	BB818354	0.0175647	0.000142072	5.20981e-05	0.647679	3.36076	5.18893	9.1	12.1	14.5	11.7	8.2	6	7.4	9.1	31.2	42.8	45.4	39.9
1428304_at	Esco2	AK010391	0.0340323	0.00138815	0.00220672	1.68571	8.74286	5.18644	3.9	5.9	2.3	5.4	8.7	5.5	6.9	8.4	27.7	37.6	32.5	55.2
1424114_s_at	Lamb1-1	BG970109	0.0857715	9.6796e-06	1.39096e-05	1.20855	6.24902	5.17066	283.3	283.7	337.9	313.5	441	382.8	319.8	328.9	2061.7	1984.8	1557.1	2010.2
1429104_at	Limd2	AK012581	0.850747	1.43131e-06	1.22258e-06	0.975334	5.03783	5.16524	134.9	153.4	99	151.9	132.3	147	147.2	99.4	718	690.3	603.2	704.9
1424775_at	Oas1a	BC018470	0.000245016	8.25336e-06	2.78368e-06	0.625178	3.22898	5.16489	173.5	141.5	163.6	152.9	108.4	97.6	94.6	94.2	573.6	500.3	456.5	508.7
1426909_at	Uck2	BC004016	0.00221325	5.29681e-06	2.0571e-06	0.681091	3.51721	5.16407	157.3	154.4	122.4	141.3	108.6	97.5	97.7	88.1	454.1	519.6	489.5	560.6
1438364_x_at	Ang4	AV060923	0.437657	0.066412	0.000835305	0.473282	2.44275	5.16129	0.8	1.2	2	9.1	0.7	0.8	3.6	1.1	8.4	7.8	6	9.8
1423017_a_at	Il1rn	NM_031167	0.0828836	1.2152e-06	2.92176e-06	2.14601	11.0496	5.14891	17.5	1.3	6.4	11.1	20.3	19.5	10.2	27.9	92	103.2	99	106.9
1429295_s_at	Trip13	AK010336	0.706499	1.30594e-05	1.71652e-05	1.04966	5.39524	5.13997	56.7	44.1	47.9	44.6	49.6	46.5	41	65.8	217.3	255.3	282.1	288.2
1419309_at	Pdpn	NM_010329	0.0216148	5.55966e-07	4.33639e-07	0.841261	4.32192	5.13743	918.8	816.5	967.3	900.8	842.8	756.8	756.2	675.6	3999.7	4215.2	3656.9	3701.8
1435575_at	Kntc1	AW536884	0.642116	0.000123596	0.000338739	1.17744	6.04211	5.13155	12.3	18.9	16	19.3	17.3	14	10.5	36.5	104.3	73.5	117.6	106.4
1427298_at	Dnm3os	BB542096	0.15199	1.7176e-05	9.46677e-06	0.814229	4.1725	5.12448	172.9	119.1	187.3	146.2	154.5	121.6	121	112.2	546.3	657.9	691.5	714.2
1426955_at	Col18a1	D17546	0.234268	1.46102e-05	1.68416e-05	1.11613	5.71817	5.12323	308.9	297.2	372.1	282.5	378.2	390.4	308.8	329.7	1534.1	2070.1	1712.4	1892.3
1431591_s_at	Gm9706 /// Isg15	AK019325	0.0141739	4.65083e-07	1.67671e-07	0.714062	3.6557	5.11958	71.9	63.7	67.5	52.2	55.3	43.5	41.9	41.6	234.4	235	217.1	246.8
1421073_a_at	Ptger4	NM_008965	0.690111	3.16266e-06	3.1015e-06	1.07856	5.51627	5.11446	29.3	14.3	22.2	23.3	25.2	29.7	25	16.2	113.3	135.7	115.3	127.2
1456523_at	Gm2115	BB767153	0.819769	0.00165362	0.00162858	0.949153	4.84972	5.10952	28.9	23.1	21.9	14.6	13.6	22.4	17.3	30.7	72.8	92.1	121.7	142.6
1418796_at	Clec11a	NM_009131	0.146441	1.43807e-05	1.84731e-05	1.14651	5.85349	5.10547	317.1	384.7	351.5	384.8	453.2	462.6	381.3	351.7	1759.4	2310.4	2014.4	2333.7
1422864_at	Runx1	NM_009821	0.0156986	6.93833e-06	2.54931e-06	0.737486	3.7643	5.10424	436	387.9	354.3	302.1	266.9	267.5	294.7	262.6	1499.6	1240	1502.7	1330
1435409_at	Tmem26	AV226721	0.47788	0.000380882	0.000375087	1.14939	5.85808	5.09667	21.3	39.5	29.5	16.8	28.8	32.7	34.6	27	119	201.4	142.4	164.6
1451721_a_at	H2-Ab1	M15848	0.00741224	4.05231e-08	2.08685e-08	0.782734	3.98837	5.09544	324.8	303.2	368.5	319.4	269.2	240	283.9	236.9	1335	1353.9	1240.2	1319.2
1435288_at	Coro1a	BB740218	0.0192873	0.00165672	0.00055025	0.520799	2.65058	5.08946	12.5	18.1	16	13.5	13.3	5.7	7.3	5	52.9	37.4	34.6	34.4
1437514_at	B430306N03Rik	BB134165	0.666917	7.08077e-05	3.9371e-05	0.915578	4.6593	5.08891	20.3	18	36.7	24.5	23.7	23.7	17	26.7	117.9	126.3	91.4	128
1444556_at	---	BB223018	0.904879	0.00126918	0.000918163	1.04467	5.30928	5.08224	13.5	6.4	2.2	7	6.2	7.8	10.8	5.6	41.4	46.4	24	42.7
1456440_s_at	St8sia6	AV375081	0.61435	0.000741674	0.000679904	0.859223	4.36117	5.07571	38.6	22.1	20.3	22	36.2	24.1	12.4	15.8	83.5	106.1	113.1	146.5
1426755_at	Ckap4	BB312117	0.286687	1.58699e-05	1.05045e-05	0.890197	4.51017	5.06648	964.9	669.7	957	770.8	811.8	791.4	686.6	703.4	3238.1	3747.8	3847.2	4331.9
1419157_at	Sox4	AI428101	0.0149128	0.000314895	0.000240338	0.840598	4.24191	5.0463	87.4	75.4	82.8	75.6	68.6	70.6	60.4	70.4	259.1	361	317.1	425.3
1416686_at	Plod2	BC021352	0.751167	3.56841e-05	1.49879e-05	0.942781	4.75728	5.04601	980.3	435.4	687.4	591.8	620.7	687.6	601.9	630.5	3735.2	2911.3	3306.4	2867.5
1442590_at	Tnfrsf22 /// Tnfrsf23	BB366863	0.138665	3.43928e-06	1.44953e-06	0.748419	3.77516	5.04418	94.9	95	99.9	58	61.6	46.2	86.7	65.8	314.3	331.4	308.7	358.6
1458943_at	---	BB147698	0.215734	6.22728e-05	3.17123e-05	0.752727	3.79182	5.03744	23.5	38.6	25.3	22.6	22.5	11.3	25.3	23.7	117.3	90.1	95.2	114.5
1439604_at	Adamts16	AV319357	0.95175	8.10162e-05	0.000100655	0.988235	4.97326	5.03247	22.9	29.5	22.8	18.3	21.2	26.7	30.8	13.7	120.6	141	106.5	96.9
1449134_s_at	Spic	NM_011461	0.829055	0.0027148	0.00108703	0.885167	4.44976	5.02703	2.1	11.1	6.6	1.1	4	6.3	7.1	1.1	21	28.7	16.2	27.1
1450637_a_at	Aebp1	NM_009636	0.137441	8.79657e-07	8.37756e-07	0.86592	4.35233	5.02625	869.6	861.8	1046	971.1	734.6	871	946	694.3	3784.9	4332.1	3866.9	4330.8
1418666_at	Ptx3	NM_008987	0.962512	2.09045e-06	1.46075e-06	0.995977	5.00131	5.02151	268.2	257.7	190.9	277.5	241.7	240.4	264	244.2	1110.5	1318.5	1207.3	1336.5
1435330_at	Pyhin1	BM241008	0.000885228	0.000172887	6.75635e-05	0.633047	3.17838	5.02076	102.8	84.1	99.8	86.1	54	64.5	63.9	53.6	306.7	312	226.9	339.3
1431981_at	Hif1a	AK017853	0.809362	0.000239225	0.000214958	1.08	5.42095	5.0194	10.5	6	14.6	21.4	15.3	13.9	20	7.5	59	76	61.7	87.9
1450749_a_at	Nr4a2	NM_013613	0.18029	0.000676415	0.000311232	0.746399	3.74414	5.01627	124.8	91.4	76.8	61.1	69	78.6	66.5	50.2	292.1	430.3	332.5	270.9
1449195_s_at	Cxcl16	BC019961	0.79999	1.2197e-06	9.40031e-07	0.974852	4.88376	5.00974	99.5	75.8	104.4	110	109.6	95.9	89.7	84.7	519.9	481.1	432.4	469.8
1456179_at	Gm13212	BM228311	0.575099	0.00677951	0.0050749	0.732759	3.66954	5.00784	4	7.6	16	7.2	0.4	14.6	5.3	5.2	31.9	29.4	20.8	45.6
1421034_a_at	Il4ra	NM_010557	0.257151	3.69872e-05	3.00686e-05	1.2446	6.22851	5.00443	173.5	91.9	115.7	72.7	147.1	143	144.1	130.6	833.4	604.2	652.6	736.3
1455730_at	Dlgap5	BM250919	0.433646	0.000475635	0.000553935	1.32353	6.62316	5.00417	7.5	17.2	6	23.7	20.2	10.7	15.6	25.5	70.3	75.6	100.2	114.2
1420855_at	Eln	BB229377	0.86821	9.81197e-05	9.25704e-05	1.01633	5.08459	5.00289	559.4	402.9	454.2	389.8	504.6	430.9	471.6	428.7	2070.5	2829.8	1929.2	2354.8
1452431_s_at	H2-Aa	AF119253	0.0268602	7.04648e-07	3.0889e-07	0.808911	4.04577	5.0015	397.5	336.3	449.8	378.5	307	326.6	337.7	292.3	1721.6	1580.4	1489.7	1528.2
1417876_at	Fcgr1	AF143181	0.676937	2.28396e-05	1.50146e-05	0.924789	4.6199	4.99562	89.5	89.2	45.6	72.2	49.9	63.4	82.5	78.4	387.3	350.6	288.7	343.2
1419610_at	Ccr1	AV231648	0.872768	0.000622363	0.000564073	1.02978	5.12365	4.97546	37.5	18.1	32.6	22.6	33.8	26	30	24.3	145	180.2	97.6	144.9
1423171_at	Gpr88	BE947345	0.0779471	0.00123059	0.000258329	0.524664	2.60538	4.96581	10.6	6.7	15.7	11.6	9.2	6.3	1.2	6.7	33.7	28	22.4	32.1
1418569_at	Fblim1	BG070068	0.00279774	6.1546e-06	3.84019e-06	0.750813	3.72358	4.95939	62.6	58.1	66.7	58.6	52.3	40.5	46.6	45.3	205.9	217	236.3	256.8
1443977_at	E130014H10Rik	BB538930	0.0515117	3.23712e-05	1.44229e-05	0.703553	3.48909	4.95924	113.7	99.1	108.9	72.3	84.6	67.4	48.7	76.5	318.2	384.2	371.2	301.1
1421243_at	Rnf144a	AI414399	0.0858709	0.0882952	0.00155447	0.357834	1.77176	4.95135	14	1.9	16.6	19.2	1.6	3.4	7.4	6.1	20.5	15.8	30.1	25.2
1422139_at	Plau	NM_008873	0.414287	0.0012267	0.00181016	1.22371	6.05736	4.95	13.9	9.6	14.6	14.2	23.8	10.8	18.3	11.1	102.4	94.5	65.8	54.1
1450112_a_at	Gas2	NM_008087	0.414222	0.00147194	0.00166646	1.0895	5.3921	4.94915	69.5	55.6	62.5	70.5	67.7	59.9	67.4	86.2	258.4	455.1	262.6	415.6
1449207_a_at	Kif20a	NM_009004	0.56522	0.000163169	0.000302092	1.15988	5.73906	4.94798	20.6	14.3	14.7	16.7	21.9	9.3	16.9	28.8	73.3	86.1	108.3	112.8
1420704_at	Csf2ra /// LOC100045292	BM941868	0.349576	0.00128884	3.32447e-05	0.60367	2.9844	4.94377	37	16.6	47.8	7.6	16.4	29.8	16	3.6	85.3	85.8	76.4	77.8
1427023_at	Phyhipl	AI267048	0.220015	0.115541	0.000762608	0.375289	1.8545	4.94154	40.1	6.1	5.2	35.2	3.1	9.4	2.9	17.1	49.6	33.1	43.2	34.7
1460014_at	Treml4	BB740529	0.000682105	0.00858986	0.000828416	0.401891	1.98582	4.94118	12.2	9.2	9.6	11.3	5	4.7	5.1	2.2	17.8	21.5	16.5	28.2
1446558_at	Dennd4a	BB200185	0.00335543	0.000301092	3.14749e-05	0.511243	2.52513	4.9392	44.7	33.6	43.6	29.3	22.2	19.5	16.8	18.8	94.2	89	114.7	83.9
1431609_a_at	Acp5	AK008391	0.0362441	0.000363931	0.000479582	1.28019	6.31773	4.93498	850.3	661	868.2	620.2	1010.5	967.2	830.3	1032.2	3426.7	4231.7	5581.6	5711.3
1447621_s_at	Tmem173	AV300716	0.251097	3.36224e-07	1.96124e-07	0.899981	4.44039	4.93387	151.5	110.3	136.5	127.6	131.3	109.2	124.7	108.1	580.1	577.6	548.5	629
1450157_a_at	Hmmr	AF079222	0.352783	0.000314628	0.000344838	1.47157	7.25418	4.92955	13.8	2.1	3	11	6.8	16.2	11	10	41.7	56.8	50.1	68.3
1457127_at	Defb42	BB625617	0.0134354	0.380067	0.00446851	0.252336	1.24299	4.92593	11.9	15.4	6.8	8.7	1.4	1.4	6.7	1.3	10.3	9.7	18	15.2
1443560_at	Gm10941	BB283805	0.594593	0.00453672	0.00192007	0.787013	3.87532	4.92409	4.4	7.1	8	19	7.4	5.2	5.2	12.5	43.2	44.7	21.4	39.9
1415989_at	Vcam1	BB250384	0.023022	0.000229542	6.33474e-05	0.638284	3.14207	4.92269	168	176.5	171.7	103.9	99.3	116	81.9	98.6	399.5	571.6	448.3	529
1455000_at	Gpr68	BB538372	0.659578	5.55808e-05	4.07494e-05	0.914986	4.5036	4.92205	46.2	36.9	22.2	33.5	22.8	27.7	35.9	40.6	139	141.6	157.6	186.9
1450792_at	Tyrobp	NM_011662	0.2991	3.36575e-08	1.35245e-08	0.93012	4.57094	4.91436	1038	929.2	1212.2	1106.5	1054.7	957	1035.2	939.5	5004	4992.4	4628.3	4965.9
1422188_s_at	Tcrg-V2 /// Tcrg-V3	NM_011558	0.179549	0.00550651	0.00353139	0.729936	3.57834	4.90227	24	23.1	15.9	15.5	17.3	13	7.5	19.5	102.2	45.9	63.9	68.9
1417620_at	Rac2	NM_009008	0.693128	1.02051e-06	9.28898e-07	0.961379	4.70884	4.898	219.8	160.8	215.3	201.6	224.3	199	177.5	165.9	958	982.3	836.6	978.4
1418718_at	Cxcl16	BC019961	0.454443	9.28888e-08	5.09781e-08	1.10348	5.3908	4.88527	74.3	122.3	112.5	119	118.4	114.3	139.9	99.8	601.2	557.3	558.8	590.5
1451335_at	Plac8	AF263458	0.00527062	0.000210741	0.000141152	0.799384	3.90198	4.88123	234.9	245.4	282.8	243.8	212.8	207.3	191.6	193.2	1158.9	1120.3	834	815.7
1434046_at	AA467197	BG961961	0.0675737	7.60615e-05	1.29674e-05	0.632094	3.08317	4.87771	76.2	46.5	89.9	94	56	45.2	61.5	31.1	272.9	227.7	212.9	231.8
1451939_a_at	Srpx	AB028050	0.0298668	8.35967e-07	1.18744e-06	1.30529	6.35587	4.8693	83.6	103.8	111.5	82.7	137.9	136.3	110.4	113.5	555.8	626.8	580.9	661.9
1444233_at	Gpr132	BB208670	0.10086	3.59622e-05	7.66911e-06	0.711495	3.46131	4.86484	34.4	45.1	24.2	29.4	22.1	19.5	23.4	29.7	125.9	125.1	102	107.7
1447125_at	---	BE980833	0.959048	0.00435378	0.00442925	1.02459	4.98361	4.864	2.5	2.1	6	1.6	5.2	1.4	1.5	4.4	8.5	19.4	18.9	14
1424629_at	Brca1	U31625	0.45336	5.08767e-06	6.39102e-06	1.08879	5.29089	4.85944	18.2	25	20.1	22.3	19.4	23.8	21.8	28.2	113.3	100.4	128.7	110.5
1450424_a_at	Il18bp	AF110803	0.0554506	0.00121904	0.000393739	0.580438	2.81918	4.85698	26.8	50.7	37.1	40.8	28.3	28.5	8.4	25	117.6	133.8	80.1	106.6
1417697_at	Soat1	BG064396	0.185718	1.38257e-06	1.04377e-06	0.879193	4.26566	4.85179	137.9	127.6	142.5	107.7	130.5	101.4	119	102.5	504.2	596.3	527.9	571.4
1424011_at	Aqp9	BC024105	0.859719	4.62369e-05	5.07213e-05	1.08799	5.27793	4.85109	18.4	33.1	16.6	3.5	36	8.4	13.3	20.2	96.2	105.4	90.1	86.2
1451139_at	Slc39a4	BC023498	0.307117	1.52601e-05	5.19933e-05	0.741855	3.59649	4.84797	8.9	8	10.9	12.1	13.3	7.6	4.4	4.3	38.2	36.6	30.5	38.2
1416514_a_at	Fscn1	NM_007984	0.766723	1.54786e-06	1.5926e-06	1.01447	4.91158	4.84155	583.4	578.2	597.7	515.1	597.6	620.4	543.6	545.7	2492.3	2849.5	2766.2	3062.9
1427803_at	---	Y17678	0.0265003	0.208073	0.00819861	0.319202	1.54364	4.83594	8.3	7	8	16.8	2.3	2.3	4	4.2	10.4	16	11.4	24.1
1423520_at	Lmnb1	AA270173	0.914926	1.61383e-05	1.48433e-05	0.985745	4.76112	4.82997	74	54.6	48.8	54.1	59.3	43	59.9	66	279.4	316	235.4	271.4
1422013_at	Clec4a2	NM_011999	0.853186	5.28518e-05	5.58029e-05	1.01658	4.90014	4.82023	147	119.5	118.1	122.1	153.3	115.9	119.5	126.4	577.8	755.2	532	617.9
1459102_at	---	BG068811	0.425384	0.0230006	0.00131329	0.517647	2.49412	4.81818	1.3	5.1	1.2	0.9	0.5	3.1	0.5	0.3	5	4.6	5.5	6.1
1419513_a_at	Ect2	NM_007900	0.647297	0.00037366	0.000431718	1.06775	5.1365	4.81061	20.3	28.2	22.4	28	27.1	20.7	23.8	34	109.5	105.6	125.5	167.4
1416342_at	Tnc	NM_011607	0.917884	6.17511e-07	1.97807e-07	0.988663	4.75282	4.80732	1223.9	971.4	1168.6	764.3	1025	1096.4	1013.3	946.7	4611.7	4799	5295.5	4914.4
1438097_at	Rab20	BG066967	0.337137	5.06128e-05	9.67946e-06	0.811015	3.89633	4.80426	30.6	13.2	19.9	28.9	15.8	18.9	20	20.4	88.9	100.4	76.5	95
1434850_at	Iqgap3	BI083036	0.982605	4.77952e-05	4.30756e-05	0.996174	4.785	4.80338	41.8	29.6	22.6	36.7	35.4	29.4	24.5	40.9	129.2	152.7	159.9	183.6
1419647_a_at	Ier3	NM_133662	0.00315203	0.000217207	9.52985e-05	0.667366	3.20556	4.80331	560.1	484.7	634.2	560.7	351.7	347.6	348	447.4	1906.6	1781.3	2109.2	1382.4
1418061_at	Ltbp2	NM_013589	0.0242636	0.00094839	0.00019306	0.596184	2.86142	4.79957	751.7	439.2	864.9	664	409.8	424.6	431.2	355.9	1386.2	2075	2087.1	2234.2
1416782_s_at	Praf2	NM_138602	0.150617	3.21235e-06	3.07147e-06	0.900417	4.31846	4.79607	254.1	238.2	262.3	229.5	246.9	210.1	238.2	190.9	949.1	1016	1118.8	1165.9
1451655_at	Slfn8	BC024709	0.0984375	0.000410542	0.000145375	0.67753	3.24768	4.79342	93.3	51.2	86	61	66.3	53.8	38.2	39.2	261.8	241.2	176	267.7
1448205_at	Ccnb1	NM_007629	0.259064	0.000132644	0.000195878	1.28955	6.179	4.79161	54.6	51.5	35.3	74.8	69.9	54.7	57.5	96.7	262.5	315.5	344.9	413
1448713_at	Stat4	NM_011487	0.5465	0.0018266	0.00280222	1.44041	6.89637	4.78777	11.6	3.3	1.3	3.1	0.9	8.4	12.4	6.1	18.8	38.7	36.8	38.8
1419297_at	H2-Oa	NM_008206	0.000190307	6.06208e-05	5.80022e-06	0.482616	2.30712	4.78045	29.6	31.2	34.1	25.9	14.9	13.8	16.9	12.7	65.4	65.8	67.1	80.4
1449127_at	Selplg	NM_009151	0.0317906	7.20071e-06	3.89021e-06	0.79972	3.81488	4.77027	199.9	168.2	227.4	189.4	162.1	172.8	152.4	140.4	790.7	799.6	641.7	762.3
1418237_s_at	Col18a1	NM_009929	0.88311	2.94377e-05	2.87479e-05	1.01305	4.82973	4.76753	259.2	226.4	256.9	192.5	232.2	244.3	206	264.7	947.1	1226.5	1055.2	1287
1439377_x_at	Cdc20	BB041150	0.240091	4.336e-05	5.84511e-05	1.16226	5.53293	4.76047	122.1	117.1	115.3	152.7	163.4	138.8	114.4	172.9	580.3	654.8	741.5	829.7
1420097_at	D13Ertd787e	AU020421	0.478568	6.19463e-05	5.62356e-05	0.919529	4.37699	4.76004	258.4	230.5	219	183.1	168.5	253.8	194	203	830.1	1127.9	865.6	1076.3
1429868_at	1700020N01Rik	AK006179	0.108039	0.34995	0.000249595	0.28821	1.37118	4.75758	0.6	8.4	9.6	4.3	2	3.4	0.8	0.4	7.9	8.4	8.5	6.6
1421269_at	Ugcg	AA591863	0.179699	2.05003e-06	2.55487e-06	1.09174	5.19351	4.75711	112	107.8	111.1	97.5	111.7	120.1	105.1	130.8	562.8	578.5	484.4	599.2
1416741_at	Col5a1	AW744319	0.461488	1.16801e-06	1.08944e-06	1.05318	5.00976	4.75681	661.7	521.3	596.3	526.2	635.3	629	616.9	546.9	2574.6	2931.7	2924.7	3119
1436148_at	Tnr	BF456098	0.671717	0.0154905	0.00265988	0.677083	3.21875	4.75385	6.3	0.4	0.2	2.7	0.2	0.6	1.1	4.6	7	8.5	6.1	9.3
1417292_at	Ifi47	NM_008330	0.0388346	3.21263e-05	6.8875e-06	0.707768	3.36178	4.74983	114	126	85.8	79.7	74.7	73.8	71.9	66.6	370.4	346.3	287.2	359.3
1448254_at	Ptn	BC002064	0.00169919	0.000112073	0.000175018	1.45408	6.90047	4.7456	214.3	263.1	210.4	262.7	332.9	377.6	314.7	356.9	1308.7	1871.9	1437.3	1941
1440207_at	Lpcat4	BI155142	0.438646	1.64649e-05	2.08631e-05	1.251	5.93625	4.74522	10.7	11.4	20.4	7.7	13.1	13.1	13	23.6	63.7	73.1	77.9	83.3
1433928_a_at	LOC633178 /// LOC638236 /// Rpl13a	BF146301	0.0802359	3.31479e-08	3.66974e-08	0.898706	4.2634	4.74393	324.8	290	290.1	300.5	287.1	266.9	238.5	290.8	1243.2	1334.2	1235.1	1326.6
1439211_at	Umodl1	BG068098	0.171291	0.204967	0.000380484	0.341085	1.61628	4.73864	1.6	13.9	6	4.3	0.9	3.7	3.1	1.1	8.7	10	10	13
1439740_s_at	Uck2	AU018180	0.63455	1.86036e-06	2.00849e-06	0.947806	4.48907	4.73627	208.3	152	170.6	178	198.5	153.4	135.7	184.3	749.5	818.4	876.2	738.2
1424415_s_at	Spon1	BC020531	0.825014	0.000184705	0.000165555	1.02495	4.85169	4.73357	145.8	104.8	146.1	96.2	123.5	130.2	125.2	126.3	696.6	692	474.3	528.5
1424382_at	Rcn3	BC025602	0.997334	6.5985e-06	7.18833e-06	0.9998	4.73024	4.73118	718.9	740.5	806.7	734.3	832.3	798.6	682.9	686	3153.2	3408.8	3569.5	4061.1
1437804_at	Igfbp7	BE446893	0.231764	0.00286737	0.00375243	1.30392	6.1634	4.72682	9.1	10.6	4.4	6.5	11.8	11.3	7	9.8	46.2	70.1	37.8	34.5
1430574_at	Cdkn3	AK010426	0.571497	4.62668e-05	4.16757e-05	0.934066	4.4113	4.72269	29.4	26.2	34.9	36.9	36.2	25.5	26.1	31.2	114.9	134.5	151.5	161.1
1428105_at	Tpx2	AK011311	0.0664553	2.48504e-07	5.32033e-07	1.32526	6.25719	4.72146	14.7	13.9	17.2	20.3	24.1	17.9	19.5	26.1	95.7	108.4	101	108.5
1419132_at	Tlr2	NM_011905	0.163864	4.96229e-07	1.23684e-07	0.83651	3.94726	4.71873	179.1	195.2	262.8	197.2	195.1	166.3	189	147.5	850.3	793.6	784.8	864.5
1437355_at	Zcchc5	BQ126004	0.441538	0.000979037	0.00112484	1.27446	6.01359	4.71855	25.5	15.9	49.6	19.4	28	44.8	43.3	24.6	100.8	182.1	187.7	193.3
1448627_s_at	Pbk	NM_023209	0.362775	1.38018e-05	6.14358e-05	1.28551	6.05513	4.71031	63.5	61.7	68.8	79.9	72.3	70.6	63.2	146	351.1	399.4	429.8	478.2
1422828_at	Cd3d	NM_013487	0.285729	0.000558608	0.000162808	0.742898	3.4929	4.70172	19.3	22.9	20.9	7.3	9.2	11.7	15.3	16.1	76.5	62.7	56.1	50.6
1425086_a_at	Slamf6	AF248636	0.0474989	0.0180804	0.00329607	0.473958	2.22743	4.69963	20.8	11.4	14.7	10.7	8.8	0.9	9.5	8.1	30.7	45.2	21	31.4
1420854_at	Eln	BB229377	0.0223833	0.000168073	0.000259278	1.43655	6.74911	4.69815	74.3	83.4	93.9	56.5	114	127.7	110.2	90.7	457.8	641.1	408.8	571.7
1419135_at	Ltb	NM_008518	0.0427498	0.0016641	0.000408333	0.619246	2.90923	4.69803	121.7	112.4	91.1	59.3	66.1	62.2	49.7	60.1	365.2	278.3	218.9	256.2
1426754_x_at	Ckap4	BB312117	0.176684	9.59287e-06	5.73989e-06	0.880571	4.13431	4.69504	304.9	275.6	345.5	242.9	253.8	242.4	274.4	258.7	1045.2	1181.3	1264.2	1341.9
1422865_at	Runx1	NM_009821	0.00356317	8.67217e-08	3.96081e-08	0.738443	3.46671	4.69463	268.2	219.8	258.8	246.1	165.2	184.1	175.3	208.6	866	819.2	853.8	903.1
1420823_at	Sema4d	AV256403	0.253378	2.62948e-05	9.83477e-06	1.50198	7.0496	4.69353	20.5	20.7	5.1	4.1	16.1	24.3	19.1	16.2	87	84.3	81.3	102.7
1457824_at	Plscr1	AI504076	0.115837	0.000395452	0.000317836	0.684307	3.21168	4.69333	12.2	16.3	12.4	13.9	11.8	14.1	4.8	6.8	39.9	47.6	34.8	53.7
1433892_at	Spag5	BM208112	0.423523	0.000351766	0.00196427	1.73077	8.12088	4.69206	1.7	8.1	2.9	5.5	2.5	1.4	11.1	16.5	24.7	37.9	41.9	43.3
1452494_s_at	Slco1b2	AF250912	0.342868	0.0352519	0.000439247	0.505618	2.37079	4.68889	1.8	0.8	1.1	5.2	0.5	1.3	0.7	2	6.4	5.4	4	5.3
1416802_a_at	Cdca5	NM_026410	0.359088	1.61308e-05	5.74855e-05	1.24983	5.85891	4.68778	40.2	36.2	35	33.9	57.8	39.2	22.7	61.9	188.1	191	226	246.2
1448790_at	Sema6b	NM_013662	0.00366168	0.000202074	0.000120845	0.359976	1.6857	4.6828	46.3	40.7	37.5	41.9	8.8	31	13	7.1	76.7	68.6	72.8	62.4
1458308_at	Sbno2	BF148215	0.0195954	0.00144031	0.000765493	0.736206	3.43636	4.66766	132.1	100	127.8	95	84.1	85.3	81.5	84	322.7	498.8	294.4	447.3
1423570_at	Abcg1	AW413978	0.108865	3.01673e-05	1.6535e-05	0.826372	3.85271	4.66221	171.7	140.2	209.9	165.3	157.4	147.8	134.6	128	652.9	714.3	548.7	731.3
1444715_at	Asap3	AW539049	0.465404	0.000399906	6.4312e-05	0.783784	3.65203	4.65948	46.9	35.7	24.4	11.4	29.6	24.9	14.8	23.5	98.4	121.6	90.4	122
1421408_at	Igsf6	NM_030691	0.705962	5.2935e-06	3.41299e-06	1.07181	4.99396	4.65936	34.4	45.1	46.8	22.7	49.8	41.9	35.4	32.6	203.9	188.5	164.5	187.2
1458245_at	Susd1	BM198146	0.282644	0.00211237	0.000371357	0.635789	2.96211	4.65894	14.9	13.4	16.4	2.8	3.1	5.8	12.2	9.1	32.1	39.5	27.4	41.7
1425888_at	Klra17	AB033769	0.654703	0.000298735	4.15637e-05	0.847176	3.94684	4.65882	2.8	23.3	19.6	14.5	11.9	11.3	9.3	18.5	48.8	59.9	67.7	61.2
1419526_at	Fgr	NM_010208	0.0904869	6.88261e-07	9.76257e-07	0.770661	3.58884	4.65684	68	63.7	50	60.3	42.9	61.9	47.1	34.6	233.8	211.9	204.4	218.4
1425294_at	Slamf8	BC024587	0.485978	0.000655464	2.8726e-05	0.763602	3.54972	4.64865	11.7	2.4	17.5	21.7	11.6	8.8	11.3	9	47.9	50.2	52.9	38.2
1426652_at	LOC100045677 /// Mcm3	BI658327	0.600671	7.29277e-05	3.08778e-05	0.874457	4.06141	4.6445	66.7	25.6	40.1	51.6	43	24	51.4	42.5	161.6	174.1	197.1	214.5
1423813_at	Kif22	BC003427	0.662256	0.00131929	0.000694075	0.887464	4.11538	4.63724	16.6	9.7	14.9	29	18.5	12.2	16.6	15	52.5	71.3	69.9	95.2
1448191_at	Plk1	NM_011121	0.300665	8.99913e-05	0.000108505	1.21336	5.61578	4.62831	40	29.8	20.3	25.2	36.3	30.9	28.6	44.1	142.1	144.5	159.4	201.5
1425574_at	Epha3	M68513	0.135608	0.00193345	0.004133	1.95726	9.05556	4.62664	5.6	8.9	1.1	7.8	4	17	13.6	11.2	26.9	63.8	57.4	63.8
1426251_at	Cpz	AF356844	0.509745	0.000117805	8.20987e-05	1.2065	5.57517	4.62093	78.9	79.6	65	13.3	90	66.3	53.6	75.8	296.1	408.2	299.9	316
1460248_at	Cpxm2	AF017639	0.880665	0.000134789	0.000130151	0.9895	4.56719	4.61565	303.5	324	331.8	259.7	306.5	315.9	318.9	264.9	1446.7	1583.6	1025.8	1511.3
1423521_at	Lmnb1	AA270173	0.573394	4.57754e-06	4.57199e-06	1.04963	4.84238	4.6134	125.4	171.2	147.5	140.2	171	160.8	140.6	140.9	674.4	732.8	630.8	791.4
1455332_x_at	Fcgr2b	BM224327	0.676833	5.30221e-06	3.78869e-06	0.931844	4.29885	4.61327	268.1	253.3	192	343	283.1	244.5	170.4	286.4	1119.8	1247.1	1013.1	1161.3
1421837_at	Rps18	NM_138946	0.51379	0.00263047	0.00106177	0.650685	2.99829	4.60789	4.6	8.6	28.4	16.8	2.8	4.4	6	24.8	42.1	41.5	39.7	51.8
1415945_at	Mcm5	NM_008566	0.86931	0.000136655	0.000133498	0.976702	4.49155	4.59869	60.7	65.7	49.1	43.4	62.8	50.2	39.7	61.1	183.4	251.6	267.4	280.8
1449175_at	Gpr65	NM_008152	0.174885	0.000510185	0.000313781	0.772973	3.55315	4.59674	36.2	23.2	24	27.6	27	16.6	25.6	16.6	117.8	94	72.4	110.2
1421463_at	Siglece	AF329269	0.539791	0.000632485	0.000320849	0.726471	3.33824	4.59514	28.1	15.1	20.9	3.9	3.6	6.5	26.1	13.2	62.6	54.6	48.2	61.6
1418476_at	Crlf1	NM_018827	0.190418	9.76406e-05	5.07314e-05	0.819845	3.76502	4.59235	438.4	327.2	280.5	287.2	240.2	245.3	295.8	311.8	1028.8	1239.6	1261.8	1489.7
1452181_at	Ckap4	BB312117	0.0343446	2.61782e-05	1.42514e-05	0.784044	3.59848	4.58964	326.7	258	333.1	266.7	242.5	263.2	216.8	206.2	901.2	1145.6	1029.5	1186.1
1450141_at	Abcg3	NM_030239	0.0286627	0.000639156	0.000141807	0.629486	2.88555	4.58398	31.5	30.6	23.1	17.9	14	17.9	16.1	16.9	61.6	85.3	63.8	86.8
1452279_at	Cfp	BB800282	0.390979	2.15958e-05	3.30431e-05	1.1087	5.08123	4.58307	154.5	133.6	151	154.3	146.8	184.9	199.3	126.9	798.7	832.4	605.2	778.9
1422066_x_at	Klrb1b	AF342896	0.00119038	0.0538453	0.000458439	0.318091	1.45726	4.58125	13.5	16	10.5	10.3	5.2	2.8	3.1	4.9	16.1	21.1	13.9	22.2
1448593_at	Wisp1	NM_018865	0.374019	0.000168972	0.000114346	0.888876	4.06976	4.57855	268.7	213.3	198.1	161.3	200.2	193.6	158	196.1	644	858.9	948.8	972.6
1422790_at	Nppc	NM_010933	0.233992	0.0268543	0.00803127	0.615222	2.81395	4.57388	19.9	14.3	5.6	7.5	5.9	10.1	5.5	7.6	51.5	30.1	31.5	20
1431454_at	4930523O13Rik	AV267447	0.147327	0.735959	0.00229244	0.254545	1.16364	4.57143	1.3	3	1.1	0.1	0.2	0.4	0.7	0.1	2.1	1.1	1.5	1.7
1455099_at	Mogat2	BB414982	0.801654	0.00213005	0.000972699	0.879195	4.01846	4.57061	13	6.7	31.2	8.7	23.5	11.9	4.2	12.8	60.2	76.7	58.8	43.8
1419480_at	Sell	M36005	0.248667	0.000418942	0.000224444	0.744357	3.39843	4.56559	54.9	69.7	44.3	34.9	57	39.2	29.5	26	170.8	209.6	133.1	179.1
1420420_at	Hao1	NM_010403	0.133064	0.0222051	0.00466524	0.400612	1.82875	4.56489	6.8	8.7	12.6	4.6	0.7	10	1.7	0.7	12	18.6	13.6	15.6
1419816_s_at	Errfi1	AI788755	0.00256318	0.0230035	0.000388244	0.367525	1.67625	4.56093	1468.5	976.9	1611.3	1009.9	489.8	471	411.1	490.2	2354.7	1888.3	2644	1605.9
1442977_at	---	BG075843	0.00942496	9.54645e-06	5.87014e-06	0.783262	3.57083	4.55892	577.7	510.5	591.3	502.4	487.4	414.9	422.7	384	1821.7	2169.5	1741	2059
1444459_at	---	BB152209	0.535526	4.15422e-05	1.79677e-05	0.90371	4.11755	4.55627	73.8	60.8	69.2	36.1	61.1	54.5	48.8	52.4	236.1	213.4	287.3	251
1417090_at	Rcn1	NM_009037	0.669551	6.34804e-07	4.01137e-07	0.97061	4.41874	4.55254	375.3	366.8	335.7	283.2	344.9	340.8	310.1	325.2	1388.4	1483.4	1513.3	1628.8
1450234_at	Ms4a6c	AF237910	0.121385	3.62813e-06	2.5287e-06	0.897496	4.08225	4.54848	279	227.5	290.1	269.7	241.8	234.9	255.7	224.6	1132.1	1177.7	950.4	1092.7
1418641_at	Lcp2	BC006948	0.417708	3.59474e-06	3.07695e-06	0.925605	4.20846	4.54672	105.2	90.6	104	80.6	94.2	99.5	84.5	73.9	416.9	371.3	369.7	443
1423590_at	Napsa	AW105774	0.000591731	0.000111835	3.78422e-05	0.642589	2.91959	4.54348	81.9	68.8	76.5	66.3	51	43.3	45.2	49.1	191.5	213.9	193.6	257.9
1421211_a_at	Ciita	AF042158	0.00359122	0.000148771	2.77453e-05	0.556856	2.52926	4.54204	35.8	25.3	31	27.5	12.3	15.7	20.2	18.4	79.4	80.6	61	81.5
1421992_a_at	Igfbp4	NM_010517	0.0155251	4.5916e-08	5.23935e-08	1.08159	4.9107	4.54028	1306.7	1377.3	1391	1305.8	1449.8	1523.6	1421.8	1424.6	6342.6	6854.4	6333.9	6892.6
1429758_at	1700017B05Rik	BB046208	0.0597021	5.56777e-05	3.12086e-05	0.793963	3.60365	4.53881	131.3	117.3	166.4	138.3	102.3	106.8	100.7	129.5	573	407.4	513.3	500.2
1435940_at	Dclk1	BM232314	0.352261	1.01517e-05	1.41394e-06	1.3125	5.95519	4.53729	37.4	23.5	15.1	8.8	32.7	24	30.5	24.1	114.5	134.2	122.8	133.5
1417925_at	Ccl22	BC012658	0.00654951	0.000248637	9.9801e-05	0.371951	1.6875	4.53689	17.4	15.3	13.7	19.2	12.6	3.6	5.3	2.9	25.9	26.7	29.5	28.6
1420603_s_at	Raet1a /// Raet1b /// Raet1c /// Raet1d /// Raet1e	NM_009016	0.0238983	4.56501e-05	3.67005e-06	0.607122	2.75131	4.53173	49.4	29.1	51.2	41.6	31.3	19.6	25.2	27.9	113.5	115.1	109.8	132.9
1421304_at	Klra2	NM_008462	0.814781	0.00105498	0.0011566	1.09137	4.94416	4.53023	8.3	3.6	2.2	5.6	6.2	4.2	8.5	2.6	26.1	22.4	31.6	17.3
1421186_at	Ccr2	BB148128	0.0224161	0.000109356	7.1511e-05	0.764328	3.458	4.52424	193.5	183.7	220.2	212.2	166.6	132.4	186.3	133.5	851.1	619.3	617.3	711.9
1428827_at	Whsc1	AK017992	0.315812	2.14277e-06	1.30914e-06	0.89373	4.04304	4.52378	57.4	44	46.5	40.3	43.4	34.1	46.2	44.5	178.7	176.7	202.4	203.1
1450863_a_at	Dclk1	BQ174703	0.619601	0.000139099	0.000154922	1.08417	4.90281	4.52218	18.5	32.2	26.3	22.8	25.5	32.7	30	20	116.8	143	93.8	135.7
1428572_at	Basp1 /// LOC100045716	AK011545	0.870256	1.31172e-07	4.20327e-08	1.0142	4.5841	4.51992	265	233.5	237.4	179.7	231.8	234.9	247.3	214.6	1020	1101.7	1002.7	1072.8
1447363_s_at	Bub1b	AU045529	0.499003	3.95324e-06	0.000118898	1.31953	5.95435	4.51249	31.5	21.4	33.9	31.5	61.6	19.2	14.5	60.8	155.8	168.4	184.4	195.8
1420349_at	Ptgfr	NM_008966	0.860382	1.03494e-06	1.1473e-06	0.991012	4.47086	4.51141	82.6	88.4	82.9	91	93.4	86.6	86.2	75.6	381.5	413.4	345.5	401.6
1429756_at	4931428F04Rik	AK016481	0.476252	0.00568186	0.00232175	0.695652	3.13587	4.50781	1.7	2.7	7.2	6.8	6.4	0.7	2.4	3.3	16.4	11.7	10.9	18.7
1448878_at	Mxd3	NM_053213	0.372366	8.73334e-05	6.11277e-05	0.848485	3.82284	4.50549	22.4	21.6	14.9	26.9	21.1	18.3	11.7	21.7	72	90.6	71.3	94.1
1460437_at	Cyth4	AK010908	0.187496	0.000228011	0.000115962	0.804324	3.62347	4.50499	167.1	109.7	201.5	169.2	140.2	150.8	121.1	108.7	657.5	567.9	450.6	670.2
1451691_at	Ednra	BC008277	0.481762	2.15633e-06	1.99257e-06	0.912702	4.11132	4.50455	52.6	51.9	66.2	45.8	55.9	53.9	52	35.8	243.9	220.4	202.2	223.6
1452314_at	Kif11	BB827235	0.107049	3.10689e-05	1.92182e-05	0.810526	3.65101	4.5045	31.7	33.9	24	33.9	19.3	28.5	25.5	26.8	99	105.4	115.6	130.9
1418334_at	Dbf4	NM_013726	0.818353	6.07895e-06	6.95795e-06	0.977965	4.40385	4.50307	61.2	65.9	54	68.5	54.6	55.8	58.6	75.1	244	260.3	288	306.9
1425016_at	Ephb2	AV221401	0.684182	2.58994e-07	1.96879e-06	0.925435	4.16321	4.49866	33.5	22.9	33.1	31.2	32	35.9	29.2	14.6	120.4	133.7	123.1	125.3
1424128_x_at	Aurkb	BC003261	0.897364	0.000229984	0.000353087	1.027	4.62006	4.49859	21.5	28.6	25.5	28.1	25.5	18.4	21.8	40.8	91.9	113.3	125	148.9
1439349_at	Sbno2	BM239721	0.877941	0.00277026	0.00261482	0.983877	4.42546	4.49798	162.1	104.7	122.8	137.6	115.9	127.7	134	141.1	497.7	778.7	371.1	685.6
1431843_a_at	Nfkbie	AK011965	0.149973	1.61415e-07	1.45821e-08	0.830309	3.73124	4.4938	41	50.9	62.8	49.2	48.8	40.4	44	36.1	196.5	186.9	191.5	185.9
1421285_at	Pik3ap1	NM_031376	0.00698362	0.0109263	0.00168633	0.452381	2.02948	4.48622	26.8	22.8	19.1	19.5	9.1	3.6	14.7	12.5	43.9	58.6	29.5	47
1428259_at	Pxdn	AK010185	0.0427518	8.38168e-07	1.05324e-06	1.17818	5.28524	4.48593	499.7	413.8	493	418.6	546.9	584.9	538.3	480.2	2186.4	2565.8	2337.2	2556.7
1452004_at	Calca	AF330212	0.383314	0.0452047	0.000424905	0.509615	2.28526	4.48428	11.7	1.9	16.5	1.1	1.5	1.2	7	6.2	19.1	15.2	16.3	20.7
1422430_at	Fignl1	NM_021891	0.658156	0.000102126	5.4023e-05	0.921826	4.13196	4.48236	36.6	34.4	30.8	58.1	43.2	36.7	30.1	37.4	153.8	144.4	200.8	161.7
1451426_at	Dhx58	AF316999	0.51491	0.000527019	0.000253916	0.829268	3.71405	4.4787	39.7	16.8	22	40.4	13.2	24.8	32.6	28	125.7	117.5	79.8	118.6
1421424_a_at	Anpep	NM_008486	0.36088	1.82171e-07	1.19698e-07	0.923343	4.13257	4.47566	237.3	231.6	297.9	245.5	245.2	263	215.9	210.6	1061	1044.1	978	1100.3
1423909_at	Tmem176a	BC010831	0.584665	1.96175e-07	5.08409e-08	0.947635	4.23761	4.47178	376.7	310.2	427.7	306.2	344.2	366.4	336.1	299.7	1496.7	1582	1424.3	1517.8
1429924_at	1700019O17Rik	AK006136	0.758026	0.000441967	0.000346882	1.09396	4.88591	4.46626	6.1	4.2	2.8	1.8	3.2	5.7	3.6	3.8	17.8	23.5	16.6	14.9
1448160_at	Lcp1	NM_008879	0.36958	2.00011e-06	2.06171e-06	0.940366	4.19397	4.45994	368.2	337.6	367	320.7	369.1	337.9	320.6	282.8	1476.9	1546.6	1283.1	1537.7
1457980_x_at	Uck2	BB245119	0.704937	0.000176429	9.9326e-05	0.924731	4.12283	4.45841	86.7	60.8	37	57.3	58.2	47.8	47.9	69.7	188	263.3	268.3	277.3
1449994_at	Epgn	NM_053087	0.776031	0.00981072	0.00549705	0.864143	3.85078	4.45619	20.8	15.5	1.3	7.3	15.3	10.5	2.1	10.9	60.2	50.9	28.5	33.3
1428790_at	Nfam1	AV231045	0.0565015	0.000470223	0.000193211	0.666334	2.96608	4.45135	42.1	41.8	53.4	63.2	36.3	41	19	37.3	122.9	153.1	134.4	184.3
1447063_at	1700017B05Rik	BB273020	0.0193593	0.000112116	9.93079e-06	0.617908	2.74751	4.44648	103.8	77.9	118.8	71.4	54.4	55.2	58.8	61.4	273.4	220.2	284.2	244
1421349_x_at	Cend1	NM_021316	0.578953	0.00623073	0.0016185	0.721649	3.20619	4.44286	2.6	5	1.4	0.7	1.4	3.7	1	0.9	9.2	8.7	8	5.2
1417244_a_at	Irf7	NM_016850	0.438429	0.000318999	0.00029592	0.941134	4.18025	4.44172	114.6	95.4	99	102.1	109.5	98.1	80.6	98.7	536.6	388.3	333.3	460.3
1450663_at	Thbs2	NM_011581	0.517063	1.08398e-07	3.01634e-08	1.06973	4.74844	4.43892	768.7	558.8	568.1	528.1	654.4	645.9	713.2	579.2	2925.3	2947.5	2712	2924
1460292_a_at	Smarca1	NM_053123	0.114717	1.98967e-06	2.02739e-06	0.818534	3.63242	4.43771	71.1	70.2	60.2	56.4	46.7	67.9	51.1	45.4	221.7	221.6	234.6	258.9
1420788_at	Klrg1	NM_016970	0.0244139	1.17718e-05	5.9292e-06	0.727273	3.22684	4.4369	26.3	28	34.4	26.8	24	15.7	23	21.3	88	106.4	87	91.3
1421443_at	Gpr110	NM_133776	0.121134	0.784481	0.00537551	0.196	0.868	4.42857	1.5	10.6	1.5	11.4	0.3	0.8	2.4	1.4	3.1	6	5.3	7.3
1421201_a_at	Tro	AF241244	0.483393	0.000826151	0.00287665	1.6587	7.34471	4.42798	3.3	5.7	2.7	17.6	3.3	24.9	2.9	17.5	37.8	51	70	56.4
1438767_at	Osm	BB237825	0.16653	0.00102866	0.000781948	0.653137	2.89053	4.42561	48	36	31	47.6	18.6	9.7	32.2	45.7	135.2	100	141.7	93.1
1415983_at	Lcp1	NM_008879	0.267293	3.1368e-06	3.31223e-06	0.909263	4.02366	4.42519	597.7	523.9	626.2	572.1	626.8	518.7	517.2	446.7	2310	2382.5	2069.7	2572.3
1453514_at	Gpm6b	AK020224	0.00253325	0.00064332	0.000315115	0.706817	3.12673	4.42367	59.8	53.3	66.5	59.5	48.7	41.3	38	41	132.1	212.4	216.6	186.5
1450625_at	Col5a2	AV229424	0.400612	1.54333e-07	2.94954e-07	1.06732	4.71953	4.42187	1239.4	1074.3	1196.5	1139.5	1430.2	1241.1	1246.9	1044.5	5249	5931.6	5328	5435.8
1422814_at	Aspm	NM_009791	0.480281	3.91881e-05	6.09902e-05	1.16232	5.12731	4.41128	33	40.8	30	53.3	40	35.8	41.4	65.4	164.9	194.1	216.7	229.8
1440165_at	Ptprc	BB140726	0.813255	0.000658611	0.000518623	0.964489	4.25284	4.40943	23.7	17.9	12	16.8	15.1	18.3	16.2	18.3	77.4	88.3	50.1	83.6
1437595_at	E030010A14Rik	BB531414	0.870116	5.34522e-05	5.38184e-05	1.08014	4.76132	4.40806	19	7	25.7	5.7	10.1	28	17.2	6.7	68.6	73.7	68.3	62.7
1418580_at	Rtp4	BC024872	0.000413505	0.000290649	0.000142915	0.716335	3.15404	4.40302	246.2	245.9	229.3	212.8	178	159.9	173.7	157.6	791.1	822.4	537.9	795.1
1452779_at	Ube2ql1	AK014009	0.409774	8.20325e-06	1.01612e-05	1.20248	5.29068	4.39979	18.4	21.1	12.5	28.5	29.3	15.5	28.6	23.4	96.7	98.5	117.1	113.6
1434437_x_at	Rrm2	AV301324	0.097679	5.98211e-06	9.68102e-06	1.21645	5.35157	4.39933	196.3	208.5	204.4	251.5	293	218.4	236.1	299.5	996.6	1170.2	1140.4	1298.9
1453107_s_at	4933413G19Rik /// Foxm1 /// Pebp1	AK008037	0.373821	7.97458e-05	0.000105093	1.13514	4.9906	4.39648	18.4	26.6	20	20.1	29.2	26.1	18	23.3	96.3	100.9	95.2	132.3
1423602_at	Traf1	BG064103	0.0976842	5.5817e-06	6.43233e-08	0.732177	3.21484	4.39079	20.3	20.9	34.8	27.8	21.6	16.8	18.9	18.7	80.6	87.8	80.5	84.8
1449531_at	Leprel2	BC003726	0.263824	1.35223e-06	7.70587e-07	0.882447	3.87293	4.38886	287.6	255.1	338.5	243.4	257	290.5	222.7	222.2	1054.3	1164.4	1003.6	1133.2
1434667_at	Col8a2	BG229308	0.124438	6.17948e-06	7.23578e-06	1.1151	4.88759	4.38308	387.6	367.8	443.9	361.9	462.9	447.8	444	386.2	1753.5	1836	1834.8	2206.2
1459750_s_at	Gpr123	AU015577	0.359032	0.00234443	0.00656181	2.15556	9.44444	4.38144	0.5	0.8	6.9	0.8	0.7	3.1	10.6	5	29.7	22.1	13	20.2
1441662_at	Cyp4x1	BB171122	0.13667	0.498867	0.00225707	0.298319	1.30672	4.38028	10.8	1.6	9.1	2.3	1	3.3	2.4	0.4	5.2	9.3	7.3	9.3
1439204_at	Scn3a	BB096886	0.977467	0.000163832	0.000367515	0.985714	4.31429	4.37681	5.3	0.7	3.1	4.9	2.1	6.7	4.4	0.6	17.1	16	12.9	14.4
1427168_a_at	Col14a1	AJ131395	0.0678824	4.16413e-05	5.054e-05	1.17066	5.11774	4.37169	708.8	877.5	978.6	868.9	1037.6	1032.1	1049.9	900.2	3906.5	5276.3	3876.2	4514.3
1433899_x_at	Tsc22d1	AU016382	0.980462	9.02042e-05	4.50898e-05	0.994262	4.33992	4.36496	880.3	430.3	474.7	427.9	538.5	507.7	438.8	715.5	2770.2	2113.3	2598.2	2123.4
1435903_at	Cd300a	AI536469	0.108927	0.000227654	0.000130418	0.820216	3.57983	4.36449	151.7	107.8	128.3	103.9	111.1	95.9	103.8	92.5	428.5	487.8	335	508.9
1421739_a_at	Matk	NM_010768	0.890233	0.000124755	7.87746e-05	1.04803	4.56775	4.35843	16	8	9.4	24.9	16.9	21.5	15.4	7.3	59.9	57.9	72.1	76.4
1459556_at	---	BG069908	0.662652	0.000601393	0.000998344	1.22222	5.32479	4.35664	6.5	4.3	2	10.6	9.1	1.6	6.2	11.7	33.9	24.6	26.7	39.4
1424971_at	Ccdc99	BC006674	0.614715	0.000270928	0.00047838	1.24644	5.42566	4.35294	14.7	11.9	20.1	2.4	19.6	2.8	22.3	16.5	75.3	49.7	65.5	75.9
1440196_at	---	BB207611	0.413865	2.63976e-06	5.89829e-07	0.8842	3.84432	4.34779	115.3	96.3	165.2	142.2	95.9	118.5	134.4	110.1	524.2	483.8	462.1	525.1
1424339_at	Oasl1	AB067533	0.302589	0.000195687	3.00422e-05	0.733088	3.18603	4.34604	47	44.7	23.4	20.9	32.7	26.1	13.1	27.8	122.3	99.5	96.6	114.9
1417314_at	Cfb	NM_008198	0.00105763	9.39068e-07	1.75049e-06	1.57776	6.84988	4.34153	168.2	216.9	162.5	174.5	268.6	300.7	311.5	258.5	1262	1359.1	1117	1208.2
1418184_at	Cenpm	NM_025639	0.351992	6.87457e-05	6.00709e-05	0.857143	3.71921	4.33908	38.3	29.6	26.9	27	29.7	27.6	16.2	30.9	95.7	103.7	123.6	130
1420905_at	Il17ra	AK010040	0.063195	2.01978e-05	6.88811e-06	0.786754	3.41323	4.33836	287	208.6	292	215	196.1	186.3	189.8	216.6	967.1	855.3	746.4	853.3
1443687_x_at	H2-DMb2	BB734586	0.000163717	0.0153652	0.00370336	0.531125	2.30229	4.33474	95.8	87.6	108	110.2	52.4	49.1	53.3	58.5	167.2	342.9	217	197.5
1442280_at	D2Ertd750e	BM251033	0.0964763	0.000379452	0.000305423	0.754613	3.26753	4.33007	14.7	12.9	13.7	12.9	11.4	8.9	6.5	14.1	34.3	47.8	40.9	54.1
1449123_at	Itih3	NM_008407	0.934526	0.0134457	0.00837893	0.955128	4.12821	4.32215	8.6	1.1	1.2	4.7	1.5	6.4	3.4	3.6	23.4	16.5	16	8.5
1452458_s_at	Ppil5	BC022648	0.591073	8.70416e-05	0.000289714	1.2275	5.3025	4.31976	9.2	13.5	4.7	12.6	8.4	9.2	8.8	22.7	45.8	53.4	48.3	64.6
1432227_at	---	AK010638	0.0750267	1	0.000320876	0.231707	1	4.31579	4.2	12.7	5	19.1	5.3	0.6	1.9	1.7	10.2	9.7	9.9	11.2
1422932_a_at	Vav1	NM_011691	0.496511	0.000339101	0.000322572	0.867138	3.74057	4.31369	37	37.7	23.7	28.8	40.9	28	20.3	21.1	143.1	106.9	93.2	132.6
1425380_at	Rasgrp4	AF331457	0.591375	0.00160909	0.000708659	0.792094	3.41435	4.31054	6.9	11.4	28.3	21.7	15.9	23.5	9.1	5.6	68.3	66.6	43.2	55.1
1448899_s_at	Rad51ap1	BC003738	0.47369	0.000180789	0.000204856	0.903818	3.89574	4.31032	33.8	36.4	33.5	32.5	39.7	31.9	19.4	32.1	101.4	150	126.1	153.1
1436598_at	Icos	AV313923	0.221858	4.2592e-05	0.000177561	0.668363	2.88041	4.30964	31	36.6	23.7	26.6	17.1	27.8	31.7	2.2	78.7	83.2	97.9	79.8
1420699_at	Clec7a	NM_020008	0.468104	2.29422e-05	2.26405e-05	0.955103	4.11234	4.30565	236.5	240.5	266.6	258.7	255.9	246.8	252.7	201.9	1096.2	1177.9	882.3	965.4
1450136_at	Cd38	NM_007646	0.55534	0.000709531	0.000522722	0.918622	3.95455	4.30487	40.3	41.3	31	23.8	30.4	27.2	34.3	33.4	133.9	150.4	92.5	162.6
1421187_at	Ccr2	BB148128	0.0363836	1.72352e-05	7.81141e-06	0.72046	3.10143	4.30479	66.1	78	59.5	83.3	62.4	51	55.3	38	239.4	213.5	195.7	241.2
1451268_at	Tram1l1	BC027120	0.249183	0.000385752	0.000541176	1.47445	6.34307	4.30198	7.5	9.7	1	9.2	10.9	7.4	14.2	7.9	30.3	51.2	42.9	49.4
1416310_at	Nusap1	BC009096	0.036728	0.0757977	0.00576097	0.401051	1.72504	4.30131	10.1	11.9	13.4	21.7	1.3	10.2	7.1	4.3	13.4	30.4	31	23.7
1417836_at	Gpx7	NM_024198	0.103852	3.78069e-05	2.26553e-05	0.849522	3.64837	4.29462	504.7	427.4	597.4	562.5	463.5	420.9	483.5	409.3	1649	1818.8	1930.7	2233.9
1435277_x_at	LOC100046344 /// LOC100047753 /// Nme1	AV156640	0.337037	5.60418e-05	4.72692e-05	0.902905	3.87399	4.29058	358.3	303.3	372.5	415	326.2	261.7	340.4	380.1	1637.2	1498.5	1286.4	1191.7
1421044_at	Mrc2	BB528408	0.0181347	0.000637086	0.000243683	0.677952	2.90693	4.28782	160.4	131.4	185.1	134.5	108.5	126.2	89.6	90.2	391.2	391.6	422.7	571.8
1416687_at	Plod2	BC021352	0.464332	7.45874e-05	2.80531e-05	0.887861	3.80573	4.28641	1354.9	684.8	1013.8	891.6	840.1	858.7	924.8	879.1	4396.1	3249.6	3897.9	3470.4
1438248_at	Pcsk5	BB041089	0.0146421	0.00496718	0.00242318	0.684076	2.93121	4.28492	21.6	20.2	16.2	20.5	9.8	16.6	13.8	13.5	56.2	49.2	42.5	82.2
1435005_at	Cenpe	BG916502	0.433907	0.000557961	0.000776471	1.14163	4.88155	4.27594	26.5	31.6	24.5	33.9	40.4	26.6	24.7	41.3	120	119.4	138.3	191
1421645_at	9930013L23Rik	NM_030728	0.0510806	0.000465795	4.05939e-05	0.60473	2.58277	4.27095	26.5	42.8	25.2	23.9	20.2	19.8	19.3	12.3	66.6	77	90.6	71.6
1422259_a_at	Ccr5	X94151	0.092313	0.000188659	4.732e-05	0.68004	2.90441	4.27094	40.8	62.6	37.3	61.2	44.8	29.2	38.8	24.5	168.1	158.4	129.3	130.6
1449619_s_at	Arhgap9	AU043488	0.626932	0.000236673	0.000147461	0.905738	3.86424	4.2664	41	40.3	71.3	42.6	35.7	38.9	58	44.2	194.6	213.1	141	205.6
1451941_a_at	Fcgr2b	M14216	0.015254	1.01363e-05	8.60883e-06	0.912975	3.88986	4.26064	340.1	322.5	331.1	347.3	288.2	302.9	314.9	318.3	1292	1499.3	1156.8	1268.2
1433474_at	Edil3	BB377340	0.852734	0.000904979	0.00114633	1.03221	4.39616	4.25896	72.9	77	63.2	78.7	70.3	72.5	107.1	51.3	227.8	330	300.8	424.2
1427357_at	Cda	AK008793	0.373287	4.37672e-08	4.01661e-08	1.0684	4.54968	4.25841	46.2	58	48.7	47.4	51.3	49.4	60.1	53.2	237.3	216.1	231.5	226.4
1426299_at	Snx20	AF395844	0.00896438	2.96193e-05	1.14435e-05	0.706475	3.00504	4.25356	75.8	77.5	65.2	59.5	52.9	55.7	46.3	41.5	232	216.4	176.8	210.2
1449288_at	Gdf3	NM_008108	0.613812	0.00929612	0.00089174	0.743215	3.16075	4.25281	6.9	27.3	11	2.7	10.2	13.5	8.5	3.4	46	28.1	33.4	43.9
1418026_at	Exo1	BE986864	0.825831	0.000558011	0.001281	1.07246	4.55901	4.25097	12.5	11	10.6	14.2	15.6	16.3	1.9	18	44.1	52.8	49.8	73.5
1445965_at	---	BB037433	0.670532	0.00318778	0.00291821	0.935143	3.97486	4.25054	51.6	58.1	53.1	36.1	47.3	61.5	37.3	39.9	180.4	172.9	288	149.3
1420558_at	Selp	M72332	0.435448	0.000331251	0.000262402	0.904494	3.84309	4.24888	185.5	190.9	188.8	126.9	156.6	148.2	190.1	131.1	488.1	780.4	646.6	744.7
1416250_at	Btg2	NM_007570	0.0458169	0.00186733	0.000966479	0.741847	3.15146	4.24813	491.4	382.1	438.4	325.5	289.6	281.5	274.1	369.5	1526.5	1221.8	1555.2	856.7
1430150_at	Dcp2	AK017809	0.898171	0.000344182	0.000290933	1.0545	4.47684	4.24548	15.5	4.4	4.5	12.3	2.5	12.4	13.5	10.3	39.2	32.6	48.2	44.3
1451128_s_at	Kif22	BC003427	0.531633	0.00120642	0.00150357	1.12654	4.78189	4.24475	21.8	18.8	24.2	32.4	29.7	36.1	19.3	24.4	97.1	96.9	108.1	162.7
1429570_at	Mlkl	AK018636	0.0213503	0.000118592	2.66068e-05	0.68676	2.91335	4.24216	45.2	56.4	49.7	34.5	33.3	33.5	31.6	29.2	141.9	124	117.9	157.5
1423124_x_at	Rad54l	AV310220	0.916862	0.00224628	0.00160623	0.946619	4.01423	4.2406	2	13.7	8.4	4	5	8.8	1.2	11.6	19.3	33.2	27.4	32.9
1427062_at	Rbbp8	BB167067	0.753362	1.51489e-05	1.48701e-05	0.970181	4.11289	4.2393	43	50.2	53.3	41.3	45.6	54.3	39.8	42.5	177.9	222.1	173.1	199.3
1443814_x_at	Ctsh	BB542535	0.0704851	3.29112e-06	1.37984e-06	0.848372	3.59425	4.23665	486.8	402.5	554.7	456.7	421.4	400.1	381.8	409.2	1888	1739	1594.2	1610.4
1420464_s_at	Gm10693 /// Gm15448 /// Lilra6 /// Lilrb3 /// Pira	NM_011093	0.0528529	4.23141e-05	2.71149e-05	0.838686	3.54962	4.23236	132.8	119.1	151.7	150.6	130.3	116.6	108	109.9	524	494.7	400	548.5
1450779_at	Fabp7	NM_021272	0.418558	0.00527434	0.00139145	0.668024	2.82485	4.22866	20.1	2.5	14.7	11.8	8.8	0.8	8.2	15	34.4	25.1	43.3	35.9
1439327_at	Ccbe1	BB197647	0.54561	0.000914522	0.00051052	0.864952	3.65675	4.2277	26.7	24.2	48	25.5	19.2	31.5	33.3	23.6	140.4	118	80.4	116.1
1417856_at	Relb	NM_009046	0.574089	3.74501e-07	1.02976e-07	0.931071	3.93615	4.22755	103.7	76.4	113.6	80.6	88	103.4	82.7	74.4	359.3	353.2	375.4	385.4
1438009_at	Gm11276 /// Hist1h2ad /// Hist1h2ao	W91024	0.05937	2.89704e-06	7.60923e-06	1.33815	5.65651	4.22712	564.6	484.8	432.7	484.2	644.6	549.4	589.5	847.7	2504.8	2599.3	3040.4	2977.9
1424113_at	Lamb1-1	BG970109	0.904095	0.000158423	0.000200143	1.02482	4.3292	4.22436	78.7	98.7	131.3	86.2	148	84.3	89	83.4	405.4	449.3	338.2	516.7
1450648_s_at	H2-Ab1	NM_010379	0.624919	1.49222e-06	3.99786e-06	0.935963	3.95076	4.22107	452.2	442	486.8	538.2	395.9	389	395.7	615.7	2095.7	1908	1795.3	1783.3
1448408_at	Hps1	NM_019424	0.354653	0.00130063	1.33224e-06	0.671966	2.83625	4.22082	43.7	39.8	88.2	17	21.1	38.1	38	29.6	138.3	134.3	123.8	138.8
1427986_a_at	Col16a1	BB766878	0.189977	5.54308e-06	6.13949e-06	1.12501	4.73661	4.21028	542	474.8	655.3	594.9	718.1	639.3	600.1	592.9	2293.5	2859.9	2706.2	2878.3
1458113_at	9530019H20Rik	BB109562	0.0355211	6.25751e-05	8.75443e-06	0.663894	2.79452	4.20929	55.8	40.6	65	43	34.5	41.6	30.4	29.2	134.1	139	133.6	164.5
1428480_at	Cdca8	AV307110	0.990436	1.98884e-05	3.87278e-06	1.00272	4.22011	4.20867	11.7	35	29.3	34.4	25.2	22.9	28.1	34.5	102.1	117.5	123.1	123.2
1438602_s_at	Masp1	BB732340	0.291705	4.33361e-05	2.36659e-05	0.861239	3.6217	4.20523	211	183.4	125.9	177.3	158.4	131.7	177.9	132.8	734.3	650.9	554.3	587
1451241_at	Lamb1-1	BG970109	0.00556986	3.98113e-05	6.03397e-05	1.30759	5.48978	4.19841	72.8	75.6	78.1	62.2	103.3	97.7	91.4	85.1	377.4	443.8	319.1	444.6
1429072_at	Dvwa	AK003211	0.419895	0.113606	0.00796877	0.531111	2.22889	4.19665	4.3	6.7	5.2	28.8	8.2	5	8.9	1.8	14.2	36.7	25.7	23.7
1440919_at	Mobkl2c	BB462480	0.298761	2.93859e-05	4.84143e-05	1.16906	4.90468	4.19538	14	16.7	11.7	13.2	16.2	21.3	13.9	13.6	63.8	80.3	58.4	70.2
1417695_a_at	Soat1	BG064396	0.0615588	2.21641e-06	1.95725e-06	0.801115	3.35857	4.19237	293	262.1	325.9	266.9	288.5	209.4	222.5	199.2	900.5	1015.1	904.2	1035.5
1455881_at	Ier5l	BB078200	0.384924	0.000723553	0.000709106	1.30707	5.4791	4.19188	26.5	15.3	3.9	16.5	18.3	26.5	16.8	19.7	100.9	75.6	61.7	102.6
1455127_at	Xkr5	AV293493	0.321077	5.12312e-05	3.95503e-05	0.751252	3.14691	4.18889	16.7	8.5	19.2	15.5	7.6	6.9	12.5	18	45.8	50.7	41.6	50.4
1457753_at	Tlr13	BI655907	0.0450441	1.99065e-05	1.44568e-05	0.834542	3.4912	4.18337	99.5	88.1	106.4	92.2	83.5	93	74.3	71.5	382.1	329.5	288.3	348.4
1424556_at	Pycr1	BC006727	0.812099	3.34396e-05	3.1626e-05	1.02759	4.2959	4.18057	214.5	199.8	159	245.9	211	200.5	248	182.3	745.4	818.6	965.6	989.6
1458648_at	AU042950	AU042950	0.397255	6.61312e-05	4.0868e-05	0.903319	3.76479	4.16773	35.3	33.7	43	26.6	33	28.7	34.6	28.9	110.8	151.4	120	139.6
1416120_at	Rrm2	NM_009104	0.467041	8.04564e-06	2.29434e-05	1.13462	4.72493	4.16435	76.3	74.6	60.5	79.8	78	58.1	79.1	115.2	324.5	312.3	341.7	397.4
1417961_a_at	Trim30	BM240719	0.335956	0.000234818	0.000210965	0.916364	3.81473	4.1629	146	136.9	146.3	120.8	143.5	113.7	140	106.8	610.7	522.9	387	577.5
1424302_at	Lilrb3	U96693	0.689043	0.000117725	8.61397e-05	0.942788	3.92169	4.15967	119.2	103.1	164.2	106.4	130.9	116.5	90.4	126.9	584.7	490.4	402.9	455
1446162_at	Pabpc5	BB435741	0.240841	0.0181101	0.00127788	0.561404	2.33333	4.15625	2.1	0.2	1.4	2	1	0.2	1	1	2.4	4.3	3.5	3.1
1445639_at	9130014G24Rik	BB751940	0.190462	0.0128155	0.000252552	0.495979	2.05898	4.15135	6.4	17.4	6.6	6.9	3.8	6.7	0.2	7.8	19.6	19.7	20.7	16.8
1432952_at	4930448E22Rik	AK015416	0.489859	0.057498	0.00498747	0.59887	2.48588	4.15094	0.6	4.7	1.8	10.6	2	1.6	5.4	1.6	8.8	15.6	11.5	8.1
1443086_at	Alcam	BB534113	0.303084	0.000751563	0.000527264	0.85361	3.54078	4.148	39.3	35	46.6	28.7	29.7	27.9	29	41.1	161.4	130.6	92.8	144.9
1448466_at	Cdca5	NM_026410	0.71879	0.000638455	0.00031382	0.920283	3.81534	4.14583	39.3	22.8	18.3	18.7	25	17.8	23.5	24.9	79	86.6	90.2	122.3
1437152_at	Mex3b	BG072837	0.448813	0.00647494	0.0053937	0.850367	3.52438	4.14454	32.4	40.8	46.3	30.2	27.5	33.2	47.1	19.5	100.2	123.1	105.5	198.8
1416516_at	Fscn1	NM_007984	0.77	0.000181062	0.000219438	1.12892	4.67831	4.14408	33.9	8.7	11.8	28.6	33.8	5.7	29.2	25	76.7	108.5	102.5	100.6
1450692_at	Kif4	NM_008446	0.965053	0.000256116	0.000289828	0.99068	4.10438	4.14299	36.6	20.4	24.7	25.6	31.4	22.8	16.6	35.5	84.7	110.3	110.3	135.1
1448562_at	Upp1	NM_009477	0.613661	3.20477e-06	1.0009e-06	0.929953	3.84723	4.13702	49	33.3	38.4	29.2	37.1	39.5	28.1	34.7	145.4	139.5	134.6	157.2
1450997_at	Stk17b	AV173139	0.476715	3.27512e-06	1.84647e-06	0.924941	3.82627	4.13677	347.9	279.6	392.3	284.5	324.6	325.9	250.6	305.3	1312.9	1327.2	1111.7	1238.8
1450886_at	Gsg2	BE457839	0.214434	3.72446e-06	2.93152e-05	1.35093	5.58696	4.13563	7	8.2	8.7	8.3	7.6	15.9	7.7	12.3	39.3	43.4	47.9	49.3
1416961_at	Bub1b	NM_009773	0.570789	1.56374e-05	0.000150968	1.18802	4.91116	4.13391	34.5	38.1	36.7	35.9	58.7	24.4	22.9	66.5	149.7	177	181.7	204.7
1420994_at	B3gnt5	BM214359	0.00255368	0.00160228	4.6635e-05	0.474456	1.96064	4.13239	69.6	62.2	65.5	41.5	27.7	30.5	26	29.1	103.1	141.1	116.5	107.5
1450533_a_at	Plagl1	NM_009538	0.339558	0.00432646	0.00138522	0.667925	2.75975	4.13183	22.1	18	31.4	8	17.2	22.1	3.1	10.7	38.6	68.7	56	56.1
1420824_at	Sema4d	AV256403	0.156953	3.73132e-06	7.30484e-07	0.842479	3.47862	4.12903	282	261.3	235.7	177.7	192	201.5	194.8	217.7	777.1	804.1	834.3	912.5
1449360_at	Csf2rb2	NM_007781	0.854754	9.12179e-05	6.28344e-05	0.975328	4.0266	4.12846	144.9	117.5	163.4	93	129.3	137.5	131.4	107.8	454.7	557.8	459.2	617.3
1430700_a_at	Pla2g7	AK005158	0.0278826	1.16663e-05	2.09757e-05	1.36965	5.65399	4.12806	160.4	161.2	181	123.4	181.7	240.4	243.4	191.9	887.8	976.6	732.9	942.1
1456543_at	Prokr1	BB037474	0.0112601	0.00128045	0.000259686	0.586572	2.42049	4.12651	10.1	15.4	15.6	15.5	10	9.7	6.8	6.7	30.6	40.2	26.9	39.3
1416740_at	Col5a1	AW744319	0.448192	6.01493e-08	8.07721e-08	1.04894	4.32244	4.12076	1922.4	1769.8	2119.1	2016.6	2209.8	2209.9	1930.7	1860.6	7945.5	8655.6	8427.3	8807.2
1435468_at	B3gnt9	BB547181	0.00472755	4.46486e-05	1.27865e-05	0.684161	2.81855	4.11972	249.3	328.9	324.1	277.1	198.6	196.5	228	183.8	731	785.5	856.9	950.8
1452521_a_at	Plaur	X62701	0.0790085	0.000129957	1.69041e-05	0.684126	2.81835	4.11964	198.8	146.7	220.4	119.5	132.3	130.9	120	85.7	438.5	555.4	495.6	442.2
1416205_at	Glb1	NM_009752	0.364008	6.89327e-05	6.10059e-05	0.924335	3.80654	4.11814	156.2	177.3	197.4	190.7	157.2	175.1	191.5	143.2	574.7	643.7	712.7	815.7
1419178_at	Cd3g	M58149	0.105556	3.19595e-05	1.96811e-05	0.84763	3.48758	4.11451	23.4	24.6	22.7	17.9	21.6	18.6	17.1	17.8	84.9	63.5	78.9	81.7
1451905_a_at	Mx1	M21039	0.915883	0.00100848	0.00108129	1.01384	4.1707	4.11377	21.2	26.2	20.4	18.9	28.4	18.5	19.7	21.3	75.4	109.2	66.3	110.7
1423407_a_at	Fbln2	BF228318	0.309565	9.81964e-06	3.38661e-06	0.879462	3.61211	4.10718	1369.8	1107.8	1683.5	1128.5	1162.1	1199.1	1266.5	1024.3	4778.5	4552.5	4396.3	5379.3
1455737_at	Ppm1h	AU040848	0.412562	3.97976e-05	1.31126e-05	0.849042	3.48674	4.10668	96.1	90.4	130.8	63.6	77.8	106.3	68.6	70.7	305.8	369.1	299.3	353.9
1449455_at	Hck	NM_010407	0.0935818	4.67881e-05	3.31393e-05	0.811794	3.3332	4.10597	136.1	117.2	146.3	114.2	123.2	117	93	83.9	473.4	438.2	347.5	453.5
1435404_at	Disp2	BB023743	0.594689	8.22758e-06	1.00222e-05	0.922269	3.78361	4.10251	10.3	12.2	14.6	10.5	11.4	13.2	12.1	7.2	41.9	48.2	40.8	49.2
1426120_a_at	Cd244 /// LOC677008	AF082803	0.133418	4.47439e-05	4.43326e-05	0.697849	2.86129	4.10015	19.6	19	26.9	27.5	14.5	11.8	12.5	26.1	67	65	58.7	75.4
1418156_at	Kcne4	NM_021342	0.0224957	0.000973542	0.000221688	0.642216	2.6314	4.09738	285.8	186.6	295.6	212.2	157.7	185.4	140.6	145.8	606	666.3	799.5	507.5
1417470_at	Apobec3	NM_030255	0.109209	0.000298139	0.000235929	0.803356	3.28966	4.0949	108.5	107.5	97.3	92	92.2	102	73.5	57.9	350.5	407.6	261.1	314.1
1415810_at	Uhrf1	BB702754	0.804321	9.30773e-05	0.000195627	1.067	4.36361	4.08959	115.3	80.3	73.7	66.5	77	60.8	75.5	145	301.5	342.3	386.5	435
1450716_at	Adamts1	D67076	0.00106623	7.12991e-07	3.12358e-07	0.733414	2.9988	4.08882	266.5	288	278.9	245.8	193.8	199.7	218.6	179.4	874.9	807.5	763.8	790.1
1439045_x_at	Tc2n	AV376747	0.270936	0.00482084	0.00917459	1.86486	7.62162	4.08696	0.5	1.8	0.6	4.5	0.8	4.3	5.1	3.6	9.5	21.6	11.4	13.9
1452382_at	Dnm3os	BB542096	0.0599285	0.000937051	0.000518705	0.788378	3.22192	4.08678	352	277.8	416.1	332.5	298	291.3	246.8	250.6	779	1175.1	1113	1374
1450757_at	Cdh11	NM_009866	0.99772	1.36353e-05	9.91292e-06	1.00027	4.08536	4.08426	764.5	624.1	697.1	509.2	629.1	708.1	607.7	650.7	2271.2	2814.5	2582.4	2933
1431358_at	4930547N16Rik	BM877490	0.990647	0.000411828	0.000289811	0.997691	4.06928	4.0787	8	11.9	7.8	15.6	8.2	11.7	11.9	11.4	39	41.8	38.5	56.9
1435644_at	Sh3pxd2b	BM234433	0.00864978	6.15137e-06	7.69637e-06	1.12066	4.5687	4.07681	422.1	414.9	427	396.1	485	483.6	449.3	442.5	1741.2	1913.7	1756.2	2173.4
1435792_at	Csprs /// Gm7582	BB148221	0.826494	0.000752525	0.00101182	0.927007	3.77737	4.0748	6.7	8.2	9.1	3.4	8.1	8.5	1	7.8	26.9	30.4	17.9	28.3
1446190_at	Dclk1	BB269897	0.874789	0.000517816	0.000594034	1.01749	4.14596	4.07469	40.2	44.7	38.1	42.8	51.3	39.7	45.8	31.9	119.2	174	211.4	182.8
1447771_at	---	AW050081	0.726592	0.000165007	0.000188264	0.961767	3.91759	4.07332	27.6	29.5	29.1	31.5	36	23.3	29.9	24	87.9	112.3	125.2	135.7
1434734_at	Rad54b	AW547464	0.413995	0.00016839	0.000973666	0.707207	2.87838	4.07006	3.6	6.5	6.6	5.5	1.3	5.2	1	8.2	14.1	14.9	18.9	16
1460129_at	Slc6a2	BB057781	0.169615	6.22571e-06	8.17599e-06	1.25465	5.10643	4.07	95.7	80.6	51.2	78.8	111.8	107.6	89.2	75.7	363.1	447.9	372.9	380.2
1422124_a_at	Ptprc	NM_011210	0.0557571	2.8136e-05	1.45862e-05	0.751512	3.05736	4.06828	607.4	809.7	834.7	675.5	710.5	520.6	496.7	472.1	2401.5	2428.3	1902.1	2217.9
1417171_at	Itk	NM_010583	0.263897	0.00452686	0.00340595	0.644351	2.61925	4.06494	7.1	7	6.3	3.5	6.3	1.4	6.6	1.1	19.5	18.8	12.2	12.1
1456635_at	Gm2397	AW909306	0.123631	0.00103567	0.000649546	0.603951	2.45437	4.06386	18.3	25.4	32.2	30.4	29.5	5.8	16.4	12.5	57.2	78.5	54.2	71
1419042_at	Iigp1	BM239828	0.15858	0.000725195	0.000446243	0.737531	2.99331	4.05856	82.7	100.3	107.8	68.1	69.8	97.4	45.8	51.7	286.9	261.6	199	326.8
1441811_x_at	Tmem176a	AU040201	0.325735	7.36695e-06	3.592e-06	0.908439	3.68601	4.05752	240.6	244.4	332.8	255.8	256.9	253.1	241.8	223.5	1082	923.3	899.8	1052.2
1456494_a_at	AI451617 /// Trim30	BG068242	0.258695	6.37889e-05	4.86843e-05	0.831936	3.37552	4.05743	64.4	51.1	72.3	50.8	41.4	67.6	45.9	43.6	218.1	200.8	163.7	222.8
1417589_at	Galnt3	AK019995	0.0298645	0.78353	0.00816286	0.268293	1.0878	4.05455	1.9	7.8	4.9	5.9	0.2	1.1	2.5	1.7	3.9	7.3	7.2	3.9
1442551_at	---	BB345778	0.561389	0.000274471	0.000475023	1.16854	4.73034	4.04808	2.6	3	1.6	1.7	2.3	2.5	4	1.6	11.8	7.6	10.5	12.2
1430744_at	Napsa	AK007861	0.0992787	0.182362	0.00847439	0.407986	1.65104	4.04681	16.7	24.4	12.5	4	8.8	5.5	4	5.2	19.1	23.4	16	36.6
1431226_a_at	Fndc4	AK013203	0.0829185	6.99074e-05	5.98403e-05	0.825029	3.33835	4.04635	66.8	64.4	68	59.7	53.1	57.2	63.8	39.5	176.4	226.8	210.7	250.4
1459163_at	---	BG068110	0.210418	0.00765433	0.000452943	0.531707	2.15122	4.04587	3.5	6.1	2.4	8.5	4.6	0.7	1.2	4.4	11.5	9.5	10.7	12.4
1449877_s_at	Kifc1 /// LOC100044746	NM_016761	0.517952	0.0001797	0.000184101	1.15226	4.65914	4.04348	16.3	25.7	22	37.8	31.7	20.5	28.7	36.4	88.2	122	129.9	134.2
1421462_a_at	Lepre1	NM_019783	0.550826	1.87925e-05	2.07935e-05	0.958076	3.87389	4.04341	149.3	148.5	157.3	143.6	150.8	166.3	133.2	123.3	500.5	551.4	602	665.4
1433741_at	Cd38	BB256012	0.105191	0.000807173	0.000613179	0.880774	3.55791	4.03953	167.3	138.1	152.4	131	139.9	121.8	134.4	122.5	540.3	508.9	376.4	669.3
1455536_at	A630023A22Rik	BB229670	0.351084	0.000861011	0.0018208	1.80693	7.29703	4.03836	13.4	3	2.7	1.1	1.8	7.6	12	15.1	36.6	29.8	31.8	49.2
1427164_at	Il13ra1	BB730912	0.608571	4.68995e-08	1.62464e-08	0.968987	3.91287	4.0381	133.3	105.4	123.4	111.9	117.3	111.8	121.5	108.7	477.6	439.8	468.1	469.2
1452040_a_at	Cdca3	BI081061	0.0889872	0.000142605	0.00020086	1.18139	4.7694	4.03709	67.4	76	63.1	71.9	90	81.6	66.7	90.6	257.5	310.4	361.9	398
1451320_at	Arhgap8	BC010306	0.435999	0.000800481	0.00174134	0.650602	2.62651	4.03704	6.9	16.9	6.6	11.1	9.2	15.9	1.1	0.8	26	30.7	27.4	24.9
1452098_at	Chtf18	BM233289	0.803027	0.00123833	0.00190369	1.17438	4.74021	4.03636	1.9	15.7	2.5	8	2	14.5	2.6	13.9	24.3	36.9	39.3	32.7
1448316_at	Cmtm3 /// LOC100046883	NM_024217	0.505025	5.45529e-05	3.92217e-05	0.937534	3.78232	4.03433	385.1	311.1	443.9	332.7	345.7	356.4	370.2	308.5	1185.3	1537	1270.9	1577.4
1425622_at	Edil3	AF031524	0.621424	0.00018857	0.000239037	1.06148	4.28176	4.03378	23.5	21.1	27.1	25.9	24.2	29	19.5	30.9	76.3	107.4	113.4	120.8
1424511_at	Aurka	U80932	0.898062	4.60354e-05	6.42468e-05	1.01542	4.0949	4.03271	44.5	44.9	37.4	41.8	35.7	38.8	40.6	56.1	152.6	157.2	173.2	207.4
1423757_x_at	Igfbp4	BC019836	0.544261	1.44116e-07	1.20745e-07	1.02637	4.13902	4.03266	2193.5	2213.9	2464.6	2080.2	2337.8	2344.3	2338.8	2167.4	9211.9	9818.8	8657.2	9365.4
1422875_at	Cd84	NM_013489	0.37923	1.49754e-06	7.32798e-07	0.896198	3.61132	4.0296	151.1	114.7	170.3	129.4	140.6	144	118.3	103.9	483.7	508.3	495.7	554.5
1435165_at	Cntn2	AV339091	0.0615679	0.922189	0.00112665	0.239583	0.965278	4.02899	6.9	10.7	10.5	0.7	2.7	1.1	0.7	2.4	5.5	8.3	5.8	8.2
1422944_a_at	Diap3	NM_019670	0.59287	4.12721e-06	2.06624e-06	1.11304	4.48406	4.02865	15.3	13.7	25.6	14.4	24.7	19.6	17	15.5	75.9	77.3	84.3	71.9
1449060_at	Kif2c /// LOC631653	NM_134471	0.300506	0.000243043	9.14906e-05	0.831633	3.34609	4.02352	22.5	34.7	38.2	22.2	20.9	26.2	23.5	27.2	85	99.7	88.7	120.1
1435476_a_at	Fcgr2b	BM224327	0.00113818	1.38249e-06	8.66653e-07	0.820884	3.29885	4.01866	484.4	439.6	483.8	459.7	365	368.8	396.6	402.6	1482.9	1690.8	1435.8	1551.1
1417541_at	Hells	NM_008234	0.316361	1.46335e-05	1.00807e-05	0.885341	3.5566	4.01721	29	40.1	30.6	38.1	32.3	31.8	23.6	34.3	115.9	113.5	141.3	119.4
1426817_at	Mki67	X82786	0.15658	1.6258e-05	4.60977e-05	1.30066	5.22156	4.01455	186.1	236.7	195.8	232.2	255.3	253.5	212.9	384.9	930.1	1069	1247	1196.4
1433179_at	Morn1	AK013714	0.0952476	0.0211842	0.00858483	0.6	2.4087	4.01449	3.5	3.2	2.8	2	2.4	2.7	0.8	1	5.3	10.7	5.7	6
1455104_at	Mxd1	AV228517	0.775713	4.17333e-05	2.68233e-05	1.04516	4.19252	4.01135	76	54.2	48	41	57.6	50.9	53.9	66.7	262.4	244.8	197	214.8
1455747_at	Ggt5	BB010646	0.225083	0.00121997	0.00093877	0.873269	3.49584	4.00317	41.1	34.9	29.9	38.5	35.8	27.1	35.4	27.8	169.7	109	126.4	99.7
1416818_at	Parva	NM_020606	0.904537	0.000114916	8.9452e-05	0.985499	3.94334	4.00136	86.9	121.4	87.1	77	88.2	85.6	87.5	105.7	354.1	315.2	347.8	451.4
1427541_x_at	Hmmr	X64550	0.648055	7.99825e-06	4.4338e-06	0.919444	3.67315	3.99496	20	31	22.4	34.6	32.8	22.2	19.2	25.1	96.9	94.7	94.7	110.4
1427746_x_at	H2-K1	S70184	0.0404984	1.1554e-07	9.81932e-08	1.20988	4.82964	3.99182	836.6	947.4	1096.6	826.2	1132.2	1230.9	1056	1065.7	4773.5	4374.1	4467.2	4287.7
1450905_at	Plxnc1	BB476707	0.163318	0.000405271	0.000273748	0.855225	3.41131	3.98879	55.3	45	46.5	61.8	42.3	52	39.6	44.5	161.5	215.8	138.1	196.2
1424991_s_at	Tyms /// Tyms-ps	BC020139	0.643563	6.04095e-05	6.03807e-05	0.977458	3.89793	3.98783	82.9	82.2	78.2	76.1	87.7	72.5	76.1	75.9	250.6	303.2	331.7	359.5
1416309_at	Nusap1	BC009096	0.795846	7.53903e-06	7.58847e-06	1.04901	4.18244	3.98705	33.6	49.8	57.6	65.1	51.5	38.2	57.2	69.3	195.5	208	218.9	239.6
1419248_at	Rgs2	AF215668	0.0148092	5.77421e-06	1.12112e-05	1.37962	5.50041	3.9869	201.5	202.6	158.3	167.8	278.9	272.8	251.8	203.9	968.3	1114.6	1063.4	870.1
1426037_a_at	Rgs16	U94828	0.1757	0.00133543	0.00219305	1.45482	5.7997	3.98654	16.3	7.5	17.9	24.7	21.7	27.4	31.6	15.9	100.3	130.9	65	88.9
1424246_a_at	Tes	BC003808	0.186514	5.06458e-06	2.1766e-06	0.828967	3.30409	3.9858	104.4	69.2	88.9	77.2	62.2	82	58	79.4	276.2	310.9	265.8	269.5
1443783_x_at	H2-Aa	AV086906	0.00750116	8.77421e-06	5.28634e-06	0.697544	2.77994	3.98533	52.8	49.2	50.1	43.3	40.5	36.8	33.3	25.7	133.9	131.2	125.3	152.8
1439827_at	Adamts12	BB004039	0.0143323	2.28996e-06	3.61145e-06	1.30867	5.21018	3.98129	129.7	152.7	161.4	123.8	184.1	208.9	185.7	164.1	692.2	836.1	702	727
1460268_at	---	AV340322	0.359331	0.00241345	0.000556923	0.685811	2.72973	3.9803	8.5	2.1	8.3	10.7	4.9	6.2	8	1.2	20.4	20.4	24.3	15.7
1434748_at	Ckap2	BM208103	0.851706	1.08028e-05	1.4877e-05	1.03519	4.1199	3.97986	44.8	61.3	49.2	74.9	73.5	46.9	45	72.9	209.6	264	245.6	229.2
1417290_at	Lrg1	NM_029796	0.571108	6.2688e-05	9.86454e-06	0.888114	3.53386	3.97907	665.9	363.8	477.1	300.4	429.7	457.4	339.1	378.8	1823.6	1623.7	1468.1	1471
1435582_at	Wdfy4	BM222853	0.00662584	0.000263375	5.70755e-05	0.640041	2.54595	3.97779	163.9	125.1	171.8	130.1	109.4	91.4	81.9	95.5	428.4	337.5	320.5	418
1429954_at	Clec4a3	AK014135	0.0387744	1.06293e-05	1.29589e-05	1.10962	4.41338	3.97736	142	153.4	162.7	154.9	171.1	158.5	181.6	169	691.5	756.6	570.3	687
1448272_at	Btg2	NM_007570	0.122176	0.00102146	0.000616368	0.78477	3.11924	3.97472	284.1	189.7	240	223.8	168.1	142	236.8	188.9	862.1	714	840.9	507.6
1456921_at	---	BE956991	0.109693	0.06117	0.00175379	0.460123	1.82822	3.97333	3.5	3.2	2.3	7.3	2.3	2.2	2.3	0.7	4.7	8.4	9.1	7.6
1456368_at	Gm4787	AV274161	0.212281	0.0233076	0.00492928	0.549451	2.18132	3.97	1.8	6.2	6.4	3.8	5.4	1.1	2	1.5	10	12.8	10.8	6.1
1443721_x_at	Sbno2	BF148215	0.0486568	0.00152871	0.000741104	0.763923	3.03071	3.9673	145	102.4	137.6	103.4	96.9	86.3	100.8	89.1	309.6	453.5	280.8	436.3
1453370_at	Troap	BB489500	0.790493	0.000171382	0.000664616	0.915344	3.62698	3.96243	7.9	8	11	10.9	2	10	7.4	15.2	29.4	39.8	29.2	38.7
1439178_at	Adrbk2	BM935518	0.562038	4.42235e-05	1.98356e-05	1.12682	4.46176	3.95962	29.2	11.6	35	27.5	29	29.8	33.3	24.3	94.9	120.7	125.7	119.6
1431894_at	Itprip	AK014762	0.12455	0.0207638	0.00824323	0.681686	2.6984	3.95842	39.5	22.3	48.3	27.5	22.5	28.6	20.3	22.4	101.5	60.6	139.4	69.8
1452405_x_at	A130082M07Rik /// Tcra	X01134	0.203	4.7445e-06	1.33613e-05	0.768685	3.04257	3.95815	61.7	47.8	58.1	43.8	24.8	56.8	49.2	31.7	147.6	174.9	161.6	159.1
1442768_at	E130112L23Rik	BE988719	0.631998	0.0108848	0.00688983	0.839329	3.31655	3.95143	5.8	7.3	17.7	10.9	5.9	10.1	5.2	13.8	22.7	25.5	44	46.1
1454744_at	F630043A04Rik	BG073400	0.439022	0.00124311	0.00197943	1.30041	5.1358	3.94937	7.1	2.9	9.6	4.7	3.8	8.6	7.4	11.8	20.4	31.4	32.4	40.6
1427691_a_at	Ifnar2	Y09864	0.360794	3.91343e-05	1.94783e-05	0.896857	3.54177	3.94909	100.8	90.3	112.1	69.1	79.7	76.6	90.8	86.8	381.4	333.4	284.3	319.5
1447830_s_at	Rgs2	BB034265	0.0081903	4.07361e-06	9.86748e-06	1.41454	5.58448	3.94792	102	109.1	96.4	99.7	166.3	150.8	143	115.9	615.9	618.5	540.9	498.7
1430259_at	Tnfrsf11a	AK020374	0.40345	0.000487158	6.8961e-05	0.772237	3.04852	3.94764	22.8	19.7	25.1	6.6	12.4	20.6	10.2	14.1	57.8	48.1	54.3	66
1441120_at	---	BB268577	0.278958	0.125401	0.00132345	0.461832	1.82061	3.94215	5.5	14.2	0.9	5.6	5.9	3	1.1	2.1	14.7	9	11.4	12.6
1438498_at	Zmynd15	AI662455	0.210338	0.000151931	0.00014775	0.874454	3.44541	3.94007	22.7	22.7	23.3	22.9	19.6	14.7	24.5	21.3	90.3	78.8	86.2	60.3
1433893_s_at	Spag5	BM208112	0.745137	0.000870123	0.000725677	0.936709	3.68987	3.93919	16.6	27.7	19.1	15.6	24.1	12.6	17.1	20.2	56.5	61.3	90.1	83.6
1424942_a_at	Myc	BC006728	0.602956	5.93048e-06	1.36621e-05	1.0884	4.28359	3.93567	171.9	135.4	195.9	149.5	139.5	172.2	156	242.7	714.6	783.5	624.7	673.1
1430305_at	2500004C02Rik	AK010870	0.126513	0.406211	0.00778672	0.34717	1.36604	3.93478	11.1	9.5	4.8	1.1	1.2	1.3	4.9	1.8	11.8	8.1	5.3	11
1457827_at	Arsj	BB084936	0.59986	7.26437e-06	2.47473e-05	1.10885	4.36195	3.93376	35.5	26.8	26	24.7	29.1	40.2	37.8	18.2	114.5	132	110.9	135.5
1427161_at	Cenpf	BE848253	0.240449	0.000140131	0.000233554	1.20898	4.75561	3.93357	63.3	45.6	57.1	65.6	70.2	60.8	56.2	92.8	225.4	251.6	282.7	341.7
1420674_at	Pla2g2e	NM_012044	0.0112727	1.29747e-05	9.72214e-08	0.606333	2.38439	3.93248	169.6	122.9	200.7	185.8	97.1	122.7	105.6	86.3	389.4	398	417.8	413.8
1458019_at	---	BB548602	0.326113	0.00011834	5.02659e-05	0.835366	3.28252	3.92944	16.8	12.1	10.9	9.4	13.2	9.3	10	8.6	48.5	38	38.7	36.3
1428283_at	Cyp2s1	AK004699	0.488468	0.00935771	0.007636	0.876692	3.44461	3.9291	44	47.7	66.1	41.7	46.5	51.6	25.4	51.4	106.1	187.3	140.3	253.5
1426010_a_at	Epb4.1l3	AF177146	0.367814	1.0823e-05	4.02668e-06	0.87577	3.43922	3.92708	141.2	104.4	147.1	94.3	118.4	100.3	121.6	86.2	469.3	410.8	384.9	409.9
1437187_at	E2f7	BG069355	0.546339	2.45819e-05	2.54674e-05	0.952504	3.73834	3.92475	31.6	27.2	29.9	27.1	27.8	32.7	24.4	25.4	91.1	119.1	103.8	118.9
1450350_a_at	Jdp2	NM_030887	0.217523	1.81146e-06	6.82691e-07	0.897582	3.52255	3.92448	378	300.2	377.8	292.4	297.9	322.1	308.1	282.2	1088.9	1153.2	1254.6	1253.1
1443777_at	---	BB343867	0.210133	0.00577057	0.00101493	0.671756	2.63613	3.92424	12.4	3.6	13.2	10.1	5.7	5.8	8.8	6.1	25.5	17.7	33	27.4
1423428_at	Ror2	AV324603	0.137542	1.14975e-05	5.93101e-06	0.801929	3.14662	3.92382	47.8	36	39.5	32.2	24.7	37.4	27.5	35.1	109.8	124.9	119.2	135.4
1442613_at	Spon1	BQ175871	0.419019	3.3004e-07	1.21228e-06	1.08479	4.25572	3.92308	19.8	18.4	18.1	18	20	15.4	23.8	21.4	82.1	81.7	71.7	80.7
1438660_at	Gcnt2	BM239196	0.556604	8.42844e-05	5.26929e-05	0.930956	3.65063	3.92138	170.3	111.2	134	114.6	134.2	110.3	117.5	131.5	410	569.2	447.3	508.7
1419768_at	Cd22	AF102134	0.000481523	0.00142312	1.03239e-05	0.423701	1.66104	3.92031	79.1	69.2	90.7	63.1	31.4	27.6	31.6	37.4	125.9	139.3	107.5	129.1
1422053_at	Inhba	NM_008380	0.0137703	0.000240982	4.00797e-05	0.657631	2.57808	3.92025	338.8	222.4	345.9	280.8	208.8	192.7	201.2	178.5	868	722.7	835.2	636.6
1449193_at	Cd5l	NM_009690	0.684052	0.00141763	0.00199726	0.896341	3.51321	3.9195	26.5	27.8	24.2	19.9	37.6	20	20.5	10.1	93.7	113.4	63.2	75.4
1428455_at	Col14a1	BB521934	0.00395227	7.19639e-05	0.000108964	1.2798	5.01615	3.91947	290.2	349.8	342.1	318.1	437.6	407.6	441.3	377.5	1417.8	2003.1	1446.4	1654.7
1424560_at	Pstpip1	U87814	0.307399	8.61871e-06	8.9903e-06	0.926094	3.62828	3.91782	160.2	148	171.3	157.8	142	175.5	136.4	136.3	498.3	629.2	567.7	617.1
1421385_a_at	Myo7a	NM_008663	0.772679	2.26404e-05	2.00198e-05	1.03026	4.03446	3.91595	136.6	172.8	202.5	155.6	182.9	181	179.2	144.6	568.1	766.5	682	676.4
1415973_at	Marcks	AW546141	0.460039	8.66048e-06	1.06415e-05	1.07631	4.21073	3.9122	825	908.3	999.5	741.3	1045.3	943	994.8	756.1	3631.8	3965.8	3121.4	3909.5
1451563_at	Emr4	AF396935	0.0885542	0.0012896	2.80382e-06	0.577373	2.25748	3.90991	14.2	30.7	17.6	14.4	8.6	11.6	12.7	11.5	43.8	47.2	38.9	43.7
1420904_at	Il17ra	AK010040	0.0418594	3.78229e-06	7.85138e-07	0.794507	3.10637	3.90981	120.6	85.2	101.2	93.5	76.7	80.2	74.9	86.4	312.4	293.7	297	341
1440147_at	Lgi2	BM118120	0.841159	0.00083607	0.000924928	1.02114	3.98943	3.90683	22.6	25.5	25.5	21	26.9	20.9	28.6	20.2	100.9	120.8	89.6	66.1
1447564_x_at	Piwil4	BB814395	0.0720763	0.0820576	0.00522016	0.358586	1.39899	3.90141	4.6	2.9	5.1	7.2	5.2	0.2	0.6	1.1	6.4	6.6	6.8	7.9
1423920_at	Ncaph	BC021499	0.71934	0.00027429	0.000292686	0.955544	3.72123	3.89436	51.5	53.2	44.8	41.7	37.6	37	51.6	56.5	140.3	177.3	171.4	222.5
1455818_at	4930427A07Rik	BE951637	0.0277289	3.9722e-06	3.34713e-06	0.803091	3.12593	3.89237	46.8	44.6	39.6	43.7	36.8	32.8	29.4	41.3	123.4	141.6	131.8	149.3
1415995_at	Casp6	NM_009811	0.914966	2.48785e-06	1.32655e-06	0.989268	3.84843	3.89018	131	128.3	163.1	108.7	138.3	129.4	142.6	115.1	483.2	510.5	485.6	564.6
1439589_at	---	BM239715	0.766179	6.63007e-05	4.88191e-05	1.04926	4.07574	3.88437	26.5	25.3	41.7	42.5	40.5	28.8	39.1	34.3	147.8	161.2	124.7	120.6
1434945_at	Lpcat2	AW743924	0.770375	1.48658e-05	1.24138e-05	1.02435	3.97565	3.88116	118.3	106.6	130.9	149.4	137	120.2	124.4	135.9	543.5	546.2	425.8	493
1425747_at	Dock5	BC016533	0.0117788	7.65706e-05	1.49064e-05	0.67563	2.61961	3.87728	54.1	37.4	46.5	40.5	29.4	27.4	35.1	28.7	109.7	117.7	105	135.2
1421457_a_at	Samsn1	NM_023380	0.535226	0.000178745	0.000167402	0.936186	3.62613	3.8733	32	37.7	34.9	28.6	30	36.3	33.9	24.5	118.7	140.7	92.3	131.3
1427419_x_at	Ccr9	AJ131357	0.659165	0.00160217	0.00200215	1.09537	4.23978	3.87065	8	6.5	11.5	10.7	11.7	11.5	5.6	11.4	52.5	40.1	26.7	36.3
1419247_at	Rgs2	AF215668	0.00594787	2.48845e-06	5.93352e-06	1.37323	5.3147	3.87022	212.5	206.9	213.5	200.9	277.4	320.9	308.6	238.1	1119.4	1187.2	1167.8	957
1426580_at	Plk4	BB706079	0.123916	1.61655e-05	8.2767e-06	0.79381	3.07192	3.86984	59.8	65.3	49.8	44.8	51.3	33	40.3	49.8	145.7	172.4	176.6	180.2
1448591_at	Ctss	NM_021281	0.08432	5.98159e-07	3.35261e-08	0.832656	3.22187	3.86938	2285.3	1940.5	2822.1	2258.1	1911.9	1979.9	2034.3	1822.6	7771.2	7536.9	7070.8	7603.8
1449699_s_at	C330027C09Rik	AU018569	0.369287	0.000487537	0.00029589	0.865306	3.34694	3.86792	23.4	12.9	18.2	19	18.7	17.1	12.3	15.5	45.1	60.4	70.9	69.6
1436847_s_at	Cdca8	BB702047	0.258346	0.000101579	0.00024674	1.25171	4.83817	3.86525	115.1	93.7	101.2	113.9	153.4	99.2	97	181	393	497.1	571.9	588.9
1436472_at	Slfn9	BI647893	0.945602	0.000113447	0.000215566	0.985761	3.80712	3.86211	32.5	34.4	41.9	45.7	23.7	28.8	46.1	53.7	143.9	137.5	126.1	180.7
1425412_at	Nlrp3	AF486632	0.363013	8.69798e-05	2.20615e-06	0.803864	3.1029	3.85998	82.2	38.4	76.1	41.4	45.7	46.8	57	41.9	193.9	197.2	165.8	181.9
1419510_at	Es22	NM_133660	0.154054	0.33801	0.00417978	0.371212	1.43182	3.85714	3.5	2.7	6.4	0.6	1	0.4	1.1	2.4	5.7	6	3.4	3.8
1429524_at	Myo1f	AK021181	0.0726085	2.95385e-06	2.81951e-06	0.808379	3.11497	3.85336	102.1	91.4	114.1	112.5	103	90.9	77.4	68.3	342.4	323.6	294.1	348.5
1417268_at	Cd14	NM_009841	0.388404	9.91535e-05	5.67142e-05	0.892115	3.43359	3.84882	424.1	280.6	407.4	303.3	291.9	318.4	369.3	283.1	1332.8	1360	1189.3	977.8
1445365_at	Ms4a7	BB323677	0.822995	0.001698	0.00186886	0.950746	3.65821	3.84772	20.9	11.9	16.1	18.1	23.3	17.3	9.1	14	69.6	47.7	47.9	79.9
1458634_at	---	BB254163	0.0197474	0.0304694	0.00495768	0.482432	1.85541	3.84594	20.1	17.3	22.4	14.2	2.6	10.5	8.2	14.4	26.7	49.2	26.5	34.9
1442116_at	Gpr176	BB311924	0.769908	7.00895e-06	1.22176e-05	1.03086	3.95903	3.84052	95	88.3	102.7	89.9	84	97.9	121.7	83.9	320.6	389.2	409.4	369
1421268_at	Ugcg	AA591863	0.279374	6.08608e-05	3.50987e-05	0.875234	3.36055	3.8396	116.9	123	146.1	94.1	94.6	115.6	92.5	117.5	386.4	447.9	335.8	443.3
1439436_x_at	Incenp	BB418702	0.749587	1.3664e-09	8.47349e-08	0.970512	3.72497	3.83815	159.7	175.4	181.9	178.2	161.1	145.3	157.2	211.1	630.3	649.4	659.3	650.6
1449591_at	Casp4	NM_007609	0.594734	6.91607e-07	7.47334e-07	1.04102	3.99559	3.83814	109.9	114.3	128.7	100.5	131.5	123.9	109.7	106.9	448	480.9	413.5	469.2
1424948_x_at	H2-D1 /// H2-K1 /// LOC100044874	L23495	0.306721	0.000604717	0.000449296	0.897455	3.44442	3.83799	289.6	246.6	306.1	214.8	260.8	220.2	256.7	211	1150.6	977.5	725.5	787.5
1438858_x_at	H2-Aa	AV018723	0.0446522	0.000163671	4.73053e-05	0.749071	2.87303	3.83546	1012	1365.1	930.5	944.6	859.1	802.1	790.1	733.9	3405.6	3214.4	2422.9	3173.8
1421546_a_at	Racgap1	NM_012025	0.930176	0.000724745	0.000794865	1.01391	3.88755	3.83423	37.5	47.5	32.2	48.2	35.6	35.7	40	56.4	120	140.8	181.6	200.6
1440633_at	Neil3	AV316939	0.797966	0.000208354	9.30556e-06	0.917603	3.51685	3.83265	21.5	17.9	8	6	13.8	7.4	14.8	13	50.1	50.4	43.4	43.9
1452928_at	Abi3	AK008928	0.216975	1.15364e-06	2.5925e-06	0.841652	3.2249	3.83163	49.6	37.8	45.1	41.8	47.7	30.7	28.9	39.4	147.8	128.5	145.2	140.6
1455500_at	Rnf213	AW556558	0.0153409	8.48507e-05	4.16331e-05	0.780433	2.98741	3.82789	409.5	410.4	467.8	356.9	338.9	346.4	316.6	281.6	1294.1	1313.3	976	1329.7
1459529_at	E230016K23Rik	BB549617	0.584908	0.00644545	0.0049397	0.852632	3.26316	3.82716	3.2	6.9	5.2	3.7	6.1	3.6	1.9	4.6	17.2	21.5	9.9	13.4
1448576_at	Il7r	AI573431	0.897646	1.33253e-05	9.32073e-05	0.970852	3.713	3.82448	11	10.6	10.7	12.3	11.5	14.5	13.4	3.9	41.1	41.8	35.7	47
1420635_a_at	Tcirg1	NM_016921	0.0938806	0.000300036	0.000189364	0.84428	3.22852	3.82399	382.1	355.1	280.5	316.1	300.4	247.1	272.3	306.3	959.9	866.5	1272.7	1207.1
1416246_a_at	Coro1a	BC002136	0.000634608	3.80937e-05	1.60401e-05	0.745248	2.84497	3.81748	719.9	650	760.8	663	528.9	502.1	542.8	508.2	2125.6	2159	1648.5	2014.9
1419153_at	2810417H13Rik	AK017673	0.980723	4.30312e-05	4.8262e-05	0.997406	3.80758	3.81748	336.8	280	288.3	251.2	297.6	269.8	236.5	349.4	914	1045.8	1235.8	1207.1
1444416_at	Cenpa	BI649935	0.444338	0.000129516	3.19031e-05	0.847754	3.23461	3.81551	32	21.6	23.3	43.3	31.3	22.6	28	20	84.9	98.6	112.9	92.4
1418340_at	Fcer1g	NM_010185	0.305067	9.14168e-06	4.14927e-06	0.888269	3.3889	3.81517	832.8	627.6	967.5	817.4	773.9	676.8	802.6	629.4	2906	2975	2434.1	2682.9
1451866_a_at	Hgf	AF042856	0.764715	0.00210222	0.0013131	0.935135	3.56757	3.81503	18.6	6.2	15.5	15.2	14.1	15.2	12.2	10.4	38	56.8	39.5	63.7
1431339_a_at	Efhd2	AK007560	0.0718106	9.74228e-07	5.9879e-07	0.879495	3.3552	3.81492	591.8	576.8	657.8	532	556.7	542.9	470.3	504.3	2013.6	2069.1	1789.7	2040.5
1432448_at	2600006K01Rik	AK011165	0.513676	0.00121921	4.9116e-05	0.766082	2.92203	3.81425	20.3	17.6	10.3	3.1	15.6	7.9	7.6	8.2	41.2	32.6	36.7	39.4
1429831_at	Pik3ap1	BI684288	0.00227941	7.27209e-05	9.12696e-06	0.589172	2.24704	3.8139	64.7	46.9	54.2	54	28.1	32.2	39.5	29.7	125.6	135.9	106.6	125.8
1419838_s_at	Plk4	AI385771	0.384387	2.9213e-05	1.76636e-05	1.13737	4.33718	3.81334	54.6	68.8	107.5	81.4	92.5	83.3	87.6	91.8	285	354.6	334.4	380.5
1444451_at	Pappa2	BB101283	0.62491	1.682e-05	1.71522e-05	0.956967	3.64908	3.81317	48.7	53.9	42.1	50.5	50.7	42.4	53.6	40.1	185.6	162.7	160.7	203.3
1454287_at	4931428A05Rik	AI131964	0.920654	0.00581901	0.00772007	1.05521	4.02147	3.81105	4.8	11.4	2.2	14.2	17.6	7	8.1	1.7	28.6	35.3	45.8	21.4
1458662_at	Daam1	BB546123	0.0944592	0.000666134	0.000964442	1.35179	5.14906	3.80907	36.2	29	16.8	35.4	44.8	43.6	34.4	35.9	104	188	170.8	141.7
1433575_at	Sox4	BG083485	0.331343	2.41737e-05	2.09562e-05	0.954107	3.634	3.8088	690.9	599.3	648.9	592.9	633.2	596.3	621.2	565.1	2007.6	2413.3	2140.1	2640.3
1430165_at	Stk17b	AI661948	0.0204965	0.0025965	0.000222479	0.570244	2.17171	3.80838	207.3	190.2	275.3	147.2	117.8	133.6	90.7	125.5	560.2	444.4	381.6	394.6
1417219_s_at	Tmsb10	NM_025284	0.308713	5.02054e-06	5.27213e-06	0.948934	3.61002	3.80429	819.7	801.4	845.4	790.1	814.3	844.9	743.4	687.7	2841.6	3052.7	2608	3254.1
1432396_at	3110018I06Rik	AK014062	0.218777	0.157489	0.00400047	0.443366	1.68608	3.80292	2.4	3.3	13.3	11.9	7.4	2	2.4	1.9	10.3	10.3	14.5	17
1435477_s_at	Fcgr2b	BM224327	0.460091	1.02569e-06	9.16323e-07	0.958248	3.64298	3.80171	654.8	612	726	706.5	704.6	614.2	669.9	597.9	2579.6	2623	2264.6	2366.3
1445452_at	Traf1	BB218245	0.636395	2.76579e-05	2.67962e-05	1.04924	3.98697	3.79986	36.1	26.5	39.1	36.4	40.6	36.1	37.3	30.9	112.1	142.7	149.7	146.1
1426973_at	Gpr153	AK004377	0.402777	2.05069e-06	1.71152e-06	0.933763	3.54618	3.79774	223.5	190.6	225.3	183.4	200.8	208.1	198.2	161.2	698.3	779.2	668.2	772.1
1434767_at	C79407	BE951628	0.746446	1.13082e-06	9.84185e-07	1.02135	3.87811	3.79704	25.5	27	27.7	32.2	27.3	27.4	28.4	31.7	98.9	107.6	112.5	116.9
1454581_at	5330425B07Rik	AK019908	0.0216542	0.219507	0.00140166	0.345656	1.31238	3.79679	7.8	19.5	15	11.8	8.1	5.6	1.2	3.8	17.1	13.7	22.6	17.6
1422515_at	Pate4	NM_020264	0.913109	0.00749606	0.0059241	0.929293	3.52525	3.79348	2.3	2	11.5	4	10.4	1.1	5.1	1.8	17.5	11.1	20.3	20.9
1452752_at	Lepre1	BE283629	0.722609	1.59608e-05	1.54069e-05	0.986333	3.74067	3.7925	158.4	140.2	146.9	154.5	159.1	143.1	145	144.6	525.4	547.4	514.8	656.8
1435226_at	Rnf19b	BG064140	0.334615	4.89557e-06	2.39837e-06	0.889336	3.3707	3.79013	175.9	165.8	188.6	239.6	166.7	172.5	143.6	201.9	592.4	622.4	698.3	682
1460640_at	Atox1	NM_009720	0.884237	0.00223247	0.0049425	1.05556	4	3.78947	2	2	1.3	1.9	2.1	0.7	1.2	3.6	7.8	4.1	8.6	8.3
1448950_at	Il1r1	NM_008362	0.466979	2.76969e-05	2.78004e-05	1.07441	4.07097	3.78903	305.6	265.5	348	243.4	308.1	353.1	310.8	277	1189.9	1329.4	975.5	1237.7
1419561_at	Ccl3	NM_011337	0.086326	5.24172e-05	0.000267265	2.11905	8.02381	3.78652	4.9	2.2	7.4	2.3	7.9	13.4	4.2	10.1	27.5	31.9	39.8	35.6
1444894_at	Ptpn18	BG076324	0.0276042	0.13222	0.00312047	0.371014	1.40435	3.78516	18.7	9.5	23.1	17.7	10.4	1.3	10.8	3.1	18.5	30.2	20.4	27.8
1424727_at	Ccr5	D83648	0.164664	0.000605632	0.000455593	0.844911	3.19663	3.78339	115.1	90.6	116	111.6	100.1	89.4	108.6	68	427.1	337.4	254.6	366
1418599_at	Col11a1	NM_007729	0.102414	2.32023e-05	1.40664e-05	0.874539	3.30563	3.77985	1272.6	1069.7	977.8	1047	1009	997.6	867.3	945.3	3013.3	3722	3748.8	3951.9
1419015_at	Wisp2	NM_016873	0.0584077	0.000680908	0.000192223	0.729032	2.75521	3.77927	813.5	477.5	816.3	776.8	472.2	540.9	557	532.5	2376.7	1685.8	2207.7	1676.1
1447838_x_at	Eml4	BB359162	0.370225	0.00383487	7.49224e-05	0.662757	2.5044	3.77876	2.4	14.4	11.1	6.2	9.4	4.2	3.3	5.7	20.4	19.9	21	24.1
1420381_a_at	Rpl31	NM_053257	0.671777	2.11666e-06	2.38852e-06	1.06346	4.01577	3.77613	146.7	105.8	103.7	151.2	160	128	102.2	149.4	504.7	498.3	558.5	476.1
1432331_a_at	Prrx2	AK019971	0.855903	8.47998e-07	9.98859e-07	0.991833	3.74429	3.77513	197	212	215.4	208.2	193.2	209.1	228.1	195.4	768.9	761.7	729.4	857.5
1452031_at	Slc1a3	BB357585	0.92147	2.37007e-05	4.00311e-05	0.981075	3.69677	3.76808	76	49	56.2	51.3	33.4	73.7	66	55	198.5	222.6	193.3	245.1
1430352_at	Adamts9	BG141912	0.0402005	4.61249e-05	9.85777e-06	0.745583	2.80883	3.7673	83.3	67.9	77.9	53.9	49.8	57.5	56.2	47.5	180.2	228.4	189.4	196.9
1427327_at	Pilra	BB775785	0.154212	2.36566e-05	1.3037e-05	0.828162	3.11981	3.76715	45.4	50.1	64.5	49.5	41.9	50.4	47.3	33.9	182.7	152.4	146.1	172.4
1460245_at	Klrd1	NM_010654	0.000406817	0.000180705	6.95395e-05	0.673279	2.53401	3.76368	62.2	62.2	63.5	59.1	44.8	45.4	42.4	33.7	171.5	180.9	136	137.5
1418365_at	Ctsh	NM_007801	0.18484	1.59792e-05	1.12707e-05	0.906184	3.40989	3.76292	736.7	618.5	792.1	682.7	680	646.3	666.6	571.6	2666.6	2348.4	2072.8	2562.2
1423516_a_at	Nid2	BB781435	0.351169	3.67337e-05	3.19137e-05	0.928941	3.49265	3.75981	111.9	118.9	137.4	114.5	116.3	125.1	111.6	95.4	395.4	462.3	357.5	470.7
1416121_at	Lox	M65143	0.569604	8.73428e-07	1.04214e-07	0.946735	3.5571	3.75723	2620.1	1697.4	2306.7	2132	2076.1	2011.9	2125.5	2076.3	8331.1	7416.1	7711.7	7687.8
1430313_at	Adamtsl1	AK020115	0.488626	2.58907e-06	9.72822e-07	1.12634	4.22935	3.75496	15.8	27.7	33.6	25.8	32.2	24.3	25.5	33.9	110.9	115.7	100.6	108
1416035_at	Hif1a	BB269715	0.00832409	3.58875e-07	2.58826e-07	0.866533	3.25352	3.75464	270	243.2	269.4	261.1	238.6	207.9	227.8	230.1	791.6	899.6	830.3	874.2
1426936_at	BC005512 /// F630007L15Rik /// Gm6958	BC002257	0.805546	1.68084e-05	5.02938e-06	1.0608	3.98029	3.75217	61.4	59.9	87.2	30	78	41.4	63.6	70	217.5	254	247.5	230.3
1460574_at	Fat4	BB038914	0.0226085	4.51641e-05	6.53444e-05	1.19765	4.4903	3.74925	114.4	102.1	120.5	106.2	141.5	122.1	144.2	123	394.8	541.9	494.9	558.5
1438650_x_at	Gja1	AV330726	0.346757	3.5583e-05	2.45001e-05	0.900816	3.37533	3.74697	396.8	295.4	289.2	317.2	239.9	328.9	287.3	313.7	1241	986.2	980.3	1175.7
1455221_at	Abcg1	BQ176322	0.00188924	0.00014281	3.61475e-05	0.668911	2.50612	3.74657	37.8	41.7	47.1	36.8	24.9	27.2	30.1	27.1	85.6	99.5	106	118.4
1449154_at	Col11a1	NM_007729	0.0386882	0.00040111	0.000246546	0.835634	3.13001	3.74567	410.8	418.7	375.6	323.2	319.1	330.8	292	335.2	992.7	1153.3	1118.8	1518.8
1436623_at	Entpd7	AV381133	0.0229533	6.77769e-05	3.64079e-05	0.658722	2.46641	3.74424	48.9	39.9	52.6	43.2	37.7	37	27.5	19.4	102.4	112	109	131.9
1452295_at	Pmepa1	AV291712	0.366374	1.08129e-07	1.36917e-08	0.920573	3.44565	3.74294	201.5	183.8	237.1	173.3	180.7	178.7	205.8	167.3	699.6	701.7	675.9	664.5
1455426_at	Epha3	AV226618	0.0068271	0.00183934	0.00334728	1.52577	5.71043	3.74266	41.1	48.8	32.3	40.8	65.2	68.4	65	50.1	130.6	300.7	248	251.5
1452190_at	Prcp	AK011112	0.0279572	1.27474e-05	1.0965e-05	0.901976	3.37421	3.74091	247.9	253.2	251.8	259.1	239.4	226.8	241.3	205.3	770.3	925.4	777.7	941.3
1456158_at	2610109H07Rik	BB815856	0.627904	0.000472002	0.000296974	0.913835	3.41626	3.73838	25.3	12.3	20.8	24	13.4	19.9	19.9	22.1	89.6	62.3	68.8	60.8
1451043_at	Nek6	BB528391	0.130706	0.00230023	0.00254135	0.565757	2.11414	3.73684	10.1	11.3	11.1	7.8	9.9	1.7	9.7	1.5	22.4	26.2	16.3	20.3
1418642_at	Lcp2	BC006948	0.149637	1.35544e-05	2.45541e-05	1.80313	6.73438	3.73484	8.9	1.3	15.1	6.7	18.4	19.2	11.9	8.2	50.3	56.1	50.3	58.8
1427911_at	Tmem173	AK012006	0.834165	4.26655e-06	1.62955e-05	0.966418	3.6089	3.73431	156.9	200.5	171.4	194.8	197.6	198	206.2	97.5	736.5	616.3	619.6	639
1455983_at	Cdca2	BG065056	0.103828	0.00105342	0.000783487	0.845185	3.15482	3.73269	24.8	28.4	29.9	28	23.4	18.1	25	27.4	97.6	58.3	103.4	91.2
1417426_at	Srgn	NM_011157	0.0693342	3.2674e-06	6.76384e-07	0.781472	2.91605	3.73149	1916.1	1393.5	2086.3	1782.6	1382.8	1454.3	1625.2	1147.5	5427.7	5526.6	4881.1	5097.5
1424518_at	Apol9a /// Apol9b	BC020489	0.0945137	0.000102465	4.64092e-06	0.71066	2.65102	3.73036	19	17	15.2	27.6	14.1	16.2	12.1	13.6	55.7	46.5	56.3	50.4
1450764_at	Aoah	NM_012054	0.00108838	9.11991e-05	0.000264506	2.0758	7.73469	3.72612	21.3	16.8	14	16.5	38.2	29.3	33.1	41.8	155.8	133.5	98	143.3
1418126_at	Ccl5	NM_013653	0.0197245	8.42506e-06	1.5956e-05	1.27301	4.7411	3.72434	43.4	39.7	37.2	42.7	50.6	59.7	44.1	53.1	221.6	181.7	172	197.5
1427165_at	Il13ra1	BB730912	0.221759	1.36594e-05	1.03537e-05	0.881739	3.28336	3.72373	174.3	142.7	132.7	143.9	152.3	114.5	140.1	116.5	513.1	532.3	418.9	484.7
1457001_at	Cenpk	BF018652	0.0887495	0.00483634	0.00280166	0.62753	2.33603	3.72258	6	6.8	5.4	6.5	3.9	0.8	5.7	5.1	11.4	11	18.1	17.2
1453304_s_at	Ly6e	BM245572	0.385107	7.19743e-07	5.38709e-07	0.946372	3.52098	3.7205	1312.1	1353.3	1511.7	1221.2	1362.2	1353.1	1224.5	1169	4833.6	4970.1	4313.9	4889.7
1453067_at	Apitd1	AU043467	0.438764	0.000994888	0.00032277	0.836325	3.10982	3.71843	36.8	19.1	20.1	18.7	20	21.5	15.2	22.5	78.8	58.3	66.5	90.9
1451860_a_at	Trim30	AF220015	0.00363161	0.000112768	6.8023e-05	0.79771	2.96522	3.71717	123.6	120.4	116.7	110.9	93.7	103	97.3	82.2	391.9	339.6	280.3	386.6
1434073_at	Gprasp2	BB028100	0.661155	0.00154583	0.0018707	1.1115	4.13066	3.7163	9.7	21.2	12.8	13.7	22.5	12.6	11.7	17	41.3	74.3	51.2	70.3
1434496_at	Plk3	BM947855	0.345221	5.86438e-05	0.000166171	0.804798	2.98909	3.71409	80.5	66.4	65.6	62.6	68.2	38	31.2	84	231.1	217.3	204	169.9
1434068_s_at	AI662270	BE688410	0.269144	3.24781e-05	2.02979e-05	0.853963	3.17134	3.71367	82.8	74.2	102	69	64.1	64.3	61.8	89.9	247.4	295.3	228.5	269
1427707_a_at	Stil	BC004585	0.639437	0.000337901	0.000585913	1.11713	4.14788	3.71298	12.6	17.1	15.8	22.8	20.2	14.1	13.6	28.4	54.8	64.2	77.7	86.6
1448061_at	Msr1	AA183642	0.338838	9.48173e-06	1.21335e-06	0.817359	3.03446	3.71252	141.5	76.9	144.8	101.1	130.1	76.2	91	82.2	337.1	358.1	352.4	361.3
1420425_at	Prdm1	NM_007548	0.20547	7.27831e-05	0.000791783	1.71634	6.37077	3.71183	38.5	38.9	31	30.5	45.4	43.4	38.1	111.5	179.9	203.4	269.3	232.3
1437540_at	Mcoln3	AV313762	0.58258	8.93554e-05	0.000112409	0.888412	3.29614	3.71014	6.7	7.1	5.2	4.3	5.1	7.6	3.2	4.8	19.1	15.8	19.9	22
1448183_a_at	Hif1a	BB269715	0.0153012	0.000180722	0.000131497	0.880614	3.26552	3.70823	155.3	153.7	159.5	137.1	129.5	130.7	139.3	133.8	418.2	534.8	432.4	592.2
1446559_at	D830016K09Rik	BB516556	0.155515	0.854775	0.00951925	0.292162	1.08314	3.70732	2	20.9	5.1	14.1	1.8	1.1	1.6	7.8	10.1	7.6	14	13.9
1436238_at	Lgi3	AI841179	0.0286706	0.0211751	0.00279126	0.547727	2.02955	3.70539	19.9	31.5	19.4	17.2	9.5	14.3	14.3	10.1	30.1	47.2	40	61.3
1419295_at	Creb3l1	BC016447	0.634209	4.57907e-07	1.342e-07	0.964549	3.57398	3.70533	171.3	229.9	221.4	189.8	198	182.9	199.9	202.8	675.7	747.2	758.2	722.4
1417822_at	D17H6S56E-5	NM_033075	0.0187657	2.33272e-05	1.20148e-05	0.789837	2.92085	3.69805	360.5	454.9	387.5	406.8	332.7	311.8	272.4	354.5	1095.7	1087.5	1160.9	1357.6
1456733_x_at	Serpinh1	BB329489	0.946038	1.27805e-07	3.14373e-07	1.00668	3.72074	3.69605	1955	1593.7	1837.8	1573.7	2036.4	1876.5	1688.9	1404.9	6172.4	6309.2	6671.3	6744.2
1459524_at	Mcc	C86509	0.147234	0.558094	0.000378775	0.336364	1.24318	3.69595	3.8	20.5	15.8	3.9	1.6	3.5	2.8	6.9	13	11.9	14.1	15.7
1438434_at	Arhgap11a	AV349116	0.144862	7.55266e-05	3.34674e-05	0.789611	2.91696	3.69417	172.9	120.3	119.8	162.6	118.5	143.3	89.7	103	369.1	449.6	385.3	475
1418603_at	Avpr1a	D49729	0.635009	0.000430042	0.000218662	0.878547	3.24177	3.68992	31.5	14	26.6	16	27.8	14.3	21.5	13.8	56	73.1	73	83.5
1435560_at	Itgal	BI554446	0.00942927	0.00042599	0.000182843	0.751465	2.77278	3.68983	100.4	86.9	106.1	82	76.2	66.8	73.6	65.5	286.2	302.7	197.8	254.2
1448992_at	Ina /// LOC100047943	BC018383	0.605916	0.010076	0.004307	0.802721	2.95918	3.68644	1.5	4.2	2.5	6.5	3.9	4.5	1.2	2.2	6.4	10.7	12.9	13.5
1424930_s_at	Fam83f	BC016600	0.2671	0.000659903	0.00695077	2.28082	8.40411	3.68468	5.6	1.8	3.1	4.1	3	5.4	5.5	19.4	26.1	27.2	43	26.4
1456147_at	St8sia6	BB486599	0.0416485	0.000252956	0.000110853	0.725536	2.67212	3.68297	71.4	67	67.9	50.2	58.3	34.4	47.8	45.6	139.4	172.2	203.6	170.2
1420713_a_at	Mdfi	NM_010783	0.246479	0.000152442	0.000926784	1.92323	7.08081	3.68172	14.4	3.9	25.3	5.9	31.2	41.2	11.6	11.2	76	79.7	109.3	85.5
1421438_at	Pcdhb14	BI734351	0.0738579	0.280714	0.00491273	0.370629	1.36364	3.67925	1.8	4	5.9	2.6	0.8	0.4	1.3	2.8	3.6	4.8	4.5	6.6
1456905_at	Ccdc24	BB018903	0.56368	0.011199	0.000986652	0.726845	2.67347	3.67819	7	19.8	5	31.9	16.3	18.1	8.3	3.6	37.6	48	34.3	50.4
1419410_at	Batf	NM_016767	0.673069	2.58741e-06	2.09372e-06	1.08731	3.99927	3.67814	40.6	42.9	31.8	21	49	27.1	36.1	36	142.7	139.4	127.2	135.8
1448250_at	9030425E11Rik	BG072972	0.302672	3.77524e-06	7.48273e-07	0.884856	3.25342	3.67678	336.6	349.6	405.4	252.8	320.8	284.7	319	265.1	1016	1102	1071	1184.9
1443218_at	---	BB206107	0.0345468	0.00389664	0.000714882	0.629338	2.31388	3.67669	38.9	31	36.1	20.8	19	23.1	15.7	22	94.9	77.6	60.1	60.8
1424757_at	BC018242	BC018242	0.326331	1.35126e-07	0.000240555	0.735195	2.70305	3.67664	30.1	29.9	30.4	27.8	36.5	26.1	22.6	1.7	79.2	84.8	77.2	78.3
1416527_at	Rab32	NM_026405	0.142388	0.00045753	3.44279e-06	0.681837	2.50665	3.67632	179	145.9	271.8	117.4	129.2	116.7	119.3	121.7	407.5	483.7	419.3	479.5
1446976_at	D7Ertd758e	BG069562	0.130918	0.523163	0.00221774	0.336449	1.23676	3.67593	2.1	4.8	11.3	13.9	1.6	1.6	6.6	1	10.6	9.9	10.8	8.4
1433525_at	Ednra	AW558570	0.154958	1.86647e-05	5.38913e-06	0.848986	3.12027	3.67529	109.1	133	141.4	94.6	99.2	99.5	109.5	97.7	404.2	326.1	396.8	364.7
1437284_at	Fzd1	BB259670	0.708391	1.86489e-06	2.21791e-06	1.01725	3.73851	3.67513	495.6	521.1	528.5	484.3	555.2	544.8	479.1	485.4	1782.6	2091.9	1768.4	1944.4
1438783_at	---	BB325257	0.00370831	0.00123673	9.83923e-05	0.568349	2.08529	3.66904	282.1	205.9	322.2	252	145.5	153.4	162.4	142.4	506.3	487.9	681.9	538.9
1422962_a_at	Psmb8	NM_010724	0.156543	1.06663e-05	4.27479e-06	0.865557	3.17509	3.66827	211.9	195.7	241.6	167.5	191.7	180.6	176.1	158.5	721.3	592.2	610.9	668.7
1419432_at	Spam1	NM_009241	0.907895	0.017152	0.00581213	0.915254	3.35593	3.66667	0.8	0.2	0.9	4	0.5	0.4	2.9	1.6	6.8	4	4.7	4.3
1432478_a_at	Rnf19b	AK015966	0.86959	1.12719e-05	1.21522e-05	1.01238	3.71094	3.66558	125.5	116.9	100.1	110	100.4	109.7	118.9	129.1	357.4	419.8	440.7	461.3
1455044_at	Tmem44	BB080090	0.301404	0.0022495	0.00670233	1.55828	5.70859	3.66339	8.9	4.9	11.2	7.6	9.6	15	22	4.2	36.5	48.4	34.4	66.8
1415971_at	Marcks	AW546141	0.757939	7.03796e-06	4.8688e-06	0.970244	3.55344	3.66241	824.4	953.1	1008.9	712.1	907.4	887.9	886.6	712.5	3000.9	3355.6	2761	3314.2
1415943_at	Sdc1	BI788645	0.274137	2.32743e-06	1.31052e-05	1.19803	4.38742	3.66219	543.1	451.6	531.2	464.2	610.3	521.7	443.8	808.4	1929.7	2152.4	2349.2	2300.1
1435938_at	Ckap2l	AA197362	0.896493	1.91247e-06	8.66364e-06	1.02007	3.73369	3.66022	79.9	73.7	62.8	82.5	65.3	69.8	63.4	106.4	276	308.6	259.3	272.1
1443303_at	---	BB530192	0.982377	0.00091933	0.00126862	1.00625	3.68125	3.65839	5.8	3.9	3.1	3.2	2.9	3.8	2.8	6.6	18.2	16.1	14.2	10.4
1416431_at	Tubb6	NM_026473	0.0411329	1.05567e-05	7.88942e-06	0.846201	3.09535	3.65794	567.9	520.5	596.7	612.7	545	512.8	467.7	418.9	1588	1839.1	1695.6	1989.8
1418195_at	Galnt10	BG965198	0.834996	3.93858e-07	2.70443e-07	1.02196	3.73809	3.65775	134.7	124.6	130	93.3	141.7	129	117.2	105.3	451.2	476.5	424.9	451.4
1435024_at	4931428F04Rik	BG808712	0.164889	0.000174914	0.000206446	0.751171	2.74716	3.65717	38.4	30.7	40	40.4	26.2	41.7	29.1	15.3	80.3	108.6	107.4	114.4
1416129_at	Errfi1	NM_133753	0.00407028	0.0131492	0.000229914	0.457587	1.67332	3.65683	2981.2	2087	3277.5	2084	1194.4	1220.2	1026.3	1331.6	4881.4	4175.1	5081.8	3313.9
1446963_at	---	BM117069	0.811934	0.0002275	0.000203364	0.969048	3.54286	3.65602	29.4	27.7	40.2	28.7	37	32.2	27.9	25	102.5	114.7	137.4	91.8
1449370_at	Sox4	AI428101	0.0929284	3.93068e-06	4.09601e-06	1.12765	4.12263	3.65593	95.7	75	98	89.3	104	96.7	106.2	96.8	322.2	368.7	385.7	399.3
1437451_at	Ecscr	BB736636	0.574847	7.13677e-07	5.21221e-07	0.967402	3.53659	3.65576	156.1	148.8	176.5	144.4	155.7	159.7	152.5	137.5	512.1	541.7	566.2	593.2
1427655_a_at	A630038E17Rik	M37694	0.866356	0.00361862	0.00424788	0.944576	3.4521	3.65465	25.2	47.6	21.6	31.9	44.6	40.4	25.6	8.7	155.5	101.3	89.9	89.3
1438620_x_at	Sfrp1	BB497685	0.672252	0.00118488	0.000800984	0.929757	3.39719	3.65385	70.6	73.7	52.5	38.1	46.4	63.5	59.6	48.9	263.5	185.5	194.2	154.8
1452803_at	Glipr2	BM208214	0.949349	1.62408e-05	2.50415e-05	1.006	3.67401	3.65208	96.3	97.2	106.4	99.8	121.6	93.4	106.4	80.7	315.5	417.8	357.3	377.9
1448635_at	Smc2	NM_008017	0.591054	7.87515e-05	7.61476e-05	0.964915	3.52145	3.64949	165.8	139.7	146.9	149	151.5	138.1	128.3	162.4	439	512.2	535.5	631.1
1434450_s_at	Adrbk2	BG073639	0.326638	9.78667e-05	6.06028e-05	0.886503	3.23401	3.64805	112	128.7	129.1	86.6	90.6	101.3	92.2	120.5	313.8	335.5	407.1	419.6
1438052_at	A130071D04Rik	BM239436	0.15102	0.00394642	0.00269735	0.776739	2.83126	3.64505	41.9	45.8	52.9	52	38.7	32.9	53.2	24.8	140.7	152.3	81.6	170.7
1431182_at	Hspa8 /// LOC624853 /// LOC641192	AK004608	0.0414941	0.00131393	0.000799248	0.720688	2.62585	3.64353	47.3	47.2	47.2	50.2	33	22.5	35.3	47.5	155.2	92.7	115.6	140.4
1452912_at	Dscc1	AK011162	0.9235	0.000393699	0.000303505	1.01622	3.7009	3.64184	17.3	13.3	16.4	8.5	13.3	11.5	15.6	16	38.1	58.7	49.8	58.8
1427347_s_at	Tubb2a	BC003475	0.486464	6.91891e-06	3.42189e-06	0.925907	3.37001	3.63968	630.9	420.8	596.5	531.5	501.4	453.9	477	585.9	1669	1755.3	2010.2	1911.1
1440344_at	Snord89	BB535821	0.281707	7.70299e-05	9.01822e-05	1.2788	4.65438	3.63964	9.5	16.5	10.5	6.9	15.4	10.9	11.7	17.5	55	55.2	39.8	52
1432329_a_at	Matk	AK018182	0.284616	0.000181399	0.000165564	0.809484	2.94592	3.63926	35.1	28.2	33.8	23.1	16.7	32.9	18.3	29.4	75.7	83.5	106.8	88.1
1417938_at	Rad51ap1	BC003738	0.454934	3.59271e-05	7.55422e-05	1.12905	4.10617	3.63682	41.5	30.9	43.4	41.5	35.2	44.1	37.8	60.5	137.5	150.4	171.7	186.3
1417976_at	Ada	NM_007398	0.567375	6.71466e-06	4.82224e-06	0.950061	3.45436	3.63593	66.6	59.4	68	50.3	57.4	50	64	60.7	199.2	198.4	207.5	238.8
1449509_at	Serf1	NM_011353	0.897003	0.000495067	0.000388578	0.975051	3.54366	3.63434	109.5	99.3	51.2	84.7	110.8	66.5	75.3	83.5	254.1	370.3	256.2	340.9
1450843_a_at	Serpinh1	BI220012	0.323346	2.98239e-08	4.52008e-08	1.04383	3.79173	3.63253	2231.9	2061.7	2129.8	2016.9	2374.1	2248.2	2033.5	2154.4	8303.9	8113.5	7568	8017.9
1426063_a_at	Gem	U10551	0.0225557	0.000100174	4.45526e-05	0.722364	2.62287	3.63096	107.9	110.2	138.6	113.7	79.3	72.1	108.4	80	328.7	327.9	328.1	249.1
1417065_at	Egr1	NM_007913	0.0138475	0.0426286	0.00933131	0.569861	2.06899	3.63069	2117.6	1193.6	1801.2	1432	931.5	886.6	996.2	915.1	4071.5	2790.6	4797.6	1880.6
1446422_at	---	BB502175	0.451267	0.000167732	6.69095e-05	0.859363	3.11991	3.63049	31.8	40.6	42	20.7	32	22.9	24.4	36.8	92.3	125.5	100	103.7
1435120_at	---	AV300631	0.259596	7.55761e-06	9.79056e-06	1.15704	4.19946	3.62949	59.3	58.1	63.5	40.7	61.2	74.3	52	68.9	212.6	247.3	213.8	256.9
1417926_at	Ncapg2	NM_133762	0.168136	1.52977e-06	1.35462e-06	0.907069	3.29217	3.62946	131.9	142.3	151.2	127.7	136.4	124.4	108.2	132.7	443.5	438.5	435.5	503.4
1455962_at	Hhat	BB751267	0.0335582	1.71872e-05	1.166e-05	0.843238	3.05943	3.62819	50.2	48.4	52.7	43.9	40.2	43.7	45	35.7	143	162.7	129.8	161.7
1453924_a_at	Ptgfr	AK014673	0.0576785	1.10016e-06	7.22473e-07	0.903196	3.27583	3.62693	73.2	86.7	82.5	79.9	75.5	71.3	75.8	68.5	258.5	273.3	241.8	282.2
1419631_at	Was	NM_009515	0.0638257	4.09178e-05	1.94119e-05	0.844394	3.06183	3.62607	114.3	110.2	145.1	115.6	109	101.3	99.2	100.2	398.2	388.2	305.3	393.9
1437072_at	Arhgap25	BM241218	0.200245	3.59067e-05	2.16885e-05	0.878058	3.18387	3.62603	79.1	60.4	60.8	61.3	54.7	63.9	61.1	50	237.6	196.8	181	217.5
1434129_s_at	Lhfpl2	BG917242	0.796396	0.000109598	7.66002e-05	1.04182	3.77749	3.62585	163.4	113.3	210.9	131.7	152.8	180.8	177.3	134.3	497.1	671.5	525.8	645
1454488_at	4930534I15Rik	AK015964	0.0111969	0.528642	0.00141519	0.312766	1.13404	3.62585	8.4	17.3	11.3	10	6.8	3.6	2.5	1.8	11.8	12.4	17.3	11.8
1418261_at	Sykb	AW907526	0.0400771	3.63372e-06	5.0525e-07	0.798378	2.89477	3.62582	290.8	221.4	252.3	209.6	208.6	187	188.5	193.6	751.7	731.6	656	680.5
1454978_at	Ttyh3	BQ180649	0.503614	0.000178223	9.0098e-05	0.873861	3.16603	3.62303	76.3	130.5	126.6	160.5	91.4	147.2	93.2	99.8	341.3	379.5	373.1	469.8
1455990_at	Kif23	AW986176	0.172818	6.16262e-06	8.22351e-06	0.863671	3.12865	3.6225	62.1	62.1	71.9	64.3	51.6	46	56.8	70.5	186.7	191.4	226.4	210.2
1453279_x_at	Krt76	AK009075	0.281551	0.0283461	0.00136485	0.56962	2.06329	3.62222	1.6	3.8	1	1.5	0.8	0.8	2.2	0.7	3.7	4.5	3.2	4.9
1447709_at	2410021H03Rik	BB000243	0.0892436	0.280113	0.00623697	0.391941	1.41941	3.6215	4.7	11.1	16.4	22.4	5.5	9.8	2.6	3.5	12.2	26.4	17.5	21.4
1418538_at	Kdelr3	NM_134090	0.256646	1.11018e-05	1.04044e-05	0.922911	3.33904	3.61795	616.8	601.2	702.1	631.5	661.1	600.1	589.5	504.2	1853	2058.8	2338.4	2269.7
1457269_at	Gm1123	AV289181	0.0168822	0.186337	0.00940871	0.400407	1.44817	3.61675	25.7	16	34	22.7	5.2	12.8	6	15.4	25.5	27.3	36.3	53.4
1441113_at	A430071A18Rik	BB205989	0.140298	0.000609452	0.0038445	2.4375	8.8125	3.61538	1.4	0.7	3	1.3	1.8	6.6	1.7	5.5	13.3	16.9	9.2	17
1446498_at	Il20ra	BB551879	0.44912	0.00177299	0.00163934	0.9025	3.26	3.61219	10.9	10.7	8.9	9.5	7.8	6.6	10.3	11.4	22.3	29.8	36.6	41.7
1451174_at	Lrrc33	BC027411	0.0405772	3.28155e-05	9.03403e-06	0.786138	2.83921	3.61159	317.5	223.6	290.3	246.4	224.3	221.8	201.9	199.3	688.4	839.6	705.4	826.7
1422062_at	Msr1	BC003814	0.746657	2.39534e-07	7.62281e-07	0.952053	3.43811	3.61126	97.5	63.5	79.3	78.8	87.1	76.2	89.8	50.7	279.8	279.2	271.1	267
1429753_at	Nxph4	AK004130	0.738853	0.0010738	0.00160702	1.07461	3.87827	3.60901	18.1	15.3	24.3	18.7	15.6	16.1	31.1	19.3	54.8	73.5	69.2	98.8
1422602_a_at	Wnt5b	NM_009525	0.738567	0.00142398	0.000892369	0.914634	3.29756	3.60533	27.9	27	13.3	13.8	23.4	24.4	13.2	14	57.7	66.5	57.2	89
1429049_at	Nuak2	AK004737	0.16041	2.12743e-05	7.1919e-05	0.759329	2.73717	3.60472	159.7	161.9	148.9	143.2	105.1	95.8	82.2	182.9	405.4	420.6	479.2	374.6
1422836_at	Mbnl3	NM_134163	0.551385	7.42183e-05	1.72914e-05	0.88	3.172	3.60455	10.1	10.6	10.7	18.6	10.9	14.3	8.4	10.4	35.4	37.2	42.7	43.3
1417599_at	Cd276	NM_133983	0.922123	5.50735e-06	3.94851e-06	1.01287	3.64628	3.59994	207	154	195.8	134.7	158.8	178.9	211.8	150.9	563.2	630.4	642.9	684.9
1416303_at	Litaf	AV360881	0.609781	5.15182e-07	9.16677e-08	0.957386	3.44629	3.59968	851.5	634.1	832	665	745.9	746.4	676.8	686.4	2462.4	2729	2501.4	2586.1
1437675_at	Slc8a1	BB522674	0.0397459	4.65823e-05	1.95971e-05	0.698086	2.51099	3.59695	31.6	32.2	43.3	34	17.2	23.3	31.7	26.3	75.8	93	90.6	94.9
1452014_a_at	Igf1	AF440694	0.0113783	9.69939e-06	1.4672e-05	1.27691	4.59018	3.59475	651.9	712.2	863.7	745.7	981.1	1030.2	920.1	865.5	3125.3	3825.8	3053	3644.8
1435460_at	Prkg2	BB363188	0.549197	7.83857e-06	9.58351e-06	1.06498	3.82788	3.59432	58.7	53.6	44	45.3	57.9	42.6	59.3	54.9	198.8	167.3	193.1	212.5
1425407_s_at	Clec4a2 /// Clec4b1	BC006623	0.00439398	7.9024e-08	1.99387e-07	1.29536	4.65345	3.59239	129.8	110.5	119.6	116.8	162.1	135.8	152.8	166.8	572.2	554.5	516.2	575.4
1448941_at	B4galt2	AW125856	0.387665	0.00241696	0.000950369	0.808327	2.9038	3.59236	49.4	19.2	38.3	32.4	28.4	36.1	19.3	28.8	70.9	102.1	103.9	127.6
1433600_at	Adra2a	BB262415	0.645168	3.98047e-05	4.29268e-05	1.04077	3.73844	3.59201	88.4	99.5	100.6	77	110	94.4	91.1	84.9	301.6	373.4	303.4	388
1449797_x_at	---	AV354142	0.0079344	0.541161	0.00550247	0.320449	1.15087	3.59144	23.5	24.5	21	11.2	11	6.5	5.4	2.8	19.8	16.8	22.6	33.1
1440907_at	H2-Eb2	BE692038	0.121181	0.0570566	0.00210487	0.465986	1.67347	3.59124	14.6	14.2	22.6	36.8	21.7	7.3	6.7	5.4	32	44.7	40.7	30.2
1425015_at	Ephb2	AV221401	0.870894	4.32893e-05	4.66093e-05	1.02404	3.6772	3.59088	42.2	41.4	35.4	26.6	47.8	33	31.4	36.9	121.9	154.4	117.9	141.2
1419192_at	Il4i1 /// Nup62-il4i1	NM_010215	0.305217	0.00159083	0.000696574	0.664275	2.38451	3.58963	26.6	19.1	10.8	13.2	10.8	2.1	20.9	12.5	40.3	35.4	48.4	42.1
1425379_at	Hgf	D10212	0.709744	0.00340307	0.00302046	0.889423	3.1875	3.58378	21.1	30.9	19	12.2	11.3	12.7	19.2	30.8	43.1	62.8	84.6	74.7
1428733_at	Gngt2	AK010554	0.147098	1.77402e-06	1.12906e-06	0.839164	3.00682	3.58311	63.5	48.9	59.2	48.5	45.5	55.5	37.1	46.6	169.1	172.1	151.3	169.3
1423523_at	Aass	BF687395	0.00977412	0.00863209	0.000590081	0.463816	1.66118	3.58156	9.7	6.8	7.2	6.7	2.9	4.1	5.5	1.6	9.6	13	14.9	13
1427418_a_at	Hif1a	X95580	0.211738	9.18509e-08	6.63432e-10	0.899515	3.21561	3.57483	2038.4	1474.4	1811.1	1648.3	1471.3	1555.2	1622.6	1622.5	5569.3	5660.8	5490.3	5699.5
1420590_at	Has1	NM_008215	0.0599867	0.0012282	0.000170857	0.673701	2.40747	3.5735	416.4	281.1	540.1	368.9	295.3	244.5	304.6	237.9	1061.1	1120.9	938.9	746.7
1439562_at	F730047E07Rik	BG071041	0.794644	3.54667e-05	9.28013e-06	0.939367	3.35501	3.57156	25.3	21.4	43.7	23.4	31.3	18.7	22.4	34.5	86.8	102.8	94.3	97.9
1415801_at	Gja1	M63801	0.269312	1.44973e-06	1.12688e-06	0.939285	3.35285	3.56958	379.6	356.7	337.4	316.4	310	357.7	313.3	324.7	1148.2	1064.2	1185.5	1262.9
1424832_at	Cd300ld	BC019814	0.0814652	3.26884e-05	1.88412e-05	0.850542	3.03518	3.56852	150.9	129.3	113.7	132	109.7	116.4	123.5	97.7	442.3	435.2	361.4	357.3
1421242_at	Rnf144a	AI414399	0.0287172	0.0127023	0.00110014	0.533434	1.90297	3.56739	29.9	54.1	53.4	61.5	33.9	15.2	32.6	24.4	76.7	109.4	75.5	116.9
1424304_at	Tpcn2	BC025890	0.0715613	7.19874e-05	3.01575e-05	0.822011	2.93158	3.56635	112.9	82.6	116.8	98.4	85.7	79.6	79.7	92.6	317	347.4	272.4	267.2
1450446_a_at	Socs1	AB000710	0.883599	0.000769322	0.000656457	1.0309	3.67468	3.56453	33.3	31.3	15	36.9	21.9	37.3	27.7	33.2	97	130.9	80	120.2
1442934_at	C81608	BG067071	0.0441812	0.514025	0.00606744	0.343454	1.22391	3.56354	13.2	18.9	16.7	3.9	4.4	2.7	6.7	4.3	12.6	18.5	10.9	22.5
1429346_a_at	Cep72	BB733638	0.880506	0.00319723	0.00416766	1.0625	3.78472	3.56209	5.4	3.9	12.5	7	11.1	9.3	1.3	8.9	17.8	26	29.1	36.1
1448289_at	Crmp1	AB006714	0.769753	0.00140989	0.000522369	0.916286	3.26332	3.56146	24.5	5.5	18.9	16.8	16.7	14	9.9	19.6	51.3	67.9	42.1	53.1
1416893_at	Fam107b	BC021353	0.294555	0.000374849	0.000289659	0.904329	3.21726	3.55762	107.3	88.2	85.3	81.9	69.8	79.1	93.1	86	211.3	330.9	322.9	301.8
1445707_at	Gm5509 /// Zdhhc6	BB070860	0.182526	0.322434	0.00463082	0.410468	1.46006	3.55705	10.1	17.6	7.3	1.3	4	5.1	5.2	0.6	9.4	17.1	15.8	10.7
1418751_at	Sit1	NM_019436	0.0287602	0.91525	0.00957835	0.273038	0.97099	3.55625	10.4	24.3	12.5	11.4	7.9	0.6	6.3	1.2	15	12.4	10	19.5
1423809_at	Tcf19	BC004617	0.514427	6.09079e-06	6.99117e-06	0.935169	3.32357	3.55398	130.9	144.3	110	126.9	119.9	112.6	100.3	146.1	393.6	400.8	430.9	476.7
1440216_at	Ifitm5	AW213665	0.722419	0.00186725	0.00184905	0.964438	3.42675	3.55311	162.1	149.4	144.8	131.4	168.2	153.9	110.5	134.2	326.1	571.9	479.9	636
1418322_at	Crem	AI467599	0.058031	0.000139203	9.27402e-05	0.881742	3.13261	3.55275	54.6	51.3	52.8	43.4	46.4	43.7	43.5	44.6	150.4	189.1	130.2	163.4
1449267_at	Chid1	BC006876	0.0680061	7.12094e-06	7.53155e-06	0.811195	2.88139	3.55203	119	112.9	99.7	118.6	111.8	88.7	93.9	70.8	298.1	324.4	311.5	363.2
1425613_at	Pcdha11	BB265776	0.234592	0.061905	0.00595452	0.536993	1.90692	3.55111	7.5	3.6	17.4	13.4	7.2	10.6	2.8	1.9	20.5	26.2	12.6	20.6
1429326_at	Cenpl	BB538449	0.130286	0.000551343	0.000301934	0.808883	2.87214	3.55075	16.5	17.5	23.2	17.1	16	12.1	18.1	13.9	44.8	52.1	48.9	67.6
1421578_at	Ccl4	AF128218	0.379167	0.00364538	0.00246257	0.881736	3.12876	3.5484	68	39.9	47.1	54.7	44.5	41.3	53.4	45.7	223.4	179.3	121.8	131.6
1427061_at	Rbbp8	BB167067	0.458842	4.53198e-05	4.07185e-05	0.913146	3.23762	3.54556	143.5	150.9	146.6	108.2	157.6	104.7	115.4	123.8	368.2	500.2	447.8	461.9
1452305_s_at	Cenpn	BM230253	0.577086	0.000678751	0.00104051	0.884003	3.13419	3.54545	29.4	32.6	32.7	37.2	32.6	25.6	14.2	44.2	74.7	100.4	112.6	125.7
1459306_at	---	BB200000	0.0797177	0.0756002	0.000900468	0.43454	1.54039	3.54487	6.4	8.7	14.8	6	6.2	2.9	0.7	5.8	13	12.7	16.8	12.8
1450967_at	Ptplad2	AV291250	0.0604026	2.29989e-06	1.87985e-06	0.903424	3.20246	3.5448	285.1	255.1	288.3	278.4	271.8	251.3	248.2	228.7	824.6	956.9	830.7	932.6
1415804_at	Cx3cl1	AF010586	0.825866	0.00108728	0.000957672	1.08909	3.86	3.54424	10.5	7.1	25.6	11.8	14.4	14	24.1	7.4	59.2	62.9	51.4	38.8
1436808_x_at	Mcm5	AI324988	0.653772	2.6066e-05	5.35543e-05	1.05562	3.7413	3.54419	134.6	146.2	138	138.6	177.4	129.6	110.2	171.2	448.4	482	579.7	575.3
1437385_at	Ccbe1	AV264768	0.162011	3.97256e-05	9.00154e-06	0.790563	2.80188	3.54415	110.1	83.4	133.6	88.3	97.2	75.8	90.8	64.6	317.6	267.1	269.4	309.8
1437811_x_at	---	AV312368	0.0406199	1.23404e-06	6.16214e-07	0.846509	2.99659	3.53994	228	188.2	215	191	182.7	189.8	157.6	165.9	614	634.6	564	651.2
1450677_at	Chek1	NM_007691	0.136148	8.28356e-05	0.000107114	0.723824	2.56146	3.53878	15.5	18.7	18.3	13.4	8.3	16.2	7.5	15.7	46.5	35.5	41.8	45
1430886_at	1700112E06Rik	BB246912	0.741775	0.00226334	0.00333351	1.08696	3.84561	3.53796	22.4	23.7	28.4	38.2	31.6	26.9	46.7	17.3	132.4	137	77.2	86.8
1436649_at	Ikzf3	BB151746	0.00582445	0.0560558	0.00121223	0.424342	1.5011	3.53747	24.2	20.7	16.7	29.6	11.2	5.4	12.5	9.6	45.2	32.5	26.1	33.1
1423125_at	Dclk1	BQ174703	0.14836	0.0211221	0.00592052	0.578035	2.04432	3.53667	8.7	12	18.9	12.3	13	8.4	7.8	0.8	19	34.1	21	32
1415811_at	Uhrf1	BB702754	0.226201	0.000241784	0.000535654	1.30427	4.61023	3.5347	38.1	29.9	22	29.3	34.8	32.8	31.6	56.4	135.4	113.6	125.3	175.7
1451358_a_at	Racgap1	AF212320	0.69415	5.92051e-05	4.01906e-05	0.951642	3.36359	3.53452	58.1	61.6	39	60.5	60.2	43.3	50.1	55	154.8	175.6	201.2	205.7
1418826_at	Ms4a6b	NM_027209	0.120656	1.67959e-05	7.19294e-06	0.856964	3.02804	3.53344	595.7	466.6	649.4	528.3	489.1	527.7	434.5	468.3	1860.5	1777.2	1478.9	1666.2
1450993_at	Pask	BB729869	0.416703	0.0200446	0.0011152	0.655682	2.31591	3.53206	11.9	39.7	6.3	30.1	22.9	9.5	6.5	18.8	48.1	41.9	48.8	65
1459546_s_at	Enpp1	C76301	0.0482573	2.25941e-05	3.9787e-06	0.744803	2.63054	3.53186	653.8	450.4	692.6	632.7	445.7	476.5	520	367.3	1455.1	1564.6	1766.9	1604.3
1453769_at	Ckap2l	BI466124	0.349486	0.00144979	0.00175671	1.08019	3.81496	3.53176	34.3	33.2	32.4	29.8	38	29.4	32.9	39.8	80.9	124.7	128.3	160.9
1451775_s_at	Il13ra1	S80963	0.383116	1.177e-06	1.64157e-06	1.07762	3.80585	3.53171	143.6	152	136.7	117.8	166.4	154.9	125.2	146.3	488	567.3	498.6	539.7
1429571_a_at	Spaca1	AK006187	0.759694	2.84779e-05	6.36396e-06	0.947368	3.34398	3.52976	13.1	18.8	9.8	11.5	12.4	15.3	12.1	10.6	39.2	47.4	43.9	47.4
1424265_at	Npl	BC022734	0.933552	9.66998e-07	1.4496e-06	1.01211	3.5718	3.52906	110.5	139.9	123	89	151	98.9	116.9	101.2	441.4	407.9	408.8	393.5
1458207_at	---	BB180782	0.207232	0.150121	0.006719	0.465385	1.64231	3.52893	10.7	9.1	4.8	1.4	6.2	0.3	1.9	3.7	12.5	7.5	13.5	9.2
1449268_at	Gfpt1	AF334736	0.0397259	0.000208787	5.29359e-05	0.709003	2.50161	3.52834	56.5	36	49.1	45	28.8	32.3	41.6	29.6	104.2	122.7	104.2	135.7
1459729_at	Slc13a5	BE979238	0.0118395	0.0417243	0.00593722	0.501351	1.76877	3.52802	52.5	54.1	38.7	39.8	24.7	34.9	10.4	22.8	43.5	92.2	88.4	103.3
1427452_at	Gm5045 /// Gm6274 /// Rpl7	X57960	0.602957	0.0103975	0.00676215	0.866055	3.05229	3.52436	26.6	13.2	39.5	29.7	26	25.7	12.5	30.2	122.2	55.9	84	70.6
1454737_at	Dusp9	AV295798	0.1589	0.020378	0.00828067	0.615385	2.16722	3.52174	8.6	5.6	9.7	6	6.9	3.5	0.9	7.1	9.4	16.6	16.7	22.1
1460377_a_at	Tmem8	BC005722	0.214382	9.12247e-06	1.33027e-06	0.824804	2.90367	3.52044	29.7	49.7	39.7	47	35.5	40.2	27	34.3	115.6	125	113.4	128.3
1452117_a_at	Fyb	BB157866	0.147993	3.25532e-05	1.87082e-05	0.874213	3.07686	3.51958	177.7	163.3	146.3	132	139.1	149.2	133.7	119.4	545.8	490.9	448.6	420.2
1459250_at	Tshz2	BB335968	0.147943	0.264037	0.00727161	0.404192	1.42216	3.51852	15.4	8.3	4	5.7	6.5	5.9	0.5	0.6	15.4	9.6	9.8	12.7
1416304_at	Litaf	AV360881	0.266901	1.35192e-06	2.74654e-07	0.907911	3.18821	3.51159	340.9	263.9	246	289.4	248.2	275.2	253.4	258.4	881	943	851.8	959.4
1417392_a_at	Slc7a7	NM_011405	0.0117872	1.9425e-06	1.85521e-06	0.779672	2.73617	3.50939	116.2	105.2	117.9	118.2	93	104.9	83.3	75.5	311.2	320.6	284.7	335.3
1428135_a_at	Eef1d	BB292776	0.0421978	0.00984598	0.00066889	0.52581	1.84394	3.50685	19.9	12.9	27.5	23	14.4	13.7	11.4	4.3	30.9	45.9	43	33.8
1416118_at	Trim59	NM_025863	0.164947	9.16558e-06	1.8487e-05	1.18597	4.15736	3.50546	32.2	42.3	34.5	37.8	34.8	41.9	44.6	52.8	150.5	138	146.1	175.7
1430310_at	Tspan11	BB535262	0.285647	1.19588e-05	8.58426e-06	0.894452	3.13509	3.50504	107.9	123.6	120.3	91.6	110.6	110.6	92.2	83.2	315.7	393.8	340.2	340.4
1423722_at	Tmem49	BC004013	0.186108	6.34309e-08	1.70618e-08	0.931918	3.26419	3.50266	791	653	681.4	738.8	656.7	700.6	658	653.9	2327.5	2400.8	2226.3	2394.7
1425519_a_at	Cd74	BC003476	0.00346772	1.92339e-06	6.5556e-07	0.781067	2.73521	3.50188	2196.4	2035.8	2441.8	2098.1	1736.8	1769.8	1783.6	1561.4	6408.7	6242	5704.7	5638.1
1429417_at	Chsy3	AK019528	0.0877445	0.00212947	0.000294319	0.627427	2.1966	3.50097	26.1	15.9	25.6	14.8	8.1	11.4	13.5	18.7	42.6	45.6	37.6	55.2
1415836_at	Aldh18a1	NM_019698	0.0538721	1.90804e-05	8.30516e-06	0.81117	2.83841	3.49916	142.3	171.2	125.7	148.1	120.5	106.2	112.3	137.4	378.3	407.2	407.9	473.6
1420421_s_at	Klrb1b	NM_008526	0.00173342	0.000350108	5.17433e-05	0.529747	1.8533	3.49846	29.5	35	30	28.2	20.2	17.6	17.4	9.8	56.8	63.2	47.8	59.6
1450034_at	Stat1	AW214029	0.63371	8.20897e-05	8.39139e-05	0.966493	3.38091	3.49812	161.3	170	145.3	156.1	162.4	173.1	144.2	131.8	529.3	513.6	453	643.2
1455019_x_at	Ckap4	BB818012	0.408136	2.67394e-06	8.0802e-07	0.926137	3.23909	3.49742	2345.2	1716	2455.4	2056	2166.9	1996.1	1888.6	1887.8	6280.6	6989.1	7286.1	7211.6
1420538_at	Gprc5d	NM_053118	0.190841	0.902788	0.00075949	0.267699	0.935841	3.49587	27.3	10.6	4.4	2.9	2.5	4.1	3.7	1.8	10.4	12.4	11.9	7.6
1421392_a_at	Birc3	NM_007464	0.302749	1.39974e-05	2.9483e-06	0.868895	3.03718	3.49546	232.8	218.7	341.5	296.2	270.8	220.9	209.2	245.5	897	866.8	760.7	783.6
1424529_s_at	Cgref1	BC023116	0.236024	0.000113851	7.83815e-05	0.885363	3.0943	3.49495	260.8	189.8	213	231.4	214.1	208.4	208.9	161	564	679.6	808.5	717.3
1455529_at	Mex3a	BE951772	0.187059	5.3573e-05	4.74265e-05	0.761535	2.66149	3.4949	42.2	60.9	59.3	43.5	39.8	57.3	32.4	27.3	118.2	148.3	136	145.5
1435497_at	5730590G19Rik /// LOC100047683	BM227301	0.605833	0.000100002	0.00141581	1.27273	4.44444	3.49206	4.5	6.3	6.5	2.5	13.1	5.1	3.6	3.4	19.6	19.6	22.3	26.5
1418099_at	Tnfrsf1b	M60469	0.00107114	2.03887e-05	1.27597e-05	0.814543	2.84374	3.49121	225.6	225	222	214.4	198.1	176	181.2	167.2	709.2	647.7	545.2	620.3
1419603_at	Ifi204	NM_008329	0.384646	0.00205164	0.000280834	0.792325	2.76599	3.49098	27.6	32.4	53.6	19.3	26.4	26.6	28.2	24.1	113.8	95.7	73	85.1
1434350_at	Csrnp1	BG070296	0.0542693	0.00700993	0.000291048	0.578273	2.01814	3.48994	189.6	108.3	118.7	90.6	57.1	77.1	77.7	81.4	265.6	241.5	315	201.5
1448010_at	A430104N18Rik /// Mir142	AA254104	0.17091	4.64148e-05	1.82533e-05	0.752546	2.62627	3.48985	33.5	60.2	52.7	50	49.4	26.1	29.9	42.4	137.9	134.1	114.1	129.7
1448124_at	Gusb	NM_010368	0.0418084	4.52799e-07	2.51059e-07	0.851701	2.97182	3.48928	533	465.3	535.3	574.3	476	488.8	403.5	427	1480.6	1547.6	1565.7	1670.4
1422507_at	Cstb	NM_007793	0.387008	3.94841e-08	1.12815e-07	1.08011	3.76844	3.48895	782	652.4	821.7	708.6	764	752.8	732.3	953.1	2720.1	2707.5	2864.3	2880.4
1426714_at	Slc46a1	AK003278	0.333877	0.000243103	0.000272325	1.32325	4.61627	3.48857	24.6	19.7	40	11.6	33.9	36	19	38	99.5	93.4	113.8	136
1447862_x_at	Thbs2	BB233297	0.468566	1.09447e-05	7.72628e-06	0.934666	3.25915	3.48696	367.3	304.2	291.2	272.5	284.2	306.6	318.3	245.4	1013.5	958.5	916.1	1137.6
1430373_at	5430427O19Rik	AI645098	0.136551	0.000157985	0.000130579	0.671053	2.33732	3.48307	23.1	14.6	20.4	25.5	23.6	10.4	12.4	9.7	54.2	47.1	43.2	50.9
1436100_at	Sh2d5	AV347995	0.436461	1.53391e-05	0.000109885	1.23348	4.29075	3.47857	13.3	7.5	13.4	11.2	13.3	19.5	6.3	16.9	53.6	46.4	42.4	52.4
1437325_x_at	Aldh18a1	BB251523	0.293129	1.05262e-05	5.96385e-06	0.92564	3.21664	3.47505	347.5	282.1	375.4	315.6	303.1	287	314.5	317.8	968	1027.3	1205.1	1047.5
1421352_at	Tlr6	NM_011604	0.416622	0.000557185	0.000164989	0.840659	2.91994	3.47339	19.7	27.1	43.1	37.5	28.5	19.3	30.7	28.6	74.2	97.7	89.8	110.3
1441081_a_at	1110038B12Rik	BE133150	0.829926	4.75373e-05	4.01363e-07	0.953598	3.31113	3.47226	477.9	193.3	291.7	250.4	281	318.9	294.9	262.2	991.1	1019.3	936	1071
1422041_at	Pilrb1	NM_133209	0.982528	3.44262e-05	0.000130774	1.00405	3.48618	3.47211	99.1	105.6	109.8	105.1	155.3	82.3	110.7	73	379.7	392.3	295.3	395.5
1436707_x_at	Ncaph	BB725358	0.186375	1.93002e-05	2.98725e-05	1.14236	3.95986	3.46637	69.1	87.4	76.3	86.1	95.2	83.3	79	106.8	290.2	322	283.7	366.9
1436618_at	Sfxn5	BB379739	0.760992	1.4825e-06	7.63171e-07	0.975874	3.38186	3.46547	64.4	62.6	48.3	65.1	52.5	58.2	62.2	61.7	192	221.3	195.7	204
1449580_s_at	H2-DMb1 /// H2-DMb2	NM_010388	0.0327826	5.18613e-07	2.73505e-08	0.788472	2.73194	3.46485	121.3	138.1	160	121.9	115.7	105.9	112.1	93.1	366.4	384.2	359.8	368.4
1433147_at	Cald1	AK014755	0.519634	0.00472827	0.00422157	0.954634	3.30659	3.46372	107.5	103	113.7	85.8	91.2	97.2	96.3	106.7	319	292	494.6	250.1
1447877_x_at	Dnmt1	BB116018	0.786466	0.000153521	2.19825e-05	0.923636	3.19818	3.4626	61.6	26.9	52.8	23.7	52.2	33.9	24.3	42	123.6	131.8	146.8	125.5
1460471_at	Ooep	BB702364	0.103935	0.00108257	0.000465626	0.774049	2.68009	3.46243	38	56.9	45.1	38.8	39.8	27.3	39	32.3	91.3	108.9	135.7	143.3
1456619_at	Liph	BM204375	0.101786	0.65392	4.7543e-05	0.235294	0.814241	3.46053	13.5	1.9	13.6	3.3	1.7	1.8	3	1.1	6.4	6.1	7.1	6.7
1430244_at	4921509J17Rik	BB084986	0.368072	0.120056	0.000418966	0.536232	1.85507	3.45946	0.9	8	2	2.9	3.1	0.9	2.1	1.3	7.5	6.4	6.3	5.4
1418747_at	Sfpi1	NM_011355	0.0147065	3.21729e-07	2.87989e-07	0.845692	2.92453	3.45814	207.6	196	221.9	207.9	195.6	165	182.3	161.9	567.6	603.1	631.1	635.5
1438407_at	Dsel	AV336691	0.0927522	2.24927e-05	5.03144e-06	0.791796	2.73699	3.45669	925.7	677.3	1020	772.7	686.2	608.5	792	602	2413.6	2532.6	2072.2	2275.6
1457404_at	Nfkbiz	BM240058	0.436757	4.19027e-05	7.13396e-06	0.864078	2.98403	3.45343	143.4	85.2	145	89.9	97.3	99.3	79	124.9	373	314.5	366.7	328.9
1426341_at	Slc1a3	BB357585	0.94505	0.000204843	3.7237e-06	0.976577	3.37237	3.45326	60.2	47.8	52.7	5.8	43.1	56.2	29.4	33.9	136.8	145.5	138.3	140.9
1429525_s_at	Myo1f	AK021181	0.0872149	0.000648979	0.000430108	0.807443	2.78548	3.44976	105	97.2	122.6	107.8	98.1	103.7	82.6	64.9	323.1	296.5	223	362.4
1446526_at	9330199F22Rik	BB085416	0.384792	0.0408572	0.00872252	0.656051	2.26115	3.4466	3.3	1.1	4.3	7	4.8	2.2	1.9	1.4	10.7	8.5	4.9	11.4
1420753_at	Tll1	NM_009390	0.829072	3.0435e-05	0.00022692	1.06719	3.67637	3.44491	22.2	30.5	20.1	16.5	17.1	41	14.7	22.5	69.1	85.8	84.3	89.1
1439040_at	Cenpe	BG068387	0.244846	0.00104098	0.00060577	0.835659	2.87597	3.44156	16.4	13.1	20.5	14.5	10.2	12.7	15.2	15.8	56.5	34.3	43.3	51.4
1421036_at	Npas2	BG070037	0.62539	0.0112188	0.000180677	0.770833	2.65278	3.44144	32	6.2	12.9	6.5	16.8	10.8	6.8	10	37.4	31.7	39.6	44.1
1427385_s_at	Actn1	BC003232	0.791121	0.000110872	0.000110455	1.04307	3.5895	3.44129	114.6	101.7	145.5	84	127.8	136.9	84.2	116.1	335.3	422.1	371.6	471.2
1454169_a_at	Epsti1	AK017174	0.0546467	0.00140938	0.000775429	0.783389	2.69529	3.44054	40.4	50.5	39.7	47.6	43.6	33.8	29.4	32.8	130.2	149.1	86.3	114.7
1448728_a_at	Nfkbiz	AB026551	0.240608	0.000382881	0.000177019	0.862446	2.96618	3.43927	117.7	82.6	114	79	86.8	79.8	89.4	83.2	304.9	272.3	353.9	235.5
1443864_at	Dtl	BG070404	0.122614	0.000855449	0.00752165	2.92308	10.0513	3.4386	2	1.7	1.2	2.9	2.4	6.5	11.2	2.7	19.4	11.6	23.6	23.8
1453939_x_at	Gm9706	AK019325	0.708152	0.0112892	0.00632924	0.816594	2.80786	3.4385	10.5	3.1	2	7.3	1.1	9	2.3	6.3	13.3	17.4	12.2	21.4
1436497_at	---	BI793666	0.0100653	0.000384334	5.06522e-05	0.592799	2.03803	3.43798	42.8	57.7	54.7	42	37.1	28	31.9	19.9	83.6	111.5	103.7	103.1
1419272_at	Myd88	BC005591	0.762363	6.35237e-07	6.38689e-08	1.03237	3.54851	3.43725	264.2	281.1	328.5	204.4	280.3	303.8	254.4	274.6	929.2	980	920.3	996.5
1456028_x_at	Marcks	BB454540	0.137519	0.00533541	0.00247009	0.777843	2.67336	3.43689	510.9	493.2	666.7	376.4	419.3	397.5	456.8	318.8	1168.8	1436.3	992.4	1875.4
1448194_a_at	H19	NM_023123	0.700119	2.93121e-06	1.64265e-06	1.04656	3.59681	3.43679	2144.5	1902.6	1750.8	2675	2606.4	2182.9	2095.3	1982.8	7040.6	7907.2	7346.4	8181.2
1436902_x_at	Gm9844 /// Tmsb10	BB096368	0.922477	7.4661e-08	1.42211e-09	0.992152	3.40825	3.43521	2439.9	2063.6	2923.5	2396.9	2578.7	2509.6	2392.8	2265.7	8354.1	8564.8	8338.4	8225
1438566_at	St8sia6	AV375081	0.135553	0.00047045	0.000220999	0.763068	2.61989	3.43336	47.3	52.3	32.1	44.3	28	24.6	41	40.7	93.8	117.5	139.4	110.4
1442746_at	Gm2043	AW490031	0.141047	0.0101263	0.00293623	0.677647	2.32471	3.43056	6.7	14.7	10.1	11	10.4	5.2	7.5	5.7	22.7	17.7	34.1	24.3
1439345_at	Gpnmb	BB113177	0.394046	7.91104e-06	2.53741e-05	1.1848	4.06366	3.42981	8.6	11.9	15.2	13	12.4	9.9	19	16.4	53.6	46.3	53.1	44.9
1434291_a_at	Serf1	AA709993	0.334444	5.87602e-05	3.72433e-05	0.898438	3.08026	3.42846	32.6	37.9	41.3	29	31.7	27.4	30.3	37.1	93.5	100.4	118.1	121.7
1446259_at	---	BB124660	0.759266	0.00522454	0.00324556	0.865089	2.96213	3.42408	19.5	5.5	22.2	37.3	4.2	30	26.5	12.4	50.4	75.1	49.9	74.9
1428942_at	Mt2	AA796766	0.646768	7.83208e-06	5.21849e-06	1.07047	3.66098	3.41998	2653	1638	2856	2147.8	2280.3	2450.3	2153	3066.2	9400.5	8050.8	8676.7	7900.1
1420501_at	Dnajc1	NM_007869	0.769524	1.25291e-07	2.76797e-07	1.02049	3.48869	3.41863	69.9	74.4	74.4	64.3	76.6	79.7	71.4	61.1	231.3	258.6	250.2	247.2
1416664_at	Cdc20	NM_023223	0.953824	0.00042676	0.000335167	0.99177	3.39026	3.4184	115.8	126.6	71.3	123.7	122.4	93.2	98	120.2	319.4	339.2	350	474.3
1427294_a_at	Slc38a10	BB406585	0.803547	6.02259e-07	3.30014e-07	0.977739	3.34078	3.41684	1143.8	977.1	1346.7	1087.5	1141.4	1262.7	1065.2	984.4	3668.2	3896.5	4024.9	3628
1458307_at	B230334C09Rik	BE992834	0.010756	0.152302	0.00601162	0.417391	1.42609	3.41667	6.1	4.9	7.7	4.3	2.9	3.6	1.2	1.9	10.5	7.4	4.9	10
1425137_a_at	H2-Q10	BC011215	0.599736	0.000876682	0.000271542	0.862885	2.94685	3.41511	59.8	55.5	82.8	25.8	59.4	62.7	37	34.1	169.4	171	127.6	191.8
1436509_at	Mlec	BB000110	0.495277	1.85111e-05	1.89628e-05	0.940091	3.21048	3.41507	340.3	276.3	299.8	335.5	340.9	282.2	310.9	242.9	989.9	975.5	896.9	1156.9
1423467_at	Ms4a4b	BB199001	0.0290576	0.0174046	0.00243844	0.568699	1.94195	3.41473	29.6	45.5	35.1	25.9	15.4	14.3	20.9	26.8	82.7	77.6	43.6	60.4
1438716_at	AI451617	BG068242	0.128689	2.60874e-05	8.90234e-06	0.841539	2.87267	3.41358	44.9	36.2	53.4	42.2	40	33.2	40.2	35.3	141.7	125.1	111.4	129.4
1422992_s_at	Pik3cd	NM_008840	0.327663	0.000441369	0.000116379	0.78169	2.66801	3.41313	31.3	29.9	13.3	24.9	27.2	14.4	14.8	21.3	61.3	71.3	56.9	75.7
1449164_at	Cd68	BC021637	0.0655018	1.4607e-05	8.9859e-06	0.873255	2.9799	3.41241	787.6	695.4	871.5	789.6	639	696.4	754.9	655.3	2119.4	2262	2317	2670.7
1419062_at	Epb4.1l3	NM_013813	0.226813	1.99785e-06	6.65622e-07	0.9028	3.07812	3.40953	282.9	231.9	301.8	236.9	258.7	242.3	226.9	223.2	874.4	819.7	752.3	796.4
1444992_at	AI120166	BM239362	0.0396987	2.45163e-05	1.45216e-05	0.846567	2.88627	3.40938	78.6	65.2	70.5	65.3	61.7	63.6	59.7	51.7	228.9	194.7	206.5	176.9
1449305_at	F10	NM_007972	0.559992	0.0010031	0.000505322	1.1978	4.07692	3.40367	14.8	11.7	3.9	24.2	19.5	16.6	13.5	15.8	55.5	61.9	39.8	65.4
1417266_at	Ccl6	BC002073	0.192688	3.35179e-05	1.73867e-05	0.859782	2.92606	3.40326	484.6	443.5	616.8	582.5	527.4	449.3	472.4	380	1744	1603.2	1536.8	1340.9
1459749_s_at	Fat4	BB536078	0.0367299	0.00170605	0.000947861	0.786264	2.67525	3.40248	88.9	80.4	93.8	74.7	58.6	73.9	76.8	56.3	173.8	247.8	193.9	288.2
1437117_at	Acap1	BB757196	0.0304477	0.00345524	0.000434028	0.552855	1.88079	3.40195	67	73.2	75.1	43.9	50.9	29.7	18.2	44.5	122.6	149	102.7	113.2
1450829_at	Tnfaip3	NM_009397	0.218043	0.00987662	0.00362942	0.76129	2.58925	3.40113	32.6	19.8	14.6	26	18.6	19.9	14.9	17.4	45.3	49.2	85.9	60.4
1435162_at	Prkg2	BB823350	0.87359	1.00083e-06	1.60764e-06	1.02925	3.50038	3.4009	41	33.4	33.4	22.1	28	27.5	45.5	32.7	115.6	110.5	113.9	114.7
1426348_at	Col4a1	BF158638	0.724859	9.27186e-05	7.43925e-05	0.955946	3.25027	3.40006	686.7	576.4	731.9	481.5	482.2	708.2	557.2	619.8	1698.8	2362.1	1906	2082.4
1449453_at	Bst1	AI647987	0.0135185	3.07834e-05	6.7841e-06	0.732955	2.491	3.39858	51.6	53.5	61.7	44.4	42.8	33.3	40.1	38.6	113.9	134.8	135.5	141.9
1441150_x_at	Gm13295 /// Gm2169 /// Gm2277 /// Gm2562 /// Gm256	BB829165	0.463445	0.00829611	0.00028656	0.741631	2.52031	3.39833	18.8	139.6	69.6	79.7	63.5	60.1	40.7	63.9	185	201.6	152.8	236.1
1418248_at	Gla	NM_013463	0.372801	1.10832e-05	4.35032e-06	0.921755	3.13207	3.39794	54.6	43.6	59.1	63.8	54	50.3	51.4	48.1	153.1	173.2	175.5	190.7
1417506_at	Gmnn	NM_020567	0.792729	1.17067e-05	4.79435e-06	0.971025	3.29823	3.39665	86.3	56.9	62.1	77.7	68.8	60.4	74.9	70.7	203	242.8	239.5	248.1
1437058_at	Megf6	AI450376	0.610562	1.70741e-05	1.18156e-05	1.05447	3.58128	3.39629	59	64.9	67.7	43.4	63.6	56.5	67.9	59.8	203	232.3	183	223.3
1418445_at	Slc16a2	AW105741	0.183861	1.19764e-05	1.01975e-05	0.927791	3.15049	3.39569	188	175.1	200.7	177.1	173.6	157.1	189.1	167.6	540.2	593	537	664
1454023_a_at	Chpf	AK006466	0.989681	6.21737e-05	6.29592e-05	1.00092	3.39808	3.39494	138.7	117.4	147.9	136.6	141.5	128.6	150.6	120.4	377.5	481.8	447.1	530.6
1448754_at	Rbp1	NM_011254	0.289052	1.86517e-05	1.82152e-05	1.08231	3.67076	3.3916	146.8	189.9	198.6	173	195.3	204.6	185	181.7	551.6	672.8	646.1	729.5
1455269_a_at	Coro1a	BB740218	0.0363746	0.000160464	7.37421e-05	0.814151	2.75854	3.38825	415.7	366.6	435.4	327.1	343.1	290.5	314.5	309.6	1260.3	1084.5	884.3	1032.3
1427894_at	Vasn	AK012169	0.137462	0.000102323	2.94534e-05	0.829656	2.81088	3.38801	638.8	505.2	773.9	543	538.2	492	524.2	487.3	1417.4	1904.6	1826.2	1769.1
1428585_at	Actn1	BE853286	0.699579	1.83059e-05	1.7004e-05	1.03177	3.49502	3.38741	1107.2	848.5	1020.1	870.7	1066.8	1060.8	952.9	888.2	2898.2	3379.5	3811.1	3354.8
1425363_at	B4galnt1	BC022180	0.0399187	0.370083	0.00767181	0.381551	1.2914	3.38462	12.6	4.5	16	14.6	1.8	5	4	7.4	9.2	17.5	14	20.9
1439877_at	---	BB125494	0.0570236	0.000349431	0.000242019	0.855864	2.89648	3.38428	124.1	110.5	118.8	104.5	110.6	98.5	83.7	99.1	262.2	325.1	332.1	406.9
1429390_at	Acpl2	BB183525	0.427236	4.89934e-06	5.63773e-06	0.936665	3.16932	3.38362	166.6	168	152.9	140.9	172.5	125.1	142.7	148.3	445.3	481.3	529.5	535.5
1435665_at	AI451617	BM241342	0.102458	0.000248628	0.000143687	0.83305	2.81774	3.38244	103.2	79.3	91.6	78.7	77.6	82.9	73.7	59.7	290.4	246.3	195.3	262.1
1429007_at	Slc35b2	AK003377	0.152939	0.000121913	0.00016789	1.23319	4.17028	3.38171	27.9	17.5	27	19.8	23.9	27	29.3	33.5	91	79.7	96.3	117.5
1420395_a_at	Kif9 /// LOC100047193	NM_010628	0.551697	0.0117047	0.00497506	0.754098	2.54827	3.37923	2.9	13.2	17.5	21.3	14.8	18	5.6	3	34.1	47.5	31.3	27
1417205_at	Kdelr2	AJ278133	0.113672	8.78098e-06	7.65888e-06	0.945143	3.19215	3.37742	699.2	686.5	648.5	645.5	616.8	671.1	639.8	605	1837.3	2151.7	2273.6	2291.4
1455001_x_at	LOC633178 /// LOC638236 /// Rpl13a	BF659630	0.255919	9.62214e-08	6.87177e-07	0.863505	2.91507	3.37586	954.5	1153.6	1137.9	921.2	905.5	1012.3	627.9	1052.7	2976	3034.4	3021.5	3115.8
1431055_a_at	Snx10	AK010399	0.213477	5.19526e-05	5.59164e-05	1.08181	3.65097	3.37487	302	237.5	287.8	255.7	289.4	295.8	278.7	307.7	831.2	915.1	1113	1094.7
1456694_x_at	Ptpn6	AA921444	0.0430801	0.000572541	0.000131841	0.725759	2.44931	3.37482	304.7	250.4	402.1	310.3	253.8	239.1	233.4	193.6	743.5	618.1	842.5	900.4
1427930_at	Pdxk	BG063905	0.31454	0.000519313	0.00426216	1.9	6.40714	3.37218	1.5	4.9	6.6	1	8.1	13.2	2.8	2.5	29.8	19.6	20	20.3
1454761_at	BC005764	BI408618	0.520149	0.000605348	0.00914648	1.59168	5.36106	3.36817	8.4	8.2	25.7	10.6	11.3	53	11	8.9	48.4	75.3	76.1	83.8
1418465_at	Ncf4	NM_008677	0.0477936	9.78475e-06	2.98469e-06	0.819056	2.75639	3.36532	221.5	200.3	230	170	184.8	156.1	173.9	158.3	618.9	587.3	515.7	543.3
1421009_at	Rsad2	BB741897	0.659113	0.00471122	0.00451146	0.96814	3.25631	3.36347	90.7	78.7	90	89	81.7	87.4	71.5	96.7	302	259.1	179	394.4
1427007_at	Sash3	AK004734	0.0011188	0.000554436	0.000145508	0.661352	2.22323	3.36164	148.1	123.4	145.4	135	87.5	103.1	97.3	77.1	340.4	316.8	234.2	335.6
1440687_at	---	AV293622	0.00130278	0.00176596	6.28998e-05	0.526761	1.76995	3.36007	23.1	26.1	32.5	24.8	14.2	14.7	15.6	11.6	44.7	39.3	54.1	50.4
1444572_at	Mmd2	AW120630	0.0286175	0.78274	0.00925062	0.323718	1.08654	3.35644	11.3	20.3	7.9	22.9	5.8	2.4	5.7	6.3	8.6	22.1	20.6	16.5
1457239_at	Sykb	AI451104	0.00147371	0.0222706	9.20853e-05	0.429426	1.44019	3.35376	61	77	65.6	47.2	32.5	26.6	25.1	23.5	99.2	95.1	96.2	70.7
1433057_at	4933411O13Rik	AK016780	0.17004	0.14556	0.00783394	0.455919	1.52897	3.35359	10.6	14.4	12.5	2.2	1.9	3.3	11	1.9	13	19.4	12.3	16
1440617_at	Cpa6	BB072673	0.198079	0.00991065	0.00503914	0.767263	2.57289	3.35333	9	13.2	7.7	9.2	10.1	5.9	5.8	8.2	21.8	15.7	33.3	29.8
1458057_at	---	BB343142	0.105141	0.0050215	0.00360723	0.865534	2.90177	3.35258	108	93.1	109.7	89.3	91.2	94.8	87.4	72.9	253.5	240.1	421.4	246
1436349_at	2700094K13Rik	BI408855	0.412753	1.75974e-05	1.85172e-05	1.04897	3.51666	3.35249	249.7	304.8	273.8	258.1	302.8	269.6	269.2	298	795.5	978.8	1021.5	1024.7
1440796_at	A330021E22Rik	BB561281	0.183318	0.0838332	0.000353476	0.493927	1.65587	3.35246	7.3	0.6	7.8	9	4	2.2	4.9	1.1	10.9	11.2	9.7	9.1
1435175_at	BC034090	BI738434	0.48114	7.47927e-05	2.41186e-05	0.868935	2.91188	3.35109	53.8	40.2	56.2	29.1	43.8	32.4	49.5	30.1	119.5	147.3	121.9	133.4
1422460_at	Mad2l1	NM_019499	0.323329	3.71711e-05	7.38752e-05	1.12459	3.76851	3.35101	97.2	92.8	95.8	109.9	129.3	82.7	106.3	126.7	322.9	337.4	406.6	424.3
1419100_at	Serpina3n	NM_009252	0.692947	0.000184884	0.00012922	0.96394	3.22935	3.35016	351.7	341.4	475.7	348.1	368.9	372.5	376	344.8	1494.5	1204.5	1020.4	1179.2
1451340_at	Arid5a	BC027152	0.0872964	0.00251186	0.00103112	0.77491	2.59493	3.34869	116.4	77.8	124.4	95.9	82.2	86.1	85.9	67	237.4	308.9	196.5	332.8
1428896_at	Pdgfrl	AK004179	0.00151243	5.80105e-05	9.11678e-05	1.23045	4.1199	3.34828	220.5	244	244.4	242.7	304.7	288.9	305.9	271.4	783.3	1103.7	949.5	1084
1423379_at	Nfatc4	BF227641	0.449687	9.23388e-05	3.67189e-05	0.909414	3.04041	3.34326	70.7	45.2	61.7	47.6	56.1	51.5	47.1	50.1	141.3	191.3	182.6	169.5
1426057_a_at	Epha3	M68515	0.770894	0.0078318	0.00674589	0.916318	3.06276	3.34247	6.2	8.5	6.2	3	7.8	5.5	6.4	2.2	10.8	21.3	16.8	24.3
1426025_s_at	Laptm5	U29539	0.207999	5.65309e-06	5.92553e-07	0.860603	2.87586	3.34168	683.2	502.7	787.5	615.6	602.2	499	582.6	544.3	1930.5	1872.4	1702.5	1940.2
1438690_at	Tyms	BM068975	0.300872	0.00298977	0.000763394	0.768061	2.56654	3.34158	29.3	16.8	12.4	20.4	10.3	19.2	14.7	16.4	39.2	57.6	44.1	61.6
1441355_at	E030047P09Rik	BB536126	0.0150899	0.000716346	0.000239603	0.745788	2.49158	3.34086	33.7	35.3	39.7	27.8	24.9	24.9	24.3	27.7	75.8	95.1	68.6	100.6
1435193_at	A230050P20Rik	BB085904	0.267705	0.000159502	6.02042e-05	0.817982	2.73197	3.33989	80.2	135.9	104.2	90.1	111.1	80.5	73.3	70.8	233.3	277.9	294.5	315.5
1423465_at	Frrs1 /// LOC100046401	BB032852	0.589759	8.73825e-06	6.19876e-06	1.05152	3.51058	3.33858	134.2	132.7	164.9	111.7	154.3	135.3	131.5	150.4	415.6	479	518.5	494.9
1443171_at	---	BB444561	0.932059	0.00629532	0.00149221	0.962343	3.20921	3.33478	4	12.9	4.1	2.9	8.7	5.3	4.4	4.6	14.2	21.1	17.1	24.3
1423877_at	Chaf1b	BC013532	0.808589	1.43572e-05	6.08735e-06	1.03687	3.45625	3.33333	43.2	52.4	29.3	35.1	34	42.4	41.1	48.4	121.9	139.1	142.6	149.4
1422562_at	Rrad	NM_019662	0.957588	2.58545e-05	6.94944e-06	1.00848	3.36087	3.33261	80.8	65.4	110.5	61.7	94.2	75	71.4	80.5	238.9	284.7	256.8	289.7
1444987_at	Ctsb	BG067383	0.401573	0.0014436	0.000964062	0.91065	3.0343	3.33202	91.5	107	97.1	65.9	82.1	86.8	78	82.3	246.8	307.6	199.3	343.2
1420361_at	Slc11a1	NM_013612	0.015441	4.06785e-05	1.3786e-05	0.753012	2.50834	3.33108	213.6	215.2	248	186.4	170.5	179.9	164.7	134.9	554.1	584.7	459.8	566.6
1456006_at	Bcl2l11	BB667581	0.303973	1.57813e-05	1.15368e-06	0.859249	2.86104	3.32969	63.2	70.7	45	44.9	53	45.9	42	51.4	154.6	173.6	150.1	162
1430612_at	1810033B17Rik	BB533148	0.214111	0.000662129	0.00115113	1.44482	4.8107	3.32961	29.3	36.2	42.5	9.8	59.8	40.8	39.5	30.1	161.9	175.7	113.7	115.4
1419155_a_at	Sox4	AI428101	0.433338	3.0414e-05	3.24179e-05	1.0376	3.45278	3.32766	192.3	168.9	181	165.2	172	178.8	189.1	194.1	507.7	631.7	611.6	691.5
1417299_at	Nek2	NM_010892	0.401742	0.00190102	0.000879453	0.843627	2.80552	3.32555	25.4	19	11.6	20.1	15.9	19.8	11.7	16.8	39.1	66.8	57.7	49.9
1426570_a_at	Frk	BB787292	0.0559082	0.000552277	0.00016706	0.764969	2.54281	3.32407	46.1	55.9	39.1	37.6	32.6	31.7	38.5	33.9	98.6	104.6	110.1	141.1
1445104_at	E230029C05Rik	BB366803	0.00149229	0.000713344	0.000136069	0.654288	2.17488	3.32405	35.9	33.8	43.4	35	25.7	25.6	22.6	23	95.4	81.6	63.7	81.4
1423915_at	Olfml2b	BC025654	0.822187	4.00976e-05	3.5425e-05	1.01717	3.3783	3.32126	800.4	1050.7	1073.2	959.7	1056.6	998.2	1004.9	891	2894.3	3675.8	2950.6	3600.6
1445027_at	Cdr2l	BG073163	0.320847	0.000111021	2.70165e-07	0.799711	2.65582	3.32098	90.4	83.4	158.8	82.3	74.8	94.5	89.5	73	274.6	287.1	260.7	279.5
1418842_at	Hcls1	NM_008225	0.109028	3.1268e-05	1.51475e-05	0.804573	2.67083	3.31956	102.4	73.1	97.1	103.5	87.2	83.6	74.6	57.2	273.7	257.2	257.1	216.5
1429172_a_at	Ncapg	BB702347	0.910596	1.6179e-05	3.39468e-05	1.02534	3.40238	3.31831	15.3	18.5	11.3	22	21.9	9.8	15.8	21.3	53.2	63.7	55.8	55.6
1418175_at	Vdr	AV290079	0.650281	0.00048697	0.000352359	0.946217	3.13978	3.31824	103.9	83.2	87.8	63.5	90.4	81.6	67.7	80.5	323	243.3	288.2	208
1439012_a_at	Dck	BB030204	0.00419338	4.15534e-06	2.6762e-06	0.851242	2.82311	3.31646	177.2	163.2	167.8	160	142.7	141.3	132.4	152.4	469.2	466.5	429.2	521.5
1430252_at	3110027N22Rik	BB753814	0.00695237	0.00887038	0.00117957	0.588909	1.95298	3.31627	46.4	36	49.6	33.9	27	27.1	19.5	24.1	54.9	101.2	82	85.9
1449632_s_at	Fkbp10	AI325255	0.653665	4.63844e-05	2.62114e-05	0.956473	3.17041	3.31469	1094.8	724.1	1045.5	944.7	937.7	971.7	827.1	906.8	2578.4	2890.9	3201.9	3405.2
1424144_at	Cdt1	AF477481	0.773514	4.25161e-05	5.40162e-05	0.973323	3.22314	3.31148	98.6	90.9	102.8	108.8	115.9	90.8	79	104.7	261.9	333.6	345.4	351.9
1460378_a_at	Tes	BC010465	0.30281	4.9628e-06	4.38034e-06	0.923685	3.05779	3.31043	103.6	98.3	112.3	90.7	105.1	93.9	80.1	94.9	280.7	339.6	297.8	320
1422508_at	Atp6v1a	NM_007508	0.705908	8.61614e-06	7.4966e-06	1.03904	3.43802	3.30884	560.3	382.6	502.8	467.7	481.6	467.7	456.1	582.7	1481.1	1598.3	1657.4	1841.5
1447253_x_at	Nup54	BM195726	0.464848	0.0312507	0.00183158	0.686275	2.27059	3.30857	8.1	10.1	26.8	6	4.8	8.8	13.9	7.5	34.4	20.9	26.2	34.3
1416258_at	Tk1	NM_009387	0.482889	0.000401857	0.000391442	1.15615	3.82447	3.30793	112.7	103.5	58.2	148.9	117.8	91.7	132.7	147.2	328.9	360.8	429.7	499.5
1419764_at	Chi3l3	NM_009892	0.903849	0.00439106	0.00691862	0.96681	3.19803	3.30782	130.7	171.4	171.9	155.7	271.9	128.1	100.2	108.6	396.2	692.5	359.4	565.7
1451584_at	Havcr2	AF450241	0.0353708	2.09572e-05	4.38543e-07	0.715484	2.36557	3.30625	48.2	33.4	54	43.3	34.9	28.8	35.2	29.1	111.3	98.7	105.2	108
1436838_x_at	Cotl1	BB160417	0.150754	2.73838e-06	1.17662e-07	0.858517	2.83769	3.30535	778.3	541.5	811	697.8	627.5	615.6	589	596.3	1990.8	2120.4	1888.6	2026.9
1428767_at	Gsdmd	AK007710	0.192491	1.68503e-06	7.41392e-08	0.874162	2.88854	3.30436	125	167.4	139.2	180.3	139.5	137.5	124.3	133.6	435	459.8	418.8	453.9
1457128_at	---	BB141504	0.525073	0.000163956	0.000217735	0.907606	2.99887	3.30416	43.1	44.4	51.1	38.9	36.1	29.6	55.6	39.8	121.6	148.1	152.8	109.8
1424762_at	C1qtnf5 /// Mfrp	BC023068	0.599662	0.000328431	0.000390968	1.04001	3.43525	3.30309	268.5	292.7	304.7	306.3	279.2	327.3	346.9	265.7	778.1	1249.3	972.4	1027
1417601_at	Rgs1	NM_015811	0.0338822	0.00174339	0.000435066	0.715165	2.3615	3.30203	55.2	35.8	48.6	39.1	32.2	28.9	35.6	31.1	114.9	112.3	120.3	74.5
1441115_at	D18Ertd232e	BB205273	0.0233001	0.0398889	0.007237	0.555442	1.83342	3.30083	61.3	46	50.8	37.6	34.9	37.3	16.5	20	72.4	86.5	132.4	67.5
1430339_at	2610021K21Rik	AK011507	0.701556	0.000933735	0.00153562	0.83959	2.77133	3.30081	6.2	8.6	3	11.5	9.2	10.8	1.1	3.5	22.1	18.7	22.5	17.9
1441520_at	Aspm	BB478135	0.245461	0.000901224	0.000315444	0.670197	2.2118	3.30023	19.1	9.4	22.9	14.7	6.7	18.7	5.5	13.4	35.4	37.5	33	40.3
1442175_at	C030027H14Rik	BB358264	0.33212	5.81334e-05	8.86689e-05	1.08728	3.58762	3.29963	78.2	70.8	75.8	70.8	88.8	91.2	74.7	66.7	210.4	293.2	268.1	288.8
1421755_at	Gpr132	NM_019925	0.561602	0.000809089	0.00147785	0.790769	2.60923	3.29961	5.5	5.9	12.3	8.8	1.5	7.7	4.4	12.1	24.6	18.9	22.4	18.9
1459722_at	Zswim6	AI427602	0.119592	0.000346573	0.000137392	0.798157	2.63351	3.29949	174.4	124.7	165.3	121.7	104.9	115.1	104.9	142.9	442.1	410.5	388.9	302
1448617_at	Cd53	NM_007651	0.263705	1.99821e-05	1.30901e-05	0.891244	2.93848	3.29706	844.7	650.2	851.5	706.3	662.4	706	783.2	569.1	2386.8	2464.7	1976.7	2142.1
1425904_at	Satb2	AF319623	0.161169	0.346498	0.00305098	0.417647	1.37647	3.29577	7.2	12.9	13	0.9	5.3	3	0.5	5.4	15.1	10.2	12	9.5
1443249_at	---	BM247240	0.359854	6.59657e-06	1.76285e-05	1.21376	3.99896	3.29467	59.3	30.2	45.9	56.4	57.9	52.8	42.1	80	181.6	208.1	200.1	177.2
1441237_at	D5Ertd163e	BG063760	0.143604	0.00115609	0.00183787	1.88219	6.2	3.29403	5.6	6.5	21.4	3	16.3	13.7	14.6	24.1	66.9	49.8	40	69.6
1452087_at	Epsti1	BF020640	0.19827	0.000272745	0.000185164	0.900993	2.96523	3.29107	177	147	133.6	146.4	148.3	128.2	138.6	129.1	489.8	517.1	344.3	439.8
1441478_at	9930013L23Rik	BB142076	0.087937	0.0172571	4.38158e-05	0.523654	1.72268	3.28972	11	15.2	24.6	10.5	3.7	10.2	9.6	8.6	24.2	27.8	25.5	28.1
1421001_a_at	Car6	NM_009802	0.492449	0.000814347	0.00199299	1.31557	4.32787	3.28972	31.8	18.5	9.6	13.3	24.1	15.2	15.3	41.7	94	64.7	94	64.1
1422056_at	Ntn3	AF149094	0.387472	0.00594068	0.00504633	0.747126	2.45747	3.28923	9.1	15.2	8.5	10.7	5.9	9.6	14.4	2.6	16.4	28.5	30.6	31.4
1454877_at	Sertad4	BQ174721	0.412561	4.696e-07	1.20157e-07	0.936013	3.07828	3.28872	411.8	363.6	493.2	438	439.2	404.2	386.4	367.6	1262	1335.5	1382.2	1273.7
1427669_a_at	Cit	AF070066	0.424091	9.02375e-05	0.000282311	1.41684	4.65684	3.28678	5.1	20.6	5.8	16	9.7	24	24.6	9	49.6	61.8	57.5	52.3
1450696_at	Psmb9	NM_013585	0.00104559	1.36306e-05	7.98878e-06	0.782958	2.57281	3.28601	150.3	156.4	152.1	150.3	124	130.1	118	104.8	419	412.4	337.6	398.1
1424133_at	Tmem98	BC011208	0.952887	0.000296414	0.000297398	1.00537	3.30222	3.28457	162.6	153	196.9	194.6	171.8	199.9	150.8	188.4	436.5	609.3	597.9	691.3
1435584_at	A630033H20Rik	BB034567	0.0498454	0.000359813	7.98096e-05	0.644518	2.11683	3.28436	33.2	50.6	53.9	42.9	17.3	38.7	33.9	26.5	92.5	94.4	85.2	110.2
1427603_at	Atf7ip2	BC018510	0.00489748	0.000124079	0.000687437	3.18919	10.473	3.2839	2.9	2.4	0.9	1.2	8.2	4.9	4.7	5.8	16.1	24.4	16.5	20.5
1426554_a_at	Pgam1	BI407347	0.546687	8.64869e-07	4.84449e-07	0.956502	3.136	3.27861	632.9	518	670.6	576.3	583.2	544.9	529.9	635.5	1788.3	1815.5	1892.4	2023.3
1416935_at	Trpv2	NM_011706	0.191622	3.68673e-06	3.50591e-07	0.854729	2.80202	3.27825	109.5	73.2	110.4	103.4	78.6	79.2	83.9	97.2	264.9	296.6	271.7	277.8
1457961_at	---	BB713538	0.0172905	0.0436372	0.000432144	0.426768	1.39899	3.27811	6.5	9.3	12.7	11.1	7.1	4.2	4	1.6	15.3	11.9	13.2	15
1424229_at	Dyrk3	BC006704	0.278674	0.177118	0.00949878	0.52231	1.71129	3.27638	3.9	3.4	12.9	17.9	3.7	2.4	9	4.8	20.6	11.5	21.2	11.9
1424587_at	Gemin8	BC023488	0.0107375	0.00171729	6.89689e-05	0.547093	1.79197	3.27545	31.8	34.2	21.4	34.7	20.7	13.9	20.1	12.1	56.7	62.7	47.5	51.9
1423524_at	Mastl	BF021309	0.741486	0.000879604	1.73631e-05	1.13968	3.73016	3.27298	0.7	11.7	4.7	14.4	8.4	8.8	8.3	10.4	24.9	29.4	31.4	31.8
1434830_at	Mxd1	AV228517	0.293767	1.36749e-08	3.33029e-09	1.08196	3.53966	3.27151	133.2	129	165.3	138.6	157.8	145.2	141.9	167.6	498.7	493.3	506.5	505.3
1416892_s_at	Fam107b	BC021353	0.147493	1.36196e-05	1.18977e-05	0.898174	2.93732	3.27033	307.1	310.6	294.5	265.3	292.5	228.7	251.8	284.6	776.9	933.7	804.4	943.7
1424766_at	Ercc6l	BC004701	0.0914559	0.000148351	3.35918e-05	0.794521	2.59817	3.27011	38.3	44.9	60.3	53.6	37.4	36.9	43.3	39	107.6	135	144.8	124.7
1417323_at	Psrc1	NM_019976	0.642348	0.00056279	0.000911374	1.13339	3.70568	3.26955	18.7	42.6	25.1	29.8	30.9	30.7	20.4	49.7	80.4	101.7	119.5	129
1422975_at	Mme	NM_008604	0.0330803	0.0108814	0.00263582	0.666034	2.1771	3.26876	45.1	46.8	39.1	27.1	23	31	24.4	26.9	53.3	89.6	90.3	111
1418536_at	H2-Q7	M29881	0.0595827	0.000796801	0.000389306	0.756046	2.47114	3.2685	162.6	139.3	147.1	117.5	116.2	135.5	90.7	85.9	431.5	317.9	367.1	283.4
1425714_a_at	Nfam1	AF361364	0.000170977	0.000300896	6.47127e-05	0.638177	2.08547	3.26786	42.5	46.5	45	41.5	26.3	31.6	29.4	24.7	94.4	96.7	73.2	101.7
1419161_a_at	Nox4	AB041034	0.00661817	0.00011526	2.66921e-05	0.720238	2.35307	3.26707	84	65	84	86.2	55.8	63.4	58.5	52.2	181.9	195.1	160.6	213.5
1426724_at	Cnn3 /// LOC100047856	AI314104	0.865228	2.81398e-06	2.32053e-06	0.988986	3.2309	3.26688	821.6	770	916.5	733.2	879.5	808.3	788.3	729.5	2368.9	2759.5	2546.2	2797.7
1440299_at	E330016A19Rik	BB073366	0.134692	1.20068e-06	5.23611e-08	0.857143	2.7998	3.26644	55.2	45.7	42.4	59	39.7	45.2	46.3	42.2	142.8	134.1	143.6	145.9
1427650_a_at	Runx1	D13802	0.0256619	9.22313e-06	4.09728e-06	0.74292	2.42611	3.26563	64.1	57	47.8	57.1	35.3	46.3	36.4	49.9	135.8	135	150.3	127.2
1427884_at	Col3a1	AW550625	0.00200108	3.5944e-09	1.64644e-08	1.23977	4.04776	3.26493	2204.7	2120.3	2132.2	2295.4	2660.2	2870.5	2846.2	2474.3	8717.7	9180.5	8622.4	8907.8
1438037_at	Herc5	AW208668	0.0117894	0.000257469	7.11128e-05	0.700949	2.28757	3.26353	52	58.3	44.9	45.1	38.3	40.9	29.2	32	116.7	104	101.8	135.7
1425223_at	Birc3	BC011338	0.282999	0.000337993	8.84681e-05	0.81908	2.67211	3.26233	74.2	45.4	69	44.1	57.6	52	39.9	41.1	133.3	185.1	151.6	151.8
1424143_a_at	Cdt1	AF477481	0.941909	2.37269e-07	3.90415e-07	0.993813	3.24205	3.26223	215.9	169.2	205.5	201.4	217.1	174.2	175.8	220	605	636.3	670.5	655.9
1439808_at	Ipcef1	BQ176089	0.749589	0.000128798	0.000629382	1.09524	3.57143	3.26087	16	26.9	19.3	21.8	35.1	28.3	18.8	9.8	80.5	81.8	57.7	80
1434130_at	Lhfpl2	BG917242	0.297221	0.000631948	0.000347175	0.880881	2.87016	3.25828	91.8	69.6	103	71.4	81	69.2	78.2	67.4	223.9	278.1	184.3	277.5
1429660_s_at	Smc2	BI684556	0.592296	6.92788e-05	7.12038e-05	0.954071	3.10752	3.25711	26.1	24.7	24	21	20.8	19.9	27.1	23.6	62.9	78	70.2	86.6
1419000_at	Cpxm2	AF017639	0.841523	0.000472043	0.000320942	1.03214	3.36167	3.25698	71.3	100.4	106.1	55.1	81.3	84.9	98.2	79.2	321.7	316.7	209.8	270.9
1415972_at	Marcks	AW546141	0.272969	0.000180714	0.000158689	0.932494	3.03661	3.25644	434.2	438.5	481.5	416	415.4	426	453.3	356	1236.6	1459.5	1096	1583.3
1417400_at	Rai14	NM_030690	0.439548	3.0813e-05	1.02691e-05	0.907285	2.95395	3.25581	535.5	389.9	530	362	471.3	422.8	371.5	383.3	1185.4	1293.4	1482.6	1407.1
1423093_at	Incenp	BI410774	0.229764	0.00569601	0.00056051	0.637887	2.07603	3.25455	21	7.3	26.1	23.2	5.6	16.4	8.4	19.1	37.7	37.1	37.9	48.4
1450033_a_at	Stat1	AW214029	0.293305	0.000177792	0.000153008	0.940628	3.05986	3.253	168.5	151.1	145.1	146.7	157.1	149.6	132.7	135.7	465.6	451.9	384.6	568.7
1424528_at	Cgref1	BC023116	0.107875	0.000274088	0.00020809	0.900907	2.92726	3.24924	120.7	109.7	114.1	129.8	105.9	119.2	98.3	103.9	269.1	334.7	379	405.6
1452415_at	Actn1	BC003232	0.642681	7.40792e-05	6.82154e-05	0.977192	3.17435	3.24844	161.2	138.4	152	140.3	134.9	153	139.5	151	438.6	510.8	537.2	392.3
1452519_a_at	Zfp36	X14678	0.0464666	0.000916821	4.70493e-05	0.671244	2.18	3.2477	653.2	428.7	490	358.1	313.2	316.2	319.5	346.6	1183	1115.6	1049.7	859.1
1423092_at	Incenp	BI410774	0.403777	4.88364e-05	6.53529e-05	0.9079	2.94846	3.24756	59.1	52.9	62.1	62.6	47.7	50.2	46.5	70.5	166.2	153.8	172.7	205.2
1422985_at	Fzd1	NM_021457	0.933017	0.000326233	0.000241273	1.01231	3.28692	3.24696	99.6	76.6	79.7	52.9	80.6	91.5	71.3	69.2	221.8	288.4	209.9	294.9
1435415_x_at	Marcksl1	BB491008	0.0398878	0.000336955	5.32583e-05	0.697154	2.26272	3.24565	54.1	54.1	66	40.1	29.7	44	34.5	41.2	114.6	131.5	103	135.8
1455048_at	Igsf3	BB484576	0.172375	0.000188881	0.000263458	1.14023	3.69965	3.24465	167.2	135.8	161.6	133.7	178.2	179.4	139.6	185	410.4	633.6	581.5	588
1425434_a_at	Msr1	L04274	0.0026583	0.000104097	3.57008e-05	0.637847	2.06852	3.24297	77.9	75.3	82.7	70.6	35.5	52.7	59.4	47.9	140.3	180.8	150.3	162.6
1459165_at	D4Ertd179e	BG066210	0.479069	5.47399e-05	3.38828e-05	0.892655	2.89454	3.24262	15.6	9.7	15.4	12.4	12.8	10.6	9.1	14.9	36.5	44.2	38.3	34.7
1428973_s_at	Tctex1d2	AK007178	0.10961	0.000493504	0.000317342	0.883225	2.86346	3.24205	83.7	108.7	90.2	101.9	85.6	81	90.2	82.8	209.1	297.1	329.8	265
1425396_a_at	Lck	BC011474	0.00947275	0.00115086	5.34922e-07	0.543869	1.76294	3.24148	48.7	58.2	45.1	31.5	26.3	23.6	26	23.9	88.1	78.3	78.3	78.8
1435605_at	Actr3b	BB125424	0.148601	0.000279088	0.000194096	0.902814	2.92612	3.24111	53.2	64	50.8	59.4	49.2	53.7	48.4	54	186.6	145.9	194.6	138.3
1455224_at	Angptl1	AI593746	0.624466	0.00107484	0.00111561	1.03948	3.36832	3.24039	259.1	350.7	318	348.8	348.5	339.6	342.2	296.7	805.1	1368.9	933.6	1192.4
1418969_at	Skp2	AV259620	0.97478	0.000360621	0.000414861	1.00341	3.25085	3.23982	50.2	38.9	42.3	44.8	37.3	49.5	52.2	37.8	103.8	161.7	147	160.3
1422920_at	Cldn13	NM_020504	0.203051	2.48119e-05	0.000417876	1.82937	5.9246	3.23861	2.1	6.3	11.2	5.6	10	7.6	7.7	20.8	32.3	41.6	37.6	37.8
1424067_at	Icam1	BC008626	0.807362	4.89186e-05	1.3809e-05	0.961814	3.11472	3.23838	179.6	131.9	204.6	112.4	154.7	165.1	163.5	121.2	443.4	544.2	453.9	516.1
1431877_a_at	Grhl2	AK002633	0.490068	0.0928122	0.00359456	0.636364	2.06061	3.2381	1.8	30.7	22	4.9	5.9	4.5	14.9	12.5	26.6	34.8	22.1	38.9
1429270_a_at	Syce2	AK005954	0.753789	3.75127e-05	2.4164e-05	0.966073	3.12783	3.23767	82.1	77	78.5	54.2	77.4	59.6	76	68.9	197.6	248	216	251.1
1452073_at	Fam64a	AK011345	0.269044	0.00010543	6.29402e-05	0.887188	2.87188	3.23706	35	24.3	31.9	32.9	22.9	27.2	29.8	30.2	76.6	91.7	83.5	104.6
1418441_at	Col8a1	NM_007739	0.00975424	1.96545e-06	6.35562e-06	1.52334	4.92949	3.23598	28.3	23.7	28.8	19.9	43.4	32.8	43.1	34.1	113.9	117.8	128.2	136.5
1442608_at	Layn	AV071586	0.168624	3.21244e-05	2.60524e-06	0.767866	2.48403	3.23498	46.2	45.5	66.7	38.9	48.6	40.3	31.2	31.4	129.3	124.4	119.1	117.3
1430422_at	1700020A23Rik	AK006141	0.296413	0.402063	0.00485826	0.435146	1.40586	3.23077	10.6	27.4	4.8	5	0.8	5.7	2.1	12.2	17.8	14.5	17.1	17.8
1425807_at	BC021891	BC021891	0.0209293	0.189741	0.00681708	0.402936	1.30179	3.23077	18.5	17.2	15.5	10.1	13	4.5	3.1	4.1	21.5	13.5	19.2	25.6
1416757_at	Zwilch	BC027435	0.383653	0.000186842	0.000119011	0.887967	2.8686	3.23053	44.8	31.5	30.6	37.7	38.1	25.5	29.8	35	93.3	91	106.2	124.3
1419609_at	Ccr1	AV231648	0.928639	1.1529e-05	6.87857e-06	1.00707	3.25331	3.23047	316.3	223.8	287	304.3	297.9	277.1	291.6	272.8	911	876.4	848.3	1045.1
1454268_a_at	Cyba	AK018713	0.21824	2.19334e-06	1.32375e-06	0.912927	2.94785	3.22902	1135.6	964.1	1216.9	1184.2	1128.9	990	1062.7	927.3	3078.7	3545.2	3180.1	3463.7
1451538_at	Sox9	BC024958	0.0111835	0.00837528	0.00110804	0.589444	1.90329	3.22895	93.5	64.7	89.8	68.4	46.7	46.1	34.1	59.6	114.2	141.4	150.6	196
1438227_at	She	BB143687	0.20191	0.002472	3.65696e-05	0.665122	2.14716	3.22822	34.7	17.9	19.8	13.9	20.3	10.6	11.6	14.9	41.8	44.7	51	47.8
1422571_at	Thbs2	NM_011581	0.986599	1.89638e-06	9.4367e-07	0.998632	3.22265	3.22707	1433.3	1123.3	1427.2	1133.1	1210.8	1277.8	1415.4	1205.9	3854.4	3959.5	4430.3	4245.8
1439141_at	Gpr18	BG145550	0.0072692	0.00178426	0.000216018	0.634996	2.0483	3.22569	28.2	33.2	38.6	26.3	19.6	22.5	19.8	18.3	62.4	80.9	55.9	59.5
1448251_at	9030425E11Rik	BG072972	0.246279	0.000784113	0.000320687	0.848628	2.73677	3.22493	216.7	260.5	341.1	216.9	234.3	233.7	209	201.5	616.6	675.3	638.9	902.3
1427438_at	Pip4k2b	BB143008	0.882538	0.0544725	0.00845591	0.884298	2.85124	3.2243	0.5	9.1	1	1.5	1.2	5.3	3.2	1	11.9	7.5	6.5	8.6
1454758_a_at	Tsc22d1	AU016382	0.274773	3.62588e-07	2.86004e-07	0.949981	3.0624	3.22364	1707.8	1531.6	1670.1	1504.1	1558.9	1626.4	1426.2	1481.3	4649.8	5047.8	4740.1	5203.3
1452459_at	Aspm	BB648052	0.826989	4.08278e-05	2.59724e-05	1.06363	3.42857	3.22348	17.4	22.1	11.6	32.2	18.4	15.9	21.1	33.2	68.2	75	68	74.4
1448833_at	Foxm1	NM_008021	0.513285	0.00259404	0.00516959	1.23602	3.98314	3.22254	16.7	34.5	39.2	22.3	46.7	11.4	43.4	37.8	78.1	134.5	91.6	144.7
1423452_at	Stk17b	AV173139	0.001055	1.02663e-05	1.32653e-06	0.707479	2.27869	3.22086	1005.4	854.6	964.1	819.4	624.3	668.4	632.5	652.5	1947.5	2289.8	2039.5	2025.6
1416002_x_at	Cotl1	NM_028071	0.196434	4.60741e-06	7.77607e-06	0.85633	2.75784	3.22053	198.7	232.4	233.9	196	238.4	178	165.2	155.7	558.4	615.6	555.1	645.4
1429775_a_at	Gpr137b /// Gpr137b-ps /// LOC100044979	AK009736	0.0167349	0.000217984	9.06396e-05	0.794994	2.55969	3.21976	434	415.7	531.1	441.1	384.5	381.2	340	342.7	922.5	1205	1328.9	1207.1
1459470_at	---	AW546412	0.0411055	0.00047085	0.000164587	0.771534	2.4832	3.21852	154.7	122	153.7	114.1	88	109.4	111.6	111.1	277.2	308	370.9	396
1453070_at	Pcdh17	BB305930	0.639377	0.000353336	0.000426584	1.08183	3.47976	3.21656	30	25.9	38	22.2	27.7	41.4	26.4	30.1	83.1	100.6	93.4	126.9
1418396_at	Gpsm3	NM_134116	0.0535893	1.06919e-05	6.53658e-06	0.88232	2.83798	3.2165	193.7	165.5	193.1	171.7	170.8	165.9	149.9	152.2	534.4	550.3	444.1	525.9
1453638_at	9030420J04Rik	AK018520	0.807304	0.00459199	0.00406727	0.932749	3	3.2163	9.8	11.3	9	4.1	10.3	11.2	4.6	5.8	17.4	25.6	24.8	34.8
1436036_at	Whsc1	BB441606	0.472751	0.000495153	0.000381802	0.869234	2.79505	3.21554	34.7	58.4	60.1	57.1	39.3	52.2	30.6	60.7	117	162.1	136.4	172.3
1432826_a_at	Cd80	AK019867	0.0228501	0.00131957	0.000546358	0.738977	2.37566	3.2148	25.7	27.2	27.4	33.1	19.4	19.8	26.3	18.3	58.8	81.7	53.4	75.5
1460346_at	Arsa	BC011284	0.391864	0.000135491	0.000133789	0.93361	3.00065	3.21404	420	462.7	484.7	467.2	463.9	479.8	423.7	345.4	1132.2	1361	1363.1	1648.7
1424383_at	Tmem51	BC003277	0.132198	1.24335e-05	3.26909e-06	0.825164	2.65136	3.21314	148	148	170.7	112.7	112.1	121.3	103.1	141.6	346.4	411.2	396.2	382.4
1428306_at	Ddit4	AK017926	0.00621543	0.033392	1.74149e-05	0.43581	1.40012	3.21268	1574.5	1035.4	1621.4	988.4	515.5	656.1	436.6	666.6	1721.9	1688.9	2066.8	1830.6
1458504_at	Zc3h12d	BB508669	0.47858	7.9655e-06	7.00113e-06	0.891232	2.86238	3.21171	21.3	23.1	17.5	28.2	23.9	18.3	23.9	14.2	67.6	58.8	66.7	64.8
1434695_at	Dtl	AV270035	0.965101	4.89331e-05	6.05468e-06	0.99162	3.18156	3.20845	64.6	34.9	31.4	48.1	44.5	43	37	53	128.6	155.6	138.6	146.7
1448669_at	Dkk3	AK004853	0.196414	5.66523e-06	2.92441e-06	0.886919	2.8452	3.20795	549.4	479.3	647.1	558	501.1	519.6	541	419.5	1415.5	1611.6	1642.4	1686.1
1421430_at	Rad51l1	NM_009014	0.0419581	3.08785e-05	1.33684e-05	0.755152	2.42182	3.20706	20.7	18.4	19	24.4	15.8	18.7	16	11.8	44.4	54.1	48.2	53.1
1424524_at	Dram1	BC021433	0.353562	1.72873e-06	1.79539e-06	1.07683	3.45232	3.206	603.3	514.3	605.6	479	621.7	622.6	616.3	510.8	1778.5	1990.7	1794.9	2038.6
1430332_a_at	Gusb	AK002832	0.151395	0.00113195	0.000742228	0.836213	2.68043	3.20544	175.9	202.6	229	179.5	133.7	197.6	182.9	143.9	408.9	598.2	459.7	642.7
1416783_at	Tac1	NM_009311	0.0557389	0.0880538	0.00331943	0.477148	1.52895	3.20434	50.6	19.9	41.1	52.5	7.7	26	30	14.6	45.7	78.4	72.3	54.5
1456941_at	Tert	BB400861	0.859095	0.00379087	6.24939e-05	0.927602	2.96833	3.2	6.8	1	3.5	10.8	5.1	6.2	4.9	4.3	15.4	17.7	18.6	13.9
1423213_at	Plxnc1	BB476707	0.0424671	0.00107409	0.000166158	0.705667	2.25746	3.19905	83.1	80.8	104.1	60.2	58.6	53.4	54	65.6	179.9	206	144.7	210.3
1419651_at	Nkain1	AK009389	0.558602	0.000167687	0.00014245	1.07611	3.43834	3.19517	29.7	30.1	17.6	26.4	24.8	29.4	26.8	30.7	110.3	80.8	81.5	84.3
1431873_a_at	Tube1	AK010005	0.170104	0.0142921	0.000321114	0.607053	1.93955	3.19502	11.1	15.9	6.8	5.9	4.6	7.8	7.7	4	15.6	18.3	22.5	20.6
1430034_at	Cct4	BE648588	0.790382	5.15781e-05	2.47907e-05	1.0646	3.40108	3.19469	20.7	17.5	26.3	9.8	18.6	26.6	19.9	14	61.3	56.4	67.4	67.6
1452315_at	Kif11	BB827235	0.503725	3.43105e-05	6.61692e-05	0.881783	2.81686	3.19451	25.3	31.3	26.5	20.1	20.5	25.2	14.1	31.2	61.9	75.7	75.9	77.2
1442595_at	---	BE943953	0.59079	0.000507138	0.000677485	0.892562	2.85124	3.19444	16.5	23.2	16.1	16.8	19.5	20.9	7.6	16.8	37.8	55.5	57.4	56.3
1431374_at	6330407A03Rik	AW519657	0.00285651	1.4553e-05	3.21548e-06	0.698549	2.23011	3.19249	151.9	144.5	152.3	123.2	99.5	112.7	85.1	102.2	300.4	338	295.8	341.2
1435956_at	Frmd5	BB277380	0.0124504	0.104469	0.00115268	0.448319	1.43088	3.19167	16	26.5	13.8	24	11	8.9	8	8.1	32.2	30	19	33.7
1420965_a_at	Enc1	BM120053	0.0699339	0.000220834	0.000279976	1.26506	4.03626	3.19058	140.5	124	136.8	78.6	148.5	148.3	151.6	158.7	615.3	426.6	448.8	446.3
1433964_s_at	Fermt3	BG066664	0.0337638	0.000109728	7.24246e-05	0.643897	2.05418	3.19022	136.7	112.4	119.5	98.4	88.3	85.9	90	36.5	260.1	233.2	211	255
1457759_at	A630081D01Rik	BM244095	0.858299	0.00587788	0.00422102	0.933148	2.97679	3.19005	38.7	37.6	23.6	7.8	35.7	6.6	30.4	27.8	64.3	81.2	65.6	109.5
1443624_at	---	AW909042	0.0957847	1.37063e-05	2.06654e-05	1.22632	3.91017	3.18853	39.4	33.2	42.2	28.8	38.9	51.8	41.4	44	149.7	151.4	118.6	141.8
1450652_at	Ctsk	NM_007802	0.218296	5.46572e-06	5.24865e-06	1.11243	3.5456	3.18726	2697.8	1993.3	2683.6	2331.2	2489.8	2551.4	2934.4	2821.5	7785.5	8223.4	9484.9	8919.4
1421959_s_at	Adcy3	AF458089	0.297233	0.00100766	0.000501555	1.64079	5.22943	3.18715	5.7	15.4	54.7	10.5	25.3	42.1	30.1	44.1	86	133.2	124.9	107.2
1455015_at	Tbc1d9	BE853276	0.668675	0.011122	0.00840201	0.921407	2.93638	3.18684	41.4	31.2	40.7	20.3	38.7	24.3	32.2	27.9	66.4	100.6	145.1	80.2
1419481_at	Sell	M36005	0.0817228	0.00632338	0.00308563	0.759236	2.41847	3.1854	36.9	45.3	42.9	31.9	32.9	33.3	19.7	33.3	89.4	122.4	60.8	107.1
1455074_at	Efcab1	AV307860	0.348111	0.000495435	0.000894959	1.19589	3.80569	3.1823	16.5	20.1	14.8	11.9	14.1	15.8	20.5	25.3	49.3	75.8	50.7	65.1
1417936_at	Ccl9	AF128196	0.213255	1.72408e-06	2.50753e-07	0.871356	2.77228	3.18157	898.1	660.2	870.6	970.4	833.9	706.1	778.4	643.6	2303.2	2424.2	2246.7	2449.7
1452679_at	Tubb2b	AA986082	0.503058	0.00462111	0.00392124	0.90282	2.87195	3.18109	65.4	56.3	60.5	80.2	56.3	51.8	80.5	48.3	132.9	222	151.3	247.4
1450500_at	LOC677213 /// Uhmk1	AW012751	0.915679	0.00288636	0.00302338	0.961686	3.05747	3.17928	3	6.9	10.4	5.8	1.3	8.4	7.5	7.9	17	15.2	25.1	22.5
1418176_at	Vdr	AV290079	0.374564	0.00258647	0.000711777	0.830256	2.63907	3.17862	126.4	72.7	76.3	60.4	71.3	72.4	60.9	74.2	272.3	183.9	251.5	178.5
1429273_at	Bmper	AK014221	0.588587	8.14669e-05	7.09032e-05	0.978229	3.10802	3.17719	230.4	255.2	219.2	255.2	235.6	232	237.6	233.9	893.2	738.2	709	643.3
1439956_at	Ms4a6b	BE692425	0.00850674	6.5027e-05	2.56674e-06	0.637627	2.02518	3.17612	92.9	70	102.1	80.5	65.5	57.4	46.8	50.6	180.1	188.5	166.1	165
1426415_a_at	Trim25	AI746456	0.157989	0.0018988	0.000804969	0.816107	2.59163	3.1756	27.1	41	45	44.6	35.9	33.1	31.4	28.3	93.6	103.7	79.3	132.1
1448912_at	C1qtnf1	NM_019959	0.6692	6.90168e-05	3.78282e-05	0.959688	3.04719	3.17519	69.7	81.5	99.1	69.7	80.7	71.9	77.6	76.9	208.9	259.2	229	278
1421714_at	Tmprss3	NM_080727	0.00504053	0.665081	0.00167882	0.334869	1.06298	3.17431	19.4	19.4	12.8	13.5	9.8	1.5	4.3	6.2	18.1	19.8	17.8	13.5
1416442_at	Ier2	NM_010499	0.0940146	0.000521123	5.34072e-05	0.734893	2.33262	3.17409	589.1	401.7	630.5	382.8	353	352.7	337.3	429.8	1277.8	1123.4	1300.4	973.2
1419276_at	Enpp1	AF339910	0.0125725	0.000140114	4.57552e-05	0.712379	2.25886	3.17087	924.6	718.5	920.9	868.3	575.3	649.2	729.5	491.1	1630.6	1901.7	2046.5	2174.3
1450325_at	Angpt4	NM_009641	0.272944	0.013209	0.00155436	0.713467	2.26074	3.16867	56.5	23.4	38.2	21.5	24.1	26.3	28.6	20.6	107.1	70.8	62.9	74.8
1417485_at	Ibsp	L20232	0.107022	0.00141329	0.000933115	0.84378	2.67268	3.16751	332.3	309	351.5	277.2	217.7	308.8	251.1	294	647.8	739.4	1056.3	950.8
1420294_at	---	BB279752	0.040715	0.0933695	0.00102528	0.45539	1.44238	3.16735	9.8	15.6	9.1	19.3	2.2	6	7.6	8.7	16	18.3	24.2	19.1
1415978_at	Tubb3	NM_023279	0.246062	0.000476283	0.000745102	1.45198	4.59887	3.16732	3.8	11.1	6	14.5	17	8.3	11.1	15	43.6	33.8	34.8	50.6
1420453_at	Crygs	NM_009967	0.0483243	0.0556142	0.00331403	0.495238	1.56825	3.16667	22.5	12.5	12	16	4.1	13.9	6.4	6.8	19.5	29	19.9	30.4
1424784_at	Gm13139	AV047635	0.0358493	0.0019131	0.000732903	0.732168	2.31847	3.16659	124.4	169	134.3	133.1	119.1	119.7	90.6	81.2	357.1	262.8	275.6	404.7
1439078_at	Klhl4	BB037068	0.0279109	0.000386335	7.48106e-05	0.668227	2.11596	3.16654	35.7	51.1	53.1	52.4	33.9	32.6	39.8	22.2	103	118.4	96.9	88.6
1440390_at	Fam171a2	BE980997	0.79224	0.000391788	0.000325741	1.09441	3.46503	3.16613	22	13.9	16.9	4.4	23.9	11.5	9.7	17.5	51.5	43.3	45.4	58
1447668_x_at	Efemp2	BB472459	0.155053	0.0331414	0.00153313	0.565744	1.79041	3.1647	169	66.3	81.8	87.5	68.9	40.3	91	28.7	230	173.1	145.7	175.6
1417450_a_at	Tacc3	NM_011524	0.221986	0.000426757	0.000691899	1.20841	3.82389	3.1644	32.8	52	39.3	40	42.7	45.5	46.2	63.9	124.7	139.8	164.7	198.3
1457797_at	AI605517	AV340788	0.416452	0.00494859	0.000187396	0.760652	2.40695	3.16433	55.9	105.3	124.4	33.6	59.8	45.4	64.4	73.2	163.5	195.4	176.5	232.9
1458394_at	Slc6a17	BB769612	0.138418	0.0598208	0.000373664	0.5064	1.6024	3.1643	53	32.8	20.5	18.7	6.2	12.2	18.2	26.7	50.2	46.5	55.4	48.2
1448777_at	Mcm2	NM_008564	0.385733	1.61947e-05	2.04387e-05	1.12986	3.57423	3.16341	84.5	107.3	84.9	126.8	122.4	96.4	99.9	137.2	363	326.8	342.1	410.3
1447116_at	---	BB214530	0.0261401	0.0963504	0.00864435	0.48008	1.51793	3.16183	15.4	13.6	12.7	8.5	2.6	9	3.7	8.8	19.1	25.3	20.7	11.1
1426062_a_at	Casp7	U67321	0.213845	3.21096e-05	5.68065e-06	0.822797	2.60129	3.16152	62.2	55.9	44.2	38.6	46	47.5	39.5	32.3	125.9	129.6	122.5	144.6
1435598_at	---	BE996371	0.858798	0.00451186	0.00391781	0.968304	3.05864	3.15876	12.8	12.5	16.3	21.5	16.9	14.2	11.1	18.9	33.7	65.4	40.3	53.6
1418080_at	B4galt2 /// Ccdc24	AW125856	0.551937	6.5018e-05	6.0544e-05	0.901231	2.84599	3.15789	61.3	77.7	99	95.1	82.5	93.1	77.1	47.5	199.6	259.5	248.7	240.2
1458051_at	A230048O21Rik	BB242501	0.248436	0.00656422	0.00309024	0.81072	2.55779	3.15496	9.1	17.3	16.3	17	9.3	13.4	13.9	11.8	53.3	33.2	28.6	37.6
1418824_at	Arf6	BI248938	0.0307872	0.000108195	0.00020471	1.29779	4.09233	3.15331	36.2	45.7	37	34.9	43.2	51.3	58.3	46.8	129.8	142.3	170	187.3
1450882_s_at	Gpr137b /// Gpr137b-ps /// LOC100044979	AK010724	0.0319819	0.000586783	0.000318947	0.838375	2.64341	3.15302	221.4	225.9	258.4	200.1	179	198.2	199.7	182.5	456.1	580.8	639.6	717.9
1438455_at	Pabpc4l	AI464220	0.27878	0.00435453	0.00175494	0.756178	2.38386	3.15251	12.8	19.7	9.9	18.3	12.4	11	16.3	6.2	34.7	43	25.1	41.9
1419703_at	Col5a3	NM_016919	0.834527	1.83474e-06	2.01139e-07	1.02211	3.22058	3.1509	845.6	555.6	869.7	727.1	815.8	709	799.1	740.4	2469.6	2495.6	2243.8	2446.3
1422101_at	Tnfrsf23	NM_024290	4.22796e-06	5.34502e-07	1.66604e-07	0.664548	2.09389	3.15085	50.9	50.4	52	51.2	33.5	31.8	36.8	33.8	100.7	106	112.4	109.1
1421792_s_at	Trem2	NM_031254	0.428086	0.000199755	8.6969e-05	0.906336	2.8547	3.14972	222	142.1	237.5	200.2	176.9	165.3	199.4	185.1	524.4	592.2	492.8	679.5
1448318_at	Plin2	NM_007408	0.481868	2.12141e-07	1.45767e-07	1.06113	3.34211	3.14957	734.2	544.5	643	698.8	796.5	660.2	665.4	658.6	2288.3	2142.6	2226.2	2100.9
1416497_at	Pdia4	J05186	0.129231	4.50976e-05	3.69521e-05	0.913245	2.87601	3.14922	396.2	344	362.9	363.1	365.1	353.9	310.2	309.8	1079.6	882.3	1196.9	1058
1429679_at	Lrrc17	BB503935	0.684592	0.000316671	0.000246302	0.964856	3.03836	3.14903	211	298.5	260.1	288.9	272.5	254.6	265	229.2	613.7	947.8	800.5	854.1
1437785_at	Adamts9	AV364944	0.535839	3.49172e-05	1.0406e-06	0.895803	2.81945	3.1474	236	170	237.9	121	182.5	185.9	138.2	178.6	499.3	568.1	536.8	552.4
1451987_at	Arrb2	BC016642	0.899208	8.80539e-07	6.39051e-07	1.01192	3.18477	3.14725	290.4	254.7	354.2	300	318.3	346.1	274.7	274.5	1000.9	885.6	967.8	965.2
1419043_a_at	Iigp1	BM239828	0.0589304	0.000854526	0.000532079	0.83361	2.62301	3.14657	212.8	230.5	185.7	214.8	177	208.4	153.3	164.7	629.9	494.5	428.7	660.2
1434728_at	Gria3	BM220576	0.0576956	0.000729354	0.00127577	1.27513	4.01131	3.14581	20.5	20.4	22.5	16.2	25.8	28	27.9	19.8	87.1	72.3	58.2	101.7
1429734_at	4632434I11Rik	AK014608	0.732414	0.000153025	0.000117442	1.03484	3.25419	3.14464	21.7	16.2	16.3	23.3	21.1	20.4	19.5	19.2	50.6	74.3	64	63.3
1421362_a_at	Frk	NM_010237	0.542146	0.000181511	2.79832e-05	0.887701	2.79144	3.14458	19.3	16.1	10.6	10.1	14.8	13.4	11.1	10.5	36.1	34.9	42.4	43.2
1428743_at	Bri3bp	BB028923	0.0256436	0.000116918	5.34808e-05	0.824651	2.59297	3.14432	133.8	108.2	122.5	107.7	96.7	95.1	91.4	106.2	253.1	331.2	296.2	343.9
1458296_at	---	BI465650	0.708157	0.000517862	0.00039476	0.968295	3.04349	3.14314	177.2	141.1	124.4	134.5	139.9	141.1	143.5	134.4	371.7	448.3	381.7	555
1425458_a_at	Grb10	AF022072	0.0267498	4.06221e-07	4.92975e-07	1.17523	3.69334	3.14264	1409.2	1144.5	1201.6	1193.5	1588.4	1430.9	1407.3	1389.4	4392.4	4896.9	4330.7	4657.6
1415849_s_at	Stmn1	BC010581	0.842588	7.28231e-05	0.000155923	1.02909	3.23283	3.14145	624.7	557.4	691	684.6	747.9	597.9	452.4	833.9	1672.4	2029.3	2319.7	2247.2
1446331_at	Ptgfr	AV244075	0.911481	3.31473e-05	1.11176e-05	0.98426	3.09001	3.13943	54.9	54.5	61	32.9	57.1	53.4	45.2	44.4	154.2	176.3	140.3	157.4
1427275_at	Smc4	BI665568	0.155275	0.000102881	0.000121259	0.815662	2.56036	3.139	213.5	246.8	257.7	234.6	194.4	140.7	179.8	262.1	628.5	532.6	564.1	713.8
1425750_a_at	Jak3	L40172	0.0948682	3.06684e-07	1.8615e-06	0.846896	2.65832	3.1389	100	96.1	93.3	94	100.2	81.5	77.9	65.1	248	257.3	242.5	271.4
1442434_at	D8Ertd82e	BM195829	0.47808	1.16581e-05	3.33693e-06	1.1161	3.50185	3.13759	83.4	61.4	54.4	43.7	76.3	72.3	58.1	64.4	189.8	224.3	214.8	221.7
1418421_at	Bcl6b	NM_007528	0.530682	0.00155834	0.000660259	0.863058	2.70786	3.13751	75.1	70.4	112	49.2	80	60.2	80.8	43.7	191.8	191.2	180.2	267.3
1423537_at	Gap43	BB622036	0.0328846	0.000459494	0.00100364	1.39819	4.38612	3.137	15	18.6	14.1	18.6	29	21.8	22.7	19.2	62.8	96.7	64.1	67.2
1455197_at	Rnd1	BE852181	0.24511	0.00014976	6.86845e-05	0.827502	2.59561	3.13668	34.1	26.5	37.7	24.6	22.9	29.9	19	29.9	92.7	82	72.1	72.2
1454920_at	Uhrf2	BQ266387	0.613198	0.000484148	0.000559354	0.927072	2.90744	3.13616	172.6	169.2	218.1	173.7	219.2	117	153.2	190.7	609.8	390	591.8	541.3
1448534_at	Sirpa	AB018194	0.000675358	3.09528e-05	8.20589e-06	0.730364	2.29026	3.13577	356.6	333.9	382.3	323.9	252.9	274.9	246.7	245.6	731.4	874.7	736.2	856.5
1438571_at	Bub1	BB479886	0.637507	0.00155734	0.000624652	0.893983	2.80229	3.13462	8	8.7	13	5.2	6	7.7	10.4	7.1	30.7	25	22.7	19.4
1448748_at	Plek	AF181829	0.0279594	6.2103e-05	4.87951e-05	0.811248	2.54289	3.13455	528	511.3	546.4	516	423.5	471.7	477.3	332.5	1394.9	1367.6	1101.8	1480.1
1426410_at	Pdk3	AV086243	0.322809	7.14378e-05	9.96369e-05	1.09179	3.42115	3.13351	114.7	101.3	127.2	108.9	124.7	114.9	108.9	145.1	304.1	402	419.8	420.8
1419442_at	Matn2	BC005429	0.036054	5.03325e-05	4.31355e-05	0.782546	2.45194	3.13329	367	361.2	379.3	407.3	371.3	309.4	265.1	239.6	810.1	1001.6	871	1031.5
1448228_at	Lox	M65143	0.276638	2.95371e-06	1.97754e-07	0.896241	2.8077	3.13275	3052	2020.7	2787.9	2603.1	2194.4	2345.2	2488.7	2349.7	7649.8	7042.2	7023.6	7663.3
1439030_at	Gmppb	BI410722	0.0343923	1.09492e-06	8.3902e-09	0.809524	2.53564	3.13227	200	148.2	194.9	166.7	147	139.7	148.1	139.8	438.1	440.8	455.1	465.8
1419184_a_at	Fhl2	NM_010212	0.384731	0.000539872	6.49599e-05	0.808352	2.53197	3.13226	230.9	172.8	166.5	88.3	112.9	158.5	97	163.9	347.6	443.4	425	451.3
1451550_at	Ephb3	BC014822	0.463715	4.55648e-06	3.3045e-05	1.1554	3.61846	3.13177	107.4	72.4	88.8	111.7	109.3	97.2	77.4	155.5	338.5	328.6	326	383
1437549_at	2810408I11Rik	BB093469	0.960541	0.000252445	0.00018313	1.01657	3.18343	3.13152	25.3	33.7	7.9	23.6	33.8	19.2	11.4	27.6	63.1	72	72.8	80.2
1416235_at	Lrrc59	AW476171	0.00433898	2.08218e-05	1.05149e-05	0.817647	2.56004	3.13098	409.2	354.4	399.8	384.7	323.6	341.5	293.3	307.4	864.7	962.7	1054.9	1080.9
1422601_at	Serpinb9	NM_009256	0.292027	5.02513e-06	2.93308e-06	0.91381	2.86089	3.13073	125.8	115.2	145	112.9	121.2	103.3	126.3	105.1	358.9	388.6	323.3	356.5
1417756_a_at	Lsp1	NM_019391	0.934182	1.83208e-05	1.58464e-05	1.00563	3.14822	3.13058	1263.7	1129.1	1394.2	1448.4	1398.9	1314.1	1367.7	1184.2	3616.6	4667	3996.3	4202.3
1428975_at	Susd3	AK003860	0.0150025	0.00358839	0.00188052	0.795948	2.49132	3.13	32	39	34.4	32.8	29.3	30.1	24	26.6	73.7	109.5	61.9	99.2
1443414_at	C78513	C78513	0.0696287	0.00705867	0.00270443	0.676633	2.11739	3.1293	25.5	25.9	19.1	19.8	21.9	10.6	17.8	10.8	64.2	49.5	38.3	39.2
1425065_at	Oas2	AB067535	0.00116691	0.00146512	0.000206413	0.628556	1.9665	3.1286	108.6	85.4	86.6	95.5	63.2	54.5	64.6	54.1	216.9	169.5	149.3	203.9
1443088_at	9930031P18Rik	BB420529	0.299162	3.53284e-06	1.47488e-06	0.919074	2.87452	3.12763	202.7	165.4	203.5	162.4	183.3	164.7	173.8	152.8	534.3	504.2	496	575.4
1445882_at	Cd300lb	BB230267	0.710605	5.3399e-05	6.42257e-05	0.962689	3.01082	3.12751	94.5	77.1	95.4	84.1	101.2	69.3	76.4	91.1	298.6	282.6	222.1	253.8
1454499_at	4933431C10Rik	AK017001	0.538607	0.000339385	0.000625293	1.25362	3.92029	3.12717	2.9	2.4	6.2	2.3	5.1	3	2.5	6.7	15	10.6	14.9	13.6
1432360_a_at	Tmtc4	AK015064	0.587046	1.09865e-05	9.789e-06	0.954406	2.98309	3.1256	46	52.4	42.6	54.2	54.6	45.8	43.6	42.3	165.4	139.1	135.8	142
1438861_at	Bnc2	BB482899	0.210532	2.56061e-06	2.52249e-06	0.945694	2.95526	3.12497	405.3	379.4	393	369.1	386.5	388.1	350.3	337.9	1147	1263.6	1092.4	1068.2
1435313_at	Cd200r4	BB770873	0.179008	0.00260485	0.000304146	0.745121	2.32836	3.12481	17.6	16.3	32.2	21	16	17.7	15.7	15.5	43.4	45	50.7	63.7
1442753_at	Tnfaip8	BF321807	0.0652446	0.00309619	0.00112914	0.74538	2.32854	3.12397	9.4	13.9	14	11.4	11.1	9.7	7.5	8	34.8	21	25.1	32.5
1449244_at	Cdh2	BC022107	0.0663476	0.00954377	0.00270695	0.719488	2.24721	3.12335	178.4	124.9	143.4	99.8	90.5	110.5	94	98.2	184.4	316.9	368	358.8
1460273_a_at	Naip2	NM_010872	0.0085092	8.25697e-06	1.84017e-06	0.767576	2.39717	3.12303	47.5	47.3	54	41.8	39.7	37.7	36	32.9	118.7	108.5	106.4	123.3
1448561_at	Ncf2	NM_010877	0.239898	5.96034e-05	9.06453e-06	0.85212	2.66099	3.12279	231.4	150.9	248.3	185.6	182.9	173.4	184.3	154.9	572.9	584.1	469.1	545.8
1441643_at	2012-03-03	AV272467	0.865353	7.9873e-06	2.01134e-06	1.02701	3.20664	3.12231	104.4	75.2	69.5	58.2	72.7	78.2	67.8	96.9	246.7	257.9	254	226.8
1425124_at	Rnf183	BC025512	0.339193	0.0450347	0.00721291	0.648936	2.02482	3.12022	1.6	7.7	7.7	11.2	1.8	4.3	4.1	8.1	14.2	20	12.4	10.5
1450357_a_at	Ccr6	NM_009835	0.00242307	0.000419159	1.66405e-05	0.599691	1.87017	3.11856	32.7	38.1	26.2	32.4	21.6	18.7	17.5	19.8	59.5	66.1	51.9	64.5
1440339_at	Enpp1	AW910504	0.40676	2.8683e-05	7.9314e-06	0.898544	2.80137	3.11768	437.9	360.8	580.2	441.6	452.3	415.1	428.9	339.5	1158	1313.4	1214.6	1413.9
1437186_at	BC055324	AV132065	0.0975142	0.00240293	0.00149021	0.564829	1.76006	3.11609	19.3	13.6	20.7	13.5	17.9	9.3	2.3	8.4	33.9	27.3	26.4	30.5
1418464_at	Matn4	NM_013592	0.165398	0.0126026	0.00550586	0.787712	2.45344	3.11464	350.6	211.8	416.8	365.2	291.8	273.9	244.5	248.8	539.9	1160.7	716.8	881
1433956_at	Cdh5	AW543698	0.639668	0.000435107	8.52934e-05	0.913085	2.84014	3.11048	276.7	144.5	172.5	143.8	148.2	180.4	182.5	162.3	441.2	487.8	555.5	610.1
1417019_a_at	Cdc6	NM_011799	0.839113	4.34728e-06	2.98826e-06	0.970822	3.01768	3.10838	28.8	31.1	20.1	33.1	34	22.7	29.4	23.7	81.7	82.8	91.8	85
1445481_at	AI317158	BM125070	0.0828431	7.98766e-06	9.19474e-06	0.785329	2.44013	3.10714	53.6	41.4	43.5	46.9	41.2	37	25	42.4	108.2	104.8	118.3	121.1
1438879_at	---	BM214132	0.615309	0.0404486	0.00188659	0.734908	2.28346	3.10714	13.1	2.9	20	2.1	7.2	2.9	5.3	12.6	21.5	20	18.4	27.1
1432361_a_at	Cenpp	AK014919	0.187619	0.001225	0.000342049	0.772546	2.39987	3.10644	29.8	37.9	31.8	51.3	37.7	26.7	23	29.1	89.9	79.5	79.7	112.8
1421319_at	Ptgfrn	NM_011197	0.32851	2.26804e-05	3.6629e-05	1.10092	3.41972	3.10625	25.1	21	21.2	19.9	19.1	26	24.1	26.8	65.8	77.7	85.2	69.5
1453234_at	1300002K09Rik	AV222559	0.0305306	0.0512286	0.00795406	0.554622	1.72269	3.10606	13.9	9.6	14.4	9.7	9	7.5	2.7	7.2	16.6	29.4	14.6	21.4
1449528_at	Figf	NM_010216	0.0339346	5.0303e-05	3.03038e-05	0.85177	2.6454	3.10577	240.3	211.8	240.7	208.5	207	206	174.9	179.8	518.6	688.6	581.6	595.5
1450906_at	LOC100044106 /// Plxnc1	BB476707	0.312049	0.0197881	0.00567307	0.737864	2.29126	3.10526	13.2	26.7	21.8	10.4	18.7	12.7	8.9	12.9	35.5	49.6	26.3	53.8
1455885_at	Amz1	AV238106	0.0912083	0.0224777	0.00434999	0.653367	2.02868	3.10496	18.2	26.8	12.4	22.8	17.2	11.1	13.7	10.4	22.7	45.5	46.8	47.7
1439843_at	Camk4	AI840829	0.00452028	5.81816e-07	1.60954e-06	1.31452	4.07903	3.10307	45.2	43.2	50.8	46.8	52.8	65.9	61.8	64	194.2	180.1	178.9	205.5
1428113_at	Tmtc4	BB278364	0.673571	2.40249e-05	1.44914e-05	0.970853	3.01027	3.10064	291.5	261.1	211.4	258.4	253.7	250.5	239.1	249.3	826.1	701	697.6	853
1439407_x_at	Tagln2	AV212626	0.203369	5.72808e-05	0.000184745	1.29807	4.02464	3.10048	739.2	459.9	521.3	650.2	626.5	803.2	1057	590.5	2203.5	2051.8	2815.6	2469.9
1426706_s_at	Xylb	BB431728	0.787339	0.00326432	0.00121704	0.891832	2.7638	3.09901	13.1	18.8	11	2.4	2.6	13.4	9.8	14.6	31.1	24.9	37.2	32
1421595_at	Fam184b	NM_021416	0.951292	0.00524307	0.00183509	0.96281	2.98347	3.09871	12.7	8.4	1.6	1.5	7.9	2.6	11.1	1.7	17.4	16.7	19.3	18.8
1456735_x_at	Acpl2	BB458645	0.0410061	3.5977e-05	2.04147e-05	0.873789	2.70733	3.09838	208.7	182.9	221.5	191.9	189.3	170.7	174.8	168.6	460.6	570.1	545.8	602.9
1428508_at	Tbc1d2b	AK004526	0.362654	4.46262e-06	2.69816e-06	0.945492	2.92886	3.09772	582.3	526.5	647.9	534.7	533.6	559.4	570.7	502.8	1529.5	1821.1	1614.5	1746.1
1456012_x_at	Rnaset2a /// Rnaset2b	AV101824	0.476863	3.3046e-06	2.26924e-06	0.938568	2.90363	3.09369	870.2	787.1	867.8	663.8	843.7	775.9	733.4	640	2301.5	2309.7	2131.1	2517.1
1435345_at	Cercam	AV323203	0.571904	3.47353e-05	3.93583e-05	1.05205	3.25446	3.09344	267	260	332.6	262.4	267	306.5	338.5	268.4	761.8	968.8	905.6	1015.3
1430826_s_at	Gcnt2	AK019924	0.174886	9.22988e-05	1.7273e-05	0.799924	2.4737	3.09242	86.3	62.2	52.9	61	58.8	52.3	59.2	39.6	156.7	174.2	143.2	175
1423401_at	Etv6	BB068442	0.124416	5.15908e-05	0.000100771	0.736842	2.27794	3.09149	50.5	38.6	40	40	41.7	15.4	32.9	34.6	86.4	95.8	108.3	94.7
1419712_at	Il3ra	NM_008369	0.382743	4.42084e-07	1.00764e-06	1.11214	3.43817	3.09148	72.4	82.9	100.3	100.2	103.8	111.7	104.9	75.3	291.8	304.5	303.9	323.1
1422039_at	Tnfrsf22	NM_023680	0.0737986	9.62498e-05	2.46067e-05	0.71059	2.19675	3.09145	30.6	47.8	40.5	47.3	37.2	22.7	35.1	23.1	86.7	98.3	83.4	96.7
1416503_at	Lxn	NM_016753	0.422541	0.000173118	0.000112596	0.937903	2.89793	3.0898	480.3	376.4	500.6	396.4	431.6	413.5	392.8	406.9	992.7	1316.1	1336.5	1436.8
1456655_at	---	BM231698	0.254957	3.55905e-05	2.28743e-05	0.91007	2.81126	3.08907	494.3	411.1	392.9	391.9	412.7	395.3	398.1	332.1	1036.7	1237.9	1134.3	1342.7
1418895_at	Skap2	NM_018773	0.0741914	4.72878e-06	4.13933e-07	0.834966	2.57776	3.08726	494.1	379.1	524	420	397.1	379.3	389.5	351.4	1073.8	1211	1198.7	1200.8
1449839_at	Casp3	BG070529	0.74243	2.39515e-05	1.34699e-05	0.969892	2.99356	3.08648	250.2	194	284.1	264.8	244.6	265.9	219.6	233.1	646.7	721.8	815.9	788.5
1423240_at	Src	BG868120	0.734812	0.000202547	0.000135324	1.0523	3.24734	3.08593	32.6	17.1	30.1	33	29.8	33.8	25.1	30	76.9	85.8	93.9	109.7
1428842_a_at	Ngfrap1	BI407690	0.231252	1.59224e-05	2.93309e-05	1.13908	3.51508	3.0859	259.9	200.4	256.7	231.4	307.5	279.5	211.4	281.9	707.8	880.6	916.7	828.6
1437279_x_at	Sdc1	BB533095	0.523415	2.98387e-05	0.000132795	1.14838	3.54203	3.08436	343.1	280.3	382.7	234.6	320.1	277.6	294.4	532.7	952.1	1041	1183.5	1218
1431399_at	Adamts9	BI319712	0.0765403	0.0224875	0.00345154	0.648639	1.99853	3.08111	69.8	85.7	79.2	37.1	41.6	52.8	40.6	41.3	95.5	182.1	113.4	152.2
1456240_x_at	Cdca4	BB329505	0.270225	0.000311714	0.000113095	0.858997	2.64469	3.07881	51.7	87.1	68.5	77.8	67.7	52.5	65.3	59.4	197.4	218.6	152	186
1421839_at	Abca1	BB144704	0.666231	0.00124922	0.00116085	0.957987	2.94922	3.07856	170	179.8	175	136.9	130	188	159.4	156.5	419	596.6	368.5	567.4
1434211_at	Sh3bgrl2	BB352548	0.501715	1.33204e-05	2.78229e-05	0.909597	2.79972	3.07798	42.5	32.8	35.2	33.3	35.2	26.1	26.7	42.8	89.7	110.3	97.6	105
1451374_x_at	Cklf	AY047360	0.154434	1.30262e-06	1.03935e-06	0.863804	2.65828	3.07741	44.1	36.5	45.3	37.1	28	36.2	36.9	39.7	105.7	107.7	116	103.9
1418809_at	Pira2	NM_011087	0.622237	0.00358852	0.00342075	0.951456	2.92693	3.07626	49.3	44.9	54.4	47.1	41.4	58.3	46	40.5	101.2	140.7	132.5	198.4
1428509_at	Myo1e	AK018649	0.548618	0.000197363	7.8879e-05	0.925701	2.8472	3.07573	325.2	214.6	362.9	264.2	276.9	243.6	271.7	288	666.1	861.9	852.2	942.2
1437629_at	Arhgef19	AV321315	0.308562	0.000777154	0.000569663	0.898598	2.76321	3.07503	49.6	40	53.2	42.6	42.9	36.8	37.5	49.4	117.1	97.3	148.6	149.3
1423091_a_at	Gpm6b	AK016567	0.226558	8.38894e-06	1.03111e-05	1.08085	3.32288	3.07431	412.7	399	477.6	407.6	486.5	479.5	461.1	407	1214	1485.3	1421.6	1517.7
1428717_at	Scrn1	AW490544	0.0200711	0.0110147	0.00212656	0.551089	1.69403	3.07396	37	46.7	50.1	45.3	38.9	29.1	16.6	14.1	55.4	89.7	70.3	88
1452534_a_at	Hmgb2	X67668	0.402734	1.75551e-05	2.79899e-05	1.1436	3.5153	3.07389	214.6	178.5	258.8	158.7	222.4	191.9	212.5	300.2	609.8	760.8	724.5	754.4
1451362_at	Rab7l1	BC016133	0.500635	2.63946e-06	5.25205e-07	0.944112	2.90199	3.07378	311.5	228.5	263.6	314.7	282.7	263.4	248.8	260.9	881.7	788.8	788.8	786
1450567_a_at	Col2a1	NM_031163	0.0137357	0.0139173	0.00311479	0.650928	2.00072	3.07364	444.9	383.9	506.3	340.2	214.5	288.8	319.8	267.4	751.6	549	1055.1	996.1
1450678_at	Itgb2	NM_008404	0.170315	0.000168791	2.56933e-05	0.797518	2.45124	3.07358	615.7	521.2	885.6	644.4	559.8	554.5	593.9	418.7	1430.2	1729.5	1555.9	1821.6
1448328_at	Sh3bp2	BC010198	0.0024931	8.81912e-05	1.8866e-05	0.705332	2.16741	3.07289	108.8	128.2	127.1	106.6	82.7	93	82.2	74.1	264.4	227.6	239.4	288.8
1447561_at	---	BE952998	0.751312	0.0277894	0.0075719	0.80137	2.46233	3.07265	1.6	16.1	9.3	2.2	8.1	12.5	1	1.8	14.3	18	18.4	21.2
1456739_x_at	Armcx2	BB392869	0.163406	5.87753e-05	4.58508e-05	0.922914	2.8354	3.07223	408	358.9	422.5	412.7	403.5	377.6	352.9	344.6	1059.4	1227.5	972.3	1283.4
1445746_at	Eif4h	BB118894	0.00353967	0.00213468	0.000128483	0.564014	1.7327	3.07209	24.7	27.2	34.8	28.9	19.6	16.6	11.7	17.3	58.4	52.9	46.6	42.4
1421937_at	Dapp1	NM_011932	0.00178003	0.000243023	2.00301e-05	0.63457	1.94791	3.06965	66.9	54.8	72.5	59.2	36.8	37.3	43.4	43.3	139.1	111.2	113.5	129.8
1418269_at	Loxl3	NM_013586	0.410085	6.47915e-05	4.81338e-05	0.942916	2.89406	3.06927	429.5	379.2	486.6	405.7	403.2	429.8	412.1	358.8	1181.5	1030.2	1334.4	1376.7
1424770_at	Cald1	BI248947	0.886408	2.49826e-05	1.84891e-05	1.01511	3.11551	3.06916	885.3	699.4	883	630.6	829.4	866.3	786.8	662.6	2482.5	2637.8	2052.3	2480.2
1416573_at	Pofut2	BC018194	0.161351	1.01447e-05	9.52285e-06	0.914523	2.80603	3.0683	133.7	129.9	118.9	134.6	118	134.6	113.3	107	322.1	354.9	370.7	403.3
1434980_at	Pik3r5	AV230647	0.0596801	1.46766e-05	4.49566e-06	0.841496	2.58192	3.06825	126.6	94.9	119.7	108	98.6	99.2	95.1	85.1	319.2	274.5	266	300.1
1452410_a_at	Fes	BG867327	0.0489845	6.57672e-05	2.79297e-05	0.813573	2.4961	3.06807	189.2	161.7	202.8	215.5	174.1	165.5	153.1	133.1	469.7	548.4	416.9	485
1434758_at	Crispld2	BB745401	0.161299	2.50495e-07	6.94609e-07	1.12515	3.45155	3.06763	505.5	581.8	621.6	584.3	741.4	608.1	663.7	567	2056.4	1836.9	2039.7	1982.1
1424041_s_at	C1s /// LOC100044326	BC022123	0.270599	0.000345832	0.000405532	1.08878	3.33931	3.06702	756.8	808	971.5	766.3	945.8	945.9	902.8	801.3	2978	3379.6	2220.8	2450
1440801_s_at	Adrbk2	BB391602	0.199673	7.58054e-05	5.43049e-05	0.886423	2.71794	3.06619	68.8	75.6	61.5	60	56.7	70.1	55.9	53	155.4	170.9	187.8	208.6
1438453_at	Rad51c	BB234087	0.408306	0.000399084	0.00441774	1.45455	4.45974	3.06607	12.5	9.9	10.2	5.9	6.4	19.2	5.7	24.7	40.8	37	56.2	37.7
1451446_at	Antxr1	AF378762	0.284571	3.06923e-05	4.70548e-05	1.09298	3.35058	3.06555	1200.1	1228.9	1423.8	1247.3	1503.3	1311.8	1569.9	1189.3	3616	4790.3	4091.5	4590.5
1426340_at	Slc1a3	BB357585	0.254558	0.000444553	6.79752e-05	0.806093	2.47095	3.06534	100.6	75.9	133.8	77	85.8	83.8	82.9	59.7	243.5	255.5	194.7	263.3
1434740_at	Scarf2	BB484759	0.424025	0.00017088	0.000158553	1.07044	3.28069	3.0648	463.5	446.2	571.2	388.8	490.5	512.2	503.2	495.5	1220.1	1644	1474.1	1795.7
1433678_at	Pld4	BB210623	0.356842	9.45859e-06	8.6811e-06	1.06322	3.25746	3.06377	207.4	176.1	221.5	179.6	219.8	192.6	213.7	208.1	693.6	677.2	558.2	626.8
1422191_at	Cd200r1	NM_021325	0.048708	0.00341498	0.00183884	0.743075	2.27632	3.06337	34.8	34.5	38.9	36.2	35.6	22.5	29.7	19.5	78.2	109.4	62.6	78.5
1421045_at	Mrc2	BB528408	0.135288	1.06376e-05	4.40378e-06	0.892175	2.73238	3.06261	759.9	647.3	858	794.4	717.4	690.7	690.9	630.7	1887.8	2105.9	2050.4	2315.9
1422668_at	Serpinb9b	NM_011452	0.0222798	0.269555	0.00383515	0.413333	1.26462	3.05955	31.1	21.1	15.1	30.2	8.9	16	12.1	3.3	33.4	31.4	20.6	37.9
1417870_x_at	Ctsz	NM_022325	0.589219	1.40638e-06	9.12496e-07	0.97078	2.96982	3.05921	956.9	968.2	1118.3	1121.6	1022.3	1059.1	1031.3	930.6	2810.6	3268.6	3152.2	3137.9
1415860_at	Kpna2	NM_010655	0.792022	6.54251e-06	5.07114e-06	0.980046	2.99729	3.05832	499.4	388.9	415.4	470.4	434.5	409.2	404.1	490.9	1188.8	1326.2	1343.8	1458.7
1416016_at	Tap1	AW048052	0.16671	1.88528e-07	2.92433e-07	0.907215	2.77413	3.05785	150.8	164	159.7	140.9	135.2	154.1	120.5	148.5	433.2	447	422.2	404.8
1448898_at	Ccl9	AF128196	0.225825	2.92046e-07	5.82403e-07	0.888299	2.71556	3.05703	368.6	301.4	355.9	312.5	351.6	299.4	295.8	242.1	889.3	929.4	943.2	872.6
1451160_s_at	Pvr	BB049138	0.504679	2.35794e-05	4.35481e-07	0.90141	2.75556	3.05694	194.4	114.9	220.2	158.2	172.3	151	139.1	157.5	504.6	457	480.6	452.8
1457707_at	Mctp2	BB817942	0.128412	8.25594e-05	5.37263e-05	0.783893	2.39597	3.05651	18.1	20.5	21.1	14.8	15.1	15.7	9.6	18	46.5	37.9	48.9	45.2
1448384_at	Pofut2	BC018194	0.347694	0.000523553	0.000101397	0.829219	2.53407	3.05597	311.8	265.3	226.3	144.6	197.6	148	205.8	234.7	529.5	532.1	686	654.7
1422747_at	Chek2	NM_016681	0.380927	1.56811e-05	8.88145e-06	0.906189	2.7667	3.05312	62.4	45.5	47.7	48	50.8	45	37.4	51.3	123.4	142.9	146.2	150.8
1415828_a_at	Serp1	BF658806	0.331626	9.43369e-08	9.71862e-09	0.934384	2.85249	3.05281	706.3	680.8	754.2	580.6	680.1	661.4	613.6	588.2	1880.5	1966.1	1973.7	1943.9
1450941_at	Sdcbp	AV227603	0.287367	5.41282e-05	1.59782e-05	0.880732	2.68813	3.05216	321.3	254.9	357.4	241.9	270	275.4	267.6	222.3	703.3	807.8	755	893.8
1452115_a_at	Plk4	BB706079	0.87508	5.48612e-05	2.1643e-05	0.974805	2.97394	3.0508	37.2	27.4	19.4	31.1	33.5	24.1	24	30.6	73.2	87.2	91.2	90.7
1457745_at	Gpr4	AA798732	0.430794	3.56009e-05	0.00845307	1.72016	5.2428	3.04785	6.8	7.5	3.5	6.5	25.7	6.5	5.4	4.2	35.7	25.6	32.3	33.8
1423140_at	Lipa	AI596237	0.308711	2.39067e-05	2.34011e-05	0.904515	2.75653	3.04752	171.7	159	198.2	164.4	181.6	160.6	161.3	123.6	470.7	482.9	418.8	538.7
1434986_a_at	Sec61a1	AI327023	0.0107349	3.08091e-05	1.63704e-05	0.788689	2.40324	3.04714	428.1	497.5	476.9	496.6	421	355.6	321.9	399.3	1041.8	1080.2	1139.7	1302.3
1442459_at	Adamts19	BG070198	0.163538	0.469827	0.00638455	0.42402	1.29167	3.04624	1.9	17.7	7.6	13.6	3.7	0.9	5.8	6.9	11.2	16.5	15.6	9.4
1426505_at	Evi2b	AI122415	0.0231481	2.38979e-05	9.7075e-06	0.800978	2.43896	3.04498	118	103.2	125.7	102.8	103.9	83.6	84.2	88.5	282	292.5	236.8	285.5
1433930_at	Hpse	BG094050	0.846655	0.000303951	0.000223685	0.981481	2.988	3.04438	74	100.3	113.6	95.5	103.3	91.9	90.2	90.9	241.5	297.6	256.6	349.9
1451564_at	Parp14	BC021340	0.120383	0.000591177	0.000200793	0.809189	2.46271	3.04343	179.6	133.5	154.8	115.4	124	133.7	103.9	110.4	381.2	365	276.6	413.7
1434479_at	Col5a1	AV246911	0.124766	1.02519e-07	5.0562e-08	1.08378	3.29622	3.0414	1951	1606.8	1904.3	1739.7	2001.1	1956.8	1983.5	1863.8	5610.3	6096	5921.3	6111.1
1415780_a_at	Armcx2	NM_026139	0.128379	2.31464e-05	5.81846e-07	0.813201	2.47314	3.04125	235.1	194.4	298.2	199.5	196.5	173	187.5	197	535.4	562.7	580.4	614.6
1443937_at	---	BE634648	0.0383336	5.19889e-05	7.37764e-06	0.729842	2.21779	3.03872	31.6	36.5	26.2	26	23	24.6	23.5	16.7	62.7	72.1	70.1	61.9
1416528_at	Sh3bgrl3	NM_080559	0.421492	3.69751e-06	1.87503e-06	0.952911	2.89554	3.03862	1605.1	1316	1683.4	1560.4	1551.4	1428.1	1456.9	1438.2	4014	4504.2	4532.9	4799.6
1423311_s_at	Tpbg	BQ177165	0.600608	7.43468e-05	5.34769e-05	0.958054	2.9104	3.03783	67.7	77.2	87.1	66	73	78.6	65.3	68.6	177.2	239.2	216.8	234.1
1418665_at	Impa2	NM_053261	0.0047733	0.000782097	0.00235215	2.51729	7.64661	3.03764	4.4	14	33.7	26	50.5	54.4	46.5	45.2	106.9	128.2	166.5	195.6
1421817_at	Gsr	AK019177	0.526964	1.30692e-05	1.99216e-05	0.933525	2.83507	3.03695	296.8	247.8	304.9	260.7	328.5	228.1	251.3	228.5	829.1	831.8	677.4	809.2
1443106_at	4930562C15Rik	AV262313	0.623338	0.00130216	0.00293672	1.36429	4.14286	3.03665	0.9	3.5	8.3	1.3	1.3	9	6.4	2.4	12.3	14.4	14.4	16.9
1434763_at	Orai2	BF457736	0.356119	0.000761874	0.000194353	0.842583	2.55853	3.03653	67.1	36	40.2	54.9	37	51.2	39.1	39.7	125.4	120.4	106.8	154.5
1416875_at	Parvg	NM_022321	0.617628	9.7169e-05	0.000111999	1.04454	3.16924	3.03411	48.7	42.7	37.8	39.2	50.8	39.9	39.9	45.3	142.2	146.1	104.5	140.9
1421031_a_at	2310016C08Rik	NM_023516	0.447318	2.07907e-05	2.24875e-05	0.908715	2.75582	3.03266	75.6	55.4	62.7	72.5	61.1	70.3	66.7	43.8	157.7	189.4	193	193.5
1425885_a_at	Kcnab2	L48983	0.660026	0.00433586	0.000513184	0.842365	2.55419	3.03216	4.3	5.7	15.8	14.8	6.5	9.1	5.4	13.2	28.9	29.5	22.3	23
1434920_a_at	Evl	AW553781	0.390794	0.000106508	6.54194e-05	0.93168	2.8239	3.03098	181.1	158.4	201.2	148.7	165	164.3	146.1	166.9	455.5	525.7	410.3	555.3
1442114_at	Gpn1	AI449615	0.12113	0.000516571	0.00121631	0.664062	2.01042	3.02745	19.9	17.8	18.6	20.5	10.9	6.1	11.3	22.7	37.7	34.9	35	46.8
1429171_a_at	Ncapg	BB702347	0.1151	0.000230374	0.000558784	1.5445	4.67365	3.02599	15.8	21.8	11.9	7.8	20.2	15.7	22.5	30.1	53.2	62.1	81.3	71.2
1448786_at	LOC100045163 /// Plbd1	NM_025806	0.555529	5.40772e-06	6.9223e-05	1.12051	3.38974	3.02517	229.3	223.9	183.5	182.3	235.4	178.9	170.3	333.1	738.5	751.5	631.3	654.9
1451344_at	Tmem119	BC025600	0.441243	2.69586e-05	3.78844e-05	1.05003	3.17638	3.02505	710.7	656.4	719.3	670.2	802.1	735.6	740.8	616	1817.2	2255.7	2255.7	2427.4
1440011_at	---	AV228877	0.270419	0.000712222	0.000415934	0.881751	2.66646	3.02405	216.5	198.1	231.9	155.2	172.4	192.5	192.7	149.3	415	637.4	493.4	591.9
1436000_a_at	Skp2	BB055741	0.91779	0.000213752	0.000177536	1.01866	3.07859	3.02218	23.2	17.1	28.8	32.7	30.8	27.7	27.4	17.8	86.3	80.7	61.5	84.9
1429178_at	Odz3	BB472509	0.173089	0.000184303	0.00015472	0.930691	2.81248	3.02192	155.1	145.9	138.2	153.8	149.7	131.8	144	126.4	341.1	458.7	385	483
1451038_at	Apln	BB819942	0.237082	1.35516e-06	1.13631e-06	0.917912	2.77334	3.02136	114.1	99.2	101.3	93.5	90	107.6	88.7	88.3	284.8	286.6	259.9	300.5
1450509_at	Chst11	NM_021439	0.0143062	0.00128661	0.000258481	0.67686	2.04485	3.02108	29.7	21.2	23.5	23.7	20.2	13.1	16.5	16.6	47.1	41.1	51.7	60.7
1451230_a_at	Wbp5	BC007478	0.0701337	2.34742e-06	3.12333e-06	1.09706	3.31234	3.01928	1850.9	1625.3	1830	1823.3	2017.1	1884.1	2086.6	1833.7	5236.4	6284	6126.1	5968.8
1419589_at	Cd93	BB039247	0.508348	4.57591e-05	3.68285e-05	1.05711	3.19107	3.01866	629.5	529.8	619.7	446.4	623.5	592.7	580	556.3	1531	1849.1	1684.1	2037.2
1428636_at	Steap2	AK015015	0.109469	4.52097e-07	4.20827e-08	0.872749	2.63388	3.01791	121.7	107.4	140.8	135.4	111.8	98.2	117.1	113.9	344.6	322	327.4	336.9
1455893_at	Rspo2	BG067392	0.00104949	0.00109466	3.94154e-05	0.575251	1.73568	3.01725	497.9	394	546.5	516.4	279.8	287.4	307.1	250.2	708.8	938.5	832.4	913.2
1460258_at	Lect1	NM_010701	0.282725	0.0408076	0.00786005	0.702703	2.11952	3.01624	24.9	42.9	69.7	29	22.5	36	29.5	29	58.5	67.3	109.7	117.4
1426970_a_at	Cdh29 /// Uba7	AK004894	0.391074	2.81211e-05	8.4728e-06	0.894662	2.69804	3.01571	139	171.7	145.6	105.7	142.6	137.4	107.3	115.5	355.4	390.9	350.9	419.1
1448158_at	Sdc1	BI788645	0.48278	0.000274409	0.000551941	1.10775	3.33919	3.01438	111.4	117.5	96.6	101.4	95.7	141.4	90.3	145.5	299.4	302	398.8	425.3
1429233_at	2012-09-11	BM120495	0.261456	2.19666e-06	4.41949e-07	0.911913	2.74871	3.01422	496.8	378.6	471	396.2	426.4	391	402.5	369.2	1134.9	1266.5	1148.9	1239.6
1447040_at	---	AU041266	0.68103	0.00158413	0.000503993	0.867241	2.61379	3.01392	18.4	14.5	4.7	20.4	19.5	13.2	11.6	6	45.2	36.6	35.9	33.9
1441663_at	---	BB372972	0.144123	5.3926e-05	3.52059e-05	0.838398	2.52624	3.01318	58.8	53.7	59.9	44.8	43.3	55.5	36.6	46.7	127.9	134.1	127.7	159
1424459_at	Lpcat1	BG068664	0.279413	8.69188e-05	4.47653e-05	0.900555	2.71322	3.01283	489.3	347.3	472.1	421.9	427.7	378.8	404.4	347.6	971.1	1164.8	1268.6	1291
1415951_at	Fkbp10	NM_010221	0.197768	4.77981e-05	2.96349e-05	0.91862	2.76561	3.01062	684.7	615.9	790.6	708	665	662.4	646.9	597.1	1671.9	1877.9	1970.4	2221.3
1453586_at	Entpd1	AV117919	0.229393	3.3806e-05	1.82248e-05	0.880709	2.64922	3.00805	174.4	181	204.4	145.2	176.7	150.4	163.6	130.2	445.2	529.8	420.4	472.3
1444257_at	Prr11	BB208466	0.451293	3.38328e-05	0.00258825	1.45581	4.37907	3.00799	6.9	13.9	7.9	14.3	30.7	16.6	12.3	3	48.2	39.7	52.5	47.9
1447046_at	Ucp2	BM238032	0.0342417	0.0385262	0.00126363	0.524617	1.57789	3.00769	87.3	56.1	60.8	43.6	33.4	47.9	26.8	21.9	96	103.8	119.5	71.7
1447364_x_at	Myo1b	AA406997	0.323078	0.0020818	0.00151136	0.857904	2.58016	3.00751	103.4	93.2	91	69.2	61.1	83.2	61.9	99.9	213	222.5	180.7	304.4
1460253_at	Cmtm7	NM_133978	0.606423	5.31269e-06	5.12342e-06	0.964623	2.89925	3.00558	339.4	275.3	298.5	313.6	318.6	276.7	323.4	264.7	854.4	882.2	827.8	992.4
1437251_at	Cdca2	BG065056	0.283678	0.00044114	0.000708019	1.16277	3.49416	3.00503	34.1	32.1	22.8	30.8	40.9	32	26.8	39.6	94.3	91.1	97.4	135.8
1427515_at	Pion	BB637972	0.0640532	1.80552e-05	1.81798e-05	0.857335	2.57603	3.00469	53.1	58.5	56.2	55.8	51.2	53.6	38.4	48.5	123.7	147.2	148.2	156.9
1440595_at	Epb4.1l3	BB036542	0.195194	0.00168264	0.0011952	0.833223	2.50165	3.00237	37.2	43.9	37.4	33.2	41.3	24.5	33.4	27.2	105.9	118	73.2	82.4
1428972_at	Tctex1d2	AK007178	0.0327981	0.00286618	0.00159676	0.8187	2.45667	3.0007	40.5	49.4	41.4	44.1	38.6	31.3	40.1	33.6	96.4	103	86.1	145.4
1419061_at	Rhod	D89821	0.337386	6.98305e-06	1.16193e-05	1.17699	3.53165	3.00058	41.4	34.5	45.4	25.6	40.3	46.9	32.4	53.3	116.3	138.8	132.8	130.9
1457747_at	9330109K16Rik	BB180676	0.355918	0.00245234	0.00131073	0.888889	2.66667	3	0.2	0.2	0.3	0.2	0.2	0.2	0.2	0.2	0.8	0.6	0.5	0.5
1416985_at	Sirpa	AB018194	0.0127327	3.44599e-06	6.26382e-07	0.799184	2.39712	2.99946	1006	786.1	953.6	929.8	754.6	737.7	777.3	667.8	2305.8	2280.1	2024.8	2199.9
1438020_at	Hapln1	BB036951	0.02357	0.00978457	0.00480615	0.782441	2.34593	2.99821	60.3	77.6	77.9	70.1	53.6	63	48.7	58.4	103.9	150.7	198.6	217.5
1438877_at	Trpm6	BM213868	0.221003	0.000647219	0.000106779	0.794497	2.38177	2.99784	63.7	34.7	69.3	64.9	53.4	51.9	39.2	40.3	117.6	162.8	131	142.6
1439902_at	C5ar1	BB552085	0.85231	0.000763181	0.000419598	1.03433	3.0999	2.997	155.5	76.8	101.3	85.8	103.4	108	124.4	98	413	312	274.5	300.6
1418773_at	Fads3	BE652876	0.123943	2.25703e-05	1.08622e-05	0.838122	2.51127	2.99631	238.2	207.5	263.1	196.2	206.3	218.7	159.4	174.1	527.4	523.5	615.4	606.4
1418194_at	Galnt10	BG965198	0.520485	7.22505e-07	2.58236e-06	1.06829	3.19899	2.99451	59	64	51.3	64.4	65.4	76.9	60.3	52.4	185.5	202.2	178.6	197.3
1418719_at	Haus8	NM_029621	0.106687	8.93873e-05	7.06705e-06	0.742468	2.22319	2.99433	69.1	87.3	57	95.3	70.6	52.5	43.6	62.5	186.3	172.6	164.3	163.1
1421295_at	Chrdl1	NM_031258	0.781839	0.000171905	0.000154794	1.03552	3.1003	2.99395	93.6	92	90.4	59	87.7	101.8	85.3	72.1	266.7	273.9	203.4	294.6
1420915_at	Stat1	AW214029	0.101671	0.000115907	4.28554e-05	0.840292	2.51545	2.99354	115.1	140.8	124.6	98.5	102.7	112.1	91.7	96	308.5	303.5	251.7	341.2
1433543_at	Anln	BI690018	0.112396	3.53516e-05	0.000128494	1.32881	3.97722	2.99307	103.3	105.1	81.9	122.4	136.4	117.1	111.7	183.2	364.6	389.2	399.5	488.1
1438552_x_at	Zyx	BB759260	0.990572	0.00500965	0.00492541	1.00194	2.9987	2.99289	92.6	92.1	66.6	57.5	75.3	97.1	80.1	56.9	129.3	274.7	273.9	248.1
1425094_a_at	Lhx6	AB031040	0.902282	5.63317e-05	4.10629e-05	0.989583	2.95908	2.99023	40.7	30.5	30.8	32.4	36.1	33.8	33.3	29.8	85.9	93.4	113.4	105
1455773_at	---	BG797225	0.00240949	0.00025755	3.70336e-05	0.694263	2.07508	2.98889	337.4	270.7	309.9	262.1	205.9	206.6	194	212.8	714.3	547.4	621.2	565.9
1434940_x_at	Rgs19	BB233670	0.0134046	0.000552526	0.000191524	0.753333	2.25	2.98673	97.9	98.8	84.2	79.1	77.8	64.4	70.3	58.7	193.7	167.6	203.4	245.3
1443641_at	Fermt3	BF318304	0.427187	1.47509e-05	2.02505e-05	1.09727	3.27708	2.98657	33	26.9	39.2	36.6	37.3	38.1	43.6	29.9	121	118.9	97.4	107.4
1435945_a_at	Kcnn4	BG865910	0.00408795	0.00091441	7.35963e-05	0.625792	1.8686	2.98598	254.2	209.6	300.9	261.2	173.6	145.5	182.1	140.8	429.8	425.4	556.7	505.1
1417431_a_at	Sphk2	AF245448	0.37077	0.000217559	8.28458e-06	0.843313	2.51672	2.98432	131.5	86.8	119.7	62.8	74.2	80.9	89.5	93.4	241.2	226.9	276.7	263.9
1456861_at	Gm14005	BB830168	0.335044	0.113414	0.00337414	0.572727	1.70909	2.98413	28	7.2	7.4	12.4	10	14	6.3	1.2	19	28.4	23.3	23.3
1458642_at	Klre1	BG230222	0.159565	0.539659	0.00971978	0.422705	1.26087	2.98286	9.1	20.2	3	9.1	6.3	5.2	4.4	1.6	10.7	18.8	9.3	13.4
1417730_at	Ext1	NM_010162	0.780646	5.7098e-06	6.56686e-06	1.01726	3.03396	2.98248	441.2	369.1	390.2	392.6	398.9	421.7	442	358	1106.5	1165.5	1210.3	1351.1
1426958_at	Rps9	AK013903	0.572631	0.00157194	0.000946607	0.927736	2.76692	2.98244	79.1	54.5	58.6	47.2	61.5	56.9	53.5	50.2	147.2	182.3	125.7	207.2
1435144_at	---	BM243379	0.39937	5.11983e-06	8.07421e-06	0.919295	2.74128	2.98193	150.9	145.7	166.3	133.1	149.7	127.8	160.6	109.8	429.9	440.2	386.7	377
1423904_a_at	Pvr	BB049138	0.0960805	0.000142826	3.35841e-06	0.735883	2.19407	2.98154	153.4	121.5	180.7	104	123.6	102.5	100.2	85.5	311.2	332.4	295.8	288.4
1421217_a_at	Lgals9	NM_010708	0.1058	6.92055e-05	5.82087e-05	0.911226	2.71629	2.98092	292.9	316.7	299.1	287.6	273.7	271.7	302.8	241.9	806.1	868.9	667.5	907
1455451_at	Kctd14	AW552116	0.0308517	0.00284924	0.00131649	0.781302	2.32888	2.98077	13.8	16.3	16.5	13.3	10.6	11.4	14.1	10.7	25.7	30.8	43.1	39.9
1415800_at	Gja1	M63801	0.31531	1.07543e-05	6.46629e-06	0.936396	2.7911	2.98069	1850.5	1505	1685.8	1505.5	1470.9	1594.1	1437.6	1627.8	4774	4044.7	4476.2	4977.9
1437401_at	Igf1	BG075165	0.388806	3.37986e-07	1.41305e-07	1.06391	3.17102	2.98054	1764.8	2272.6	2244.5	1937.8	2298.2	2274.1	2182.4	1990.3	6788.9	6678.1	6164.6	6433.2
1427141_at	2700099C18Rik	BC002320	0.803876	0.000818497	0.00109075	1.08511	3.23404	2.98039	4.1	11.6	6	6.5	8.8	11.8	5.6	4.4	17	24.6	23.8	25.8
1418652_at	Cxcl9	NM_008599	0.096438	0.00143504	0.00405127	1.87664	5.59065	2.97908	16.7	22.7	2.6	11.5	33.2	30	22.7	14.5	58.1	58.2	83	99.8
1422441_x_at	Cdk4	NM_009870	0.607313	4.0567e-06	4.22669e-06	1.01959	3.03667	2.97834	446.4	403.3	419.6	451.4	468.3	418.1	435.8	432.2	1150.6	1340.3	1331.9	1402.4
1419005_at	Crybb3	NM_021352	0.194553	0.662355	0.00341554	0.397887	1.18486	2.97788	59.7	20.9	7.8	25.2	6	10.3	22.4	6.5	30.4	30.2	31.8	42.2
1426095_a_at	Tnfrsf22	AY046551	0.0965597	0.000170174	0.00014416	0.845909	2.5186	2.97739	72.7	65.6	70.4	73.6	60.7	73.3	56.6	48.2	148.6	192.9	164.7	204.8
1426883_at	Slc25a45	AV300228	0.278351	6.99082e-06	7.31032e-07	0.892495	2.65704	2.9771	175.1	131.8	190.4	143.6	149	145.8	148.8	128.4	457.7	428.5	418.9	397.8
1416013_at	Pld3	NM_011116	0.359027	4.79243e-06	2.23775e-06	0.932185	2.77445	2.97628	606.9	535.1	712.2	624.6	543.1	626.6	539.7	601.3	1575.1	1794.6	1662.5	1845.1
1416410_at	Pafah1b3	NM_008776	0.274411	0.00101203	0.000612548	0.892254	2.65513	2.97575	59.8	69.2	55	47.1	52.7	53.8	44.7	55	114.6	143.3	182.6	173.1
1460188_at	Ptpn6	NM_013545	0.0420469	1.09189e-06	7.40862e-07	0.868478	2.58324	2.97445	173.1	176.6	195	198.9	155	181.7	158.6	150.5	498.1	507.3	450.7	464.8
1455123_at	St18	BB178719	0.452809	8.75737e-06	0.000247418	1.26939	3.77551	2.97428	8.8	4.8	6.1	4.8	8.3	12.4	3.6	6.8	21.2	22.7	23.7	24.9
1448050_s_at	Map4k4	BF450398	0.176743	2.00712e-06	5.72145e-07	1.20837	3.59398	2.97424	195.5	116.6	202.7	156.6	210.2	228.5	174.6	198	573.3	590.7	609.1	639.9
1416492_at	Ccne1	NM_007633	0.358417	6.93465e-05	0.000285488	1.29236	3.84248	2.97322	12.4	21.2	20.4	29.8	30.7	31	12.2	34.4	71.9	75.8	79.5	94.8
1451567_a_at	Ifi203	BC008167	0.997292	0.000865307	0.00110059	0.999413	2.97067	2.97242	31.4	49.6	42.9	46.6	45.2	57.7	30.8	36.7	130.9	114.2	100.2	161.2
1416746_at	H2afx	NM_010436	0.254483	4.04163e-05	7.46091e-05	1.10901	3.29613	2.97214	210.9	207.3	199.9	184.6	230.7	193.9	200.3	265.3	563.4	621.5	704.7	756.2
1439695_a_at	Kif20b	BB200034	0.895802	0.000817984	0.000849976	1.0135	3.01215	2.97202	33	39	32.7	43.4	37.7	38.1	30.8	43.5	78.3	114.3	120.3	133.2
1438750_at	Atrx	BB425841	0.26568	0.000386278	0.000216583	0.871045	2.58866	2.9719	46.2	48.8	38.9	33.6	41.3	34.7	40.3	29.6	116	124.2	84	109.4
1449859_at	Golt1b	NM_025872	0.951391	5.38691e-06	1.50779e-06	0.994898	2.95475	2.9699	130.4	88.4	113.6	118.4	117.7	111.3	108.7	110.8	302	329	354.9	346.1
1451105_at	Vash2	BC024141	0.36963	0.000115571	0.000124792	1.06721	3.16836	2.96883	30.9	40.8	39.1	36.5	40.3	42	39.3	35.6	95.1	135.5	111.1	125
1456319_at	---	BG065719	0.68825	9.15583e-05	7.9274e-05	1.08669	3.22303	2.96591	247.8	205.4	210	106.2	254.8	135.9	220.6	224.8	583.9	681.9	675.3	538.7
1435448_at	Bcl2l11	BM120925	0.0789612	1.27996e-06	1.2063e-06	0.888964	2.63535	2.96452	273.7	240.7	268.3	247.6	240.7	234.9	243.7	196.6	686.4	721.8	623.4	683.6
1416798_a_at	Nme4	NM_019731	0.0934096	9.16248e-06	4.89044e-06	1.40383	4.16113	2.96413	15	24.3	23.8	36.2	27.7	35.2	39.3	37.2	93.3	102.9	110.6	106.4
1428902_at	Chst11	AK003880	0.0673648	9.95512e-06	1.98054e-06	0.853169	2.52803	2.9631	232.5	233.7	267.1	194.3	198.7	203.6	201.2	187.9	587.2	528.8	596.7	632.3
1425761_a_at	Nfatc1	AF239169	0.0620776	0.00117488	0.000310901	0.775437	2.29749	2.96283	285.9	225	224.5	180.6	179.8	192.6	163.3	174.6	433.1	458.7	601.4	611.3
1440023_at	Pcdh12	BB366630	0.481882	0.000119173	0.00714966	1.59627	4.72671	2.96109	3.6	2.8	7.7	2	7.7	2.5	14.2	1.3	19.9	15.8	19.3	21.1
1423135_at	Thy1	AV028402	0.00889334	4.137e-05	2.86026e-05	0.891012	2.63779	2.96045	720.8	672.9	673.2	722.4	651.8	628.3	621.9	583.3	1673.1	2152.9	1768.2	1763.4
1437783_x_at	Cnpy2	BM570679	0.273019	1.6348e-07	2.56697e-07	0.947848	2.80579	2.96017	915.5	841.1	922	897.5	882.7	873.6	887.5	745.8	2395.4	2579.6	2430.6	2628.2
1434762_at	Orai2	BF457736	0.0963163	0.00300675	0.000438639	0.703704	2.08289	2.9599	41.8	57.7	76.7	50.6	42.5	42.4	27.7	47	100.7	135.5	99.4	136.8
1440866_at	Eif2ak2	AV328340	0.10934	0.00216501	0.00065278	0.771127	2.28239	2.95982	30.7	44.1	39.4	27.8	21.5	31.4	27.8	28.8	75.6	85.4	62.5	100.6
1427040_at	Mdfic	U13371	0.484066	6.42629e-06	7.80498e-06	1.03977	3.07708	2.9594	606.7	536.7	621.2	561.5	667.6	562.7	572	616.3	1805.6	1726.7	1622.9	2002.4
1433963_a_at	Fermt3	BG066664	0.0448234	9.36748e-05	3.85814e-05	0.818596	2.42183	2.95851	118	124.2	137.3	103.4	98	112.3	87.8	97.2	258	309	269.8	332.7
1452249_at	Prickle1	BC022643	0.410856	0.000110178	9.3346e-05	0.949645	2.80942	2.95839	207.5	204.4	229.9	188.3	211.5	206	174.5	196.3	642.1	632.9	593.5	463.6
1456778_at	---	BB409477	0.0553623	0.000744016	0.000118607	0.75702	2.23843	2.95689	788.9	510.7	646.1	536.4	464.4	485.2	461.5	467.9	1123.6	1495.1	1334.7	1602.6
1422114_at	Erf	NM_010155	0.0351412	0.89919	0.00610503	0.326087	0.963768	2.95556	4.9	1.2	3.3	4.4	1.1	1	0.6	1.8	3.1	2.1	4.2	3.9
1434789_at	Depdc1b	BB136172	0.307154	0.000130052	0.000615233	1.32182	3.90581	2.95487	11.1	19.4	13.2	20	33.1	16.8	17	17.3	58.6	56.8	56.7	76.7
1416696_at	D17Wsu104e	NM_080837	0.589555	3.78816e-06	4.80542e-06	0.96956	2.86472	2.95466	316	293.2	299.4	326.6	333.1	304.8	297.7	262	810.7	840.9	960	926.9
1428176_at	S1pr2	AK003144	0.105017	3.77827e-05	4.65204e-06	0.785465	2.32077	2.95465	162.1	127.1	197.1	145.3	143.3	120.6	98.6	133.6	337.9	382.6	391.1	354.2
1438945_x_at	Gja1	BB142324	0.0287161	2.1708e-06	1.16458e-06	0.850353	2.51085	2.95271	1256.8	1122.1	1177.1	1049.5	917.2	1037.4	899.5	1062.2	2828.1	2668.2	3026.6	3040.8
1451819_at	Zswim6	BC021311	0.0727415	0.00022091	0.00010269	0.860619	2.54109	2.95263	91.6	74.3	81.7	68.8	69.8	66.3	70.4	65.8	181.8	220	170.7	231.5
1422513_at	Ccnf	NM_007634	0.395378	1.62788e-05	0.000211181	1.31695	3.88666	2.95126	23.8	16.7	21.1	38.1	30.6	15.6	34	51.1	88.6	95.3	98.4	105.2
1416382_at	Ctsc	NM_009982	0.0559	6.21538e-05	3.71623e-05	0.866765	2.55372	2.94627	1653	1960.5	1799.5	1645.2	1593.2	1608.3	1584.3	1332	4485	4828.2	3760.4	4951.1
1422138_at	Plau	NM_008873	0.618059	0.00136481	0.000660909	1.1875	3.49688	2.94474	12.1	7.5	1.1	11.3	12.2	6.6	11.4	7.8	28.4	25.1	23.5	34.9
1419744_at	H2-DMb2	NM_010388	0.00486053	0.0274964	0.00205188	0.500801	1.47436	2.944	35.1	27.7	30.7	31.3	12.7	10.5	25.1	14.2	34.1	51.7	42.3	55.9
1455050_at	E130203B14Rik	BB304844	0.383427	5.79286e-05	6.03946e-05	1.03776	3.05514	2.94397	121.7	130.1	134.4	114.3	133.9	133.7	125.2	126.6	341.4	440.6	338.4	408.7
1444566_at	Ucp2	BE690613	0.0644551	5.84955e-05	0.000249449	0.643327	1.89288	2.94233	47.2	42.5	35.5	41.9	24.7	20.9	44.7	17.2	74.2	80.2	86.7	75.2
1439852_at	---	BB036443	0.179585	7.01387e-07	1.50325e-07	1.1148	3.27905	2.94139	148.7	130.1	103.9	120.8	136.2	139.3	141	144.8	397	409.3	440.9	403.8
1430190_at	Ccdc30	AK006668	0.935127	0.000221566	0.000341667	0.98294	2.89108	2.94126	13.3	19.3	24.6	19	13.8	18.1	27.5	15.5	55.2	65.3	46.1	53.7
1421188_at	Ccr2	BB148128	0.0261588	4.23633e-05	2.31975e-06	0.73822	2.16998	2.93948	63.1	85.6	77	60.8	55.4	52.5	57.6	46	165.7	142.3	151.4	162.3
1426239_s_at	Arrb2	BC016642	0.605975	6.56388e-06	4.75968e-06	0.954976	2.80702	2.93936	351.5	277.1	371.1	319.6	368	305.2	297.7	289	1011.5	949.6	847.3	894.9
1417786_a_at	Rgs19	BC003838	0.137468	1.99565e-06	4.58613e-07	0.877125	2.57638	2.9373	206	170.8	209.9	166.1	164.8	166.1	182.1	147.3	468.5	486.6	466.1	518.3
1427931_s_at	Pdxk	BG063905	0.59699	0.00268387	0.00170244	0.935484	2.7477	2.93719	15.1	27.2	21.9	22.6	19.9	20.6	20.9	19.8	44.2	79.3	55.6	59.4
1443686_at	H2-DMb2	BB734586	0.00212003	0.0137778	0.000610763	0.526468	1.54605	2.93664	79.5	70.5	56.6	69.2	24.2	36.7	41.3	43	87	124.1	92.2	123.1
1423648_at	Pdia6	BC006865	0.36723	5.40041e-07	1.3389e-07	0.925366	2.7164	2.93549	953.2	728.2	929.3	803.3	899.4	780.8	748.6	730.4	2254.2	2373.3	2397.2	2249.1
1450786_x_at	Pdlim5	NM_019808	0.205445	0.000275747	0.000239669	0.829252	2.43367	2.93478	167.5	131.5	131.9	157.1	93.8	161.5	103.2	129.1	318.8	370.9	314.6	426.7
1449109_at	Socs2	NM_007706	0.569341	2.81294e-05	2.69584e-06	0.920742	2.7015	2.93405	922.6	652.3	706	518.8	698.7	584.9	720.5	573.7	1839.3	1868.6	1783.3	2072.2
1423267_s_at	Itga5	BB493533	0.783857	0.000102055	1.38961e-05	0.959923	2.81614	2.93372	227.9	120.2	217.7	160.3	172.2	177.7	169.7	177.4	479.6	531.3	458.7	575.2
1435375_at	Fam105a	BM224662	0.893425	2.62714e-05	6.20052e-06	0.984018	2.88577	2.93264	148.3	160.4	205.9	123.6	172.7	151.3	159	145	494.6	489.7	410.8	446.6
1452531_at	Runx1	X97306	0.00416238	2.34447e-05	4.92537e-06	0.759382	2.22689	2.9325	131.9	106.7	117.9	109.8	89.8	84.6	95.7	84	254.6	284.7	232.9	266.2
1421061_at	Guca1a	NM_008189	0.286349	0.00603792	0.00414098	0.838806	2.45896	2.93149	35.6	32.4	39.3	26.7	33.2	16.9	31.3	31	115.9	69.3	78.4	65.9
1417790_at	Dok1	BC013066	0.0739218	0.000494016	0.000176616	0.82678	2.42222	2.92971	279	196.2	271.9	232	199.6	193.6	203.9	212.4	494.4	532.4	650.2	694.6
1418440_at	Col8a1	NM_007739	0.513025	8.55595e-05	1.13248e-05	1.13727	3.33101	2.92896	321	162.3	182.7	152.1	234.1	255.1	210.4	230.8	608.3	644.6	740.2	732
1437056_x_at	Crispld2	BB558800	0.18099	4.74831e-06	1.14837e-05	1.18981	3.48437	2.9285	931.4	1191.3	1366	1201.7	1738.4	1309.7	1313.8	1218.8	4024.8	3820.3	4569.5	3928.5
1447633_x_at	---	AV121537	0.0424893	0.456636	0.00845315	0.41453	1.21368	2.92784	7.4	8.3	4.2	3.5	1.4	3.3	1.3	3.7	7.6	5.1	5.9	9.8
1434684_at	Rin3	AV338855	0.0702388	0.000124404	5.86917e-05	0.839514	2.45778	2.92762	91.9	68.9	79.7	80.4	73.4	73	59.3	63.7	220.7	189.7	165.2	213.1
1430291_at	Dock5	AK004325	0.437734	3.47108e-06	2.35776e-06	0.928	2.71631	2.92706	90.6	89.4	74.9	70.1	82.5	82.5	62.2	74.4	202	228.5	233.1	219.2
1425788_a_at	Echdc2	BC025104	0.131832	2.61401e-05	1.94751e-05	0.851747	2.49267	2.92654	42	51.2	43.6	40.6	33	32.7	44.5	40.9	102.2	100.8	118.4	120.8
1439523_at	Bend4	AA821862	0.850843	0.00244882	0.000503174	1.06469	3.11513	2.92585	41.6	8.5	15.9	25.2	28.6	28	19.5	21	61.4	70.2	62.9	89.6
1435349_at	Nrp2	BB752129	0.278551	0.000167986	6.74815e-05	0.887031	2.59511	2.92561	544.3	388.8	539.4	411.2	454.4	439.7	387.3	389.5	1032.1	1143.6	1350.7	1362
1426165_a_at	Casp3	D86352	0.319844	1.08874e-05	8.54833e-06	0.940695	2.75174	2.92522	62.4	55.3	67.1	59.7	60	62.5	54.6	52.9	151.6	188.5	165.1	167.6
1453228_at	Stx11	AK017897	0.0141446	0.00126803	0.000489585	0.729615	2.13385	2.92462	67.2	61.1	71.6	60.1	57.4	44	37.2	51.1	106.7	168.6	138.5	141
1425797_a_at	Sykb	U36776	0.198641	7.35987e-05	1.73268e-05	0.810208	2.36952	2.92458	35.1	29.4	44.9	29.7	22.9	33.8	32.1	23.9	73.3	89.4	85	81.9
1426278_at	Ifi27l2a	AY090098	0.00294154	0.0190632	0.00507088	0.663276	1.93904	2.92344	608.7	568.1	579	691.9	499.3	398.7	359.3	366.2	1638.7	1210.5	1127.3	769.7
1417703_at	Pvrl2	NM_008990	0.52031	0.000172965	7.49163e-06	0.888471	2.59586	2.92172	49.1	40.5	48.1	21.9	36.5	34.7	31.3	39.3	96.2	116.6	101.4	100.1
1451629_at	Lbh	BC026827	0.0519078	9.99342e-05	1.54416e-05	0.75	2.19081	2.92107	46.3	30.8	43.5	38.2	35	32.1	26.8	25.2	86	77.7	87.3	96.9
1426260_a_at	Ugt1a1 /// Ugt1a10 /// Ugt1a2 /// Ugt1a5 /// Ugt1a	D87867	0.069708	6.658e-07	7.43091e-07	1.14686	3.34891	2.92006	659.9	592.8	728	583.6	765.3	696.6	685.1	793.9	2040.1	2320.9	2085.6	2141
1455288_at	1110036O03Rik	BE951265	0.27177	0.000100318	4.95584e-05	0.910094	2.65552	2.91785	437	344.7	489.6	432.7	394.8	406.6	359.6	389.8	965.7	1081.2	1304.1	1174
1431875_a_at	E2f1	AK017841	0.0928758	0.000141149	0.000124953	0.870734	2.53981	2.91686	72.2	73.4	73.5	71	71.5	65.6	65.7	49.8	149.4	182.9	211.8	192.7
1434413_at	Igf1	BG092677	0.108118	1.38022e-05	1.53265e-05	1.14696	3.34501	2.91641	1574.9	2129.2	2048.2	1783.8	2299.6	2231	2155.9	1957.1	6026.7	7010.2	5556.4	6615
1418304_at	Cdhr1	NM_130878	0.893811	1.52648e-05	0.00100526	0.959391	2.79695	2.91534	5.6	4.1	5.4	4.6	8.3	1.5	4.4	4.7	13	15.4	12.7	14
1422706_at	Pmepa1	AV370981	0.10314	1.55524e-05	1.96857e-08	0.804618	2.34573	2.91533	830.8	554.6	892.9	701.5	586.5	601.9	630	579.2	1735.6	1719.9	1827.7	1706.6
1450456_at	Il21r	AB049137	0.103378	0.00653447	0.00116857	0.714184	2.08197	2.91517	41.9	44.5	28.3	25.6	26.1	25.8	29.3	19	86.4	72.4	50.7	82.6
1442336_at	---	BE334274	0.954863	0.00825422	0.0085338	0.99548	2.90156	2.91473	50.5	52.7	48.4	47.5	39.8	49.1	57	52.3	192.6	180	96.9	108.2
1425801_x_at	Cotl1	BC011068	0.0137323	1.79415e-06	4.37522e-07	0.845808	2.46512	2.91451	365.6	354.8	428.3	386.4	341	315.8	322.8	318.8	953.5	943.5	879.3	1007.9
1448531_at	Lmnb2	NM_010722	0.0816945	0.00129833	0.000602289	0.767215	2.23583	2.91422	44.7	33.7	46.4	39.3	36.3	24.1	26.8	38.7	91.8	68.1	107.1	99.9
1442063_at	Adamtsl1	AV380797	0.0786436	0.000151661	0.000185481	1.15374	3.3606	2.9128	51.2	48.1	64.3	49.1	59.1	63.2	62	61.1	210.5	177.8	140.9	185.6
1417869_s_at	Ctsz	NM_022325	0.367813	3.84139e-05	3.24912e-05	0.939139	2.7351	2.91235	736.5	602	699.6	707.5	667.6	671.1	688.4	551.4	1699.4	1833.8	1789.3	2187
1458374_at	C79407	BB540053	0.200293	7.25142e-05	0.000163893	1.20944	3.52114	2.91138	24.9	24.8	21.1	30.9	31.8	26.2	25.9	39.1	73.4	88	92.6	104.1
1449347_a_at	Xlr4a /// Xlr4b /// Xlr4c	NM_021365	0.283264	0.000331481	0.00033047	0.881319	2.56579	2.91131	71.2	75.5	62.5	69.7	56.6	46.3	76.5	66.4	211.5	159.3	149.5	195.3
1424652_at	Fam176a	BC027150	0.393443	0.00486202	0.00290502	0.762615	2.22018	2.91128	30.9	20.4	22.5	13.4	25.8	18.9	5	16.8	42.7	38.9	50.7	61.3
1439191_at	---	BB540658	0.0140879	0.00201469	1.67651e-05	0.600934	1.74744	2.90788	633.7	459	705.6	450.7	367.9	348.5	339.4	295.7	883.7	1109	927	1010.3
1454742_at	Rasgef1b	BB003229	0.000669734	0.0035428	0.000204008	0.558726	1.62442	2.90736	74.6	73.9	85.6	67.3	34.2	45.2	38.8	50.2	96.8	121.8	129.9	141.1
1420028_s_at	LOC100045677 /// Mcm3	C80350	0.380438	1.25483e-05	2.39632e-05	1.07999	3.13971	2.90717	152.9	127.4	136.6	140.7	150.1	137.6	134.1	180.4	381.9	423.8	482.9	462.1
1441776_at	Tspan11	BB732603	0.70127	0.000220052	0.000219508	1.06232	3.08794	2.9068	54.9	32.2	47.4	37.2	36.2	56.3	42.2	47.7	106	153.3	142	128.9
1450988_at	Lgr5	BB751088	0.885329	0.00032803	0.000427739	1.02028	2.96466	2.90574	49.3	46.6	43	33.7	55.4	32.6	45.9	42.2	98.9	127.1	152.2	133.5
1445860_at	Tspan11	BB004011	0.738826	0.000421772	0.000132913	1.09399	3.17755	2.90453	27.8	33.9	42.6	10.6	22.7	41	31.4	30.6	91.4	107.1	79.4	87.2
1447242_at	---	BG092767	0.0141738	0.000482511	2.53702e-06	0.612973	1.7802	2.90421	89.8	84.5	94.1	56.9	59.3	50.4	40.6	49.1	140.1	146.3	155.4	137.3
1460458_at	Crispld2	AK019034	0.462193	2.97509e-06	1.4959e-06	1.06426	3.09013	2.90354	279.5	396.5	339.3	318.3	384.5	356	354	324.8	1025	942	1105.6	1048.4
1433977_at	Hs3st3b1	BG918344	0.146922	0.000347443	0.000192671	0.676678	1.96466	2.90339	15.5	14.4	17.4	9.3	8.2	6.1	8.2	15.8	28.8	29.1	27.4	25.9
1435083_at	Ctxn1	BI155559	0.0996201	0.00132122	0.00101629	0.890952	2.58571	2.90219	53.9	53.6	52.5	50	50.1	45.2	39.6	52.2	100	167	125.1	150.9
1422643_at	Moxd1	NM_021509	0.0975335	0.000272642	0.000784923	1.34477	3.89976	2.89994	185.6	155.3	134.4	151.2	230.6	197.6	147.4	266.9	443.2	635.9	719.2	644.9
1435314_at	Tph2	BG071575	0.654659	0.000146617	0.0012212	0.865497	2.50877	2.89865	5	5.3	3.8	3	4.4	6.3	1.1	3	11.2	10.1	9.6	12
1434731_x_at	Prdx1	AV124700	0.756153	1.01539e-05	5.14305e-06	0.967637	2.80397	2.89775	3069.9	2067.2	2538.5	2487.1	2277.8	2842.4	2183.8	2529.8	7613.5	6649.2	7567.6	6665.6
1454659_at	Dctd	BG069699	0.606555	0.00016995	0.000116752	1.06876	3.09409	2.89503	25	20.1	14.1	23.7	24.5	21.9	19.8	22.4	59.3	58.4	78	60.8
1459400_at	A630038E17Rik	BB211129	0.443725	0.0136326	0.00127946	0.715481	2.07113	2.89474	10.3	4.3	2.5	6.8	4.2	6	6	0.9	12.9	13.4	10.1	13.1
1422615_at	Map4k4	NM_008696	0.818678	1.42419e-05	5.78742e-06	1.01944	2.95005	2.89379	226.9	172	240.9	183.1	208.8	208.5	208.9	212.7	545.5	615.1	593	674
1418027_at	Exo1	BE986864	0.954845	0.00121978	0.000102251	1.01969	2.94967	2.8927	6.2	12.6	20.7	6.2	6.9	12.1	13.4	14.2	30.1	31.1	36.9	36.7
1458902_at	---	BB463474	0.227455	0.00168006	0.000632639	0.836391	2.41896	2.89214	14.7	16.8	21.2	12.7	15.9	13.8	12.6	12.4	30.4	48.7	36.8	42.3
1428228_at	Pgm3	AK013402	0.43903	4.59179e-06	3.37019e-06	1.1079	3.2032	2.89124	78.8	61.2	92.2	61.6	76.2	98.9	72.3	78.1	221.5	223.9	246.3	249.4
1440230_at	Tsku	BB548458	0.173685	1.35648e-05	1.21323e-05	1.21199	3.50373	2.89089	110.9	62.2	85.9	89.6	96.9	122.8	93.7	109.1	269.1	335.2	304.5	312.6
1448647_at	Man2a1	NM_008549	0.390426	1.10581e-06	5.85933e-07	0.947224	2.73698	2.88948	508.6	447.5	547	459.9	460.5	495.1	482.1	421.7	1339.9	1431	1251.7	1350.1
1417401_at	Rai14	NM_030690	0.00644394	0.000499386	0.000107932	0.707143	2.04317	2.88933	84.2	91.5	75.4	70.9	64.2	48.4	54.4	60.7	138.3	152.9	178.3	188.4
1449957_at	Ptprv	NM_007955	0.868092	0.000330085	0.00108236	1.03857	3	2.88859	44	34.4	47.8	50.1	55.6	66.7	31.7	29.1	136.6	162.8	111	118.5
1438862_at	---	BB227434	0.841155	0.00131134	0.00123896	1.05288	3.04135	2.88858	31.7	17.4	37.1	17.8	32.1	24.9	16.5	36	65.7	77.1	71.6	101.9
1430851_at	Zfp444	AK012846	0.172272	0.317982	0.00283466	0.461883	1.33318	2.88641	91.1	12.3	70.4	49.2	14.6	18.7	15.3	54.4	70.8	73	70.8	82.7
1422610_s_at	Igf2bp3	NM_023670	0.0827599	0.0208721	0.00552092	0.685583	1.97853	2.88591	15.6	11.6	17	21	12.4	8.5	14.9	8.9	25.4	46.2	30.1	27.3
1428319_at	Pdlim7	AK010339	0.152339	0.000410378	7.02335e-05	0.812126	2.34298	2.885	429.1	287.3	395.9	276.4	285	261.6	310	271.2	687.6	844.1	778.4	943.6
1422592_at	Ctnnd2 /// LOC100045979	NM_008729	0.246369	0.0192118	0.00743077	0.585973	1.69005	2.88417	10.9	16.9	9.5	6.9	1.4	14	7.8	2.7	17	19.5	16.7	21.5
1436320_at	---	W45978	0.260764	2.27779e-05	1.9692e-05	1.10345	3.18221	2.88388	518.7	614.2	466	653.5	659.6	577.4	603.9	644.5	1516.5	1899.3	1936.1	1815.7
1445056_at	9230102K24Rik	AV380845	0.614789	0.00799904	0.00474149	0.778986	2.24638	2.88372	1.4	10.4	6.9	8.9	1	2.9	10.2	7.4	15.6	12.7	16.4	17.3
1419663_at	Ogn	BB542051	0.0946855	1.13986e-06	1.18087e-06	1.15135	3.31968	2.88329	1548.7	1255.7	1460.2	1196.1	1684	1567.5	1637.5	1398.2	4523.3	4874.3	4196.7	4533.5
1441532_at	---	BB387438	0.548914	0.348606	0.0089227	0.58982	1.7006	2.88325	2	24.2	4.3	2.9	2.6	7.4	4.9	4.8	10.2	11.5	20.2	14.9
1449025_at	Ifit3	NM_010501	0.0112886	0.0138569	0.00830939	0.821861	2.36948	2.88307	194.4	206.4	201.6	215.5	177.2	185.8	165.3	143.9	503.4	423.2	312.8	698.6
1454926_at	Sphkap	AV327549	0.13174	6.0993e-07	4.30209e-06	1.26259	3.63997	2.88293	33.2	24.2	35.6	28.1	41.1	31	47.5	33.3	115.4	112.2	103	110.2
1427608_a_at	Tcrg-V1	X03802	0.122834	0.190838	0.00638221	0.486692	1.40304	2.88281	19.5	6.3	16.8	10	1.1	8.1	11.5	4.9	23.5	14.5	19.1	16.7
1439313_at	Lphn3	AV338336	0.201253	0.00748489	0.00823492	0.662447	1.90928	2.88217	13.1	10.8	12.5	11	5.2	14.7	9.4	2.1	23.1	27	15	25.4
1426715_s_at	Slc46a1	AK003278	0.705084	5.47479e-06	6.91274e-06	1.04771	3.01655	2.87918	44.4	59.9	57.5	43.6	56	53.3	42.2	63.7	138.8	162	158.9	159.9
1451950_a_at	Cd80	D16220	0.00567049	9.36202e-05	2.70455e-05	0.688877	1.98164	2.87662	44.8	50.6	43.2	52	31.3	28	40.9	31.1	94.5	94.4	105.7	83.1
1432366_at	4930447K03Rik	AK015408	0.418653	0.0338565	0.00632741	0.675676	1.94324	2.876	6.2	3.4	14.2	13.2	12.6	2.3	4.4	5.7	12.8	21	19.2	18.9
1455798_at	Galk2	BB771515	0.416148	4.93949e-05	4.50381e-05	0.94475	2.71654	2.8754	121.7	134.6	145	125.4	143.5	120.5	114.3	119.3	358.9	332.4	322.1	417.4
1450061_at	Enc1	BM120053	0.073152	0.000107438	0.000162286	1.1626	3.34258	2.87509	94.6	77	97.9	87.2	91.9	110.4	112.6	99.8	356.9	260.6	311.5	263.3
1450862_at	Rad54l	AV310220	0.732186	3.44303e-07	2.76115e-05	0.941878	2.7079	2.875	30.2	33.3	39.3	31.4	37.2	23.3	22.9	43	91.5	87.1	92.1	92.7
1457402_at	---	BB533647	0.0154787	0.00107423	0.000366876	0.776728	2.23289	2.87473	138.6	146.9	177.8	140	122.2	125.4	107.1	113.9	295.3	401.3	276	374.5
1441840_x_at	Sbno2	BB533975	0.271156	0.00719702	3.81168e-05	0.706306	2.02973	2.87372	23.9	22.4	46.9	17.8	21.2	14.6	21.7	20.9	60.9	62	50.7	51.7
1437121_at	Dennd1c	BB168293	0.110535	0.0022444	0.000374735	0.686976	1.9741	2.87361	61.5	56.5	94.4	61.7	49.4	62.2	50.2	26.5	158.5	142.9	113.5	126.2
1430193_at	Casc5	BF021255	0.735717	0.000295683	0.000712362	1.05533	3.0322	2.87324	31.4	27.9	31.6	30.2	21.4	33.3	29.3	43.8	82.8	104.4	73.3	106.7
1438410_at	Prtg	BB295128	0.0339376	0.0253525	0.0064598	0.587824	1.68862	2.87267	24.5	22.6	28.2	24.9	16.2	5.8	13.7	23.2	38.6	28.8	46	55.8
1439665_at	Lpar4	BB417145	0.854166	0.00015174	0.000180066	1.01793	2.92409	2.87258	38.6	39.9	48.9	39.9	46.2	46.9	43.7	33.5	130.5	138.3	95.9	124.5
1417177_at	Galk1	NM_016905	0.131771	1.58328e-05	5.33914e-06	0.867514	2.49133	2.8718	259.8	210.5	285.4	236.1	218.7	216.7	236.4	188.6	555.6	665.3	648.9	601.1
1422557_s_at	Mt1	NM_013602	0.377295	1.01942e-05	1.80091e-06	1.11393	3.19892	2.87174	2518	1677.7	2985.6	2192.7	2531	2680.9	2511.5	2718.6	8111.1	7107.9	7759.9	7007.8
1457637_at	---	BE992966	0.602233	0.000504233	0.000373127	0.959551	2.75506	2.87119	86.3	88.6	105.5	75.6	91.8	83.7	82.8	83.3	279.5	217.2	286.4	197.7
1453748_a_at	Kif23	BG082989	0.730273	0.000729889	0.000388554	1.07797	3.09492	2.87107	8.3	3.1	9.1	9	8.8	5.9	8.5	8.6	24.2	19.8	19.5	27.8
1425367_at	Itgal	AF065902	0.0505098	4.01364e-05	0.000406434	2.5	7.17725	2.8709	4.3	12.3	3.2	18	27.9	19.2	13.2	34.2	77.9	63.8	58.6	71
1427368_x_at	Fes	BG867327	0.0388413	1.70378e-05	5.16357e-06	0.796298	2.28546	2.87011	218.2	186.7	246.5	202.3	191.2	183.4	158.9	146.3	484.6	517	437.7	511.8
1446544_at	---	BB353644	0.184185	0.493042	0.00287155	0.448211	1.28625	2.86975	27.3	7.1	11.4	7.3	6.8	3.1	6.2	7.7	19.2	19.6	10.9	18.6
1447787_x_at	Gjc1	AV148957	0.905052	0.00117368	0.00133722	1.01994	2.9264	2.86918	69.1	111.8	96	79.1	114.1	102.4	66.6	80	184	260.4	279.6	317.8
1435466_at	Sarm1	BQ175571	0.596859	0.0230684	0.00467261	0.812428	2.33026	2.86827	19.1	4.8	36	27	22.6	17.8	8.9	21.3	41.1	46	71	44.4
1422211_a_at	B3gnt3	AY037785	0.767988	0.000177915	9.08603e-05	1.05349	3.02071	2.86732	31.1	40.1	24.9	19.8	24.6	35.4	33.7	28.4	81.3	91.7	75.8	101.3
1441904_x_at	Fam114a1	AV364676	0.444492	0.000125875	9.13291e-05	0.848516	2.43206	2.86625	199.7	149.7	262.6	169.6	222.4	125.6	199.2	116	435.1	457.2	477.4	531.2
1457944_at	---	BM218086	0.958363	6.90789e-06	1.10447e-05	0.992852	2.84548	2.86596	205.2	158	149.4	144.9	190.7	123.3	148.7	190.1	452.6	509.4	436.2	472.7
1458869_at	2900076A13Rik	AW556218	0.307658	0.00119524	6.58684e-05	0.758991	2.17468	2.86523	53	43.4	81.2	36.5	45.1	31.2	55.9	30.3	109.2	129.5	109.5	117.4
1453585_at	1600010M07Rik	BG084561	0.335083	0.000643869	0.000387792	0.908369	2.60245	2.86497	35.5	41.9	29.7	31.5	32.9	27.6	31.6	33.8	113.3	77.3	80.5	89.6
1418535_at	Rgl1	NM_016846	0.232138	0.000621907	0.00029741	0.869209	2.49002	2.8647	75.5	54.9	83.1	67.1	62.7	69.7	55.8	55.7	133.9	190.5	172.6	201.7
1418271_at	Bhlhe22	NM_021560	0.30201	0.00016285	0.000283685	1.114	3.189	2.86266	24.1	22.6	27.3	26	27.2	31.7	21.6	30.9	61.7	88.9	89.5	78.8
1443208_at	---	BB056087	0.176568	0.00366654	0.00094567	0.785575	2.24841	2.86212	102.1	78.2	139.5	89.2	69.1	81.8	93.8	76.6	164.4	252.3	225.4	277.5
1441974_at	Camk4	BB209139	0.903105	0.00112871	0.000703586	0.970297	2.77624	2.86122	16.6	6.5	15.8	11.6	8.6	11.1	17.3	12	42.2	27.7	33.1	37.2
1420461_at	Mst1r	NM_009074	0.420388	0.00390722	0.00516925	1.1144	3.1862	2.8591	63.4	44.3	60.5	47.7	65.5	53.5	49.1	72.5	118.8	137.8	217.8	213.5
1417721_s_at	Laptm5	AF364050	0.00864245	3.05594e-05	5.92151e-06	0.769695	2.19969	2.85788	411	316.8	389	376	298.7	287.4	303.5	259.4	823.8	899.9	731.1	828.9
1422705_at	Pmepa1	AV370981	0.332961	2.20344e-05	5.9825e-09	0.870053	2.48638	2.85773	627.9	455	804.5	545.9	546.6	543.2	527.7	499.6	1492.8	1472.3	1541.2	1543.8
1422303_a_at	Tnfrsf18	AF229434	0.237007	0.00138071	0.000345134	0.829822	2.37034	2.85645	31.1	20.3	33.1	38.9	26.4	27.8	23.6	24.6	65	91.9	64.1	71.5
1438406_at	Scarf2	AW913815	0.703729	0.000404391	0.000434769	0.939727	2.68204	2.85406	105.4	89.8	128	86.6	97.1	125.6	65.6	96.8	253.3	241.7	263.1	341
1422160_at	H2-T24	L22338	0.42773	0.00123097	0.000918005	0.896061	2.55689	2.85348	27.9	23.2	21.3	19	20.6	24.5	22	14.8	75.4	57.6	49.6	51.1
1437137_at	Fam70a	AV280875	0.923221	0.00101713	0.00493062	0.969359	2.76602	2.85345	8.5	9.7	10.2	7.5	5.6	13.7	12.7	2.8	18.5	26.1	23.7	31
1459961_a_at	Stat3	BG069527	0.0178399	0.00025354	0.000107393	0.822963	2.34702	2.85191	81.4	86.5	68.9	75	59	67.5	66.4	63.7	191.2	180	148.9	211.7
1424065_at	Edem1	BG064496	0.0661993	8.4713e-05	2.25928e-05	0.798552	2.27696	2.85136	339.1	237.5	279.1	276.6	193.4	248.4	210.3	252.1	564	628.7	717.9	667.6
1428661_at	Nfkbil2	AK013272	0.0100988	0.000813495	0.000300017	0.660089	1.8816	2.85053	42	39.2	39.7	36.2	33.4	27.8	17	25.5	59.4	79.2	72.3	84.7
1452270_s_at	Cubn	AF197159	0.180118	0.00263757	0.00033907	0.745763	2.12463	2.84893	14	30	27.2	29.1	13	20.8	19.8	21.2	42.4	59.1	61.3	50.3
1437249_at	Skap1	BG075562	0.349849	0.0696475	0.00909011	0.663823	1.89078	2.84833	11.4	17.5	24.8	4.9	8.9	14.3	12.2	3.5	30.6	37.4	18.1	24.7
1416761_at	Hsd11b2	BC014753	0.454548	0.0110814	0.0047593	0.839355	2.39032	2.84781	25.1	54	46.1	29.8	23.8	42.4	32.4	31.5	124.5	86.2	60.9	98.9
1421840_at	Abca1	BB144704	0.943679	5.52e-05	3.60383e-05	1.00592	2.86362	2.84676	1277.4	1179.2	1550.2	1111.1	1280.7	1382.8	1274.1	1210.6	3642.5	4073.9	3072.7	3866.6
1440493_at	Galnt10	BB399121	0.707135	0.00486886	0.0044853	0.879346	2.50307	2.84651	15.8	10.6	6.1	16.4	2.8	15.5	14.2	10.5	21.2	37.8	32.7	30.7
1437429_at	Adamtsl1	BB193444	0.270674	0.00018204	0.000188831	1.12595	3.20466	2.84619	51.7	39.1	47.2	33.5	43	50.5	50.7	48.9	148	123.5	115.6	162.5
1448346_at	Cfl1	NM_007687	0.517458	4.13067e-08	4.83337e-11	0.965532	2.74705	2.84512	1545.5	1219.5	1466.3	1423.2	1351.6	1372.4	1400.1	1335.5	3857.9	3910.5	3843.1	3921.7
1460302_at	Thbs1	AI385532	0.282836	0.000443287	3.45648e-05	0.830492	2.36284	2.84511	814.8	491.5	537.7	460.9	441.8	513.4	500	459	1219.2	1580	1367.2	1279.7
1436119_at	Aldh1l2	BM231794	0.124122	6.20024e-06	4.52245e-06	0.927115	2.63768	2.84504	194.9	203.8	177	184.4	185.8	171.4	164.3	183.2	457.3	476.2	539.1	532.3
1434891_at	Ptgfrn	AV253087	0.64929	4.12418e-05	2.15403e-05	0.963529	2.74096	2.84471	1022.9	790.3	1093.9	885	866.6	973.9	929	884.3	2346.1	2559.9	2492	2996
1452170_at	Chpf2	BC019714	0.0168702	3.97369e-05	2.01781e-05	0.849709	2.41702	2.84452	469.9	393.7	447.2	443.8	372.1	369.6	404.1	345.1	930.3	1016.2	1104.8	1189.6
1417939_at	Rad51ap1	BC003738	0.134295	0.000122093	0.000574265	1.41339	4.01969	2.84401	5.2	7.2	7.7	5.3	12.8	9	6.5	7.6	22.9	31	26.5	21.7
1444889_at	Rassf2	BB537004	0.416317	0.0085438	0.0014732	0.706087	2.00696	2.84236	11.3	24	15.2	7	2.6	16.9	7.3	13.8	27.1	31	30.3	27
1417764_at	LOC636537 /// Ssr1	BG077348	0.0617469	1.30582e-05	1.0023e-05	0.910366	2.58647	2.84114	610	626.2	652.5	579.1	614.5	547.7	527.9	556.5	1454.1	1481.8	1728.3	1718.7
1421412_at	Gsc	NM_010351	0.0173908	0.0494013	0.00780853	0.611149	1.73572	2.84009	44	35.3	39.7	26.3	21.2	28.3	20.9	18.4	78.3	35.1	60.6	78.2
1427295_at	Slc38a10	BB406585	0.114673	1.33696e-05	4.43904e-06	0.883751	2.5097	2.83983	658.3	535.1	668.2	549.6	560.6	555	504.5	510.8	1385.5	1467.2	1522.8	1675.9
1420970_at	Adcy7	NM_007406	0.835907	0.00114673	0.00111795	1.01099	2.87085	2.83965	101.6	100.6	87.3	83.7	95.8	97.1	91.9	92.5	219.7	297.7	216.9	337.1
1452770_at	Vkorc1	AK003237	0.854075	1.55907e-07	1.02669e-07	0.990209	2.81095	2.83875	1699.9	1496.1	1804.9	1740.3	1827.7	1645.1	1614.1	1588.3	4546.3	4976.8	4698.4	4727.7
1445532_at	Myo16	BB081552	0.157469	0.0193643	0.00628964	0.697105	1.97884	2.83866	22	21.7	30.1	16	22.7	15.7	16.4	7.8	34.2	62.3	44	37.2
1426937_at	6330406I15Rik	AK018128	0.0148683	0.000129604	7.9538e-06	0.70787	2.00935	2.83858	457.1	382.3	561.5	460.6	321.4	345.8	362.8	287.7	945.9	1027.2	833.3	934
1451243_at	Rnpep	BC019200	0.292588	0.000869876	0.000250559	0.829369	2.35407	2.83839	181.4	199.6	170	104.8	167	112.3	118.2	146.4	427.8	435.9	306.7	373.4
1443434_s_at	LOC100044106 /// Plxnc1	AV317262	0.39789	0.0507119	0.00420381	0.66005	1.87345	2.83835	16.1	10.6	1.3	12.3	7.2	6.3	11.6	1.5	22.4	16.9	14.9	21.3
1428786_at	Nckap1l	BM238906	0.00651994	7.41666e-06	1.85752e-06	0.812889	2.30724	2.83832	242.1	197.5	214.5	213.3	173.4	185.4	168.3	178	525.2	531.2	455.4	489.5
1425974_a_at	Trim25	D63902	0.0715894	1.67462e-05	5.54252e-06	0.876508	2.48779	2.8383	387	319.6	363.4	305.8	308.1	310.1	290.6	297.1	883.2	931.4	757.6	850.5
1440924_at	Kif20b	BM239553	0.288747	0.000736457	0.00458685	0.670588	1.90294	2.83772	6.8	8.3	7.9	11	6.6	4.8	11.1	0.3	18.3	14.3	15.8	16.3
1455576_at	Rinl	AW493583	0.0795602	6.5951e-05	5.52587e-05	0.803042	2.27757	2.83617	29.1	36.3	34.2	31.9	32.8	28.7	21.6	22.5	67	72.3	74.2	86
1439252_at	---	AV301185	0.966717	0.00203596	0.00057681	0.984012	2.7907	2.83604	6.9	10.5	29.1	22.3	21.1	15.4	7.3	23.9	45.5	41.2	50.6	54.7
1429658_a_at	Smc2	BI684556	0.881128	0.000729401	0.000290624	0.968157	2.74403	2.83428	32.7	30.4	38.5	61.7	49.5	36.2	29.7	42.7	127	88.2	110.4	122.5
1416234_at	Lrrc59	AW476171	0.225396	2.63792e-06	1.87879e-06	0.926583	2.62609	2.83416	1015.6	835.4	915.3	923.6	948.9	848.6	833.9	787.6	2257.9	2314.1	2538.1	2579.9
1439282_at	D930023I05Rik	BB055532	0.0228056	0.13036	0.0021146	0.494098	1.40008	2.83362	40.1	47.6	79.7	69.8	26.6	39.4	25.4	25.8	65	67	98.1	102
1452191_at	Prcp	AK011112	0.360576	3.65487e-05	4.65807e-05	1.04342	2.95495	2.83198	147.5	160.6	153.5	153.3	157	164.7	174.6	145.3	386.7	467.7	443	519.6
1423026_at	Rad51c	NM_053269	0.790198	0.000420075	0.00166374	0.93228	2.63883	2.83051	10.1	11	13.7	9.5	10.5	5.6	7.9	17.3	30.5	26	24.9	35.5
1418455_at	Copz2	NM_019877	0.250396	2.5025e-06	2.0834e-06	0.938225	2.65515	2.82998	556.1	507	574.8	594.4	556.6	550.3	516.3	471.2	1348.7	1508.4	1591.8	1478.2
1418902_at	Chid1	BC006876	0.204892	1.23415e-05	1.30913e-05	0.875044	2.47561	2.82912	76.9	75.2	60.8	72	77.5	58.3	55.3	58.2	165.2	177.2	166.6	196.3
1449930_a_at	Ssr2	NM_025448	0.98318	1.74818e-05	1.05486e-05	0.998499	2.82415	2.8284	564.2	437.1	497.3	433.2	508.6	491.6	475.6	453.1	1245.2	1321.1	1342.1	1547.3
1423233_at	Cebpd	BB831146	0.00137956	0.000107804	2.48239e-06	0.622781	1.76131	2.82814	1325.1	1067.2	1383.5	1142.3	666.3	818	818.9	759.7	2164	2298	1962.3	2238
1422604_at	Uox	M27695	0.57688	0.00121575	0.000488794	0.90555	2.55988	2.82688	34	28.3	16.7	23.7	23.9	20.6	28.3	20.2	82.9	58.6	64.4	57
1418604_at	Avpr1a	D49729	0.19683	0.000496841	0.000262313	0.887204	2.50711	2.82585	27.7	30.4	21.4	26	21.7	23.5	25.5	22.9	61.5	66.8	55.1	81.1
1417231_at	Cldn2	NM_016675	0.662263	2.53184e-05	6.20563e-05	0.926215	2.61632	2.82474	23.4	35.6	29.5	26.7	21.9	36.7	19.6	28.5	80.8	69.8	80.6	70.2
1452527_a_at	P2rx4	AJ251462	0.430033	0.000435852	0.000221158	0.914545	2.58333	2.82472	233.2	263.5	324.6	215.5	230.3	251.1	256.6	210.2	584.9	750.8	568.8	773.9
1424426_at	Mtap	BG075139	0.122482	0.000154964	8.57628e-05	0.866523	2.44738	2.82436	92	77.4	70.8	85.7	81.7	64.7	70.1	65.9	180.1	217.5	173.5	226.5
1434653_at	Ptk2b	AV026976	0.692628	4.82751e-05	1.58432e-05	1.06233	3.0003	2.82425	106.5	58.3	100.5	73.2	97.4	73.2	92.5	96.5	282.5	264	233.3	235.8
1442544_at	Igh-6	BG143662	0.0876927	0.969912	0.00339377	0.358238	1.01149	2.82353	18.9	16.5	14.7	2.1	8.4	6.4	3	0.9	14.3	14.4	12.6	11.5
1448566_at	Slc40a1	AF226613	0.798045	0.00169186	0.00148779	0.978676	2.76235	2.82253	96.7	100.4	85.6	73.7	82	80.8	97.2	88.8	182.9	321.6	237.8	242.2
1425625_at	Il13ra1	S80963	0.599905	0.0331559	0.0004468	0.775229	2.18807	2.82249	6.6	2.4	22.2	12.4	7.6	11.7	7.6	6.9	19.1	28.3	25.1	22.9
1435484_at	Slc5a3	BM729431	0.576914	0.00133023	0.000844583	0.935277	2.63961	2.82227	499.4	374.1	556.7	380.6	391.5	483.9	400	418.2	886.9	1453.2	1118.4	1321.3
1427424_at	Galnt6 /// LOC100047499	BB399489	0.0452099	0.000414174	0.000698161	1.97705	5.57705	2.8209	13.4	3.7	2.3	11.1	17.6	13	13.3	16.4	35.6	38.4	41.7	54.4
1436414_at	Obsl1	AW556912	0.220319	0.000887167	0.000649707	0.841638	2.3727	2.81914	30.1	40.4	36.6	39.4	40.8	31	26	25.5	73.3	80.8	83.8	109.7
1434049_at	Entpd3	BB547934	0.00312583	0.0117555	0.000149826	0.538426	1.51759	2.81857	119.6	124.9	107.2	80.3	57	67.7	54.2	53.7	134.7	159.4	168.3	193.2
1438588_at	Plagl1	BB540903	0.0930985	0.00256349	0.000610081	0.729666	2.05602	2.81776	78.5	59.8	94.4	63.6	54.8	66.1	36.8	58.5	124.2	188.5	155.7	140.8
1422628_at	Fam111a	NM_026640	0.0687086	1.01464e-05	2.16014e-06	0.824819	2.32386	2.81741	277.3	221.5	287.9	303.6	245.3	211.5	245	197.5	673.2	606.6	592.8	661.1
1458735_at	---	BG075836	0.90692	0.00229067	0.00265106	0.963235	2.71324	2.81679	4.2	3.4	1.5	4.5	1.6	5.3	3.4	2.8	11.9	8.3	7.7	9
1446047_at	---	BG075399	0.971521	7.75977e-05	0.0001304	1.00584	2.83324	2.81679	37.5	51.9	56.7	42.2	52.3	35.8	61.7	39.6	126.2	157.2	124.2	125.9
1437528_x_at	A730017C20Rik	BB318702	0.282683	0.00276584	0.00308429	1.41597	3.98739	2.81602	4.4	3	4.8	11.6	9.6	6	8.6	9.5	20	32.3	18.5	24.1
1423756_s_at	Igfbp4	BC019836	0.879055	3.28015e-07	5.0472e-09	0.988826	2.78429	2.81575	3557.4	3500.9	4464.1	3369.2	3809	3768.5	3687	3460.7	10154.2	10684	10280.6	10343.7
1450872_s_at	Lipa	AI596237	0.613637	0.000211565	0.000104326	0.948655	2.6711	2.81567	572.8	503.7	752.9	546.7	604.1	561.4	565.7	522.9	1452.2	1530.2	1445.8	1918.6
1418638_at	H2-DMb1 /// H2-DMb2	NM_010387	0.014149	6.10237e-06	2.39975e-05	0.668105	1.88113	2.81562	63.3	58.5	68.7	64.4	54.5	29.6	50	36.2	127.5	113.4	116.1	122.5
1433943_at	Itprip	BM207348	0.522874	3.84633e-05	1.20565e-05	0.917092	2.58195	2.81537	89.2	75.1	92	57.3	74	67.7	60.3	85.6	211.1	211	210.3	177.3
1460431_at	Gcnt1	AK017462	0.709567	0.000219095	0.000220287	0.966718	2.72153	2.81522	77.7	73.6	93.1	83.1	93.6	66.5	78	78.5	262	227.4	177.5	224.4
1442533_at	---	BG068293	0.274053	0.413963	0.000961529	0.492308	1.38462	2.8125	5.8	5.2	1.9	0.1	1.3	1.4	2.2	1.5	5.4	3.3	4.6	4.7
1455227_at	Nceh1	AV369935	0.503296	0.000110414	0.000119561	0.950331	2.67156	2.81119	123.5	111.5	120.1	128.1	130.3	108.8	123.9	96.2	292.5	382.6	284.9	330.9
1442612_at	C730036E19Rik	BB283688	0.062654	0.113369	0.00608792	0.525773	1.47766	2.81046	5	10.5	7.8	5.8	6.2	2.2	2.8	4.1	8.6	8	13.2	13.2
1428420_a_at	1200009I06Rik	AK005443	0.781991	0.000360071	0.000327326	1.0553	2.96544	2.81004	27.1	26.5	29.9	46.7	23.6	41.5	39.1	33.2	77.3	92.4	105.8	110.6
1421260_a_at	Srm	NM_009272	0.309645	3.81534e-06	1.20744e-06	0.923939	2.59602	2.80973	716.8	538	661.1	609.7	546.1	624.7	549.7	613	1529.2	1579.3	1736	1712
1436196_at	C030046G05	BE691546	0.000579014	1.43572e-05	6.86128e-06	0.814227	2.2866	2.80831	73.4	74.9	68.9	72.4	55.9	56.6	62.3	61	159.6	187	159.6	156
1434678_at	Mbnl3	AV306759	0.107959	1.12119e-05	0.000164538	1.47474	4.13842	2.80621	51.5	51	52.8	34.7	74.2	58.4	48.2	99.4	171.2	189	208.3	217.8
1431393_at	Six6os1	AK015397	0.140936	0.00556246	0.000138988	0.699491	1.96265	2.80583	14.2	21.5	14.3	8.9	10.9	10.6	10.4	9.3	22.5	30.5	31.5	31.1
1430536_a_at	Erh	BB071632	0.0970243	1.86343e-05	7.06058e-06	0.850478	2.38588	2.80534	743.3	663.4	743.3	570	623.1	485.9	607.5	596.8	1612	1480.2	1797.4	1600
1456046_at	Cd93	AV319144	0.773299	6.51032e-05	3.64628e-05	0.974105	2.73126	2.80386	753.7	652.3	796.7	554.6	687.8	682.5	713.2	602.4	1666.3	1944	1760	2160.6
1423683_at	Cdca4	AF322238	0.348492	8.73534e-05	2.95168e-05	0.873496	2.44842	2.80302	203.4	162.9	201.6	130.1	155.3	142.7	125.4	186.3	407.3	392.8	421.9	487
1442798_x_at	Hk3	BB324660	0.411812	0.000627544	0.00106471	0.835125	2.34083	2.80297	58.9	83	81.9	83.1	93.5	78.6	41	43.2	204.8	165	145.4	203.2
1422528_a_at	Zfp36l1	M58566	0.0748494	0.00167623	0.000610649	0.786991	2.20577	2.80279	404.3	296.3	368.4	436.1	242.2	281	342.8	318.5	976.3	865.7	871	606.9
1423475_at	Cnnm2	BB278418	0.302959	8.53025e-05	7.92345e-05	0.918253	2.57297	2.80203	73.8	67	61.1	66	70.2	66.5	52.8	56.5	149.1	184.2	159.3	196.7
1422067_at	Klrb1b	AF342896	0.246689	0.00439763	0.00406329	0.743396	2.08302	2.80203	15.4	10.8	14.2	12.6	10.1	16.7	6.1	6.5	24.9	36.8	23.8	24.9
1448749_at	Plek	AF181829	0.0317423	0.000627469	0.000203004	0.782766	2.19318	2.80183	326.5	286.6	344.8	256	257.1	242.8	249.9	200.4	643.5	799.7	547.8	671.3
1436097_x_at	Arhgap9	BB327418	0.202378	0.000448239	0.000153655	0.859578	2.40801	2.80138	81.5	82.2	117.6	88.3	82.8	78.2	71.4	85.3	190.7	242	197.9	259.4
1452001_at	Nfe2	L09600	0.769289	0.000425354	0.000231879	0.931264	2.60809	2.8006	25.7	59.3	54.9	40.5	58.8	34.3	28.9	46	117.4	111.9	104.1	137.1
1458657_at	---	AA822260	0.394709	0.000353511	0.000378233	0.870397	2.43759	2.80055	51.9	52.1	62.2	42.9	63.7	35.8	43.2	39.3	104.7	141.6	118.4	145
1432466_a_at	Apoe	AK019319	0.0209761	2.71345e-06	1.57303e-06	1.35199	3.78582	2.80018	2630.7	2875.8	3454.2	2038.7	3740.3	3904.4	3809.2	3417.2	11057.5	9946	9697.2	10941
1440169_x_at	Ifnar2	BB522265	0.159865	4.69482e-05	1.94906e-05	0.863006	2.41618	2.79973	190.3	154.4	196.5	150.8	154	167.9	149.7	125.6	399.7	428.1	374.5	469.7
1459374_at	---	BB133363	0.718338	0.00414996	0.00350984	1.15439	3.2304	2.79835	14.2	12.1	0.4	15.4	4.9	15.1	16.4	12.2	24.9	33	34	44.1
1435855_x_at	Aldh18a1	BF148128	0.0164372	2.14139e-05	6.23946e-06	0.787266	2.20194	2.79694	189.8	189.1	231.7	195.1	152.6	175.6	139	167.1	409.2	417.3	477.8	469.8
1441516_a_at	C130050O18Rik	BB527707	0.36087	0.000402656	0.000149561	0.849448	2.37437	2.79519	72.8	51.2	93.5	81.4	63.8	75.1	71.5	43.5	159	192.7	156.6	201.4
1460141_at	LOC100046401	BB811709	0.603538	0.000468808	0.000458921	0.87027	2.43243	2.79503	14.2	13.3	25.3	21.2	22.9	9.3	20.5	11.7	38.3	46.7	44.4	50.6
1436058_at	Rsad2	BB132493	0.604362	0.00247019	0.00204731	0.956804	2.67361	2.79432	352.1	365.1	342.2	452.3	354.6	403.4	326	362.4	993.4	1069.4	689.2	1289.7
1420170_at	Myh9	C80049	0.165418	0.000351157	0.000149799	0.880527	2.4598	2.79356	392.6	277.7	360.2	312.9	295.4	292.2	295.7	299.6	643.6	926.6	852.1	882.2
1427056_at	Adamts15	AV228731	0.0285055	0.000655229	0.00145901	1.35379	3.78087	2.79281	116.4	93.3	106.5	86.3	160.8	116.1	146	122	475.5	416.7	353.8	275.8
1441137_at	Bicc1	AV260198	0.396821	4.63222e-05	4.49635e-05	1.07359	2.99787	2.79238	995.8	741.5	910.5	776.7	1017.9	861.1	924.9	872.6	2149.3	2565.8	2878.7	2672.4
1420646_at	Nus1	NM_030250	0.125673	1.77083e-05	1.40217e-05	0.950087	2.65259	2.79195	107.5	100.7	97.8	96.7	92.9	97.4	93.5	98.8	246.2	242.8	296.3	282.9
1447819_x_at	Col8a1	BB546487	0.859086	0.000363943	7.72989e-05	0.957962	2.67272	2.79	687.1	393.3	374.2	308.1	297.3	547.2	465.2	378.9	1069.7	1162.8	1342.8	1135.9
1431420_s_at	Prelid1	BI082843	0.420956	4.91435e-06	3.00704e-06	1.05344	2.93871	2.78963	1113.8	914.2	1214.5	1035.2	1146.1	1095.1	1095	1170.1	2788.8	3299.6	3204.9	3277.6
1427974_s_at	Cacna1d	BB048682	0.640633	0.000250441	0.000274698	1.07091	2.98356	2.78599	52.1	36.3	61.1	45.1	52.6	61.4	39.3	55.1	124.8	172.7	128.3	154.8
1437928_at	Pcdh12	AV225493	0.673286	0.00164221	0.00144833	0.91033	2.53587	2.78566	45.4	28.9	39.7	25.4	30	40.3	17.4	39.2	74	106.6	72.9	100
1438200_at	Sulf1	BB065799	0.083637	5.86222e-05	3.71534e-05	0.796407	2.21781	2.78476	917.8	682.4	792.1	808.7	770.4	683.1	620.5	475.3	1607.2	1909.8	1650.1	1932.1
1416830_at	0610031J06Rik	NM_020003	0.214468	1.00828e-05	5.81261e-06	0.923572	2.57158	2.78439	698.3	561.3	649	671.6	637.3	588.3	611.9	545.5	1492.9	1754.6	1600.1	1787.6
1457040_at	Lgi2	BE947711	0.146361	0.00386226	0.00053468	0.710187	1.97704	2.78384	19.6	19.9	20.2	10	12.5	8.9	17.1	11	38	39.6	33	27.2
1433667_at	Lgi3	BB187947	0.015688	7.54589e-05	3.21363e-06	0.72153	2.00831	2.78341	26.5	26.5	31	36.3	22.9	21.6	23.2	19.1	62.8	60.5	64	54.3
1426318_at	Serpinb1b	AF426025	0.520388	0.00183582	0.00222491	1.06866	2.97015	2.77933	9.1	7.3	7.5	9.6	8.6	10.7	7.8	8.7	32.6	18.1	26.2	22.6
1421733_a_at	Tpst1	NM_013837	0.106598	0.000111	0.000148111	1.0832	3.0105	2.77926	327	362.7	355.3	345.6	408.9	376.1	376.8	344.5	954.7	1242.9	892.9	1095.9
1431179_at	Entpd7	BB873170	0.102727	0.00136446	0.000684284	0.817328	2.2714	2.77905	54.4	44.8	51.8	40.6	37.4	46.5	31.1	41.6	81.4	104.1	123.4	126.3
1453634_a_at	Erp29	AK013303	0.800604	2.02786e-05	6.31976e-06	0.969389	2.69311	2.77815	639.1	391.1	547.8	587.9	610.3	458.1	538.3	492.9	1350.5	1432.6	1439.8	1610.1
1423954_at	C3	K02782	0.00174871	0.000142657	0.000338282	1.43406	3.98314	2.77752	1532.4	1805.1	2012.3	1660.7	2692.5	2534.9	2590.6	2235.5	8083.9	7792.6	5441.8	6605.5
1455527_at	Cd163l1	BB328097	0.296901	0.00468661	0.0095233	1.26916	3.52456	2.77709	23.5	21.3	34.1	22.9	42.3	39.7	20.2	27	123.9	66.9	103.1	64.9
1458653_at	---	AI553556	0.00388183	0.000116157	2.68077e-05	0.577838	1.60432	2.77643	42.3	49.5	42.1	51.1	36.2	25.8	18.8	26.1	75.3	79.6	70.1	71.8
1442409_at	D9Wsu90e	BB166984	0.788624	0.00195149	0.00327259	1.05366	2.92539	2.7764	21.9	16.7	21.9	15.9	11.1	20.2	26.5	22.7	46.5	67.6	67.6	41.8
1450841_at	Stt3a	AA756810	0.040477	1.13166e-05	3.24843e-06	0.854633	2.37229	2.7758	770.6	657.6	750.7	621.6	626.6	614.7	595.8	556.3	1511.6	1626.1	1694	1811.9
1460271_at	Trem3	NM_021407	0.516625	0.00120314	0.00137246	0.877447	2.43437	2.77438	32.6	43.2	33.9	28.2	45.7	22.9	28	24.4	78.7	98.6	63.7	94.7
1425133_s_at	Rab3il1	BC020147	0.0895833	3.68166e-06	1.19449e-06	0.883421	2.45074	2.77415	242.8	220.6	270.7	273.8	234.5	228.1	226.4	201.4	624.5	650.9	563.2	631.5
1427257_at	Vcan	BM251152	0.0851606	0.000582957	3.95385e-05	0.747065	2.07213	2.77369	426.6	246.4	407.4	342.1	286.5	298.8	245.1	232.3	697.6	858.9	709.7	681.4
1457780_at	Stx11	BB767243	0.838972	0.000115009	5.60506e-05	1.03807	2.87897	2.77339	37.8	45.1	72.8	49.2	64	58.1	50.8	39.8	130.7	164.1	138.3	156.8
1444311_at	---	BB138395	0.479401	0.000746663	0.000831945	0.858124	2.37986	2.77333	25.3	25	21.8	15.3	23	24.8	17.5	9.7	59.3	59.1	43.6	46
1416969_at	Gtse1	NM_013882	0.513697	0.00392486	0.00142972	1.29859	3.60141	2.77332	15.5	14	38.2	3.3	19.4	24.1	20.1	28.6	62.5	56.7	52.4	84.1
1420831_at	Qsox1	AK004880	0.193186	5.29468e-06	1.96533e-06	0.896619	2.48659	2.7733	317.1	270.5	347.6	351.3	275.7	325.3	285.5	267	724.4	822.8	814.8	837
1422903_at	Ly86	NM_010745	0.0388749	5.96653e-05	2.9638e-05	0.861842	2.38993	2.77305	596.8	579.8	695.7	666.1	561.3	551.3	580.8	494.3	1720	1590.1	1370.3	1386.2
1418946_at	St3gal1	NM_009177	0.207958	2.00603e-05	1.86148e-05	1.11023	3.07686	2.77136	137.4	101.7	108.5	107.8	135.2	130.6	121	118.8	357.2	381.3	298.6	364.1
1439129_at	Dock5	AW495734	0.816275	6.85121e-05	0.000313501	1.05635	2.92725	2.7711	27.6	25.8	28.5	15.7	18.2	31.9	16.9	36.1	60	76.1	73.9	75.7
1450634_at	Atp6v1a	NM_007508	0.738651	4.16707e-05	2.0486e-05	0.972822	2.69509	2.77038	740.9	526.9	624.2	576.9	593.7	594.2	572.7	641.2	1459.5	1583.4	1763.2	1847.8
1453202_at	E330016A19Rik	AV285272	0.312187	0.00167028	0.000904577	0.887967	2.45989	2.77025	39.8	39.4	26.3	39.1	29.9	34.8	35	28.7	68	88.1	86.7	112.9
1423312_at	Tpbg	BQ177165	0.232345	0.000489835	0.00112613	1.28238	3.55193	2.76979	21.2	14.8	21.3	28.4	32.8	17.2	32.2	27.7	61.7	72.8	97.3	72.6
1425742_a_at	Tsc22d1	AF201285	0.387978	1.41704e-07	5.29444e-09	0.954262	2.64272	2.76938	3001.2	2462.5	2479.8	2559.9	2536.4	2552.5	2482.9	2451.2	6758	6906.4	6909.4	7183.7
1434201_at	Chrdl1	AV144145	0.795095	1.41228e-05	2.83604e-07	0.966467	2.67626	2.76912	137.7	131.5	135.6	78.3	116.9	122.9	123.2	103.9	332.1	313.1	309.6	338.1
1452330_a_at	Mxra8	BB765827	0.613832	9.25118e-06	7.69755e-06	1.02581	2.83975	2.7683	2024.8	1890	2328.1	2056.1	2113.2	2118	2240.4	2041.6	5184.8	6024.9	5911.2	6446.2
1447104_at	---	BF462860	0.350614	0.0759026	0.00898032	0.66586	1.84262	2.76727	3.8	18.2	10.6	8.7	8	2.7	10.5	6.3	15	17.7	27.1	16.3
1436413_at	Frk	BB831042	0.265996	0.000693212	0.00065817	0.848691	2.34821	2.76686	21.7	26.8	27.8	26.8	26.6	19.3	26.6	15	55.8	63.4	49.2	73.7
1423746_at	Txndc5	BC016252	0.0198894	4.76987e-05	2.73628e-05	0.846505	2.34167	2.76628	765.6	703.8	820	781.7	668.7	699.6	663.9	567.5	1576	1751.9	1820.6	2043
1418680_at	Serpind1	NM_008223	0.716511	0.00338094	0.000450018	1.13646	3.14179	2.76454	6.1	29.6	14.3	43.8	28.8	25.3	27.7	24.8	56.3	84.6	84	69.8
1437849_x_at	Armcx2	BB443695	0.00875654	1.22988e-05	4.47607e-06	0.849753	2.3482	2.76339	360.1	323.9	332.9	299.6	271.8	281.5	277.5	287.9	690.1	827.4	757.7	816.2
1419426_s_at	Ccl21a /// Ccl21b /// Ccl21c	NM_011335	0.0128554	0.000482995	0.000969534	1.29953	3.59039	2.76283	487.1	502.4	589.9	586.3	731.9	754.5	736.2	591.8	2024.4	2475.6	1537	1738.7
1428568_at	B230217C12Rik	BB376573	0.0872918	0.000255819	3.42905e-06	0.757649	2.09316	2.7627	53.5	93.7	66.1	77.6	53.2	55.1	53.6	58.5	159.3	158.6	134.8	156.2
1453462_at	Chst13	AV224550	0.221923	0.00359797	0.00104632	0.763864	2.11002	2.7623	30.1	34.2	30.4	17.1	28.6	17.4	15.2	24.2	43.3	59	68.3	65.3
1452924_at	Fam83d	BF730742	0.685312	0.00199209	0.00240818	0.895359	2.47316	2.7622	36.6	30.1	17.8	25.4	33.2	15.9	14.4	34.9	58.9	54.2	77.8	80.9
1418264_at	Cenpk	NM_021790	0.9412	0.000535897	0.000732596	1.00931	2.78754	2.76182	43.6	42.9	36.6	48.7	50.8	30.4	48.6	43.6	99.3	106	124.3	149.3
1437683_x_at	Serf2	AV047585	0.0673496	1.99763e-06	1.21571e-06	0.900004	2.4854	2.76155	1465.9	1270	1382.2	1471.1	1323.6	1320.1	1238.2	1148.4	3722.3	3576.2	3276.3	3316.6
1418268_at	Htr3a	NM_013561	0.0430966	0.00696365	0.00260488	0.590686	1.63113	2.76141	18.9	22.9	21.6	18.2	11	14.5	18.6	4.1	27.7	41.4	30	34
1442437_at	---	BB204671	0.952854	0.000159336	9.02348e-05	1.00893	2.78571	2.76106	7.4	10.7	9.4	6.1	8.4	10.2	7	8.3	26.7	19.6	23.1	24.2
1455049_at	Igsf3	BB484576	0.374916	0.000424009	0.000596211	1.10141	3.04097	2.76099	111.9	96	102.1	80.5	100.2	107.1	93	129.8	215.5	335.8	308.9	327.3
1433699_at	Tnfaip3	BM241351	0.369359	9.53661e-05	7.4666e-05	0.928827	2.56292	2.7593	147.7	139.1	167.6	132.9	147.5	134.7	148	115.3	356.2	381.7	439.8	327.5
1416498_at	Ppic	NM_008908	0.393982	3.53551e-06	4.31683e-06	1.02914	2.83967	2.75926	1252.9	1272.7	1336.4	1333.5	1304.4	1378.7	1409.8	1254	3429.7	3952	3441.3	3930.5
1435803_a_at	Eif4e2	BM120823	0.602126	4.49102e-06	3.66602e-06	1.02421	2.82603	2.75923	349.3	291.9	308.9	334.6	318.9	340.2	318.6	338.1	858.8	914.6	851.8	1005.4
1440093_at	Ednra	BB238381	0.0178146	0.0187133	0.00723018	0.742068	2.047	2.75851	41.7	44.3	47.9	36.3	31.7	38.2	28.1	28.3	127.5	66.1	77.3	77.5
1426261_s_at	Ugt1a1 /// Ugt1a10 /// Ugt1a2 /// Ugt1a5 /// Ugt1a	D87867	0.16659	2.00335e-07	4.41713e-07	1.17787	3.24819	2.75768	124.1	104.7	146	108.7	144.9	156.1	113.5	155	381.5	401.3	390	397.7
1423903_at	Pvr	BB049138	0.0909063	0.000125722	6.02522e-05	0.82375	2.2715	2.75751	111.8	89.8	109.6	88.8	91.3	77.1	93.7	67.4	254.3	221.9	192.9	239.5
1448592_at	Crtap	NM_019922	0.447097	1.96607e-05	1.24141e-05	0.953144	2.62688	2.75602	1473	1218.9	1553.5	1416.6	1400.1	1413.7	1343.3	1239.6	3226.6	3744.7	3838.8	4063.3
1422439_a_at	Cdk4 /// LOC640611	NM_009870	0.191892	8.68717e-05	6.70122e-05	0.926453	2.55306	2.75574	432.9	367.9	388.1	385.6	403.9	357.3	360	337.5	883.4	1014.1	942.3	1180
1428391_at	Rab3il1	AK004767	0.0363243	3.22473e-07	4.73364e-07	0.822318	2.26585	2.75544	330.8	326.2	372.5	311.1	305	278.2	294.6	224.6	786.7	761.7	730.3	758.9
1417061_at	Slc40a1	AF226613	0.653533	0.00106713	0.00117413	1.03612	2.85473	2.7552	260.8	230	223.2	199.5	270.6	215.4	235.9	224.6	534.4	838	548.9	686.5
1459679_s_at	Myo1b	AA406997	0.090687	8.40203e-05	0.000101408	1.20651	3.32158	2.75304	178.1	144.8	157.7	112.1	172.2	184.3	165.2	193.4	398.3	502.1	507.2	561.1
1428670_at	LOC72520	AW215497	0.241604	6.93365e-05	3.56675e-05	1.25653	3.45843	2.75236	87.8	84.3	87.9	34.7	93.3	74.4	97.9	104.7	237.3	280.3	275	226.6
1426971_at	Uba7	AK004894	0.343929	0.00025491	0.000124519	0.880768	2.42371	2.75182	78.5	87.3	75.8	55.3	77.4	69.1	52.1	62.9	210.6	163.1	158.8	187.1
1427015_at	Nckap5l	BI732921	0.173236	0.0320446	0.00234294	0.615856	1.6947	2.75178	77.4	32.6	75.2	43.1	12	50.7	32.9	45	103.5	81.9	83.3	118.2
[truncated: 2,051 more rows]

## Sheet: Microarray-UP_KEGG
Up-regulated gene_KEGG pathway (Pvalue<0.05)
Category	Term	Count	%	PValue	Genes	List Total	Pop Hits	Pop Total	Fold Enrichment	Bonferroni	Benjamini	FDR
KEGG_PATHWAY	mmu04668:TNF signaling pathway	49	1.88897	1.82036e-14	TRADD, PIK3CD, TNFAIP3, CXCL1, CXCL3, CXCL2, CX3CL1, PIK3CG, ICAM1, CASP7, CASP8, CREB3L3, CREB3L1, CASP3, CREB3L2, JUNB, RIPK3, MMP3, TRAF1, FOS, TNFRSF1B, MMP9, CREB3, MMP14, IL1B, BIRC3, CCL12, PIK3R3, PTGS2, PIK3R5, SOCS3, CCL5, CCL2, RIPK1, JUN, VCAM1, MLKL, CCL20, LIF, IFI47, SELE, NFKB1, NFKBIA, CXCL10, IL6, BCL3, FAS, MAP3K14, IL18R1	1080	109	7691	3.20132	5.07994e-12	5.07881e-12	3.87737e-12
KEGG_PATHWAY	mmu04062:Chemokine signaling pathway	69	2.65998	1.20755e-13	ITK, CXCL9, PIK3CD, CXCL1, ARRB2, CXCL3, CXCL14, CXCL2, CXCL5, CX3CL1, PIK3CG, CXCL16, GNGT2, RAC2, CCR9, CCR7, CCR6, CCR5, JAK3, CCR2, PRKCD, VAV1, VAV2, FGR, HCK, XCL1, DOCK2, CCL12, SRC, SHC1, ADCY4, WAS, PIK3R3, ADCY3, CXCR4, CXCR6, ADCY7, PIK3R5, GNAI2, CCL21C, PAK1, CCL9, GNG10, CCL8, GNG2, CCL7, CCL6, GNG4, CCL5, CCL4, CXCR2, CCL3, PTK2B, CCL2, CCL19, CCL21A, CCL21B, LYN, CCR1, CCL22, CCL2…	1080	196	7691	2.50699	3.3701e-11	1.68454e-11	1.28604e-11
KEGG_PATHWAY	mmu04380:Osteoclast differentiation	50	1.92753	2.96388e-12	SIRPB1B, SIRPB1A, NCF2, ITGB3, NCF4, FHL2, PIK3CD, TREM2, PIK3CG, LOC100038947, CTSK, ACP5, TNFSF11, SIRPA, JUNB, IFNAR2, IL1R1, CYBA, FOS, OSCAR, FCGR1, FCGR3, TYROBP, LCK, FCGR4, IL1B, BTK, LCP2, IRF9, IFNAR1, LILRA6, PIK3R3, TNFRSF11A, PIK3R5, RELB, SOCS3, SOCS1, PLCG2, JUN, STAT1, NFATC1, NFKB1, FOSL2, NFKB2, FOSL1, NFKBIA, CAMK4, FOSB, FCGR2B, MAP3K14	1080	126	7691	2.82591	8.26915e-10	2.7564e-10	2.10435e-10
KEGG_PATHWAY	mmu04060:Cytokine-cytokine receptor interaction	75	2.89129	1.29201e-11	CXCL9, CSF3, CSF3R, TNFRSF13B, CXCL1, CXCL14, CXCL2, CXCL5, CX3CL1, CXCL16, IL18RAP, TNFSF10, CCR9, TNFSF11, CCR7, CCR6, CCR5, IL13RA1, CCR2, IFNAR2, IL1R1, TNFRSF18, IL1R2, TNFRSF1B, OSMR, IL17RA, CSF2RB2, IL1B, IL3RA, XCL1, LTB, IL6ST, IFNAR1, CCL12, IL20RA, IL4RA, CXCR4, CSF2RB, CXCR6, TNFRSF11A, IL2RG, CSF2RA, CCL21C, CCL9, CCL8, CCL7, CCL6, CCL5, CCL4, CXCR2, CCL3, IL21R, CCL2, CCL19, CCL21A…	1080	242	7691	2.20701	3.60471e-09	9.01174e-10	6.87993e-10
KEGG_PATHWAY	mmu04064:NF-kappa B signaling pathway	41	1.58057	3.55617e-11	TRADD, TNFAIP3, LY96, BCL10, TNFRSF11A, PTGS2, ICAM1, RELB, CCL21C, PLAU, CCL4, PLCG2, TRIM25, TNFSF11, RIPK1, BCL2A1D, CCL19, CD14, BCL2A1A, BCL2A1B, CCL21A, CCL21B, LYN, VCAM1, TNFSF14, IL1R1, DDX58, IRAK4, TRAF1, TICAM1, NFKB1, NFKB2, NFKBIA, CXCL12, LCK, IL1B, BTK, LTB, MAP3K14, MYD88, BIRC3	1080	97	7691	3.01003	9.92174e-09	1.98434e-09	1.51493e-09
KEGG_PATHWAY	mmu04142:Lysosome	47	1.81187	4.87412e-11	HEXB, GBA, CTSZ, HEXA, CTSW, TCIRG1, LITAF, GNS, LIPA, CTSS, GM2A, NAGLU, GNPTAB, CTSK, PSAP, ACP5, CTSH, AP1S1, ACP2, AP3S1, GUSB, CTSD, CTSC, ARSB, CTSB, CTSA, HGSNAT, ARSA, NAPSA, ATP6V0B, GAA, SLC11A1, LAPTM5, M6PR, NAGA, IGF2R, PLA2G15, GALNS, NPC2, GLB1, PPT1, MAN2B1, CD68, ATP6V0C, GLA, ATP6V0D2, LGMN	1080	122	7691	2.74345	1.35988e-08	2.26646e-09	1.73031e-09
KEGG_PATHWAY	mmu04145:Phagosome	58	2.23593	7.64814e-11	H2-T24, H2-T23, ITGB5, NCF2, ITGB3, ITGB2, NCF4, H2-K1, TCIRG1, CTSS, MRC2, SEC61A1, TUBB6, TUBB5, TUBB3, H2-OA, SEC61B, ATP6V0B, TAP2, TAP1, CYBA, FCGR1, FCGR3, TUBB2B, TUBB2A, FCGR4, ATP6V1B2, TLR6, ITGA5, SEC22B, ATP6V0D2, ATP6V0C, H2-D1, TLR2, ATP6V1A, RAB5C, H2-Q8, H2-DMA, H2-Q6, H2-M3, H2-Q7, THBS2, CORO1A, THBS1, C3, H2-DMB2, CLEC7A, H2-DMB1, CD14, MSR1, C1RA, H2-EB1, M6PR, H2-AA, CALR, FC…	1080	171	7691	2.41541	2.13383e-08	3.04833e-09	2.32722e-09
KEGG_PATHWAY	mmu05150:Staphylococcus aureus infection	27	1.04086	2.07555e-10	C1QB, C1QA, SELPLG, H2-DMA, CFI, ITGB2, C5AR1, FPR1, FPR2, ITGAL, ICAM1, C3, H2-DMB2, H2-DMB1, C3AR1, H2-OA, C1RA, H2-EB1, H2-AA, FCGR1, SELP, FCGR3, FCGR4, MASP1, FCGR2B, CFB, H2-AB1	1080	50	7691	3.8455	5.79079e-08	7.23848e-09	5.52615e-09
KEGG_PATHWAY	mmu05323:Rheumatoid arthritis	35	1.34927	8.95772e-10	ATP6V1A, CCL12, H2-DMA, CD80, ITGB2, TNFRSF11A, TCIRG1, ITGAL, CXCL5, ICAM1, H2-DMB2, CCL5, H2-DMB1, CTSK, CCL3, CCL2, ACP5, TNFSF11, H2-OA, JUN, ATP6V0B, H2-EB1, CCL20, MMP3, FOS, H2-AA, IL6, CXCL12, IL1B, ATP6V1B2, LTB, ATP6V0C, ATP6V0D2, TLR2, H2-AB1	1080	82	7691	3.03958	2.4992e-07	2.77689e-08	2.11999e-08
KEGG_PATHWAY	mmu05168:Herpes simplex infection	63	2.42868	1.94883e-09	H2-T24, H2-T23, H2-K1, IFIT1, IFIH1, CASP8, CASP3, H2-OA, SKP2, IKBKE, IFNAR2, DDX58, TAP2, TAP1, TRAF1, FOS, TICAM1, OAS2, EEF1D, IL1B, OAS3, IRF7, TLR3, IRF9, H2-D1, TLR2, IFNAR1, CCL12, RNASEL, H2-Q8, H2-DMA, H2-Q6, H2-M3, H2-Q7, OAS1A, OAS1B, CFP, ARNTL, C3, H2-DMB2, SOCS3, H2-DMB1, CCL5, CCL2, GM4340, CD74, JUN, H2-EB1, TNFSF14, STAT1, EIF2AK2, PILRA, H2-AA, NFKB1, NFKBIA, PER1, IL6, TRP53, …	1080	208	7691	2.15693	5.43724e-07	5.43724e-08	4.15101e-08
KEGG_PATHWAY	mmu05164:Influenza A	55	2.12028	2.2817e-09	CIITA, NXT1, PIK3CD, ADAR, PIK3CG, ICAM1, PYCARD, IFIH1, CASP9, TNFSF10, CASP1, TRIM25, H2-OA, KPNA2, IKBKE, IFNAR2, RSAD2, DDX58, PRKCB, IRAK4, TICAM1, OAS2, IL1B, OAS3, IRF7, TLR3, IRF9, IFNAR1, CCL12, RNASEL, H2-DMA, PIK3R3, OAS1A, OAS1B, PIK3R5, H2-DMB2, SOCS3, H2-DMB1, CCL5, CCL2, NLRP3, IL33, HSPA8, JUN, H2-EB1, STAT1, EIF2AK2, H2-AA, NFKB1, NFKBIA, CXCL10, IL6, FAS, MYD88, H2-AB1	1080	171	7691	2.29048	6.36595e-07	5.66206e-08	4.32265e-08
KEGG_PATHWAY	mmu04650:Natural killer cell mediated cytotoxicity	40	1.54202	2.4353e-09	SHC1, ITGB2, ICAM2, PIK3CD, PIK3R3, ITGAL, PIK3CG, PIK3R5, ICAM1, PAK1, CASP3, SH3BP2, TNFSF10, PLCG2, RAC2, RAC3, PTK2B, BID, IFNAR2, FCER1G, PRKCB, GZMB, NFATC1, RAET1B, VAV1, RAET1A, VAV2, RAET1D, RAET1C, TYROBP, RAET1E, LCK, FCGR4, FAS, PTPN6, KLRD1, CD48, LCP2, CD244, IFNAR1	1080	105	7691	2.71287	6.79447e-07	5.66206e-08	4.32265e-08
KEGG_PATHWAY	mmu04514:Cell adhesion molecules (CAMs)	52	2.00463	7.2023e-09	H2-T24, H2-T23, CD80, ITGB2, H2-K1, ICAM2, LRRC4, ITGAL, CLDN2, PVR, ICAM1, CDH5, ALCAM, CDH2, ITGB7, H2-OA, ITGA4, CD8B1, VCAN, CLDN13, PECAM1, H2-D1, CD274, NLGN2, SELPLG, H2-Q8, H2-DMA, H2-Q6, H2-M3, H2-Q7, SDC3, H2-DMB2, H2-DMB1, NCAM1, ICOS, MPZL1, CD276, H2-EB1, VCAM1, GLYCAM1, H2-AA, SELE, SELP, NFASC, PTPRC, SELL, SDC1, CNTN2, ESAM, H2-Q10, CD22, H2-AB1	1080	162	7691	2.28585	2.00944e-06	1.54573e-07	1.18007e-07
KEGG_PATHWAY	mmu05166:HTLV-I infection	75	2.89129	9.6179e-09	H2-T24, H2-T23, ITGB2, H2-K1, PIK3CD, BUB1B, CD3G, ITGAL, ETS1, CD3D, PIK3CG, ICAM1, CDC20, CCND3, ZFP36, CHEK2, MYC, CHEK1, H2-OA, JAK3, PDGFRB, WNT5B, IL1R1, IL1R2, WNT5A, FOS, LCK, SLC25A5, ATF3, H2-D1, H2-Q8, H2-DMA, H2-Q6, H2-M3, H2-Q7, ADCY4, CREM, PIK3R3, ADCY3, IL2RG, ADCY7, PIK3R5, RELB, H2-DMB2, TERT, H2-DMB1, E2F1, E2F2, FZD1, RANBP1, EGR1, CDKN2B, JUN, H2-EB1, FZD2, VCAM1, FZD6, NFATC…	1080	276	7691	1.93513	2.68339e-06	1.91671e-07	1.46329e-07
KEGG_PATHWAY	mmu05161:Hepatitis B	48	1.85042	1.28073e-08	SRC, PTEN, PIK3CD, PIK3R3, PIK3CG, PIK3R5, CASP9, IFIH1, CASP12, CASP8, CREB3L3, MYC, CASP3, CREB3L1, CREB3L2, STAT4, E2F1, E2F2, PTK2B, IKBKE, JUN, EGR3, APAF1, STAT1, DDX58, PRKCB, STAT3, NFATC1, FOS, TICAM1, MMP9, NFKB1, NFATC4, CCNA2, NFKBIA, CREB3, IL6, CDK6, CDK4, CCNE1, TRP53, IRF7, FAS, BIRC5, TLR3, MYD88, TLR2, IFNAR1	1080	146	7691	2.34125	3.57322e-06	2.38215e-07	1.81863e-07
KEGG_PATHWAY	mmu05140:Leishmaniasis	28	1.07941	3.147e-08	NCF2, H2-DMA, ITGB2, NCF4, PTGS2, C3, H2-DMB2, H2-DMB1, H2-OA, MARCKSL1, JUN, H2-EB1, ITGA4, STAT1, CYBA, FOS, IRAK4, H2-AA, NFKB1, FCGR1, NFKBIA, FCGR3, FCGR4, IL1B, PTPN6, MYD88, TLR2, H2-AB1	1080	64	7691	3.11557	8.7801e-06	5.3989e-07	4.12174e-07
KEGG_PATHWAY	mmu04666:Fc gamma R-mediated phagocytosis	33	1.27217	3.28965e-08	ARPC1B, WAS, ASAP3, PIK3CD, PIK3R3, PIK3CG, PIK3R5, PAK1, INPP5D, CFL1, PLCG2, RAC2, PIP5K1C, LYN, VASP, MARCKSL1, MYO10, SPHK2, PRKCB, SPHK1, PRKCD, ARPC4, VAV1, VAV2, FCGR1, HCK, MARCKS, PTPRC, ARPC2, ARPC3, DOCK2, FCGR2B, ARF6	1080	84	7691	2.79765	9.17809e-06	5.3989e-07	4.12174e-07
KEGG_PATHWAY	mmu05152:Tuberculosis	53	2.04318	5.54877e-08	CIITA, TRADD, ITGB2, TCIRG1, LSP1, CTSS, CASP9, MRC2, CASP8, CASP3, ITGAX, H2-OA, CTSD, ATP6V0B, FCER1G, APAF1, SPHK2, SPHK1, IRAK4, TLR1, FCGR1, FCGR3, FCGR4, IL1B, TLR6, CLEC4E, ATP6V0D2, ATP6V0C, TLR2, RAB5C, SRC, H2-DMA, BCL10, CORO1A, C3, H2-DMB2, CLEC7A, H2-DMB1, CD14, BID, CD74, PLK3, H2-EB1, IL10RB, VDR, STAT1, IL10RA, H2-AA, NFKB1, IL6, FCGR2B, MYD88, H2-AB1	1080	176	7691	2.14448	1.54809e-05	8.60059e-07	6.56604e-07
KEGG_PATHWAY	mmu04612:Antigen processing and presentation	31	1.19507	2.51814e-07	H2-T24, H2-T23, CIITA, H2-Q8, H2-DMA, H2-Q6, H2-M3, H2-Q7, H2-K1, IFI30, CTSS, H2-DMB2, H2-DMB1, H2-OA, B2M, CTSB, PDIA3, CD74, HSPA8, HSP90AA1, H2-EB1, TAP2, TAP1, CD8B1, H2-AA, KLRD1, CALR, H2-Q10, H2-D1, LGMN, H2-AB1	1080	82	7691	2.6922	7.02537e-05	3.69769e-06	2.82297e-06
KEGG_PATHWAY	mmu04115:p53 signaling pathway	27	1.04086	4.18021e-07	SERPINE1, PTEN, THBS1, CASP9, CCNB2, CCND3, CCNB1, CASP8, SESN3, CHEK2, CASP3, SESN2, CHEK1, BID, GTSE1, RPRM, RRM2, APAF1, SHISA5, IGF1, GADD45G, CDK6, CDK4, CCNE1, TRP53, CDK1, FAS	1080	67	7691	2.86978	0.000116621	5.83139e-06	4.45192e-06
KEGG_PATHWAY	mmu04151:PI3K-Akt signaling pathway	84	3.23824	5.24916e-07	CSF3, CSF3R, ITGB5, ITGB3, PTEN, TNC, PIK3CD, BRCA1, PIK3CG, CASP9, CCND3, FGF7, GNGT2, IBSP, CREB3L3, TNN, CREB3L1, MYC, CREB3L2, KDR, TNR, ITGB7, JAK3, PDGFRB, IFNAR2, HSP90AA1, COL27A1, ITGA4, HGF, ITGA1, PPP2R5C, OSMR, CREB3, COL2A1, COL4A2, COL4A1, CCNE1, COL6A2, IL3RA, DDIT4, COL6A3, ITGA5, EIF4E2, TLR2, IFNAR1, LAMA4, COL11A1, COL11A2, IL4RA, PIK3R3, LPAR4, IL2RG, THBS2, THBS1, EFNA4, PIK3…	1080	351	7691	1.70424	0.000146441	6.97389e-06	5.32415e-06
KEGG_PATHWAY	mmu05162:Measles	42	1.61912	7.92064e-07	OAS1A, PIK3CD, PIK3R3, TNFAIP3, CD3G, OAS1B, ADAR, IL2RG, CD3D, PIK3CG, PIK3R5, IFIH1, CCND3, TNFSF10, JAK3, IKBKE, IFNAR2, HSPA8, STAT1, DDX58, STAT3, EIF2AK2, IRAK4, NFKB1, NFKBIA, DOK1, IL6, CDK6, OAS2, CDK4, CCNE1, OAS3, TRP53, IL1B, IL2RB, IRF7, FAS, FCGR2B, IRF9, MYD88, TLR2, IFNAR1	1080	136	7691	2.19922	0.000220961	1.00448e-05	7.66862e-06
KEGG_PATHWAY	mmu05134:Legionellosis	24	0.925212	8.61733e-07	HSPA8, APAF1, ITGB2, CXCL1, CXCL3, CXCL2, NFKB1, NFKB2, PYCARD, C3, CASP9, NFKBIA, NAIP2, IL6, CASP7, NAIP5, CASP8, CASP3, IL1B, CASP1, CD14, SEC22B, MYD88, TLR2	1080	57	7691	2.99844	0.000240395	1.04532e-05	7.9804e-06
KEGG_PATHWAY	mmu04512:ECM-receptor interaction	31	1.19507	1.44302e-06	ITGB5, LAMA4, COL11A1, ITGB3, COL11A2, TNC, HMMR, THBS2, THBS1, IBSP, TNN, TNR, ITGB7, COL27A1, ITGA4, ITGA1, FN1, COL3A1, COL2A1, COL1A2, COL4A2, COL5A1, COL4A1, COL6A2, COL5A3, COL5A2, COL6A3, SDC1, ITGA5, AGRN, CD44	1080	88	7691	2.50864	0.000402522	1.67751e-05	1.28068e-05
KEGG_PATHWAY	mmu04210:Apoptosis	24	0.925212	2.49022e-06	APAF1, TRADD, PIK3CD, PIK3R3, CSF2RB, PIK3CG, NFKB1, PIK3R5, CASP9, NFKBIA, CSF2RB2, CASP7, CASP12, CASP8, CASP6, TRP53, CASP3, IL3RA, TNFSF10, FAS, RIPK1, BID, MAP3K14, BIRC3	1080	60	7691	2.84852	0.00069453	2.77908e-05	2.12167e-05
KEGG_PATHWAY	mmu05200:Pathways in cancer	89	3.43099	3.4976e-06	CSF3R, FLT3, PTEN, PIK3CD, GLI3, PIK3CG, CKS1B, CASP9, EDNRA, FGF7, CASP8, GNGT2, MECOM, MYC, CASP3, RASSF5, RAC2, BDKRB2, RAC3, BDKRB1, SKP2, PDGFRB, HSP90AA1, WNT5B, TPM3, PRKCB, HGF, MMP2, WNT5A, TRAF1, FOS, MMP9, AGTR1A, RUNX1, TRAF4, COL4A2, COL4A1, CCNE1, CKS2, BIRC5, BIRC3, PTGER4, RALB, LAMA4, TCF7, ADCY4, PIK3R3, ADCY3, CXCR4, LPAR4, PTGS2, HIF1A, CSF2RA, RASGRP1, ADCY7, RASGRP4, PIK3R5,…	1080	395	7691	1.60455	0.000975355	3.68184e-05	2.81086e-05
KEGG_PATHWAY	mmu04110:Cell cycle	38	1.46492	3.56307e-06	CDKN1C, MCM7, BUB1B, TTK, CDC20, CCNB2, CCND3, CCNB1, CHEK2, MYC, CHEK1, E2F1, E2F2, SKP2, BUB1, CDKN2B, PLK1, CDC7, CDC6, CDC25C, GADD45G, CCNA2, CDK7, RBL1, DBF4, CDK6, ESPL1, CDK4, CCNE1, TRP53, CDC16, CDK1, MCM3, MCM4, MCM5, MCM6, MCM2, MAD2L1	1080	124	7691	2.18233	0.000993604	3.68184e-05	2.81086e-05
KEGG_PATHWAY	mmu04620:Toll-like receptor signaling pathway	33	1.27217	3.97023e-06	CXCL9, CD80, PIK3CD, PIK3R3, LY96, PIK3CG, PIK3R5, CASP8, CCL5, CTSK, CCL4, CCL3, RIPK1, CD14, IKBKE, IFNAR2, JUN, STAT1, FOS, IRAK4, TICAM1, NFKB1, TLR1, NFKBIA, CXCL10, IL6, IL1B, IRF7, TLR6, TLR3, MYD88, TLR2, IFNAR1	1080	101	7691	2.32676	0.00110708	3.95606e-05	3.02021e-05
KEGG_PATHWAY	mmu04510:Focal adhesion	54	2.08173	5.65611e-06	ITGB5, ITGB3, PTEN, TNC, PIK3CD, PIK3CG, CCND3, IBSP, TNN, RAC2, KDR, RAC3, TNR, ITGB7, PDGFRB, COL27A1, ITGA4, PRKCB, HGF, ACTN1, ITGA1, VAV1, VAV2, COL2A1, COL4A2, COL4A1, COL6A2, COL6A3, ITGA5, BIRC3, SRC, SHC1, LAMA4, COL11A1, COL11A2, PIK3R3, THBS2, THBS1, PIK3R5, PAK1, PDGFC, PAK3, VASP, JUN, FN1, PARVA, IGF1, COL3A1, COL1A2, COL5A1, PARVG, COL5A3, COL5A2, ZYX	1080	207	7691	1.85773	0.00157681	5.44156e-05	4.15431e-05
KEGG_PATHWAY	mmu05146:Amoebiasis	36	1.38782	6.11015e-06	RAB5C, LAMA4, COL11A1, COL11A2, ITGB2, PIK3CD, PIK3R3, PIK3CG, PIK3R5, SERPINB1B, CASP3, SERPINB9B, CD14, ARG2, COL27A1, ARG1, IL1R1, PRKCB, ACTN1, IL1R2, FN1, SERPINB9, NFKB1, IL6, COL3A1, COL2A1, GNAL, COL1A2, COL4A2, COL5A1, COL4A1, COL5A3, IL1B, COL5A2, GNAS, TLR2	1080	117	7691	2.19117	0.00170328	5.68244e-05	4.3382e-05
KEGG_PATHWAY	mmu05332:Graft-versus-host disease	21	0.809561	1.05868e-05	H2-T24, H2-T23, H2-EB1, H2-Q8, CD80, H2-DMA, H2-Q6, H2-Q7, H2-M3, H2-K1, GZMB, H2-AA, H2-DMB2, IL6, IL1B, H2-DMB1, FAS, H2-OA, H2-D1, H2-Q10, H2-AB1	1080	52	7691	2.87591	0.00294937	9.52812e-05	7.27415e-05
KEGG_PATHWAY	mmu04662:B cell receptor signaling pathway	25	0.963763	1.44171e-05	DAPP1, PIK3CD, PIK3R3, BCL10, PIK3CG, PIK3R5, INPP5D, PLCG2, RAC2, RAC3, LYN, JUN, CD72, NFATC1, FOS, NFKB1, VAV1, VAV2, NFKBIA, BTK, PTPN6, PIK3AP1, FCGR2B, NFKBIE, CD22	1080	70	7691	2.54332	0.00401431	0.000121982	9.31263e-05
KEGG_PATHWAY	mmu04974:Protein digestion and absorption	29	1.11796	1.4428e-05	COL18A1, COL15A1, COL14A1, COL11A1, ELN, COL11A2, COL12A1, ATP1A3, PRCP, SLC3A2, SLC8A1, KCNN4, CPA2, COL27A1, MME, COL3A1, COL2A1, COL1A2, SLC7A7, COL4A2, COL5A1, SLC7A8, COL4A1, FXYD2, COL6A2, COL5A3, COL5A2, COL6A3, COL9A2	1080	88	7691	2.34679	0.00401735	0.000121982	9.31263e-05
KEGG_PATHWAY	mmu05222:Small cell lung cancer	28	1.07941	1.66168e-05	LAMA4, PTEN, PIK3CD, PIK3R3, PTGS2, PIK3CG, PIK3R5, CKS1B, CASP9, MYC, E2F1, E2F2, SKP2, CDKN2B, APAF1, FN1, TRAF1, NFKB1, NFKBIA, CDK6, TRAF4, COL4A2, CDK4, COL4A1, CCNE1, TRP53, CKS2, BIRC3	1080	84	7691	2.37377	0.0046254	0.000136356	0.0001041
KEGG_PATHWAY	mmu05142:Chagas disease (American trypanosomiasis)	32	1.23362	1.79569e-05	C1QB, C1QA, CCL12, SERPINE1, PIK3CD, PIK3R3, CD3G, CD3D, PIK3CG, PIK3R5, GNAI2, C3, CASP8, CCL5, CCL3, BDKRB2, CCL2, JUN, FOS, IRAK4, TICAM1, NFKB1, NFKBIA, IL6, GNAL, IL1B, GNAS, FAS, TLR6, CALR, MYD88, TLR2	1080	103	7691	2.21244	0.0049975	0.000143142	0.000109281
KEGG_PATHWAY	mmu04630:Jak-STAT signaling pathway	40	1.54202	2.93971e-05	CSF3, CSF3R, IL20RA, IL4RA, PIK3CD, PIK3R3, CSF2RB, IL2RG, CSF2RA, PIK3CG, PIK3R5, SOCS2, SOCS3, CCND3, SOCS1, MYC, PIM1, IL21R, STAT4, IL13RA2, JAK3, IL13RA1, IFNAR2, IL10RB, STAT1, IL10RA, STAT3, OSM, LIF, OSMR, CSF2RB2, IL6, IL2RB, IL3RA, PTPN6, IL6ST, IL7R, IRF9, IFNAR1, CRLF2	1080	145	7691	1.9645	0.00816838	0.000226687	0.000173062
KEGG_PATHWAY	mmu03030:DNA replication	16	0.616808	3.00624e-05	RFC5, PRIM2, FEN1, RFC3, MCM7, LIG1, RFC2, PRIM1, POLA1, POLE2, MCM3, MCM4, MCM5, MCM6, DNA2, MCM2	1080	35	7691	3.25545	0.00835247	0.000226687	0.000173062
KEGG_PATHWAY	mmu05169:Epstein-Barr virus infection	38	1.46492	3.57041e-05	H2-T24, H2-T23, H2-Q8, H2-Q6, TRADD, H2-M3, H2-Q7, H2-K1, PIK3CD, PIK3R3, TNFAIP3, ITGAL, PIK3CG, PIK3R5, ICAM1, RELB, MYC, PLCG2, RIPK1, SKP2, JAK3, LYN, ENTPD1, JUN, ENTPD3, DDX58, STAT3, EIF2AK2, NFKB1, NFKB2, CCNA2, NFKBIA, TRP53, NFKBIE, MAP3K14, CD44, H2-Q10, H2-D1	1080	136	7691	1.98977	0.00991217	0.000257517	0.000196599
KEGG_PATHWAY	mmu00531:Glycosaminoglycan degradation	12	0.462606	3.5997e-05	GALNS, HGSNAT, NAGLU, GLB1, HYAL2, HEXB, HEXA, HPSE, GUSB, GNS, SPAM1, ARSB	1080	21	7691	4.06931	0.00999307	0.000257517	0.000196599
KEGG_PATHWAY	mmu05133:Pertussis	25	0.963763	4.11095e-05	C1QB, C1QA, ITGB2, LY96, CXCL5, GNAI2, PYCARD, C3, CASP7, CASP3, CFL1, CASP1, NLRP3, CD14, JUN, C1RA, FOS, IRAK4, TICAM1, NFKB1, IL6, IL1B, IRF8, ITGA5, MYD88	1080	74	7691	2.40584	0.0114042	0.000286738	0.000218908
KEGG_PATHWAY	mmu05416:Viral myocarditis	26	1.00231	4.55087e-05	H2-T24, H2-T23, H2-Q8, H2-DMA, H2-Q6, CD80, H2-M3, ITGB2, H2-Q7, H2-K1, ITGAL, ICAM1, CASP9, H2-DMB2, CASP8, CASP3, H2-DMB1, RAC2, RAC3, H2-OA, BID, H2-EB1, H2-AA, H2-Q10, H2-D1, H2-AB1	1080	79	7691	2.34372	0.0126169	0.000309681	0.000236423
KEGG_PATHWAY	mmu04670:Leukocyte transendothelial migration	34	1.31072	5.14062e-05	ITK, NCF2, ITGB2, NCF4, PIK3CD, PIK3R3, CXCR4, THY1, CLDN2, ITGAL, PIK3CG, PIK3R5, GNAI2, ICAM1, CDH5, RASSF5, PLCG2, RAC2, PTK2B, VASP, VCAM1, ITGA4, PRKCB, ACTN1, MMP2, CYBA, MMP9, VAV1, VAV2, CXCL12, CLDN13, PECAM1, ESAM, SIPA1	1080	118	7691	2.0519	0.0142403	0.000341484	0.000260703
KEGG_PATHWAY	mmu04640:Hematopoietic cell lineage	27	1.04086	6.18541e-05	CSF3, CSF3R, FLT3, ITGB3, IL4RA, CD3G, CD3D, CSF2RA, ANPEP, CD38, CD37, CD14, H2-EB1, ITGA4, MME, IL1R1, IL1R2, ITGA1, CD8B1, FCGR1, IL6, IL1B, IL3RA, ITGA5, IL7R, CD22, CD44	1080	85	7691	2.26206	0.0171098	0.000401332	0.000306394
KEGG_PATHWAY	mmu05203:Viral carcinogenesis	55	2.12028	7.32276e-05	H2-T24, H2-T23, TRADD, H2-K1, PIK3CD, PIK3CG, CDC20, CCND3, CASP8, CREB3L3, CREB3L1, CASP3, CREB3L2, CHEK1, SKP2, CCR5, JAK3, ACTN1, TRAF1, SND1, CCNA2, CREB3, RBL1, CCNE1, IRF7, IL6ST, ATP6V0D2, IRF9, H2-D1, H2-Q8, SRC, H2-Q6, H2-M3, H2-Q7, PIK3R3, GTF2E2, PIK3R5, C3, BAK1, LYN, RANBP1, CDKN2B, JUN, EGR3, STAT3, EIF2AK2, NFKB1, NFKB2, NFKBIA, CDK6, CDK4, TRP53, REL, CDK1, H2-Q10	1080	231	7691	1.69555	0.0202239	0.00046433	0.000354488
KEGG_PATHWAY	mmu05321:Inflammatory bowel disease (IBD)	21	0.809561	8.85637e-05	H2-EB1, JUN, STAT1, H2-DMA, STAT3, IL4RA, NFATC1, IL2RG, H2-AA, NFKB1, H2-DMB2, IL6, IL18RAP, IL1B, H2-DMB1, STAT4, IL21R, H2-OA, IL18R1, H2-AB1, TLR2	1080	59	7691	2.5347	0.0244076	0.000549095	0.000419201
KEGG_PATHWAY	mmu04672:Intestinal immune network for IgA production	17	0.655359	9.22889e-05	H2-EB1, ITGA4, TNFRSF13B, CD80, H2-DMA, CXCR4, H2-AA, H2-DMB2, IL6, CXCL12, H2-DMB1, CCR9, ITGB7, H2-OA, ICOS, MAP3K14, H2-AB1	1080	42	7691	2.88243	0.0254211	0.000558724	0.000426553
KEGG_PATHWAY	mmu05340:Primary immunodeficiency	15	0.578258	9.41219e-05	CIITA, DCLRE1C, TNFRSF13B, TAP2, TAP1, CD8B1, IL2RG, CD3D, UNG, PTPRC, LCK, BTK, IL7R, ICOS, ADA	1080	34	7691	3.14175	0.0259194	0.000558724	0.000426553
KEGG_PATHWAY	mmu00532:Glycosaminoglycan biosynthesis - chondroitin sulfate / dermatan sulfate	11	0.424056	0.000137137	CSGALNACT1, CHST7, CHPF, CHSY1, CHST11, CHPF2, XYLT2, CHST13, B3GALT6, CHSY3, CHST14	1080	20	7691	3.91671	0.0375411	0.00079711	0.000608546
KEGG_PATHWAY	mmu05144:Malaria	18	0.693909	0.000161103	CCL12, CSF3, VCAM1, HGF, ITGB2, THBS2, ITGAL, THBS1, SELE, ICAM1, SELP, IL6, IL1B, PECAM1, CCL2, SDC1, MYD88, TLR2	1080	48	7691	2.67049	0.0439559	0.000917299	0.000700303
KEGG_PATHWAY	mmu04621:NOD-like receptor signaling pathway	20	0.77101	0.000170341	CCL12, HSP90AA1, TNFAIP3, CXCL1, MEFV, CXCL2, NFKB1, PYCARD, NFKBIA, NAIP2, PSTPIP1, IL6, NAIP5, CASP8, IL1B, CCL5, CASP1, CCL2, NLRP3, BIRC3	1080	57	7691	2.4987	0.0464173	0.000950502	0.000725652
KEGG_PATHWAY	mmu05330:Allograft rejection	19	0.73246	0.000417522	H2-T24, H2-T23, H2-EB1, H2-Q8, CD80, H2-DMA, H2-Q6, H2-Q7, H2-M3, H2-K1, GZMB, H2-AA, H2-DMB2, H2-DMB1, FAS, H2-OA, H2-D1, H2-Q10, H2-AB1	1080	56	7691	2.41615	0.109981	0.00228409	0.00174377
KEGG_PATHWAY	mmu04978:Mineral absorption	15	0.578258	0.000515594	VDR, SLC31A1, SLC40A1, ATP1A3, CYBRD1, MT2, MT1, ATOX1, FTL1, FXYD2, HMOX1, STEAP1, STEAP2, TRPM6, SLC39A4	1080	39	7691	2.73896	0.134015	0.00276636	0.00211195
KEGG_PATHWAY	mmu04940:Type I diabetes mellitus	20	0.77101	0.000573235	H2-T24, H2-T23, H2-EB1, H2-Q8, CD80, H2-DMA, H2-Q6, H2-Q7, H2-M3, H2-K1, GZMB, H2-AA, H2-DMB2, IL1B, H2-DMB1, FAS, H2-OA, H2-D1, H2-Q10, H2-AB1	1080	62	7691	2.29719	0.147838	0.00301759	0.00230375
KEGG_PATHWAY	mmu05145:Toxoplasmosis	28	1.07941	0.0010195	CIITA, LAMA4, H2-DMA, LY96, GNAI2, CASP9, H2-DMB2, CASP8, SOCS1, CASP3, H2-DMB1, H2-OA, CCR5, HSPA8, H2-EB1, IL10RB, STAT1, IL10RA, STAT3, IRGM1, IRAK4, H2-AA, NFKB1, NFKBIA, MYD88, BIRC3, TLR2, H2-AB1	1080	105	7691	1.89901	0.247674	0.0052674	0.00402135
KEGG_PATHWAY	mmu04660:T cell receptor signaling pathway	27	1.04086	0.00123212	ITK, PIK3CD, PIK3R3, CD3G, BCL10, CD3D, RASGRP1, PIK3CG, PIK3R5, PAK1, ICOS, PAK3, JUN, CD8B1, NFATC1, FOS, NFKB1, VAV1, VAV2, NFKBIA, PTPRC, CDK4, LCK, PTPN6, LCP2, NFKBIE, MAP3K14	1080	101	7691	1.90371	0.291052	0.0062502	0.00477166
KEGG_PATHWAY	mmu00520:Amino sugar and nucleotide sugar metabolism	16	0.616808	0.00214865	HEXB, HEXA, GFPT1, NPL, RENBP, GMPPB, HK3, GALE, GNPDA1, GMDS, AMDHD2, UAP1L1, PGM3, NANS, PGM1, GALK1	1080	49	7691	2.32532	0.451253	0.0107049	0.00817253
KEGG_PATHWAY	mmu00240:Pyrimidine metabolism	26	1.00231	0.00234935	PRIM2, CDA, DTYMK, PNP2, PRIM1, TYMS, NT5C, PNP, TK1, UPP1, ENTPD1, RRM1, DUT, RRM2, ENTPD3, CAD, NME4, CTPS, DCK, NME1, DCTD, POLA1, UCK2, NME7, POLE2, UMPS	1080	100	7691	1.85154	0.481201	0.0113327	0.00865181
KEGG_PATHWAY	mmu04623:Cytosolic DNA-sensing pathway	19	0.73246	0.00235589	ZBP1, IL33, RIPK3, DDX58, TREX1, ADAR, TMEM173, NFKB1, PYCARD, NFKBIA, CXCL10, IL6, IL1B, CCL5, CCL4, CASP1, IRF7, RIPK1, IKBKE	1080	64	7691	2.11413	0.48215	0.0113327	0.00865181
KEGG_PATHWAY	mmu04610:Complement and coagulation cascades	21	0.809561	0.00328517	C1QB, C1QA, C1RA, F10, SERPIND1, PROS1, SERPINE1, C5AR1, CFI, PLAUR, TFPI, KNG1, F5, C3, F7, PLAU, C3AR1, BDKRB2, BDKRB1, MASP1, CFB	1080	76	7691	1.96773	0.600712	0.015535	0.01186
KEGG_PATHWAY	mmu04360:Axon guidance	30	1.15652	0.00590709	LRRC4, CXCR4, EFNA4, RND1, GNAI2, NTN3, ROBO1, PAK1, RGS3, CFL1, RAC2, RAC3, SLIT2, PLXNC1, EPHB2, PAK3, EPHB3, SEMA6B, SEMA4A, SEMA4D, SEMA4B, SEMA4F, UNC5C, RHOD, NFATC4, EFNA2, CXCL12, FES, PLXNB2, EPHA3	1080	129	7691	1.65612	0.808519	0.0272514	0.0208048
KEGG_PATHWAY	mmu00510:N-Glycan biosynthesis	15	0.578258	0.00595818	B4GALT2, ALG8, B4GALT1, RPN2, RPN1, ALG14, MOGS, DDOST, GANAB, MAN1A2, MAN2A1, MGAT5, STT3A, MAN1C1, MGAT2	1080	49	7691	2.17999	0.811245	0.0272514	0.0208048
KEGG_PATHWAY	mmu04611:Platelet activation	30	1.15652	0.00739085	SRC, COL11A1, ITGB3, COL11A2, ADCY4, PIK3CD, PIK3R3, ADCY3, RASGRP1, ADCY7, PIK3CG, PIK3R5, GNAI2, PLCG2, PRKG2, LYN, VASP, COL27A1, FCER1G, PLA2G4A, COL3A1, COL2A1, COL1A2, COL5A1, COL5A3, COL5A2, BTK, GNAS, LCP2, FERMT3	1080	131	7691	1.63083	0.873777	0.0332588	0.0253911
KEGG_PATHWAY	mmu05320:Autoimmune thyroid disease	19	0.73246	0.00780182	H2-T24, H2-T23, H2-EB1, H2-Q8, CD80, H2-DMA, H2-Q6, H2-Q7, H2-M3, H2-K1, GZMB, H2-AA, H2-DMB2, H2-DMB1, FAS, H2-OA, H2-D1, H2-Q10, H2-AB1	1080	71	7691	1.9057	0.88755	0.0345509	0.0263776
KEGG_PATHWAY	mmu05215:Prostate cancer	22	0.848111	0.00889209	PDGFRB, HSP90AA1, TCF7, PTEN, PIK3CD, PIK3R3, IGF1, PIK3CG, NFKB1, PIK3R5, CASP9, NFKBIA, CREB3, CREB3L3, CCNE1, TRP53, CREB3L1, CREB3L2, PDGFC, E2F1, E2F2, FGFR2	1080	88	7691	1.78032	0.917255	0.0387639	0.029594
KEGG_PATHWAY	mmu00052:Galactose metabolism	11	0.424056	0.00978188	B4GALT2, HK3, PFKL, GALE, B4GALT1, GLB1, GAA, GLA, PGM1, AKR1B8, GALK1	1080	32	7691	2.44795	0.935596	0.0419868	0.0320545
KEGG_PATHWAY	mmu05132:Salmonella infection	20	0.77101	0.0099712	JUN, ARPC1B, WAS, RHOG, CXCL1, ARPC4, FOS, CXCL3, CXCL2, NFKB1, PYCARD, IL6, ARPC2, ARPC3, IL1B, CCL4, CASP1, CCL3, CD14, MYD88	1080	78	7691	1.82597	0.938942	0.042151	0.0321798
KEGG_PATHWAY	mmu00604:Glycosphingolipid biosynthesis - ganglio series	7	0.269854	0.0121438	GLB1, HEXB, HEXA, B4GALNT1, ST6GALNAC4, ST3GAL1, ST6GALNAC5	1080	15	7691	3.32327	0.966921	0.0498254	0.0380388
KEGG_PATHWAY	mmu00603:Glycosphingolipid biosynthesis - globo series	7	0.269854	0.0121438	B3GALNT1, HEXB, HEXA, NAGA, A4GALT, GLA, ST3GAL1	1080	15	7691	3.32327	0.966921	0.0498254	0.0380388
KEGG_PATHWAY	mmu05212:Pancreatic cancer	17	0.655359	0.0155921	RALB, STAT1, STAT3, PIK3CD, PIK3R3, PIK3CG, NFKB1, PIK3R5, CASP9, RAD51, CDK6, CDK4, TRP53, E2F1, RAC2, RAC3, E2F2	1080	65	7691	1.86249	0.98753	0.0630461	0.048132
KEGG_PATHWAY	mmu04810:Regulation of actin cytoskeleton	42	1.61912	0.0198532	ITGB5, SRC, ARPC1B, ITGB3, ITGB2, WAS, PIK3CD, PIK3R3, ITGAE, ITGAL, IQGAP3, PIK3CG, PIK3R5, FGD3, FGF7, PAK1, CFL1, PDGFC, RAC2, ITGAX, BDKRB2, RAC3, BDKRB1, PIP4K2A, ITGB7, PIP4K2B, NCKAP1L, PIP5K1C, PAK3, PDGFRB, ITGA4, ACTN1, ITGA1, FN1, ARPC4, VAV1, VAV2, ENAH, ARPC2, ARPC3, ITGA5, FGFR2	1080	213	7691	1.4042	0.996283	0.0791292	0.0604105
KEGG_PATHWAY	mmu05160:Hepatitis C	29	1.11796	0.0218274	RNASEL, TRADD, OAS1A, PIK3CD, PIK3R3, OAS1B, CLDN2, IFIT1, PIK3CG, PIK3R5, SOCS3, RIPK1, IKBKE, IFNAR2, STAT1, DDX58, STAT3, EIF2AK2, TICAM1, NFKB1, NFKBIA, OAS2, OAS3, CLDN13, TRP53, IRF7, TLR3, IRF9, IFNAR1	1080	136	7691	1.51851	0.997882	0.085547	0.06531
KEGG_PATHWAY	mmu00601:Glycosphingolipid biosynthesis - lacto and neolacto series	9	0.346955	0.0220766	B4GALT2, B4GALT1, FUT7, B3GNT5, B3GNT3, GCNT2, ST3GAL4, B4GALT4, FUT4	1080	26	7691	2.46506	0.998027	0.085547	0.06531
KEGG_PATHWAY	mmu05205:Proteoglycans in cancer	40	1.54202	0.0233546	ITGB5, SRC, ITGB3, TWIST1, PIK3CD, PIK3R3, THBS1, HIF1A, PIK3CG, PIK3R5, PAK1, PLAU, MYC, CASP3, PLCG2, KDR, FZD1, FZD2, WNT5B, PRKCB, HGF, MMP2, WNT5A, FZD6, STAT3, PLAUR, FN1, IGF1, MMP9, COL1A2, CTTN, TRP53, FAS, SDC1, HCLS1, PTPN6, ITGA5, HPSE, CD44, TLR2	1080	203	7691	1.40321	0.99863	0.0892593	0.0681442
KEGG_PATHWAY	mmu04915:Estrogen signaling pathway	22	0.848111	0.0289166	HSPA8, JUN, HSP90AA1, SHC1, SRC, MMP2, PRKCD, ADCY4, ADCY3, PIK3CD, PIK3R3, FOS, MMP9, ADCY7, PIK3CG, PIK3R5, GNAI2, CREB3, CREB3L3, CREB3L1, CREB3L2, GNAS	1080	98	7691	1.59866	0.999722	0.109023	0.0832328
KEGG_PATHWAY	mmu00600:Sphingolipid metabolism	13	0.501157	0.0300442	ARSA, ASAH2, SPHK2, SPHK1, GBA, SGMS2, UGCG, SGPL1, SPTLC2, GLB1, ACER3, B4GALT6, GLA	1080	48	7691	1.92868	0.999799	0.110578	0.0844196
KEGG_PATHWAY	mmu04918:Thyroid hormone synthesis	17	0.655359	0.0304627	HSPA5, PRKCB, GSR, ADCY4, GPX8, GPX7, ATP1A3, ADCY3, TTF2, ADCY7, PDIA4, CREB3, CREB3L3, FXYD2, CREB3L1, CREB3L2, GNAS	1080	70	7691	1.72946	0.999822	0.110578	0.0844196
KEGG_PATHWAY	mmu04914:Progesterone-mediated oocyte maturation	20	0.77101	0.0305179	HSP90AA1, PLK1, ADCY4, ADCY3, PIK3CD, PIK3R3, IGF1, CDC25C, ADCY7, PIK3CG, PIK3R5, GNAI2, CCNA2, CCNB2, CCNB1, CDC16, RPS6KA1, CDK1, BUB1, MAD2L1	1080	87	7691	1.63708	0.999824	0.110578	0.0844196
KEGG_PATHWAY	mmu00511:Other glycan degradation	7	0.269854	0.0311144	MAN2B2, GLB1, HEXB, FUCA2, GBA, HEXA, MAN2B1	1080	18	7691	2.76939	0.999852	0.111294	0.0849663
KEGG_PATHWAY	mmu04370:VEGF signaling pathway	15	0.578258	0.0351613	SRC, SPHK2, PRKCB, SPHK1, PIK3CD, PIK3R3, PLA2G4A, PTGS2, PIK3CG, PIK3R5, CASP9, PLCG2, RAC2, KDR, RAC3	1080	60	7691	1.78032	0.999954	0.124177	0.094802
KEGG_PATHWAY	mmu04071:Sphingolipid signaling pathway	26	1.00231	0.03661	ASAH2, TRADD, PTEN, PIK3CD, PIK3R3, SGMS2, PIK3CG, PIK3R5, GNAI2, SGPL1, SPTLC2, RAC2, BDKRB2, S1PR1, RAC3, S1PR3, S1PR2, BID, CTSD, FCER1G, SPHK2, PRKCB, SPHK1, PPP2R5C, NFKB1, TRP53	1080	124	7691	1.49318	0.99997	0.127677	0.0974742
KEGG_PATHWAY	mmu04014:Ras signaling pathway	43	1.65767	0.0385565	RALB, RAB5C, SHC1, PIK3CD, PIK3R3, RASAL2, RASAL3, EFNA4, RASGRP1, ETS1, RASGRP4, PIK3CG, PIK3R5, FGF7, GNG10, PAK1, HTR7, GNG2, GNGT2, GNG4, RASSF5, PDGFC, PLCG2, RAC2, KDR, RAC3, PAK3, PDGFRB, ANGPT4, PLA2G2E, PRKCB, HGF, PLA2G4A, IGF1, GNG11, NFKB1, EFNA2, GNB1, REL, RIN1, RGL1, FGFR2, ARF6	1080	229	7691	1.33719	0.999983	0.132806	0.101389
KEGG_PATHWAY	mmu04725:Cholinergic synapse	24	0.925212	0.0396734	PRKCB, CHRNA7, ADCY4, ADCY3, PIK3CD, PIK3R3, CACNA1D, FOS, CACNA1F, GNG11, ADCY7, PIK3CG, PIK3R5, GNAI2, CREB3, GNG10, GNG2, GNGT2, CREB3L3, GNG4, CAMK4, CREB3L1, GNB1, CREB3L2	1080	113	7691	1.51249	0.999988	0.134986	0.103054
KEGG_PATHWAY	mmu05310:Asthma	8	0.308404	0.0416392	H2-DMB2, H2-EB1, FCER1G, H2-DMA, H2-DMB1, H2-OA, H2-AA, H2-AB1	1080	24	7691	2.37377	0.999993	0.139968	0.106857
KEGG_PATHWAY	mmu05223:Non-small cell lung cancer	14	0.539707	0.0430094	PRKCB, PIK3CD, PIK3R3, PIK3CG, PIK3R5, EML4, CASP9, CDK6, CDK4, TRP53, RASSF5, E2F1, PLCG2, E2F2	1080	56	7691	1.78032	0.999995	0.142853	0.10906
KEGG_PATHWAY	mmu04664:Fc epsilon RI signaling pathway	16	0.616808	0.046996	LYN, FCER1G, PRKCB, PIK3CD, PIK3R3, PLA2G4A, PIK3CG, VAV1, PIK3R5, VAV2, INPP5D, BTK, PLCG2, RAC2, RAC3, LCP2	1080	68	7691	1.6756	0.999999	0.154257	0.117766

## Sheet: Microarray-DOWN
ProbeID	Gene Symbol	GenbankID	p-value			Ratio			Data
			t-test Ctrl-L_vs_Ctrl-P	t-test CAIA_vs_Ctrl-P	t-test CAIA_vs_Ctrl-L	Ctrl-L_Av/Ctrl-P_Av	CAIA_Av/Ctrl-P_Av	CAIA_Av/Ctrl-L_Av	Ctrl-P1	Ctrl-P2	Ctrl-P3	Ctrl-P4	Ctrl-L1	Ctrl-L2	Ctrl-L3	Ctrl-L4	CAIA1	CAIA2	CAIA3	CAIA4
1427677_a_at	Sox6	AJ010605	0.26205	0.00046084	9.69173e-05	0.893297	0.446456	0.499784	418.1	415.2	301	423.3	358.1	387.7	330.6	315	191.2	150.1	162.9	191.2
1444489_at	Slc25a12	BB526231	0.98397	0.00265375	0.000160141	0.997818	0.498691	0.499781	133.3	118.8	83.6	122.5	106.7	115.1	106.8	128.6	54.2	58.8	47	68.5
1428032_at	Acvr1c	BC028780	0.593935	0.00137324	0.000530758	1.05584	0.527491	0.499593	28.3	35.3	27.1	25.7	29	36.3	30.2	27.4	12.4	18.2	16	14.8
1452929_at	Clip1	AK003546	0.288587	0.000667853	1.67624e-06	0.898448	0.448459	0.499149	1873.4	1778.7	1351.9	2058.4	1676.4	1614.1	1537	1517.7	803.9	745.6	851	766.7
1435520_at	Msi2	BQ174527	0.927861	0.000778027	4.24313e-07	1.00756	0.502834	0.499063	453.3	396.5	310.5	427.7	403.6	381.1	411.9	403.4	193.7	188.9	214.5	201.4
1434486_x_at	Ugp2	AW146314	0.060455	2.88002e-05	1.23153e-05	0.868443	0.433387	0.499039	3433.9	2893.5	2756.3	3074.5	2586.9	2786.6	2783.9	2401.3	1345.4	1399.9	1203.1	1320.8
1455700_at	Mterfd3	BB359043	0.957957	0.00383815	0.00135854	0.992523	0.495282	0.499013	154.3	142.8	97.8	166.8	174.3	131.4	122.5	129.3	74.3	76.3	68.8	58.8
1447207_at	Zyg11b	BE946949	0.937016	0.00578199	0.00735987	1.01111	0.504545	0.499001	59.6	48.3	38.3	51.8	47.9	55.4	59.9	37	22.1	32.5	29.8	15.5
1451768_a_at	Slc20a2	AF196476	0.701487	0.000766526	0.000193529	0.969106	0.483248	0.498654	242.9	241.3	197.6	276.3	251.4	208.9	231	237.2	90.5	102.8	131.6	138.1
1418290_a_at	Ezh1	NM_007970	0.184773	0.000636629	0.00293752	0.878369	0.437837	0.498466	161.1	135.9	129.4	130.2	132.3	137.2	99.1	120.3	67.9	76.3	66.2	33.3
1449503_at	Kpna1	U20619	0.346439	0.00440521	5.46672e-05	0.865233	0.431272	0.498446	362	289.4	188.7	313	256.8	269.2	252.9	218.8	139.1	115	113.7	129.5
1428075_at	Gm3244 /// Ndufb4	BG968046	0.377904	0.00111736	3.43193e-07	1.07625	0.53616	0.498174	2859.7	2555.4	2098.6	3043.4	2913.1	2791.8	2921.3	2735.9	1519.3	1421.7	1368.2	1351.1
1422017_s_at	4833439L19Rik	NM_029241	0.455423	0.000277157	9.58269e-06	0.938727	0.467647	0.498171	389.2	331.8	275.9	343	334.3	332.3	298.4	292.8	163.2	146.1	159.5	157.8
1456487_at	Adcy1	AI848263	0.296479	2.76204e-05	0.000146845	1.08134	0.538676	0.498156	137.6	126.3	116.5	121.2	155.5	118	134.8	134.1	67.7	62.3	73.5	66.7
1451871_a_at	Ghr	M33324	0.859851	0.00238391	0.000299511	1.01988	0.508052	0.498148	387.2	450.6	284.9	386.2	410.4	433.1	343	352.4	190.7	199.7	155.2	221
1452722_a_at	Cul5	BB702110	0.711854	0.000521054	5.19412e-05	0.96879	0.482159	0.497693	334.3	316.5	237.3	297.4	319.6	269.2	276.2	283.5	133.6	166.7	127.4	143.9
1440648_at	Coq10a	BB321956	0.785322	0.00800243	0.00133732	0.958442	0.476883	0.497561	65.2	47.1	36.7	43.5	43.8	53.5	49.7	37.5	24.6	16.7	26.6	23.9
1419069_at	Rabgef1	BB280137	0.407332	0.000741219	0.000588594	0.910315	0.452744	0.497349	232.6	213	164.2	177.4	184.6	145.1	185.4	201.5	88.5	73	89.8	105.1
1425965_at	Ubc	D50527	0.0038019	0.000271667	0.00390864	0.756267	0.375696	0.496777	77.9	72.6	65.3	71.4	54.9	58.9	57.2	46.2	11.7	36.3	29.8	30.1
1449505_at	Kpna1	U20619	0.655628	0.00371594	4.50503e-05	0.944124	0.468945	0.496698	788.3	630.4	447.1	700.6	672.8	556.9	589.2	604.1	325.5	322.7	298.8	256.5
1437192_x_at	Vdac1	AV020390	0.702639	0.000230381	1.07507e-06	1.02668	0.509874	0.496626	7908.1	7270.5	6098.1	8128	7911.3	7288.1	7795.7	7194	3634.7	3804.6	3914	3639.4
1435635_at	Pcmtd1	BB549335	0.253294	0.000383866	3.26671e-05	0.891356	0.442553	0.496494	206.2	215.5	151.3	179	166.1	171.3	183.8	149.1	87	87.2	76.3	82.3
1460694_s_at	Svil	BM203457	0.613646	0.00167957	2.89029e-05	0.945794	0.46958	0.496493	2918.3	2491.5	1838.6	2776.3	2544.3	2281.4	2487.7	2167.9	1139.3	1349.3	1087.6	1131.2
1443240_at	---	AV319208	0.358423	0.0175387	0.000139309	0.825677	0.409894	0.496434	26.3	21.9	26.2	10.5	17.6	17.7	17.2	17.6	8.4	8	6.8	11.6
1434485_a_at	Ugp2	AW146314	0.00820698	8.65095e-06	2.52409e-06	0.824746	0.409427	0.496428	3060.2	2800.5	2508.1	2814.4	2260.5	2379	2416.2	2167.6	1194.6	1193.3	1037.7	1153.1
1459883_at	---	BB048311	0.586868	0.00286523	0.00207797	1.04606	0.518977	0.496127	62.7	57.3	50.2	64.3	68.6	52.2	64	60.5	29.2	37.6	17.1	37.8
1418715_at	Pank1	BC023496	0.347254	0.000319776	0.000379525	0.920869	0.45679	0.496043	172.2	185.3	138.9	175.9	158.8	146.5	137.9	175.9	69.8	63.6	96.6	77.1
1422484_at	Cycs	NM_007808	0.891624	0.00254351	1.33813e-06	0.98501	0.488324	0.495755	1943.3	1819.3	1203.2	1945.6	1731.7	1719.4	1775	1581.7	837.4	863.6	799.9	874.1
1451118_a_at	Fam53a	BC016596	0.655919	0.00102894	7.23894e-07	1.0396	0.515138	0.495514	409.6	335	275.9	330.4	328.6	362.2	360.9	352.7	179.2	174.4	177	165.3
1424225_at	Asb8	AF398969	0.512413	0.000479722	2.35043e-08	0.945399	0.468211	0.495252	644.9	566.9	453.5	640.5	549.7	525.2	550.1	554.9	274.5	273.5	261.6	270
1458528_at	---	AW491643	0.17206	0.00098363	0.000382357	0.834233	0.413123	0.495213	123.2	126.7	83.5	129.9	113.9	94.8	87.5	90.3	54.4	42.5	41.6	52.9
1426395_s_at	Eif3j	BB379268	0.20142	0.000224176	5.45684e-07	0.896672	0.443786	0.494925	612.8	572.3	435.8	554.7	466	478.6	499	507.2	252.1	243.9	224.6	244.9
1453573_at	Hist1h3d	BB088582	0.546812	0.0196915	0.000332931	1.10072	0.54463	0.494796	48.2	56.9	34.6	69.8	63.3	57.9	47.2	62.2	24	30.1	29.3	30.7
1417325_at	Btrc	NM_009771	0.859048	0.00934863	0.000925971	0.97619	0.482929	0.494708	56.5	54.5	39.5	72.1	56.9	55	58.5	46.9	23.4	36.9	27.7	19.5
1434454_at	Adcy9	BB795229	0.293095	1.53585e-05	0.000106287	0.925369	0.457538	0.494438	165.9	180.9	201.7	189.8	177	192.4	165.3	148.5	87.8	81.2	79.2	89.6
1455204_at	Pitpnc1	BB305507	0.488326	0.0018906	4.90693e-06	0.921586	0.4554	0.494148	798.8	813	500.5	771.1	690.9	622.3	704.8	639.3	335.3	351.1	309.5	317.2
1422479_at	Acss2	NM_019811	0.0789861	0.00027157	5.598e-05	0.81971	0.405044	0.494131	259.1	315.9	217.4	278.1	220.8	241.8	192.8	222.1	103.2	119.4	111.7	99.3
1425927_a_at	Atf5	AF375476	0.548643	0.000262087	1.3331e-05	0.962418	0.475516	0.494085	1241.5	956.9	1173.9	1238.9	1078.1	1112.2	1135.9	1111.7	632.4	590.5	530.3	439.5
1416604_at	Cyc1	NM_025567	0.108177	0.00175377	1.94331e-07	1.15035	0.568135	0.493881	4162.8	3677.6	2905.5	4128.9	4295.3	4341.2	4332.1	4142.6	1940.6	2241.3	2197.6	2071.4
1439633_at	Syt7	BQ175636	0.0806377	0.000592036	0.00029772	0.804002	0.39687	0.493618	107.9	90.3	113.7	77.9	79.8	77.4	87.7	68.5	44.2	43.8	29	37.7
1440452_at	Drp2	AW495265	0.403146	0.000113786	0.000191853	0.934702	0.461294	0.493519	268.1	241.6	255.6	208.7	259.9	232.6	205.7	212.2	132.1	114	105.5	97.7
1432011_at	2900052L18Rik	AK013668	0.261066	0.000123039	8.51964e-05	0.924358	0.456115	0.49344	137.9	119.7	120.7	108.2	110.8	124.5	105.3	109.1	46.6	61.9	49.2	64.2
1453208_at	2700089E24Rik	AV030118	0.379038	2.93298e-05	2.04192e-06	1.04259	0.514419	0.493406	1492.5	1347.1	1273	1487.5	1471.9	1473.1	1522.7	1370.9	754.4	763	645.4	718
1423597_at	Atp8a1	BB303874	0.951609	0.0089599	9.93142e-06	1.00858	0.497466	0.493234	778.5	748.5	410.4	766.3	740.3	641	696.7	648.9	364.5	322.9	341	316.6
1451707_s_at	Slc41a3	BC011108	0.517263	0.00310166	6.11055e-05	0.920432	0.453881	0.493118	360.8	419.5	246.8	409.4	354.4	325	345.4	297.4	143.2	195.3	157	156.5
1423023_at	Sfrp5	NM_018780	0.0606585	0.000902068	0.000462516	1.12911	0.556734	0.493073	100.1	95.5	87.4	94.2	116.7	110.7	95.7	102.8	62.1	63	36.1	48.8
1441193_at	Ctnna3	BB473724	0.175607	0.0114766	0.00253563	0.758377	0.373898	0.493023	35.7	17.3	25	35.4	20.9	22.6	21.5	21	13.7	13.4	4.4	10.9
1460388_at	Acot6	BC002159	0.625292	0.0180912	0.00244633	0.905325	0.446323	0.492997	19.5	40.6	34.8	23.4	22	30.1	23.5	31.5	9.8	13.7	16.3	13
1454849_x_at	Clu /// LOC100046120	BB433678	0.0305941	0.000213108	1.84112e-05	0.788629	0.388664	0.492835	5637.7	4324.1	6183.9	5392.7	4343.9	4335.3	4377.6	3929	2425.8	1819.8	2222.6	1903
1426483_at	Prkrir	BF457576	0.725707	0.00310671	2.07542e-06	1.03852	0.511798	0.492814	1645.1	1368.6	1007.7	1559.9	1540.6	1473.8	1401.2	1380.7	714.6	769.4	679.9	692.6
1416377_at	Pdcd7	NM_016688	0.375369	0.00242495	1.66968e-05	0.889897	0.43829	0.492518	307.6	269.8	176.4	282.5	254.7	221.7	219.6	226.2	124.9	101.9	114.5	112.9
1430055_at	1700080G18Rik	AK006956	0.0127291	8.44783e-05	0.000115792	0.752411	0.370469	0.492376	126.7	167.2	144.5	163	109.9	123.1	119.3	100.2	50.7	66	57.8	48.3
1459869_x_at	4930402E16Rik	BB079116	0.852602	0.00439846	0.00023137	1.02502	0.50459	0.492272	908.3	597.7	567.2	748.1	835.7	624.3	755.5	676.4	374.5	358.5	355.7	334.9
1446357_at	BC020402	BB029175	0.548745	0.0112795	0.000163058	1.08689	0.534884	0.492123	134.1	84	89.6	83.6	90.9	117.5	108.5	108.4	47.1	47	60.9	54.3
1442943_at	Usp20	AV326130	0.5728	0.185309	0.00613871	1.17214	0.576752	0.492051	35.9	10.3	22.1	44.4	31.1	26.1	40.9	34	17.8	22.8	13.8	10.6
1425057_at	Pbld	BC019997	0.424906	0.00439514	0.000507535	0.902017	0.443804	0.492013	20.2	17.2	20	12	16.5	16.3	15.7	14.1	9	4.6	8.8	8.4
1455689_at	Fzd10	BB536115	0.913372	0.00238628	0.00360969	0.990709	0.487331	0.491901	86	98.4	77.5	93.3	95.5	71.2	94.3	90.9	64.6	39.4	27	42.1
1417969_at	Fbxo31	NM_133765	0.240407	0.000707763	0.000142242	0.907445	0.446318	0.49184	364.4	273.4	276	301.7	287.1	276.8	267.1	272	154.1	128.8	165.6	94
1457123_at	Nrg4	BB219343	0.596166	0.223309	0.00533271	1.16667	0.573755	0.49179	24.9	46.2	23.8	9.5	35.6	30.3	27.5	28.4	10.1	9.8	23	17
1449257_at	D11Wsu99e	AV225714	0.991998	0.00284869	7.93649e-07	1.00111	0.492263	0.491716	241.1	253	154.8	249.4	239.7	219.1	219.7	220.8	111.6	105.8	108.3	116.5
1440396_at	---	BG075893	0.0104313	9.43097e-05	0.00015422	0.746207	0.366897	0.491682	126.2	148.5	120.7	112.1	104.8	94.2	94.8	84.9	45.5	40.3	42.2	58.2
1453605_s_at	Ccdc91	AK007017	0.478872	0.00705409	0.000369871	0.899437	0.441864	0.491268	152.8	185.6	95	152.3	127.9	125.4	146.9	126.6	80	64.7	43.2	70.9
1456676_a_at	Pfkfb3	AV282911	0.572748	0.0132614	9.88837e-07	0.904786	0.444332	0.491091	57.8	66.2	30.2	44.3	44	46.4	43.4	45.8	21.2	22.5	20.2	24.3
1460028_at	Grip2	AI426339	0.00429018	8.84278e-06	0.00137607	0.754292	0.370351	0.490991	143.9	141.3	134.4	139.6	119.5	87.4	99.3	115.6	65.8	57.6	44	39.7
1439821_at	Lrp2bp	BB075157	0.886967	0.0114546	0.0015564	0.97979	0.481002	0.490924	37.3	32.1	19.8	34.5	29.6	33.3	32.5	25.8	8.5	14.9	18	18.1
1423737_at	Ndufs3	BC027270	0.251851	0.00123924	3.09014e-07	1.10487	0.542207	0.490744	3318.7	3088.4	2340.1	3407.2	3480	3349.7	3425.4	3173.9	1615.6	1704.3	1655.4	1614.9
1448427_at	Ndufa6	NM_025987	0.41071	0.00162609	4.91304e-07	1.07897	0.529469	0.490719	3441.4	3140.3	2437	3713.5	3515.2	3417.6	3567.8	3237	1660.7	1764.2	1656.8	1659.6
1451558_at	Fbxw7	AV338062	0.765525	0.000232586	1.10088e-05	1.02293	0.501527	0.490284	470.6	410.3	368.3	486.5	490.8	415.4	430.2	439.1	222.2	206.3	226.5	215.5
1446069_at	---	BB667786	0.206883	0.00108514	0.00177144	0.858238	0.42069	0.490179	38.3	25.9	31.5	34.8	31.9	26	23.6	30.5	12.5	15.9	17.4	9.1
1417265_s_at	Coq5	AK014348	0.631402	0.00341185	0.0001105	1.05271	0.51593	0.4901	271.3	227.8	171.4	255.4	248.9	246.2	263.8	215.8	119.2	124.3	93.9	140.3
1435774_at	LOC106740	AV024517	0.721432	0.00265301	0.00100997	1.04539	0.512335	0.490091	200.9	168.2	144.9	219.7	206.1	156	223.7	181.2	75.8	111.1	95.7	93.3
1447811_s_at	Amigo1	BB387182	0.806065	0.00183436	7.12712e-05	0.97381	0.477143	0.489976	52.9	42.9	48.3	65.9	46	49.2	54.3	55	26	28.9	21	24.3
1418563_at	Serbp1	BC006030	0.415889	0.00127591	5.71995e-05	1.08048	0.52932	0.489892	737.4	698	507.4	698.7	781.2	749.6	640.1	683.2	400.2	324.4	344.3	329.3
1434151_at	Mettl7a1	AV171622	0.651454	0.000304406	0.000407803	0.957073	0.468674	0.489695	1111	970.2	1127.7	846.8	1017.8	1128.7	866.7	868.4	534.7	446.3	514.3	405.5
1423536_at	Strn3	BF148627	0.711379	0.00182803	5.21306e-07	0.96044	0.470316	0.489688	1570.1	1474.5	962.4	1435.3	1367.3	1310.2	1320.3	1229.2	645.5	617.4	655.5	641.2
1449341_a_at	Stom	AF093620	0.33941	0.000275397	0.000171449	0.906583	0.443427	0.489118	244.2	284.3	200.7	264.2	232.8	254.3	223.8	189.7	101.8	119.6	107.8	111.3
1420655_at	Pnpla3	NM_054088	0.460248	0.0161166	0.00230632	1.12343	0.549398	0.489038	78	109.7	105.5	64.1	124.4	101.6	86.5	88.9	61.7	49.8	36.1	48.7
1429183_at	Pkp2	AK005020	0.78273	0.00385167	0.000426981	1.03647	0.506718	0.488889	63.1	54.2	37	54.1	58.2	60.7	44	53.1	27.8	26.1	29.1	22.6
1434032_at	Agap3	BQ175381	0.805934	0.000128296	0.00691043	1.03454	0.505756	0.488872	59.8	61.4	59.3	71.4	59.1	47	70	84.5	30.9	32.8	26.6	37.1
1416824_at	B230118H07Rik	NM_026592	0.458896	0.00409281	3.53068e-05	1.09079	0.533027	0.488661	775.6	812.2	521.7	869.9	824.5	806.2	900.5	718.7	382.8	409.7	384.9	410.7
1428516_a_at	Alkbh7	BI903628	0.678724	0.00852875	1.99415e-06	1.05633	0.516067	0.488549	256.2	301.5	187.8	349.9	300	265.5	301	290.6	140.9	141.1	140	143.3
1421836_at	Mtap7	NM_008635	0.461644	0.00105277	0.00101669	1.09269	0.533768	0.488491	128.4	111.3	92.7	97	112.4	108.5	102.4	145.9	59.9	51	63	55.3
1428076_s_at	Gm3244 /// Ndufb4	BG968046	0.489244	0.000584284	2.10429e-06	1.05807	0.51679	0.488429	2599.5	2305.8	1955	2749.4	2545.6	2727.3	2516.6	2378.2	1226.3	1277.2	1257.8	1204.9
1417494_a_at	Cp	BB332449	0.224742	0.00199587	6.0063e-06	0.850265	0.415269	0.488399	2142.4	1612.5	2753.6	2063.3	1897.6	1861.3	1776.1	1753.3	980.8	743.5	951.9	883.4
1423114_at	Ube2d3	AK009276	0.939998	0.00571517	1.07739e-06	0.990185	0.483462	0.488254	904	836.3	499.3	898.6	789.7	798	798.6	721.1	393.1	386.4	378.5	359.2
1428159_s_at	Ndufab1	AK010307	0.285495	0.00346566	5.80284e-07	1.11807	0.545902	0.488252	2300.3	2053.3	1516.9	2431.9	2451.5	2326.1	2315.4	2189.7	1152.6	1128.3	1135.9	1115.5
1416936_at	Aatk	NM_007377	0.38934	0.00357315	0.00209009	1.11225	0.54295	0.488156	222.9	190.5	245.2	172.6	281.6	240.4	200.4	202.1	148.5	112	94.7	96.1
1419054_a_at	Ptpn21	AW987375	0.724493	0.000237865	0.000114219	1.02982	0.50261	0.488054	464.1	411.7	351.9	381.7	477.6	396.9	406.2	376.7	186.3	185.4	218.3	218.9
1428473_at	Ppp3cb	AK004360	0.786274	0.000557797	1.22619e-06	0.976868	0.476742	0.488031	3067.5	2874	2135.8	3015.7	2834.7	2666.7	2792.5	2542.5	1353.7	1382.5	1262.4	1289.9
1441375_at	---	AU043080	0.879993	0.000721743	0.00610359	1.02155	0.49829	0.48778	84	60.2	74.5	73.7	76.7	84.5	88	49.5	44.9	32	37.1	31.7
1423535_at	Strn3	BF148627	0.642804	0.000334609	5.07034e-07	0.963326	0.469703	0.487585	2682.9	2696.9	2023.3	2860.2	2555.6	2495.2	2520	2316.1	1194.1	1258.2	1175.8	1192.6
1455172_at	AU020094	BG069639	0.646725	0.00326188	0.00174266	1.0587	0.51608	0.487464	41.7	45.5	61.2	47.5	59.9	53.4	54	40.1	32.7	20.2	25.2	23
1455436_at	Diras2	BM114282	0.234433	0.000704075	0.00102694	0.874026	0.425974	0.48737	34.9	44	42.9	32.2	38.2	31.2	36.5	28.7	12.7	14	18	20.9
1426285_at	Lama2	U12147	0.243537	0.000315802	7.2409e-05	0.905476	0.441035	0.487075	862.1	767.4	621.6	743.9	707.4	722.3	663.6	618.6	344.8	393.6	321.8	260.7
1431056_a_at	Lpl	AK017272	0.00575813	0.00112321	0.000168094	1.33865	0.651972	0.487036	693.1	749.9	693.1	615.4	934.3	1051.5	836.2	861.3	515	424.8	376.1	478
1417885_at	Mapt	BC014748	0.106868	0.00264312	0.0043235	0.768777	0.374361	0.486957	73.7	55.7	48.4	76.5	48.1	46	59.2	42.2	36.3	16.8	21.5	20.6
1437937_at	Ccbp2	AV220666	0.0666201	0.003502	0.000274631	0.681051	0.33138	0.486571	738.4	459.3	891.5	589.6	474.5	469.5	483.7	396.7	207.8	268.7	248.8	162.4
1438399_at	Pex5l	BB428358	0.758549	0.0003191	0.00293222	0.962296	0.468205	0.48655	51.7	45.3	42.9	37.8	42.2	49.5	48.6	30.7	20.1	23.5	22.4	17.2
1439662_at	Homer1	BM124609	0.535861	0.00234547	0.000370782	0.916244	0.445779	0.486529	262.8	248.4	153.3	242.9	248	183.8	212.2	187.4	105.1	100.4	97.6	101.4
1450296_at	Klrb1a	NM_010737	0.105171	0.168291	3.80627e-05	1.39024	0.676275	0.486443	9.1	16.1	6.1	13.8	16.7	15.9	15.7	14.4	7.8	6.1	8.9	7.7
1424747_at	Kif1c	BC016221	0.136374	0.000764368	4.07157e-05	0.825683	0.401555	0.486331	161.9	131.8	101	132.5	120.1	110	109	96.2	57.6	48.3	53.3	52.5
1453424_at	Fyco1	BM123442	0.0302642	0.00811806	1.38629e-05	1.28258	0.623703	0.486288	241	196.9	161	239.8	269.8	281	280.3	244.6	130.2	136.1	112.8	144
1457553_at	---	BB231894	0.598152	3.96407e-05	1.06247e-05	0.9754	0.4742	0.48616	136.8	121.1	127.9	114.2	120.5	114.9	125.9	126.4	66.4	65	50.8	54.9
1437554_at	Plec	BM232239	0.221398	0.00192294	0.000105797	0.849475	0.412899	0.486064	296	206.6	183.7	247.1	216.9	199.6	180.9	195.5	120.8	95.4	86.5	82.7
1435657_at	Ston2	BQ174439	0.908148	0.00558043	9.64834e-05	0.984294	0.478286	0.485918	309.1	234.1	188.9	324.8	274.7	274.3	269.9	221.4	129.2	111.9	143.9	120.5
1449180_at	Kcmf1	BG071725	0.0483992	0.000157938	0.000298457	0.779146	0.378446	0.485719	474	386.4	333	406.3	275.9	323.3	365.1	282.1	139.3	148.7	166.7	150.7
1454551_at	9530034D02Rik	AK020585	0.257613	5.61678e-05	0.000406185	1.10472	0.535701	0.484919	74.9	65	69.2	64	89.6	70.1	76	66	36.6	39.9	38.7	31.1
1416578_at	Rbx1	NM_019712	0.537235	0.000704943	8.34372e-05	0.93573	0.453707	0.48487	1071.4	814	722.9	873.9	849.2	785.1	912.9	711.2	425	375.7	401.3	377.9
1446900_at	D1Ertd218e	C78942	0.349762	0.22496	0.00129904	1.26923	0.615385	0.484848	0.3	1.1	0.5	0.7	0.8	0.8	0.9	0.8	0.5	0.5	0.4	0.2
1454272_at	9630015K15Rik	AK020680	0.581479	0.0267297	0.000106928	1.09316	0.529887	0.484729	52.9	57.3	25.4	50.1	47.1	56.3	49.8	49.8	19.8	30.3	24.1	24.2
1423942_a_at	Camk2g /// LOC100045547	BM227770	0.528983	0.001007	1.15232e-05	0.934287	0.452871	0.484723	1114.2	1079.6	724.6	1071.7	1007.4	967.8	908.4	844.3	470.2	453.5	446.6	436.7
1438772_at	Zfp367	BB227141	0.727682	0.000605747	0.00276334	0.956812	0.463753	0.484686	40.9	57.6	46	50	39.2	58.5	48.7	39.7	18.1	25.5	25.7	20.9
1436697_at	---	AV303202	0.705252	0.0015703	0.00170734	0.948769	0.459789	0.484616	246.1	175	181.3	250.6	213.5	168.5	249.8	177.5	89.2	101.5	89	112.5
1427373_at	Amigo1	BC010598	0.308899	0.00025873	0.00179058	0.907313	0.439626	0.484536	61.6	51.2	58.2	64.2	55.1	62.9	43.5	51.9	33.4	27.1	25.3	17.6
1427019_at	Ptprz1	BC002298	0.356627	0.0340836	0.000743646	1.1566	0.560243	0.484389	169.7	109.5	188.9	107.9	181.3	177.1	141.6	166.2	52.1	79.2	94	97.4
1415997_at	Txnip	AF173681	0.631455	2.23066e-05	0.00026984	0.966929	0.468281	0.484297	1645.1	1800.7	1547	1701.9	1767.9	1509.8	1791.8	1403.8	694.8	914.4	697.6	828.2
1418959_at	Tmprss5	NM_030709	0.0728401	7.24774e-05	0.000319499	0.829876	0.401798	0.484167	34	38.4	31.5	40.7	29	33.3	25	32.7	12.4	14	15.4	16.3
1430522_a_at	Vamp5	AK009266	0.199549	0.0050842	0.000120008	1.16653	0.564619	0.484016	596.2	581.4	389.4	621.2	724.4	607.1	655.6	565.5	265.8	338.6	312.9	318.2
1451508_at	Larp1b	BC025528	0.382948	0.000815488	0.000359349	1.08893	0.52704	0.483996	359.4	324.8	260.5	334.9	406.7	353.2	326.8	306.7	140.4	160.1	198.8	175.1
1437985_a_at	2310061I04Rik	BB379386	0.787819	0.000636748	1.38764e-07	1.02225	0.494742	0.483975	693.3	655.9	477.4	636.5	653.7	635.1	623.8	605.3	297.6	296.7	303.2	321.1
1452213_at	Tex2	BM239615	0.213018	9.93857e-05	3.42906e-07	0.917859	0.444152	0.4839	770.1	683.1	584.6	736.7	640.7	630.7	625	650.2	336.9	278.1	317.2	300.1
1432268_at	2310068J16Rik	AK010113	0.557627	0.0136256	0.00184447	1.09115	0.527924	0.483824	44.8	50.4	33.6	61	48.3	61.6	43	54.2	21.1	32.7	27.3	19.1
1417441_at	Dnajc12	NM_013888	0.472955	0.00181034	0.00294498	0.901467	0.43562	0.483235	371.3	334	248	396.5	278.7	237.7	331.7	368.7	104.9	171.6	167	144.5
1455056_at	Lmo7	BM231903	0.323055	0.00251468	3.88956e-06	0.879301	0.424862	0.483182	694.4	646.1	401.3	557.3	507.1	508.5	500.4	505.6	212.8	233	241.3	289.7
1455342_at	Prune2	BM232966	0.849289	0.00316387	0.000314169	1.02444	0.494938	0.483129	616.8	552.1	387.1	636.8	599.6	473.3	640.2	533.3	271.6	232.3	290	291.4
1434958_at	Sacs	BG075163	0.737384	0.00098932	7.09423e-06	0.96894	0.468051	0.483055	270.1	273.6	207.2	318	275.5	261.1	252.2	246.9	139.2	112.5	114	134.6
1418782_at	Rxrg	NM_009107	0.649142	0.00356865	0.000335703	0.936799	0.452068	0.482567	131.3	142.5	87	156.6	125.3	112.3	142	105.1	50.8	57.7	62	63.4
1426916_at	Scrn3	BM211317	0.780366	0.00111027	1.37339e-05	1.02529	0.494507	0.482309	598.8	549.7	407.6	583	585.1	562.1	531.9	514.1	274.7	299.8	257.3	226
1423995_at	Kif1b	BQ175246	0.207317	0.000182806	0.000240814	0.87711	0.422909	0.482162	311.2	257.7	224.8	260.9	199.5	269	232.9	223.6	106.4	126.7	101.2	111.7
1423107_at	Ube2b	AK010432	0.785712	0.000455993	1.90341e-06	1.02198	0.492469	0.481879	3280.5	2887.1	2356.9	3233.4	3223	2897.3	3015	2881	1443.5	1544.6	1373	1429.3
1452286_at	Slain2	BG081701	0.0897194	0.000441841	3.81824e-07	0.823061	0.396569	0.481822	2576.6	2134.7	1687.4	2333.7	1790.7	1865.9	1711.5	1819.2	915.9	873.2	806.2	867.7
1448563_at	Phb	AK010619	0.519302	0.000981254	1.25306e-06	1.05835	0.509906	0.481792	501.6	492.7	349.6	503.5	522.2	484.1	484.3	464.6	224.5	240.4	247.5	229.6
1435464_at	1110003E01Rik	BB701294	0.219384	0.000309342	4.596e-05	0.880084	0.423817	0.481564	1434.4	1162.2	1686.4	1362.6	1279.8	1223.5	1374.5	1090.8	556.8	626.1	628.6	581.2
1452184_at	Ndufb9	W29413	0.357411	0.000647566	3.89925e-07	1.0755	0.517789	0.481439	7156.6	6207.3	5283.2	7350	6974.4	7195.5	7148.4	6641.6	3181.5	3595.6	3408	3275.9
1456925_at	P2rx6	AW490413	0.359733	0.00253097	0.000285864	1.09717	0.528156	0.481382	63.6	71.9	55.4	80.8	82.5	71.8	78.6	65.2	27.9	33.9	37.3	44.4
1444048_at	---	AI666576	0.0559613	0.000211543	2.28549e-05	0.81504	0.39232	0.481351	70.3	71.6	94.9	75.7	66.6	65	57.2	65.9	32.8	27.5	34.5	27.8
1451190_a_at	Sbk1	BC025837	0.419735	0.000427267	1.58916e-06	0.930429	0.447857	0.481345	500.1	562.2	415.3	599.4	487.3	487.9	504.7	452.6	224.1	237.1	216.4	252.6
1417373_a_at	Tuba4a	AW491660	0.738521	0.00329144	6.08731e-05	1.03329	0.49728	0.481259	9117.1	8172.4	5953.8	9236	8393.6	8021.7	8444.6	8700.6	4800.5	3394.6	4711.4	3244.8
1446302_at	Ccbl1	BB519015	0.301459	0.052115	0.0023292	1.23375	0.59375	0.481256	26.9	11.9	17.6	23.6	31.4	19.9	25	22.4	11.2	10.7	13.1	12.5
1435261_at	Tmtc1	BQ174442	0.769992	0.00160779	1.2327e-05	0.969456	0.466488	0.481185	630.4	534.1	389.4	534.9	523	524.4	518.4	459.2	268	239.3	256.5	210.6
1428299_at	Dyrk1a	AW553942	0.940652	0.00132742	1.19477e-05	0.992955	0.47778	0.48117	546	426.2	366.3	506.7	425	472	461.5	473.7	199.6	205.3	215.2	261.5
1455405_at	Pstpip2	AV229693	0.80912	0.00242578	7.11507e-07	0.97313	0.468112	0.481038	490	472.8	310.4	520.6	447	440.6	445.1	412.9	230.4	206.7	197.5	205.1
1416090_at	LOC100044400 /// Pdhb	AK011810	0.716359	0.000974385	1.45117e-07	1.03203	0.496421	0.481015	3157	2824.6	2178.9	3198.2	2971.5	2873.4	3018.8	2858.8	1295.5	1465.2	1452.3	1425.7
1442542_at	Eya4	BB363812	0.764104	0.0013291	9.43212e-06	1.02868	0.494691	0.4809	712.8	750.6	502.2	614.8	712.2	677	640.4	624.8	322.5	279.2	318.2	356.6
1418372_at	Adsl	NM_009634	0.978034	0.000647096	0.00020393	1.00273	0.482111	0.4808	508.3	527.9	370.8	462.9	530.5	489.9	452.8	401.8	260.3	226.1	196.1	219
1443872_at	---	AW493461	0.808235	0.000442137	0.00025882	1.02331	0.49199	0.480781	170.6	177.4	152.3	130.2	178.4	163.5	170.3	133	72.7	74.4	91.3	71.8
1439026_at	Trpm3	BB125842	0.724217	0.00569724	0.00457613	1.02895	0.494432	0.480519	21.4	20	22.7	25.7	20.4	25.9	24.5	21.6	8.3	10.8	18	7.3
1431365_at	Rnf32	BB653155	0.31137	0.000873828	0.000273821	0.901615	0.433186	0.480456	85.5	89.5	98.9	66.6	82.1	79.7	78.3	66.9	37.9	30.9	47.9	30.8
1423061_at	Arvcf	BE947943	0.0425842	3.25432e-06	2.25154e-06	0.903916	0.434204	0.480358	96.2	101.4	87.6	97.8	91.7	83.5	88.1	82.9	37.9	40.4	43.2	44.8
1419283_s_at	Tns1	NM_027884	0.451626	0.000182428	2.0191e-05	0.956396	0.459346	0.480288	2634.8	2050.9	2484.3	2306.3	2285.3	2331.4	2235.7	2210.7	896.1	1329.6	1135.4	991.8
1430965_at	9430064K01Rik	BB098581	0.70628	0.0144389	0.000286802	0.937888	0.450311	0.480132	81.6	52.8	44.6	46.4	46.9	55.8	55.9	52.8	17.3	24.5	30.5	29.2
1458812_at	---	AV251163	0.0462237	0.000396173	0.00257217	0.846242	0.406196	0.48	44.2	47.9	40.2	42	35.7	43.1	34.3	34.4	9.2	17.1	19.7	24.8
1447724_x_at	Opa3	BB324282	0.570086	0.00715008	9.93702e-05	1.07793	0.516909	0.479538	548.4	407.1	322.8	528.4	526.3	414.9	495.5	510.8	224.7	240.4	264.5	204.3
1440016_at	---	AW553188	0.449464	3.39786e-05	0.00476001	0.913702	0.438076	0.479452	37.6	34.6	39.6	40	41.2	24.7	32.5	40.3	20.9	14	15.3	16.3
1435870_at	Chpt1	BM899344	0.958024	0.00354249	5.07688e-05	0.993608	0.476334	0.479398	562	511	324.5	495.5	497.7	453.3	506.5	423.4	233.4	258.9	216.4	193
1419365_at	Pex11a	NM_011068	0.0363764	0.00661835	6.10511e-05	1.28699	0.616898	0.479333	67.5	58.2	54.5	43.5	69.9	64.6	80.6	72.8	37.4	29.8	33.7	37.1
1455746_at	Kif13a	BF166390	0.601244	0.00016315	3.21821e-06	1.0312	0.494245	0.479291	1062.7	916.1	882.9	1099.9	1053.4	1047.2	991.7	992.9	467.7	564	492.7	433.6
1436117_at	A830010M20Rik	AV327791	0.497712	0.00271191	8.83925e-06	0.921148	0.441445	0.479234	108.8	129.3	86.6	145.8	109.6	105.7	110.2	107.9	57.2	60.1	46.2	44.2
1418626_a_at	Clu /// LOC100046120	NM_013492	0.00284187	6.88538e-06	4.36325e-05	0.755457	0.362028	0.479217	2698.3	2375.3	2869.1	2588.8	1927.7	2058	2177.9	1792.5	1067.8	810.8	967.3	966.8
1432646_a_at	2900097C17Rik	BE859789	0.785358	0.00208062	0.000423688	0.969231	0.464358	0.479099	316.7	357.5	227.7	339.6	278.3	338.6	320.5	265.9	116.4	133.1	143.1	183.9
1431190_x_at	Fahd2a	BI872590	0.4839	0.00756428	6.91762e-05	1.09576	0.524792	0.478929	121.3	142.4	95.9	168.8	153.2	156.4	143.7	125.7	80.1	65.3	66.4	65.5
1421379_at	Zfp354b	AF184112	0.366795	0.000341065	0.000370602	0.91307	0.437115	0.478731	44.7	37.4	34.3	45.8	41.1	37.7	38.8	30.5	21.1	18.8	16.4	14.6
1434342_at	S100b	BB316114	0.0126765	0.000210943	5.95931e-06	0.700243	0.335101	0.47855	595.7	515.7	759.4	599.2	422.1	465	403.2	439.3	200.7	207.9	191.4	227.7
1422483_a_at	Cycs /// Gm10053	NM_007808	0.231683	0.00274128	7.95617e-07	1.12559	0.538555	0.478462	3435.3	3111.2	2436.7	3835	3656.6	3629.7	3718.3	3423.5	1641	1695.8	1913.8	1652.7
1425920_at	Cuedc1	BC025434	0.66475	0.00194701	4.72919e-05	1.04354	0.499156	0.478331	183.8	131.1	126.4	151.3	165.7	154.9	158.2	139.6	70.7	76.5	87.5	61.1
1418922_at	Cadm3	AY059393	0.817828	0.00228021	0.000101959	0.97507	0.466366	0.47829	104	111.5	149.3	100.5	126.1	110.1	111.4	106.1	52.7	68.4	48.8	47.1
1434914_at	Rab6b	BB396668	0.377851	9.63699e-05	0.00303002	0.899185	0.429993	0.478203	214.4	189.7	237	193.1	213.8	212.2	131.9	192.2	92.9	69.4	101.7	94.7
1419811_at	Adcy9	AW125421	0.615146	1.08139e-05	9.35321e-06	0.975989	0.466707	0.478189	383.8	379.7	334.6	388.7	382.6	339.4	381.6	347.5	196.2	162.7	172.8	162.2
1423396_at	Agt	AK018763	0.610083	0.00223615	0.00271438	0.944954	0.451473	0.477772	93	126.4	102.8	92	93.8	109.1	108.6	79.9	35.7	64.3	31.8	55.2
1456419_at	5730455P16Rik	BI108098	0.84465	0.0019654	1.17021e-05	1.02131	0.487839	0.47766	427.8	307.7	275.1	350.3	366.1	323.6	373.2	327	164.7	176.9	153.9	168.4
1435268_at	---	BB274357	0.204972	0.00031065	0.00189156	0.846276	0.40412	0.477528	14.7	13	18.1	17.3	15.6	12.8	14.9	10.1	6.6	7.4	5.1	6.4
1452281_at	Sos2	Z11664	0.409531	0.000922828	1.65565e-05	0.911047	0.435043	0.47752	559.6	535.8	480.2	358	474.3	434.3	461	392	205	216	203.1	217.1
1423287_at	Cbln1	AA016422	0.0881692	0.00262593	0.00140721	0.714548	0.341194	0.477497	109.3	71.9	84.9	60.4	47.2	67.6	63.8	54.7	21	31.9	24.9	33.6
1416332_at	Cirbp	NM_007705	0.341043	0.000126391	1.00406e-05	0.932758	0.445255	0.477353	1307.4	1043.8	1010.8	1135.2	1002.3	1017.6	1137.6	1037.3	430.5	544.3	539.5	488.1
1449405_at	Tns1	NM_027884	0.259306	4.21754e-05	5.07948e-06	0.941716	0.44948	0.477299	1036.7	835.8	964.7	949.4	928.5	881.2	900.2	856	423.7	489.7	359.9	428.7
1432439_at	Zfp715	AK011730	0.2479	0.00115393	0.0014532	0.890768	0.424947	0.477057	35.5	31	32.9	42.5	35.1	27	32.2	32.1	20.3	16.5	8.5	15
1426264_at	Dlat	AV336908	0.332401	0.00124199	2.29019e-07	1.09013	0.519968	0.476977	912.5	779.5	612	863.5	860.6	882.2	889.2	821	400.8	422	430.2	394
1441730_at	---	AI893572	0.827072	0.00325917	0.00317525	1.02569	0.489209	0.476954	27.2	19.1	24.3	26.7	28.4	28	19.9	23.5	14.6	15.6	9.2	8.2
1442561_at	---	BG073012	0.074047	0.00232676	0.00509841	0.673791	0.321147	0.476628	48.6	29.6	57.2	42.4	27.3	39.3	29.7	23.5	16.6	10.4	14.1	16
1459289_at	---	BB127991	0.542474	0.0352649	0.000849811	1.12376	0.535561	0.476578	169.8	105.1	85.7	175.1	152	174.5	158.6	116.9	67.8	80.7	62.5	75.9
1458551_at	AY512938	BM239547	0.0163283	0.000387938	2.47078e-05	0.672368	0.320407	0.476535	189.8	155.2	131.4	201.8	123.5	114.1	117.7	100.7	53.4	50.2	55.1	58.6
1428411_at	---	AK004510	0.606012	0.000217108	1.72211e-07	1.03593	0.493403	0.476289	2865	2559.6	2117.5	2735.7	2735.1	2601.9	2747.7	2562.4	1230.8	1328	1238.7	1273.6
1456406_at	Gm14964	BE988787	0.686234	7.03272e-05	2.24882e-05	1.01578	0.483683	0.47617	109.1	109.5	119.4	124.7	122.2	119.2	114.3	114.3	53.6	68.7	45.3	56.2
1435322_at	Ankrd40	BB213578	0.0678482	8.36935e-05	8.10962e-07	1.12487	0.535486	0.476042	754	647.5	617.2	740.1	804.4	776.8	800	722.1	369	357.4	382.2	368.7
1454868_at	Tmem201	BB104462	0.535933	0.00427484	0.000238493	1.0695	0.50911	0.476026	255.8	237.4	185.8	298	241.2	246.6	291.3	265.8	99.9	156	137.4	104.1
1452731_x_at	100041874 /// ENSMUSG00000063277 /// ENSMUSG000000	BM195235	0.143947	0.0530537	6.08055e-05	1.26445	0.60157	0.475756	165.8	195.1	85.7	152	176.2	191.6	196.1	193	72.7	84.5	87.8	115.1
1456665_at	Eya4	BB476944	0.288444	0.000438264	2.36059e-07	1.08431	0.515784	0.47568	303.5	276.3	215.9	262.3	282.5	294.1	297.5	273.1	141.1	133.6	133.3	137.7
1416337_at	Uqcrb	NM_026219	0.712951	0.00202011	1.36078e-05	1.03919	0.494257	0.475618	2642.8	2481.2	1710	2663.7	2552.8	2499.4	2601.6	2216.1	1107	1094.2	1173.5	1319.6
1425454_a_at	Il12a	AF128210	0.0551388	0.00013162	0.000103866	0.906516	0.431	0.475446	62.3	56.1	60.8	67.9	56	56	56	56	19.1	23.4	33.1	30.9
1437662_at	Acsm5	BB667617	0.0145913	0.000753238	0.00553879	0.752809	0.357678	0.475124	14.4	12	12	15	10.9	9.9	10.9	8.5	6.9	6.2	4	2
1434756_at	5430421B17	AV292354	0.461354	0.000975984	1.84779e-05	1.06728	0.507	0.475039	951.6	875.5	656.7	787.6	950.8	878.7	808.8	853.2	436.5	457.6	351.3	413.2
1418602_at	Cdh15	NM_007662	0.732155	0.000114896	2.07908e-06	0.977162	0.464119	0.474967	252.9	246.4	192.5	232.1	213	239.7	229.4	220.7	107.3	98.3	108.2	115
1433691_at	Ppp1r3c	BQ176864	0.297568	0.00521764	3.8521e-05	1.12451	0.534043	0.47491	1600	1129.2	1063.1	1517.2	1626.5	1478.5	1372.5	1493.1	817.6	759.4	675.7	582.8
1420734_at	Ppp1r3f	NM_138605	0.630369	0.071129	0.00101174	1.10069	0.522637	0.474827	73.4	95	30.8	76.9	74.7	75.2	72.8	81.2	21	33	52.2	38.1
1417737_at	Mrps31	NM_020560	0.322506	0.00394047	4.34814e-06	1.11403	0.528946	0.474806	399	338.8	244.6	382.2	397.3	356.7	397.4	368.8	181.6	173.8	165.5	200.9
1437479_x_at	Tbx3	BB728182	0.0323222	0.0151912	0.00018105	1.27006	0.602812	0.474631	144	115.2	101.7	151.2	163	165.1	151	171.3	97.6	68.1	87.8	55.2
1431248_at	5031426D15Rik	BB637274	0.532043	0.0066487	0.00297439	1.08292	0.513886	0.474536	111	120.1	160.5	116.1	163.7	135	141.4	109.7	61.7	94.8	52.1	52.3
1453094_at	Foxn3	AK017346	0.376743	0.000790379	0.000275415	1.09792	0.520926	0.474465	237.2	190.4	191.7	252.8	195.6	261.8	237.3	262.8	100.9	126.3	116.4	110.7
1427097_at	Wwp1	BI102531	0.156909	0.00160681	5.11098e-06	1.14714	0.544017	0.474237	1178.6	1028.6	782.7	1082.4	1131.2	1110.8	1149.5	1280	583.5	563.2	547.3	521.4
1419098_at	Stom	AF093620	0.834974	0.0011375	0.00218831	1.02556	0.486313	0.474194	209.8	238.2	166	211.6	171.2	262.4	199.2	213.9	91.2	127.4	78.5	104.4
1452206_at	Sucla2	AK005273	0.393773	0.00216292	2.20107e-07	1.08773	0.515785	0.474184	3288.8	2922.1	2115.1	3235.4	3158.3	3117.4	3279.9	3020.1	1460.9	1567.5	1524	1410.8
1442752_at	---	BE650754	0.481211	0.00928633	0.00791935	1.14105	0.541053	0.47417	26.5	17.1	29.6	21.8	33.3	18.8	32.6	23.7	10.1	13.8	13.3	14.2
1444786_at	Nol3	BB546891	0.517626	0.00615422	0.000638917	0.901334	0.427371	0.474154	122.3	124.8	110.3	189.9	116.3	143.8	106.7	126.5	76.1	49.5	57	51.3
1444409_at	Rph3al	BQ176035	0.880618	0.00256493	0.000100076	0.981	0.465053	0.47406	134.9	106.5	79.4	121.3	103	93.7	120.8	116.2	48.4	51.5	53.1	52.6
1420715_a_at	Pparg	NM_011146	0.184654	0.0038357	0.0030979	1.23886	0.587121	0.473921	105.4	105.9	140.6	96.9	125.6	183.6	128.7	118.1	69	67.7	69.9	56.9
1430307_a_at	LOC677317 /// Me1	AK006387	0.789655	0.00412933	0.000356274	0.961845	0.455736	0.473815	998.2	971.9	556.8	869.8	976.4	752.1	817	721.6	383.4	381.6	434.2	348.8
1420827_a_at	Ccng1	BG065754	0.0910722	0.00315303	8.54464e-06	1.19086	0.563977	0.473586	1997.1	2045.4	1422.9	2183.5	2327.6	2120.4	2441.4	2219.4	1117.5	1158.3	928.1	1109.9
1455901_at	Chpt1	AI642069	0.659949	0.000260538	0.000494688	0.958398	0.453861	0.473562	265.6	282.6	212	275.8	264.8	240.1	283	205	122.5	129.8	90.4	127.5
1434282_at	Ibtk	BM250711	0.469734	0.00743757	4.03467e-05	0.882963	0.418112	0.473533	311.4	301.4	149.3	299.1	224.9	254.5	249.5	208.1	99	113.1	115.8	115.8
1420513_at	Efcab2	BC025062	0.845408	0.00552675	0.000261305	1.02551	0.485571	0.473491	117.9	113.4	90.9	156	132.1	134.4	116.8	107.1	70.3	63.7	51.3	46.9
1420738_at	Mzf1	NM_016793	0.258912	0.241141	0.000151253	1.35135	0.63964	0.473333	2.3	2.2	5	1.6	3.4	3.6	4.3	3.7	1.5	2	1.6	2
1449625_at	---	AA619999	0.00562315	1.06279e-05	0.000130901	0.858657	0.40636	0.473251	220.4	208.6	211.8	208.2	168.8	191.8	173.4	195	64.1	80.9	105.7	94.3
1433513_x_at	Ndufa12	BF152811	0.252959	0.00123671	3.52234e-07	1.10731	0.523665	0.472915	4139	3750.8	2918.8	4319	4299.7	4090	4342.1	4019.2	1934.1	2022	2092.7	1873
1433404_at	4930423O20Rik	AK015192	0.423964	0.0782161	0.000202199	1.18492	0.560144	0.472727	21.5	15.1	9.5	9.6	14.2	18.9	16.3	16.6	7.3	6.7	8.2	9
1426856_at	Hsdl2	BM200015	0.618678	0.000362982	0.000108684	1.04317	0.493115	0.472708	135.8	150.6	110.7	140.3	151	137.7	121	150.9	75	64	70.4	55.6
1451872_a_at	Neurl1a	AF400063	0.988107	0.00274865	0.00461403	0.997538	0.471333	0.472496	87.8	59	57.7	79.8	72.7	88.4	48.1	74.4	31	30.8	35.1	37.1
1419144_at	Cd163	NM_053094	0.920505	0.000321685	1.14682e-05	1.00665	0.475576	0.472434	577.7	492	643	512.6	561.4	542.3	586.9	549.5	310.6	275.2	258.5	214
1416850_s_at	Cisd1	NM_134007	0.435476	0.0028018	3.89697e-06	1.08716	0.513457	0.472291	3320.2	3079.9	2184.9	3561.5	3570.8	3166.6	3337.3	3130.5	1544	1592.9	1652.1	1447.7
1417846_at	Ulk2	NM_013881	0.991325	0.000524613	1.46485e-06	0.999071	0.471732	0.472171	517.9	536.3	372.7	511.7	509	472.7	500.4	454.7	217.4	235.8	221.9	239.4
1436502_at	Mtus1	BB747681	0.537842	0.00246676	5.61242e-05	0.924412	0.436258	0.47193	309.2	331.7	194.9	316.5	270.5	294.7	258.4	241.6	125	132.1	102.9	142.7
1423490_at	Fbxo3	BG867006	0.828408	0.000742871	5.29738e-05	1.02031	0.48106	0.471483	1325.8	1286.5	931.6	1305.6	1332	1257.8	1278.9	1079.3	528.5	679.4	546.3	578.7
1454940_at	Gm8394 /// Psma5	AA200355	0.96393	0.0129756	0.00141961	0.991704	0.467572	0.471483	44.1	31.3	20.4	36.8	29.7	28.8	31.2	41.8	15.4	16.4	13.3	16.9
1442687_at	1700064N11Rik	AW495408	0.755938	0.0063035	0.00199868	0.947086	0.446465	0.47141	45.4	67.8	49.1	79.6	58.7	53.4	72	45	28.3	29.9	23.9	25.9
1450756_s_at	Cul3	AV273804	0.776299	0.00461836	1.06536e-05	0.963817	0.454106	0.471153	355.9	420.2	235.7	414.3	362.9	333.1	332.6	345.9	178.8	184	136.9	147.9
1428960_at	Enkur	AK017056	0.948622	0.0568951	0.0023959	1.01417	0.47769	0.471014	44.6	32.1	38.2	75.6	54.6	47.5	41.4	49.7	12.2	32.9	21.2	24.7
1431382_a_at	Clip4	AK018895	0.361477	0.00117357	4.4993e-05	0.90236	0.424573	0.470514	157.5	168.5	112	176.5	138.2	141.2	149.1	126	76	60.3	71.2	53.4
1435836_at	Pdk1	BB553369	0.714498	0.00898139	1.03907e-06	0.943714	0.443837	0.470309	591.9	499	303.4	636.4	490.3	471.4	498.9	455.8	203	230.6	225	242.7
1447818_x_at	Rhebl1	AV271831	0.245479	0.00933478	0.000994574	0.773145	0.363371	0.469991	108.7	61.8	148.7	126.9	106.2	81.5	78.7	78.5	31.1	45.5	47.4	38.1
1424312_at	Adipor1	BC014875	0.138428	9.89606e-05	1.12396e-06	0.88678	0.416766	0.469977	475.2	361.6	390.9	453.1	395.1	372	352.7	370.7	161	180.8	175	183.7
1457147_at	Etl4	BB557242	0.687348	0.000158543	4.21647e-06	0.973697	0.457609	0.469971	247.8	206.1	187.8	209.9	196.1	215.5	206.9	210.7	80.8	99.9	104.5	104.5
1459223_at	B930095G15Rik	BB376007	0.294068	0.00162881	0.000304157	0.879527	0.413306	0.469918	118.3	92.2	74	104.8	95.5	86.8	83.3	76.8	42.5	49.4	27.1	41.9
1451742_a_at	Ugp2	AF424698	0.124475	3.73472e-05	6.93786e-06	0.893772	0.419944	0.469856	5725.2	4860.4	4546.7	5412.1	4468.3	4832.5	4841.7	4219.5	2123.6	2376.6	2051.7	2075.6
1453735_at	5730455P16Rik	BF535440	0.263083	0.00462847	0.000642317	0.808207	0.379661	0.469757	132.3	191.2	95.3	141.7	117.2	135	110	90.8	50.8	54.3	50.7	57
1449964_a_at	Mlycd	NM_019966	0.549989	0.00262132	6.31941e-06	0.928278	0.436011	0.469699	459.6	335.3	270	396.3	340.2	359.1	335.2	321.9	184.3	140.8	148.8	163.2
1453004_at	Slc22a23	BM234253	0.235406	0.0524339	0.00714382	1.28501	0.603556	0.46969	181.6	140.4	82.5	141.1	189.5	158.3	126.9	226.4	74.5	62.9	106.8	85.1
1420242_at	---	AV142416	0.390141	0.00904136	2.23262e-05	1.11512	0.523524	0.469479	25.9	26	16.8	31.2	27.9	25.5	29	29	15.4	12.9	13.2	10.8
1415881_at	Ghitm	BC010224	0.740209	0.000980589	2.19817e-07	1.03009	0.483585	0.469458	2634.4	2482.2	1754.7	2513.4	2465.5	2359	2494.4	2348.2	1222.2	1148.3	1087.7	1080.1
1458601_at	8030447M02Rik	AI503942	0.0299667	0.0018437	0.000985442	1.25043	0.586892	0.469353	125.5	117.5	109.4	116	167.2	128	131.4	159.1	65.6	73.6	47.4	88.3
1441165_s_at	Clstn2	AI448973	0.00401252	0.00239363	8.87298e-05	1.3945	0.654513	0.469353	93.6	88.3	79.8	72.9	129	123.3	104.8	109.5	51.8	62.7	46.7	57.8
1438678_at	1500011K16Rik	AV154001	0.539349	0.00491614	1.72124e-05	1.07971	0.506737	0.469326	797.9	685.8	490	854	844.7	705.9	785.7	716.8	371.9	357.8	356.8	346.4
1455806_x_at	Ndufa12	AV124207	0.329351	0.000409741	2.60824e-07	1.07645	0.505085	0.469212	5235.4	5029.3	3942.4	5496.3	5274.2	5399.2	5490.8	5045.6	2552.8	2557	2523.2	2318.9
1429613_at	Dusp28	BE986076	0.733698	0.00107163	1.22999e-05	0.968112	0.453975	0.468928	264.8	222.9	182.8	270.3	221	242	220.1	227.7	104.5	89	106.9	126.7
1435213_at	Nhlrc1	BB309133	0.888409	0.0085375	0.000160605	1.02169	0.478974	0.468807	126.4	77.6	70.9	103.2	101.8	109.5	92.9	82.1	48.8	47.3	41.1	43.9
1422699_at	Alox12	BB554189	0.462633	3.59808e-05	0.00234489	0.9177	0.430095	0.468667	189.2	157	185.6	162	167.7	183.2	174.5	111.3	76.6	83.6	74.1	64.1
1415812_at	Gsn	NM_010354	0.824949	6.86733e-06	1.50581e-06	0.992389	0.465017	0.468584	13994.9	12192.2	13480.3	13110.2	12927.9	13469.2	13403.3	12575.5	6910.7	5878.4	6280.6	5472.8
1436532_at	Dclk3	BB326709	0.579151	9.36204e-05	0.000575058	1.05095	0.492015	0.468162	35	34.6	32.9	29	40	35.8	34.5	27.9	17.3	17.2	17.6	12.6
1417264_at	Coq5	AK014348	0.421278	0.000387577	4.82305e-06	1.06466	0.498283	0.468022	456.2	479.7	375	523.4	525	497.4	469.3	461.2	213.2	235.4	249.9	215.5
1450968_at	Uqcrfs1	AK003966	0.177343	0.0018056	2.34094e-08	1.13567	0.531387	0.467906	3395.9	3129.3	2285.8	3448.8	3544.3	3463.2	3544.6	3371	1611	1692.7	1644.7	1566.3
1436665_a_at	Ltbp4	BB554226	0.265195	5.2251e-05	3.99255e-05	0.911285	0.426302	0.467804	1245.6	1166.8	1436.2	1119	1147.4	1267.3	993.2	1119	541.2	528.5	528.8	519.2
1433825_at	Ntrk3	BM245880	0.277612	0.00338838	0.000367232	0.841794	0.39376	0.467763	113.5	109.7	182.4	136.1	120.3	127.4	97	111.3	68.3	49.3	52.3	43.4
1457250_x_at	Nr1d2	BB147330	0.156039	9.28606e-05	0.0010467	0.844947	0.395016	0.467504	104	123.6	113.6	92.2	77.3	96	111.9	81	46.9	38.4	38.9	47
1453997_a_at	Nes	AK012622	0.216628	0.00277386	0.00144693	0.825782	0.38545	0.46677	43.4	34.4	29.6	49.3	33	37.8	31.5	27.1	12.7	10.2	18	19.5
1426265_x_at	Dlat	AV336908	0.460697	0.000905412	1.77568e-08	1.06584	0.497253	0.466534	964.6	828.4	641.2	878.2	910.7	886.7	872.1	861	397.4	410.7	419.6	419.4
1422577_at	Cs	AB056479	0.820408	0.00104562	5.92065e-07	1.02166	0.476371	0.46627	1654.5	1725.6	1139.6	1665.6	1660	1617	1545.7	1496.6	704.8	750.7	761.6	729.4
1443822_s_at	Cisd1	AV347904	0.776243	0.00263372	0.000382376	0.961593	0.448244	0.466147	173	184.5	108	175	185.1	148.2	148.8	133.8	81.1	72.2	70.3	63.5
1459882_at	Asf1a	AV312905	0.944428	0.0155207	0.00206251	0.988065	0.460358	0.465919	26.7	33.9	18.6	38.1	25.2	28.4	27	35.3	15	9.8	18.5	10.7
1435092_at	Arl4a	AV328143	0.893752	0.000117593	4.00339e-06	1.00867	0.469927	0.465889	261.5	215.4	269.7	222.7	232.9	256.9	233.7	254.2	101.5	125.9	117	111.1
1449913_at	Zfp2	NM_009550	0.0910087	0.0031591	0.00820337	0.70668	0.329138	0.465753	31.1	31.8	20.5	19.9	21.1	21.7	16.4	13.8	10.3	5.2	6.3	12.2
1436182_at	Satb1	BG092481	0.75806	0.00253143	0.000642386	0.958776	0.446377	0.465569	91.3	83.7	53.7	81.8	84.8	59.3	73.6	80	38.9	37.9	27.2	34.6
1424999_at	1700022C21Rik	BC027007	0.980824	0.00187352	0.00211122	0.99648	0.463657	0.465295	145.3	106.8	94.9	135.9	139.1	138.9	115	88.2	55.6	64.4	54.1	49.8
1446603_at	---	AW554842	0.867902	0.0919486	0.00409008	1.04853	0.487867	0.465286	13.5	29.2	26.7	8.9	15.1	18.7	25.9	22.4	9.7	7.5	10.3	10.7
1454708_at	Ablim1	BG065289	0.531769	0.00038887	2.8679e-05	0.952786	0.443229	0.465192	1380	992.9	1175.3	1259.7	1118	1157.6	1091.9	1213.4	460.3	586.3	638.5	445.9
1449083_at	Ccdc91	AA067702	0.85885	0.000328535	2.403e-05	0.983992	0.457539	0.464983	920.7	866.5	662.8	929.6	905.2	801.2	879.7	739.4	381.2	402	382.7	380.4
1440199_at	AU042651	AU042494	0.847394	0.0239859	0.00584302	0.957774	0.445298	0.46493	14.7	12.8	6.8	17.8	9.1	12.6	12	16.2	4.7	4.7	6.5	7.3
1440090_at	Slc25a27	BB475037	0.473369	0.000306979	1.22673e-05	0.938621	0.436034	0.464548	149.2	121.2	171.8	137.8	149.8	135.2	130.1	129.3	54.8	64.4	65.7	68
1435754_at	Zyg11b	BQ180736	0.930072	0.000639915	2.50934e-06	1.00775	0.468109	0.46451	999	828.5	677.2	914.8	870.9	813.7	920.5	840.9	396.3	435.2	366.3	402.9
1427445_a_at	Ttn	BC025840	0.678382	5.25202e-05	6.64391e-06	1.01942	0.473371	0.464353	14414.8	13288.5	11918.9	13915.5	13318.3	14305.1	13771.7	13182.3	7197.9	6784.4	6158.4	5202.5
1433970_at	Bola3	BB610351	0.27583	0.00686192	6.92917e-06	1.14739	0.532533	0.464127	1320.3	1275.7	801.6	1435.9	1490.4	1350.7	1442.4	1262.4	669.3	649.2	627.8	627.7
1441376_at	Gabarapl2	BB426412	0.552874	1.91424e-05	0.000111108	0.958154	0.444657	0.464077	161	138.1	160.7	166.3	149.5	134.2	143.1	173.1	65.2	62.9	72.1	78.2
1442833_at	D15Ertd30e	BG065715	0.179498	0.0237228	0.000122896	1.21199	0.562165	0.463838	78.1	47.5	48.9	49.1	62.2	71	72.6	65.2	32.7	23	30.7	39.3
1452845_at	Hif1an	BB726995	0.786652	0.0158143	0.000817917	0.958287	0.444383	0.463726	61.2	49.4	31.5	37.7	44.3	44.5	42.8	40.7	25.9	22.1	22.5	9.4
1426773_at	Mfn1	AK018181	0.67774	0.0009555	1.91004e-06	0.95802	0.44397	0.463425	612.3	500.6	390.2	557.4	527.5	484.8	501.5	460.2	228.4	217.3	233.4	235.7
1429735_at	Qk	BB659256	0.119481	0.000506813	2.64412e-06	0.837416	0.387404	0.462618	1159.5	835	791.6	965.8	823.6	791.8	777	749.5	404.8	387.3	338.1	323.3
1426431_at	Jag2	AV264681	0.919452	0.0245571	0.000230683	0.979447	0.453053	0.46256	253.9	156.2	105.2	161	149.1	165.5	150.3	197.5	75.9	74	81.2	75.3
1456609_at	Camk2n1	BE994488	0.302865	0.00215916	3.92573e-06	0.870808	0.402442	0.462148	963.2	662.3	1137.8	815.1	796	805.3	767.3	747.5	314.3	395.5	402.7	327.6
1427014_at	Dennd4b	BC026996	0.573031	0.00285664	0.000125186	0.926425	0.428074	0.462071	708.7	694.8	486.4	869.2	653.2	713.5	636.1	553.3	345.7	288.7	242	304.7
1427482_a_at	Car8	X61397	3.58138e-07	2.22662e-08	1.01023e-05	0.611787	0.282616	0.461952	230.7	228.3	227.2	226.7	142.5	141.9	145.1	129	54.6	60.6	69.8	73
1435344_at	Tfdp2	BM246377	0.190234	0.000107893	1.62708e-05	1.08702	0.501958	0.461775	483.3	449.3	384.4	444.7	463.5	464.5	460.8	526.2	194.4	242.7	245.1	202.1
1449159_at	Gnb3	NM_013530	0.706808	0.00888434	0.00212574	1.06206	0.490237	0.461589	39.3	42.3	22.8	39	48.2	32	35.7	36.4	18.8	19.2	12	20.3
1435358_at	Cuedc1	BB400076	0.597827	0.000720604	1.26562e-05	1.05003	0.48459	0.461503	612	428.8	462.7	537.4	551.7	489.7	585.5	516.1	225.6	255.3	250.1	258
1420772_a_at	Tsc22d3	NM_010286	0.53295	2.31883e-05	7.42252e-05	0.956891	0.441507	0.461397	3206.5	2656.4	2994.1	2755.5	2659	2994.7	2428.4	3029.8	1292.3	1230.5	1448.4	1155.8
1420018_s_at	Tspan8	C76990	0.0379011	0.00125306	0.00120098	0.647059	0.298529	0.461364	21.2	19.7	12.6	14.5	11.8	9.7	13.3	9.2	5.4	6	4.2	4.7
1423112_at	Ube2d3	AK009276	0.374182	0.0153551	9.99017e-06	1.13284	0.522464	0.461197	436.1	350.8	239.2	467.4	444.4	425.5	410.2	411.8	237.7	168.9	186.9	186.8
1423619_at	Rasd1	BB217136	0.790273	0.00943566	0.00490002	0.948129	0.436931	0.460835	211.4	127.1	222.5	131.1	113	206.4	156.7	180.1	64	85	82.1	71.3
1453744_a_at	Ankrd40	AK017451	0.792379	0.000900571	3.46314e-06	0.974726	0.449125	0.46077	392.8	369.4	255.5	359.2	335.8	354.9	338.6	312.8	152	145.8	145.5	175.1
1458273_at	Hnrnpd	AI843818	0.0867596	0.000793595	0.00340135	0.806211	0.371429	0.460709	22.6	17.4	22.7	17.8	18.9	16.9	16.1	13	5.2	6.4	11.6	6.7
1424718_at	Mapt	M18775	0.444556	0.00766136	0.00435951	0.865547	0.398702	0.460636	229.6	163.5	114.7	201	148.7	123.4	145.7	195.7	100.9	71.1	56.3	54.3
1455014_at	Hint3	BM213104	0.727435	0.0013226	3.42369e-06	0.963286	0.443691	0.460602	652.7	553.7	426.5	668.7	575.7	533.8	584.9	522.7	280.7	251.1	231.5	257.9
1459379_at	---	BB483267	0.895213	0.00363278	0.00291981	1.01342	0.466719	0.46054	106.7	96	75.9	101.5	101.7	95.8	78.9	108.8	42.3	23.4	46	65.7
1434718_at	Cul3	BM198837	0.977406	0.00221124	3.24985e-06	1.00305	0.461745	0.460343	324.4	311.3	198.1	282.4	291	268	277	283.6	115.2	144.5	140	115.7
1423979_a_at	Slc25a29	BC006711	0.271661	4.23311e-05	9.75497e-05	0.952193	0.438158	0.460157	60.2	54.4	54.9	58.5	50.7	55.9	52.1	58.4	21.7	25.6	32.3	20.3
1432461_at	Eya4	AK007097	0.341464	0.00141999	0.00217704	1.11714	0.514056	0.460156	36	42.3	32.2	38.9	46.1	44.8	30.8	45.2	14.4	21.6	24.9	15.9
1442379_at	Fam196b	BB020678	0.0949305	0.00265957	0.00100149	0.722317	0.332198	0.459906	48.3	38.7	31.4	57.7	36.6	25.5	32.2	32.9	15.4	19	10.9	13.2
1447934_at	9630033F20Rik	BB128741	0.0171389	0.000423505	0.00199839	0.607819	0.279505	0.459848	123.3	106.6	73.3	108.6	46.1	72.6	73	58.6	27.4	31.3	28.1	28.3
1430929_at	9430082L08Rik	BB102433	0.498075	0.00589885	0.00986036	0.867113	0.398662	0.459757	35.8	18.5	26.9	23.4	24.3	17.4	18.1	30.9	13	8.4	9.8	10.5
1417888_at	Trim13	NM_023233	0.710741	0.000293724	0.000262665	0.960985	0.44173	0.459663	258.8	248.7	199.2	287.8	286.5	219.8	211.5	237.9	106	114	107.1	112.2
1427225_at	Epn2	AF057286	0.528345	0.000485209	0.000136467	0.956852	0.439759	0.459589	375.5	287.4	354.1	311	313.1	340.2	308.1	309.3	119.1	134.4	200.6	129.9
1458193_at	Pmp2	AV278565	0.00381542	0.0121579	0.000333935	1.38223	0.634907	0.459337	190	157.3	166.4	204.2	243.3	258.2	221.1	269.7	153.4	121.1	94.1	87.2
1446244_at	Zyg11b	BB077439	0.745228	0.00133159	2.56758e-06	0.966393	0.443887	0.459323	190.3	158.7	121.9	186.7	160.4	161.9	164.8	148.4	67.8	79.3	78.7	66.1
1435800_a_at	Csda	BB779100	0.834923	7.65619e-05	5.15109e-07	1.01241	0.464908	0.459211	9623.6	8484.3	7509.6	9283.6	8932.8	8371.8	9127.2	8902.3	4435.7	3804.9	4080.6	3904.6
1424451_at	Acaa1b	BC019882	0.202629	0.0027504	0.00653691	1.23121	0.56492	0.458834	22.4	25.5	20.4	19.5	35.9	26.3	25.9	20	10.4	15.6	14	9.6
1452993_at	5430416O09Rik	AK017317	0.0255368	0.00193706	0.00152369	0.625253	0.286869	0.458805	33.3	25	19.5	21.2	15.7	16	16.6	13.6	10.3	4.8	8.5	4.8
1451961_a_at	Mbp	L07509	0.355792	0.000834722	0.00714393	0.86866	0.398178	0.458382	576.6	540.9	735.6	528.5	628.3	619.8	419.9	400.8	333.2	226.3	189	199.8
1440490_at	---	BB521778	0.148445	8.10518e-05	0.000266644	1.12841	0.517021	0.458184	68.2	73.9	80.2	74.4	95	70	83.2	86.6	33.8	33	44.5	42.1
1434834_at	Socs7	BG067098	0.998599	0.000402502	4.91299e-06	1.00015	0.458246	0.458177	589.4	464	418.3	532.9	479.9	487	549.1	488.9	230.3	234.3	244.9	209.1
1443196_at	---	BB473548	0.852077	0.00216742	4.85603e-05	0.980722	0.449344	0.458176	152.2	121.8	94.7	118.9	126.6	119.5	114.1	118	51.3	68.9	57.3	41.6
1437071_at	Eif1ax	BB471576	0.0561542	3.84848e-05	6.01329e-07	0.874454	0.400298	0.45777	257.8	201.5	247.4	231.6	207.1	209.7	204.4	199.3	84.3	104.7	88.7	97.9
1418258_s_at	Dynll2	NM_133796	0.255196	0.000847816	4.52473e-06	1.10533	0.505755	0.457558	2902.2	2898	2167.2	3171.4	3326.1	2961.9	3087.5	2936.6	1494.2	1472.5	1435.9	1230.9
1451803_a_at	Vegfb	U48800	0.414046	0.0014877	2.96145e-05	1.08531	0.496238	0.45723	579.9	575.1	414.3	636.7	588.8	621.4	648.4	535.6	239.3	305.3	255.4	294.7
1426502_s_at	Gpt	AK008086	0.00147993	0.0105967	0.000731309	1.33851	0.611988	0.457217	183.6	201	174.1	188.7	278.7	244.4	232.2	245.1	143.2	66.8	146.8	100.6
1429870_at	Tnik	BB021125	0.891187	0.00127661	1.59567e-06	1.01379	0.463474	0.45717	112	90.7	84.5	126.2	103.2	105	111.8	99.1	47.4	52.3	46.9	45
1438426_at	Shisa4	BF468228	0.759785	0.00662729	1.90859e-06	0.955126	0.436638	0.457152	1776.8	1435.6	1006.5	1985.1	1549	1548.1	1425.4	1403.1	619.9	682.5	726.4	680.1
1450184_s_at	Tef	NM_017376	0.279524	0.000912636	6.43502e-05	0.875334	0.399921	0.456878	236.4	321	206.9	246.4	225.2	249.5	201.9	208.1	98.9	104.6	85.9	114.8
1425143_a_at	Ndufs1	BC006660	0.640865	0.00185109	1.97426e-06	1.0505	0.4796	0.456546	1784.6	1640.6	1128.3	1779.7	1794.5	1620.7	1565.1	1672.7	762.5	729.6	754	791.3
1441009_at	4732491K20Rik	BB749614	0.0193617	0.000814596	0.00403759	0.678267	0.309659	0.456545	33.1	44.6	31.5	31.6	25.4	19	24.5	26.6	15.1	5.8	8.1	14.6
1428332_at	Pik3ip1	AW556858	0.0242516	8.61197e-07	1.31168e-06	0.897476	0.409708	0.456511	513.6	477.7	523.9	540.9	472	485.4	455.9	432	192.9	220.1	219	210.4
1434897_a_at	Slc25a4	AV327862	0.160491	9.01022e-05	1.86439e-07	1.08844	0.496807	0.456442	5146.6	4910.4	4004	4779.9	5234.6	4975.4	5002.4	5294.7	2345.8	2502.3	2175.3	2336.9
1446198_at	---	BB198174	0.422783	0.00524916	0.000308133	0.881125	0.401996	0.456231	29.1	32.1	16.9	32.1	24.4	26.1	25.7	20.9	8.6	9.1	12.5	14.1
1439798_at	Hoxc10	BB779859	0.585456	0.00367546	7.10201e-05	1.06203	0.484369	0.45608	487.5	341.5	325.1	458.1	445.7	384.3	440.8	441.4	198.9	140.3	227.1	214.6
1428650_at	Tns1	AK003780	0.602023	0.000222045	6.45878e-07	0.961491	0.438477	0.456039	2280	1782.1	2294.5	1823.3	1967.3	2012.8	2000.5	1884.3	898.2	1009.5	848	831
1457155_at	Aldh2	BB303662	0.486471	0.000656206	7.23218e-05	0.925589	0.422075	0.456007	73.1	58.9	47.4	62.5	50.2	63.2	52.2	58.3	24.3	27.1	23	27.7
1435875_at	Prkab2	AV223660	0.406644	0.00298071	3.98072e-06	0.886675	0.404275	0.455944	832.3	760.4	443.1	720	668	585	580.9	609.6	274.8	296.4	271	271.9
1453487_at	Dhdh	AK005050	0.49028	0.000231919	0.000152724	0.941789	0.429213	0.455742	123.5	164.2	135.6	133.3	123.1	137.1	117.2	146.8	71.7	63.8	47.7	55.7
1445092_at	---	AW557930	0.0300628	0.000446684	0.00846977	0.653131	0.297456	0.455431	45.6	60.6	57.3	40.9	26	27.6	35.8	44.1	12.1	19.3	18.7	10.7
1415966_a_at	Ndufv1	NM_133666	0.397852	0.00129556	1.26582e-10	1.08146	0.492112	0.455043	2712.1	2265.6	1796.1	2645.2	2522.8	2562.8	2558.8	2541.9	1123	1172.9	1177.9	1161.4
1423253_at	Mpz	AI385618	0.369785	0.0112592	0.00352344	1.12061	0.509702	0.454844	1261	912.1	1424.9	1137.9	1613.1	1309	1160.7	1224.3	957.5	452.4	532.7	471.3
1424746_at	Kif1c	BC016221	0.672852	0.00130429	6.58048e-06	1.04158	0.473647	0.45474	1853.5	1394.4	1223	1575.8	1507	1641.3	1491.9	1657.9	738.3	641.8	818	665.9
1449001_at	Ivd	AV221988	0.775114	0.00158852	0.000204486	1.03424	0.470119	0.454556	457.4	439.7	293.5	439.2	495.6	423	372.7	394.3	198.5	216.8	182.7	168.2
1428151_x_at	Ccbl1	AK008165	0.533054	0.000100073	0.000751288	0.94277	0.428462	0.454472	127.1	135.8	115.6	145.7	139.7	97	132.8	124.7	42.6	65.8	62.6	53.6
1431825_at	Srpk3	AK004696	0.530445	0.000339697	1.71194e-05	0.943618	0.428733	0.45435	96.3	127.9	96.4	122.8	110.1	93.2	103.9	111.2	50.6	51.6	44.1	43.8
1420137_at	---	AI427540	0.266261	0.0100026	0.00914931	0.827879	0.375758	0.45388	27.6	14.6	20.8	19.5	19.5	17.6	17	14.2	9.4	11.3	9	1.3
1434480_at	4930402E16Rik	BB667201	0.325191	0.000970789	0.000216966	1.11899	0.507851	0.453846	442.3	487.1	327.3	450.1	491.6	430.4	563.5	424.4	208.8	228.7	224.7	204.6
1436891_at	Usp15	AW536567	0.911539	0.0061467	0.00230553	0.983348	0.445995	0.453547	60	59	36.7	66.5	60.5	43.5	63.8	50.7	34.6	21.9	17.4	25.2
1448418_s_at	Dcaf11	NM_133734	0.60017	0.000345423	7.13286e-07	0.957851	0.434337	0.453449	1969.1	1739.8	1408.3	1972	1701.5	1733.8	1725.4	1629.7	746.5	749.8	876.1	706.7
1431714_at	2310015D24Rik	AK009355	0.835716	0.0213097	0.00183014	0.955949	0.433418	0.45339	49.7	63.2	24.1	60.5	52.5	56.9	36.4	43	22.8	19.4	25	18.4
1423269_a_at	Nedd4l	BB663717	0.971468	6.89317e-05	2.22304e-05	0.997472	0.452103	0.453249	773.7	687.2	596.3	712.3	771.3	695.2	646.2	649.8	318.1	339.2	318.5	276.3
1443873_at	4933403F05Rik	BE948877	0.762122	0.000237589	0.000190148	0.974708	0.441634	0.453094	45.1	34.4	38.1	36.6	34.8	40.7	41.4	33.4	20.1	15.9	13.3	18.8
1450381_a_at	Bcl6	U41465	0.237275	0.000740257	0.000189201	1.13995	0.516413	0.453012	349.4	248.9	274.4	318.4	380.6	361	276.9	339.3	163.1	154.3	142.1	155.6
1435757_a_at	Uqcrc2	AV082188	0.263058	0.00233579	7.93184e-08	1.12134	0.50788	0.452921	3547.9	3617.1	2305	3513	3680	3738.5	3486.2	3653.7	1715	1701.4	1566.7	1610.7
1430251_at	D330022H12Rik	BB738310	0.0789776	0.0281677	0.00349386	1.33853	0.606238	0.452913	34.5	42.2	47.1	30.1	62.4	56.8	42.1	44.7	23.2	25.8	13.5	30.8
1416858_a_at	Fkbp3	NM_013902	0.925231	0.000533204	7.60111e-06	1.00828	0.456657	0.452906	1689	1638.6	1184.5	1670	1686	1459	1586.9	1501.4	728.3	765.6	612.1	717.1
1440769_at	---	BM936071	0.0590794	0.0287704	0.00084369	1.30105	0.589185	0.452854	40.9	29.8	26.8	26.4	46	39.2	35.7	40.3	19	11.6	16.9	25.5
1416020_a_at	Atp5g1	NM_007506	0.282524	0.00254985	2.60421e-06	1.12247	0.508028	0.4526	4066.1	3440.6	2641.8	4169.8	4037.4	4065.1	4273.2	3696.1	1696.7	1835.9	1933	1808.5
1456387_at	Nol4	AV323033	0.0978336	0.0031484	0.00598351	0.780182	0.353075	0.452555	19.9	24.9	16.7	26.3	17.1	18.1	14.2	19.1	2.1	11.3	9.5	8.1
1459238_at	---	AV319481	0.393557	0.00227996	0.00423359	0.862141	0.390157	0.452545	444.5	324.8	317.2	262.7	214.5	310.4	267.7	370.6	92.1	148.7	141.3	144.3
1442473_at	---	BG070998	0.776035	0.00677338	0.00029533	1.03663	0.469017	0.452444	111.5	95.2	61.6	94.8	105.5	90.1	92.4	88.4	32.8	35.5	58.1	43.9
1443219_at	---	BM232535	0.473497	0.000364779	3.60651e-06	0.934803	0.422912	0.452408	1412.6	1292.6	1020.1	1497.3	1236.3	1312	1214.3	1119.5	523	580.8	546.8	558.1
1459111_at	4831440E17Rik	BB555268	0.211397	0.0636761	0.00893031	1.31206	0.592908	0.451892	23.2	10.4	17.6	19.3	18.5	25.6	30.1	18.3	6.3	10.8	10.2	14.5
1429205_at	Mllt3	AK011386	0.0743218	0.00080459	0.000287502	0.741631	0.334996	0.451702	369.8	299	248.3	406.2	233.6	289.1	204.4	254.3	109.1	113	114.4	106.8
1431002_x_at	Fahd2a	AK002291	0.354277	0.00253705	0.00041466	1.11194	0.502198	0.451642	87.2	66.5	60	82	70.6	87	94.1	77.1	44	29.1	43	32.4
1436169_at	---	BB428892	0.441866	0.0253526	0.00429691	1.13538	0.512753	0.451613	50.1	38.1	25.5	39.2	47.3	33.7	41.6	51	23.3	28.1	11.1	15.9
1449272_at	Cadm3	AY059393	0.943781	3.10367e-05	1.62273e-05	1.00425	0.453465	0.451547	153	145.9	159.9	130	156.6	154.7	148	132	73.7	70.9	59.6	62.8
1444559_at	Phtf2	BB710932	0.217635	0.00239499	0.000898875	1.16252	0.524883	0.451505	34	38.3	27.7	28.6	36.4	32.3	45.6	35.2	20.7	18.9	14.8	13.1
1455650_at	---	AA016705	0.0145732	0.0455966	0.00161091	1.41355	0.638095	0.451412	57.5	84.7	68.7	62.1	83.5	105.2	107.3	89.9	62.7	34.2	27.9	49.4
1433604_x_at	Aldoa	BG065457	0.504191	6.5511e-06	4.01928e-08	0.972693	0.439027	0.451352	12381.5	11457.2	10604.7	12419.3	11383.1	11619.4	11537.9	11042.6	5517.2	5117	4951.7	4988.1
1431098_at	Clip1	AK014540	0.127902	0.00023397	3.46027e-06	0.857378	0.386957	0.451326	751.5	699.2	518.1	705.4	602.9	598.6	554	537.3	280.5	272.7	240.9	240.7
1450017_at	Ccng1	BG065754	0.620806	0.00570499	2.98437e-05	1.06845	0.482135	0.451249	1005	1077	582.5	954.4	1016	1065	904.2	881.4	433.4	483.2	401.4	426.8
1452646_at	Trp53inp2	AK003956	0.784601	0.00275822	6.43411e-05	1.03508	0.466971	0.451147	2654	2501.5	1768.7	3071.5	2809	2313	2854.5	2369.8	1221.2	1186.4	1160.1	1100
1436109_at	AI317395	BE980249	0.324074	0.00124181	0.00779544	0.853532	0.384964	0.451025	48.7	34.7	37	33.9	42.2	34.9	23	31.6	19.3	8.4	16.7	15
1428322_a_at	Ndufb10	BI905689	0.610148	0.00197654	2.53256e-06	1.05681	0.476386	0.450779	2733.5	2552.5	1809.3	2981.2	2750.6	2620.4	2832.5	2445.4	1183.9	1220.7	1173.8	1221.9
1455589_at	1700100M05Rik	BF018849	0.718535	0.000207183	2.65432e-05	1.02805	0.46335	0.450708	303	256.3	251.7	322.7	278.9	289.9	324.7	272	136.5	145.4	109.7	133.7
1422103_a_at	Stat5b	BC024319	0.452275	0.0021781	3.26066e-05	0.90432	0.407286	0.450378	898.5	821.7	514.1	851	736	640.6	757.2	656.3	350.3	316.4	260.3	329.6
1418174_at	Dbp	BC018323	0.00192326	1.05075e-05	4.48307e-06	0.752024	0.338481	0.450094	1674.7	1861.6	1892.7	2082.2	1459.4	1434.8	1430.9	1323.5	615.8	602.3	751.8	572.5
1451194_at	Aldob	BC024112	0.133954	0.0107851	0.00272879	0.677561	0.30484	0.449907	48.6	53.1	36.4	21	25.2	23.8	32	26.8	7	17.8	14.4	9.3
1458491_at	4930422I07Rik	BI650220	0.963171	0.00129126	6.98813e-05	1.00486	0.451579	0.449396	81.4	75.3	52.9	78.5	79.7	64.9	75.5	69.4	38.8	33.3	26.7	31.3
1426256_at	Timm17a	AF106620	0.357791	0.00448215	8.92521e-07	1.11527	0.501134	0.449338	2165.5	1968.6	1319.9	2306	2222.8	2070.6	2286.1	2075	981.7	1003.6	995.7	907.8
1460466_at	1700047I17Rik1 /// 1700047I17Rik2	BB824055	0.0835023	0.0833479	0.00160632	1.41996	0.637998	0.449307	127.9	108.2	215.7	193.5	222.8	250.5	267.7	175.3	136.2	85.9	89.9	99.7
1457305_at	Btrc	BI737243	0.0792383	0.000109162	0.000222013	0.870893	0.391283	0.449289	168.9	149.8	133.3	153.7	147.2	128.5	131.8	120	47.6	76	66.8	46.6
1456854_at	Neurl1a	BB319030	0.817707	0.000710503	0.000134463	0.976744	0.438737	0.449183	75.9	65.9	59.8	86.5	72.6	78.8	60.8	69.2	38.7	31.3	28	28.4
1418876_at	Foxd1	BB662927	0.0286606	0.00134448	0.00240177	0.65994	0.296338	0.449037	129.5	113.7	176.9	115.1	92.5	100.3	87.5	72.9	26.5	25.9	54.4	51.8
1447891_at	---	BI466416	0.0518263	0.00617135	0.000209529	0.570488	0.255855	0.448484	632.8	413.1	265.8	404.9	250	225.3	245.9	258.1	121.7	100.8	144.7	72
1440913_at	BC037704	BB019247	0.439834	0.0333307	0.00894301	0.817235	0.366477	0.448436	18	16.3	32.2	39.1	17.8	26	19.4	23.1	13.9	6.3	4.4	14.1
1432279_at	4930452L02Rik	AK015448	0.0234301	0.00081685	0.00191577	0.635309	0.284794	0.448276	18.4	17.8	25.5	15.9	14.4	9.5	13.1	12.3	6.2	6.3	6.4	3.2
1458328_x_at	---	BE993003	0.0442605	0.00346154	0.00879894	0.846852	0.37954	0.448177	37.6	40.2	48.1	39.3	32.4	36.2	35.2	36.1	2.6	26.8	16	17.3
1452638_s_at	Dnm1l	BC027538	0.772241	0.00370995	5.61659e-05	1.03845	0.465298	0.44807	83.9	83.1	50.6	89.3	74.4	91.4	79.6	73.3	32.8	33.8	37.9	38.3
1448927_at	Kcnn2	NM_080465	0.61891	0.0103908	4.24418e-05	1.07887	0.483316	0.447985	28.7	19.7	18.1	32.4	22.6	27.9	28	28.2	12	11.4	12.8	11.6
1441752_at	Art3	BB214143	0.365532	0.0275269	0.00564537	1.19382	0.53467	0.447866	28.3	32.1	39.9	19.4	45.6	25.7	37.5	34.1	10.2	17.7	20.8	15.3
1426586_at	Slc25a11	AI647500	0.273012	0.00421832	1.50531e-07	1.13405	0.507899	0.447864	1824.3	1631.1	1114.5	1899.5	1860.3	1884.8	1849.4	1742.1	789.4	851.8	788.5	856.1
1428021_at	Mccc2	BI155184	0.953375	0.0114335	0.00155236	0.990268	0.443363	0.44772	87.8	123.4	60.6	98.1	87.9	105.5	99.3	73.6	36.6	43.7	27.6	56.1
1422578_at	Cs	AB056479	0.296834	0.000874534	1.75644e-07	1.097	0.491034	0.447616	3976.4	3456.8	2678.6	3795.8	3975.3	3735.6	3876.4	3669.3	1628.6	1774.5	1767.9	1658.1
1431074_a_at	Pitpnc1	BI654600	0.935881	0.00496491	0.000538842	1.01249	0.453202	0.447613	273.3	234.5	143.4	221.7	258.1	187.5	244.1	194.1	87.4	108.4	101.9	97.9
1425745_a_at	Tacc2	BC004057	0.589733	0.00115642	3.84041e-05	0.949933	0.425195	0.447605	6106.8	4304.7	4327.8	5387.7	4856.8	4732.7	4894.6	4635.2	2663.5	1839.6	2410	1644.8
1422795_at	Cul3	AV273804	0.44493	0.000849519	2.90578e-07	0.920774	0.412107	0.447566	656.1	620.7	412.4	595.4	533.3	549.1	521.8	499.4	233.1	234.9	249.8	223.7
1439087_a_at	Pik3ip1	BB030508	0.120707	1.19325e-05	5.30578e-06	0.911798	0.407978	0.447444	343.3	387.8	320.2	362.5	333.3	343.5	308.1	304.2	130.3	163.2	142.2	141.1
1426884_at	Rmnd5a	BG795169	0.430665	0.00017629	5.93536e-07	0.937726	0.419422	0.447275	2199.8	1869.7	1567	2031.2	1924.9	1742.5	1766.2	1756.6	766.5	802.6	841.4	805.5
1453522_at	6530401N04Rik	AK016300	0.524333	0.000629422	5.9202e-06	1.06058	0.474259	0.447168	87	104.9	79.6	113.1	90.7	105.4	105.5	106.3	45.9	46.2	44	46.3
1419171_at	Fam174a	BB667295	0.175741	0.00166462	0.00160368	1.1605	0.518493	0.446783	31	39.5	37	35.8	44.9	31.7	45.2	44.5	22.7	22.8	11.7	17.1
1431432_at	Cfl2	AW986926	0.709049	0.00856327	0.000125026	0.93633	0.418154	0.446589	301.8	174.8	168.8	284.4	236.4	192.8	246.1	195.3	97.1	98.3	98.3	95.1
1426424_at	Sugt1	BE853371	0.0205665	4.06977e-05	3.74888e-05	0.83361	0.371842	0.446062	338.3	282.4	275.2	307.3	261.4	262.9	231.5	247.2	110	132.7	121.4	83.3
1445420_at	---	BM238940	0.309719	0.000497663	0.000403441	0.878327	0.391318	0.445527	193.4	151.4	126.6	159.8	138.8	125.5	168	122.1	65.6	52.9	62.4	66.1
1423785_at	Egln1	BE995700	0.457371	0.000740672	2.15407e-06	1.07012	0.476629	0.445397	1620.5	1373.3	1075.9	1443.6	1524.3	1408.2	1574	1393.4	648.5	673.8	685.6	619.9
1434580_at	Enpp4	AV280361	0.0685223	4.27826e-05	4.12463e-05	0.856536	0.381276	0.445138	464.5	417.4	358	407.2	397.8	339.6	343.1	330.3	174.8	175	138.9	139.3
1434647_at	Egflam	AV024806	0.140799	0.0277509	0.000135549	1.28413	0.571564	0.445099	118.3	130.1	60.2	114.1	112	149.6	146.2	135	54.4	63.4	63.3	60.5
1427600_at	---	BC025871	0.654391	0.00198036	0.000659846	1.05049	0.46757	0.445096	74.3	62.8	51.6	54.9	72.3	65.9	52.5	65.2	19.8	27.6	37.5	29
1432345_at	1700048F04Rik	AK006725	0.838135	0.170161	0.00302765	0.918261	0.408696	0.445076	28.4	7.9	16.9	4.3	10.2	13	13.5	16.1	6.4	8	5.6	3.5
1416368_at	Gsta4	NM_010357	0.405156	0.00182519	0.000424147	1.11463	0.495861	0.444864	168.4	227	151.1	166.2	236.1	176.8	169.7	211.8	93.4	90.9	88.2	80.9
1429630_at	Ezh1	AK003058	0.934628	0.0220014	0.00098095	0.983287	0.437326	0.444759	13.4	5.8	8.7	8	8.1	10.6	7.3	9.3	2.8	4.5	4.4	4
1429260_at	1810014B01Rik	AW985991	0.939415	0.00727678	0.000696003	1.01207	0.450124	0.444756	74.6	80.7	43.2	83.2	84.5	75.8	62	62.8	29	38.4	24.8	34.6
1434799_x_at	Aldoa	BG793658	0.870726	8.23001e-06	2.00415e-07	1.00682	0.447699	0.444667	14236.4	13078.9	12072.9	13988.1	13165.2	13499.2	14011.3	13064.5	6452.6	6000.1	5901.1	5542.7
1441839_s_at	BC024814	BB250824	0.285879	0.0210448	0.0039663	1.16594	0.518275	0.444514	39.9	38.6	23.5	34.8	33.9	45.8	44.6	35.2	17.9	8.7	17.1	27.2
1451651_at	LOC100044885 /// Vsig4	BC025105	0.122993	0.00210787	5.99304e-05	0.760956	0.338157	0.444384	1093.2	908.2	1558.6	994.4	824.3	953.7	926	761.7	337.8	389.9	429.5	382.9
1451050_at	Nt5c3	AV037573	0.941223	0.00118436	5.16788e-06	0.992414	0.440879	0.444249	643	567.1	422.9	660.6	565.4	533.1	564.4	613.3	236.7	253.3	288.4	232.8
1458176_at	Per3	BB021263	0.110167	9.76116e-06	2.21076e-05	0.920341	0.40871	0.444086	634.4	643.6	703.1	611.2	627.8	632.2	564.7	561.1	224	244	317	274.5
1426867_at	Dmrt2	BC027669	0.551489	0.000482007	0.00277368	1.07635	0.477788	0.443895	102.5	118.4	116.4	94.9	116.9	128.2	137	83.1	69.2	46.2	42	49.1
1418309_at	Tnfrsf11b	AB013898	0.0472291	0.000247965	0.00185033	0.779288	0.345829	0.443776	63.5	51.6	48.5	49.8	35	50.5	39.8	41	18.7	10.1	22	23
1436103_at	Rab3ip	AV235634	0.2554	0.000256131	0.000439898	0.877653	0.389446	0.443735	93.2	78.5	70.4	97.1	87.8	61.6	72.6	75.7	30.1	38.7	27.6	35.7
1428543_at	Ppat	AV305746	0.671441	0.0020821	0.00401356	0.932565	0.413599	0.443507	93.8	109.5	63.9	88.7	84	106	82.8	59.1	29	40.6	33	44.6
1458856_at	---	BB216476	0.376335	0.00652275	5.36963e-05	1.12769	0.5	0.443384	118.4	79.5	69	86.3	94.2	87.9	107.3	108.9	49.7	41.5	44.3	41.1
1437625_at	---	BM238035	0.44856	0.00713061	0.00122718	1.07481	0.476336	0.443182	36.4	29.9	26.3	38.4	32.2	37.5	35.3	35.8	15.3	13.1	9.4	24.6
1417867_at	Cfd	NM_013459	0.164933	0.00157324	0.00054226	1.1643	0.51587	0.443075	6569.1	6453.7	7413.1	5285.3	7494.3	8902.9	6919.8	6630.1	4396.9	2937.2	3125.5	2809.2
1450699_at	Selenbp1	NM_009150	0.98979	0.000294399	3.6426e-06	0.998935	0.44252	0.442992	654.3	631.7	863.2	761.4	762.3	770.9	692.7	681.6	311	342.8	300.2	334
1451002_at	Aco2	AA034553	0.546996	0.000897156	3.90585e-06	1.05841	0.468495	0.442638	4274.4	4403.4	3385.8	5187.4	4690.8	4658.2	4761.4	4148.3	1852.2	1980	2220.2	2029.6
1457446_at	Opcml	BB383296	0.0184023	0.00304989	0.000325604	1.35154	0.598161	0.442577	47.5	51.7	37.6	48.1	62	74	55.5	58.4	32	30	20.8	27.8
1429182_at	5430400D12Rik	AK017243	0.154585	0.472729	0.00975788	1.56971	0.694712	0.442573	20.6	8.4	7.9	4.7	13.8	16.6	18.7	16.2	9.2	6.3	1.5	11.9
1430113_at	Sh2d6	AK016886	0.8336	0.000349018	0.000263351	0.979322	0.433416	0.442568	93.2	97.9	72	99.6	87.6	90	102.7	74.9	31.3	46.4	40.1	39.4
1420542_at	Dnajc28	BC005604	0.17573	0.000244652	0.00249792	0.833475	0.368825	0.442514	59.7	69.8	51.3	54	56.2	57.5	45.1	36.9	14.5	25.6	24.3	22.2
1436818_a_at	Msi2	BB479807	0.622675	0.00110193	0.000450249	1.05765	0.467869	0.442365	773.9	695.7	571.8	848.3	736.1	636.7	898.6	784.9	361.4	262.7	398.4	329.5
1427864_at	Hist1h3b /// Hist1h3d /// Hist1h3e /// Hist1h3i	Z30939	0.172227	0.0176883	0.000765638	0.657478	0.290834	0.442348	55	38.5	16.8	34.8	27.9	25.4	21.2	20.9	8.3	8.6	11.7	13.6
1442909_at	---	BB558291	0.892653	0.00190686	7.70943e-07	0.984985	0.435435	0.442073	75.7	58	48.7	50.7	60	56.5	57.5	55.6	24.7	22.5	26.1	28.2
1440844_at	Tob1	AA242096	0.0151527	0.000301811	1.15313e-05	0.68843	0.3042	0.441875	201.9	179.6	128.4	168.6	112.7	113.8	126.2	114.4	43.3	61.1	53.4	48.6
1429073_at	2210015D19Rik	AK005556	0.365656	0.00237059	5.11974e-07	1.09762	0.484935	0.441806	194.4	171.3	118.7	179.4	180.1	187.5	180.4	180.6	75	86.4	88.7	71.8
1438033_at	Tef	BB530740	0.118846	1.34147e-05	9.55396e-05	0.887277	0.391914	0.441705	349.4	298.7	318.7	294.7	279.4	314.6	284	241.3	109.6	140.2	134.7	109.9
1444520_at	Fryl	AW324422	0.925656	0.00268695	0.00308903	0.988224	0.435721	0.440914	28.9	28	19.3	25.7	29.1	28.7	22.5	20.4	6.4	10.5	11.5	16
1417285_a_at	Ndufa5	NM_026614	0.294153	0.00384913	1.25725e-08	1.12709	0.496824	0.440802	1968.5	1727.8	1297.3	2232.7	2059.1	1975.1	2071.3	2039.2	866.6	945.6	889	889
1436656_at	Tmem150c	BE943567	0.0157022	0.0792916	0.00167229	1.65011	0.727205	0.440701	35.7	32.3	24.3	42.6	53.2	57.5	68.9	43	19.2	25.5	23.9	29.5
1448423_at	Tmed4	BB463345	0.680488	0.0108527	0.00094702	1.07547	0.473918	0.44066	29.7	24.6	14.2	21.6	29.8	19.4	25.4	22.3	10.7	11.6	10.3	10.1
1435566_s_at	Araf	BG228947	0.281244	0.000509152	1.37768e-06	0.891277	0.392567	0.440455	880.8	854.1	590.7	889.9	746.6	749.3	693.8	676.2	322	341	295.7	303.6
1418738_at	Scn1b	BC009652	0.349826	0.0095691	9.25218e-06	1.14114	0.502611	0.440446	1630.4	1296.6	871.5	1621.6	1641.9	1390.6	1638.8	1513.8	639.7	734.1	678.2	672.2
1455765_a_at	Abcc8	BB515948	0.0545426	0.00047235	0.00345104	0.814346	0.35865	0.440415	46.1	53.9	42.2	47.4	39	46.3	35	34.1	9.5	26.6	18.6	13.3
1436952_at	Klf9	BE995545	0.0409828	5.81462e-07	3.00779e-06	0.943126	0.415314	0.440359	800.1	782.5	764.5	775.6	748.9	772.5	721.4	702.3	283.4	300.1	365.5	347.9
1442918_at	Nav3	AW123147	0.353595	0.0140744	0.000239599	0.807015	0.355105	0.440023	249.4	137.2	125.3	129.6	111.4	130.7	149.4	126.2	60.8	59.9	65	42.1
1460595_at	---	BB364454	0.337837	0.0699711	0.00302283	1.23837	0.544835	0.439963	23.1	32.2	11.5	21.3	24.7	21.3	33.8	29.3	12.2	15.2	7.4	13.2
1416632_at	LOC677317 /// Me1	BC011081	0.492878	0.0094172	5.74876e-05	1.10451	0.485906	0.439928	840.6	835.6	464.6	917.2	944.9	824.5	749.8	858.4	336.7	421.8	404.1	323.3
1437502_x_at	Cd24a	BB560574	0.552908	0.00212554	2.76845e-06	0.92732	0.407759	0.439717	836.2	922.7	522.3	755.4	694	726.9	658.7	736.3	278.6	334	287.7	337.9
1449128_at	Ccdc43	NM_025918	0.592689	0.0143063	0.00242552	0.891212	0.391792	0.439618	49.6	92.1	43.9	72.7	71.4	50	61.9	46.9	22.1	20	25	34.1
1433982_at	Usp28	BG075391	0.210128	0.00336177	3.3897e-05	0.811365	0.356622	0.439533	508.8	385.6	260.3	448.4	304.4	346.8	320.8	328.7	155.9	127.5	175.5	112.8
1460260_s_at	Kpna1	U20619	0.855272	0.00374768	1.91744e-05	0.97497	0.42837	0.439367	1069.5	896.9	573.2	1000.1	955.1	854.1	874.1	767.8	408.7	358.7	378.4	370.5
1455069_x_at	Slc25a4	BF225398	0.449632	7.04412e-05	4.5551e-07	1.04504	0.458509	0.43875	13445.6	12317.3	10683	13498.8	12867.6	13556.6	13226.8	12543	5449.1	6412.4	5611.3	5427.3
1432211_a_at	Fbxo9	AK018482	0.253189	0.000252697	1.41202e-05	1.10264	0.483748	0.438717	297	286.3	222.1	246.8	304.2	317.7	267.6	270.7	130.6	118.7	131.8	127.9
1435714_x_at	Il17d /// LOC100046772	BB809808	0.0458477	0.000213765	0.000152509	0.80221	0.351939	0.438711	108.6	138.3	154.2	132.8	110.4	100.1	118.6	99.2	41.7	62.1	37	47.1
1456930_at	Camsap1	BE989461	0.255787	0.00628498	3.17949e-06	1.14765	0.503476	0.438703	135.1	114.4	86.8	152.7	139.2	134.1	143.2	144.7	73	62.1	54.3	56.8
1459229_at	---	BB245259	0.686858	0.0133884	0.00928348	0.924731	0.40553	0.438538	22.8	16.7	12.8	12.8	11.7	16	19.3	13.2	3	7.5	10.1	5.8
1430308_at	---	BB093977	0.607797	0.0727425	0.00493575	1.1459	0.502339	0.438382	65.3	83.8	21	65	91.8	53.7	66.1	57.8	26	34.3	30.2	27.6
1457568_at	Hnrnpd	BB380198	0.196251	3.44546e-05	2.23964e-06	0.917518	0.401543	0.437641	250.5	228.8	197.1	243.8	226.5	202.8	204.5	210.5	87.8	96.6	83.5	101.6
1441387_at	BC030343	BB182811	0.455218	0.103971	0.0074184	1.18689	0.519417	0.437628	8.7	5.4	15.7	11.4	10.9	11.6	11.1	15.3	2.1	5.3	5.1	8.9
1422529_s_at	Casq2	NM_009814	0.0969648	0.00102247	8.47038e-06	1.1716	0.51244	0.437385	266.8	286.4	196.4	267.3	326	286.4	281.1	297.9	138.1	120.9	117.3	144.8
1455636_at	Lsamp	BB319385	0.0355056	0.183756	0.00333426	1.66722	0.729097	0.437312	23	54.2	49.6	52.6	87.7	60.1	90.5	60.8	36.5	40.2	28.3	25.8
1452485_at	Phospho1	AJ457190	0.904882	0.00124661	5.32123e-05	1.01259	0.442673	0.43717	261.8	269.7	174.8	247	249.1	266.1	232.2	217.9	82.2	112.8	121.2	105.8
1435991_at	Nr3c2	BQ174990	0.824519	0.00338054	0.000227789	0.968264	0.423196	0.437067	128.6	182.1	114.1	186.5	152.1	163.4	157.4	119	73	68.3	61.7	55.7
1419692_a_at	Ltc4s	NM_008521	0.187839	0.000935539	1.24648e-06	0.84406	0.368686	0.436801	387.4	276.2	444.4	321.4	313.1	299.9	309.7	283.8	137.7	118.5	144.7	126.1
1418068_at	Ndufa10	NM_024197	0.908783	0.0263635	0.00103944	1.02477	0.447414	0.436599	164.2	121.3	60	114.7	145.4	106.2	122.7	97.3	46.7	55.8	59.8	43.6
1434717_at	Cul3	BM198837	0.837548	0.00136484	9.35019e-06	0.97677	0.426324	0.436463	713.4	589	426.4	591.5	593.4	582.4	590.3	500.3	263.7	231.1	242.2	252.2
1441765_at	---	BB822342	0.454488	0.000366063	8.62305e-06	0.931034	0.406337	0.436436	56.6	55.5	41.3	61.2	46.3	47.8	52.3	53.4	22.7	19.8	24.4	20.3
1457704_at	Zfp385b	BE982894	0.0197979	0.000131345	0.000140453	0.712311	0.310564	0.435995	154.2	142.8	193.4	139.1	95.6	121.7	126.4	104.7	48.8	44.6	49.5	52.6
1455301_at	Wipf3	BG064092	0.105875	0.0014994	5.32519e-05	1.16966	0.509628	0.435705	137.2	101	102.8	126.4	152.5	132.5	133.5	128.2	53.8	74.6	50.4	59.4
1426938_at	Nova1	BB627486	0.0885095	6.83674e-05	3.77057e-06	0.859602	0.374073	0.435171	398.6	358.1	452.3	342.3	336.5	354.7	338.9	303.4	157.1	145.1	144	134.1
1440884_s_at	A530047J11Rik	BB218047	0.525221	0.00112314	1.20643e-05	1.06074	0.460715	0.434334	473.7	435.7	310.6	423.1	436.7	461.5	440.2	404.5	193.4	227	179.5	157.1
1427665_a_at	Nfic	AF358459	0.78149	0.00108298	2.30073e-06	1.02893	0.446789	0.434227	453.6	447.7	311.8	498	430.6	481.1	432.4	416.5	189.3	198.1	187.6	189.5
1424155_at	Fabp4	BC002148	0.0434639	0.00101131	0.000109881	0.684781	0.297026	0.433754	661.9	504.3	569.9	369.1	368.1	402.5	302.2	368.8	181.8	148.1	155.1	140.3
1427588_a_at	Dtna	X95226	0.376455	0.00163805	0.00210848	0.86676	0.375676	0.433426	153.3	141.5	95.3	109	123.7	129.4	95	84.5	43.2	60.8	39.4	44.1
1440292_at	D13Ertd666e	BG070282	0.100728	3.37994e-05	0.00317499	0.816629	0.353834	0.433287	62.4	73.3	64	63.7	53.3	69.5	42.5	49.8	24.1	22.9	15.9	30.3
1441523_at	Nf1	BB485186	0.296146	0.637804	0.00262429	1.66255	0.720165	0.433168	2.5	2.7	16.2	2.9	7.8	9.1	11.8	11.7	3.5	3.2	5.7	5.1
1421093_at	Slc7a10	NM_017394	0.0836572	0.00429642	0.000530506	1.27598	0.55262	0.433096	109.8	114.8	137.6	88.2	128.5	174.3	145.4	126.5	74	67	53.1	54.8
1458460_at	---	BB030901	0.0903611	0.000115075	4.3828e-05	1.13705	0.492152	0.432832	94.6	96.4	78.6	87.2	91.1	102.8	99	112.8	38	41.5	52.6	43.5
1417080_a_at	Ecsit	NM_012029	0.619635	0.000649022	5.83015e-06	1.04316	0.451477	0.432798	504.2	475.1	345.4	473.4	499.2	471.1	452.9	452.5	164.8	205.9	208.1	233
1436763_a_at	Klf9	AI267126	0.0119288	1.39945e-06	2.74011e-07	0.875528	0.378855	0.432716	1229.3	1110.1	1065.2	1118.5	984.9	1025.9	940.1	1009.2	419.9	399.7	459.8	434.2
1435283_s_at	Fam189a2	BE647179	0.985142	5.84883e-05	9.84401e-05	1.00118	0.433197	0.432685	183.7	193.8	173.7	208.5	192.2	171.2	183.7	213.5	69.4	91.8	99.3	68.6
1438483_at	Nos1	BB794641	0.00228202	2.36633e-05	5.45157e-05	0.694482	0.300404	0.432558	198.9	172.3	165.6	206.2	116.5	124.4	137.9	137.2	62.8	49.3	45.2	65.9
1459326_at	D9Ertd256e	BG066667	0.809492	0.00271909	7.29337e-06	0.970281	0.419601	0.432453	339.1	262.3	189.6	282.4	261.6	277.6	258.7	243.6	120.8	113.8	90.8	125
1459249_at	---	BB281511	0.494576	0.00102721	0.00124992	0.930469	0.402344	0.43241	31	33.1	37.6	26.3	29.7	30.2	24.8	34.4	14.6	11.2	7.7	18
1444141_at	Snx13	BB828008	0.720217	0.0120397	3.5243e-05	0.934347	0.40322	0.431553	150.9	134.2	80.2	193.7	124.5	140.9	142.6	114.3	56.4	55.7	57.7	55.6
1429533_at	Immt	BB222675	0.86839	0.000619835	4.24053e-05	1.01724	0.438549	0.431115	572.5	599.5	408	600.6	548.3	632.4	543.3	494.2	215.9	255.8	243.5	241.1
1425234_at	Col20a1	BE945716	0.916434	0.000370771	0.000876152	0.989813	0.426712	0.431103	94.4	97.3	74.6	87.1	103.1	92.9	78.8	75	43.7	47.1	34.9	25.1
1447338_at	---	BE979655	0.118857	0.000831983	0.000316408	1.16407	0.501833	0.431102	63.6	49.1	52.8	52.7	65.9	55.5	72.9	59.7	20.1	26.7	27.5	35.2
1423292_a_at	Prx	BG072867	0.352306	0.000345182	0.00134487	0.888739	0.382941	0.430881	697.5	622.2	826.2	596.3	734.7	670.1	518.8	513.5	339.4	238.7	256.8	215.2
[truncated: 1,631 more rows]

## Sheet: Microarray-DOWN_KEGG
Down-regulated gene_KEGG pathway (Pvalue<0.05)
Category	Term	Count	%	PValue	Genes	List Total	Pop Hits	Pop Total	Fold Enrichment	Bonferroni	Benjamini	FDR
[truncated: 58 more rows]
