# Supplementary material for: Epigenetic regulator UHRF1 orchestrates proinflammatory gene expression in rheumatoid arthritis in a suppressive manner
Source: J Clin Invest. 2022 Jun 1;132(11):e150533. doi: 10.1172/JCI150533 (PMC9151705; doi:10.1172/JCI150533)
Supplement: Supplemental table 2 [file jci-132-150533-s156.xlsx]

## Sheet: RNAseq-UP
Up-regulated gene		LOG2FC>1	p.value<0.05
Geneid	Chr	Start	End	Strand	Length	FLS_cont6	FLS_cont7	FLS_cont10	Ave.cont	FLS_KO3	FLS_KO4	FLS_KO8	Ave.KO	log2(fold_change)	p.value	q.value	rank	estimatedDEG
Gm19757	chr6;chr6;chr6	105481266;105484968;105492337	105483750;105485096;105492668	-;-;-	2946	24.1827	21.902	12.9537	19.6795	135.585	150.067	96.3314	127.328	2.69378	1.64663e-30	1.92821e-26	2	1
Gm11127	chr17;chr17;chr17;chr17;chr17;chr17	36055816;36056326;36056556;36057422;36057841;36058286	36056146;36056439;36056831;36057688;36058110;36058371	-;-;-;-;-;-	1344	11.5656	8.34364	8.96794	9.62574	69.2769	72.2543	48.1657	63.2323	2.71569	1.60561e-22	1.25345e-18	3	1
Gm1045	chr5;chr5	91987473;91994645	91987558;91995317	+;+	759	3.15427	4.17182	6.97506	4.76705	40.5765	48.1695	68.2347	52.3269	3.45638	8.12594e-22	4.75774e-18	4	1
Tnn	chr1;chr1;chr1;chr1;chr1;chr1;chr1;chr1;chr1;chr1;chr1;chr1;chr1;chr1;chr1;chr1;chr1;chr1;chr1;chr1;chr1;chr1	160085032;160088393;160097194;160098213;160104827;160105398;160107011;160110246;160114491;160116070;160118339;160120498;160122655;160125353;160126332;160130684;160139249;160140587;160144983;160146012;160147447;160153482	160086168;160088556;160097361;160098309;160104978;160105530;160107141;160110509;160114754;160116333;160118602;160120761;160122918;160125616;160126595;160130947;160139338;160140772;160145246;160146386;160147888;160153575	-;-;-;-;-;-;-;-;-;-;-;-;-;-;-;-;-;-;-;-;-;-	5809	24.1827	45.89	64.7684	44.9471	202.882	245.479	160.552	202.971	2.17498	7.62347e-21	3.57083e-17	5	1
Saa3	chr7;chr7;chr7;chr7	46711998;46712589;46715010;46715647	46712264;46712727;46715104;46715676	-;-;-;-	531	83.0624	79.2645	139.501	100.609	299.87	324.218	242.835	288.975	1.52218	1.67767e-17	6.54852e-14	6	1
Syt7	chr19;chr19;chr19;chr19;chr19;chr19;chr19;chr19;chr19;chr19;chr19;chr19	10389090;10413340;10417963;10421757;10426299;10430338;10435550;10439152;10442828;10443377;10443985;10448340	10389513;10413443;10418042;10421888;10426667;10430460;10435685;10439422;10442997;10443491;10444184;10453181	+;+;+;+;+;+;+;+;+;+;+;+	6966	36.7998	49.0189	54.8041	46.8742	114.802	117.645	111.383	114.61	1.28986	1.0996e-16	3.21909e-13	8	1
2310007B03Rik	chr1;chr1;chr1;chr1;chr1;chr1;chr1	93151355;93152917;93154487;93155979;93159601;93160802;93160889	93152100;93153273;93154640;93156204;93160350;93160870;93160948	-;-;-;-;-;-;-	2362	5.25711	1.04295	4.98219	3.76075	30.6798	45.3905	30.1036	35.3913	3.2343	2.31394e-16	6.02138e-13	9	1
Wnt5a	chr14;chr14;chr14;chr14;chr14;chr14	28505473;28511405;28511823;28513141;28518286;28522482	28506114;28511423;28511956;28513391;28518578;28525515	+;+;+;+;+;+	4373	178.742	175.216	173.38	175.779	301.849	424.263	351.208	359.107	1.03065	1.60932e-15	3.42639e-12	11	1
Csf3	chr11;chr11;chr11;chr11;chr11	98701313;98701504;98702026;98702380;98702802	98701419;98701676;98702133;98702526;98703629	+;+;+;+;+	1363	8.41138	8.34364	17.9359	11.5636	92.0393	108.381	46.1588	82.1932	2.82942	1.91031e-15	3.57895e-12	12	1
Eln	chr5;chr5;chr5;chr5;chr5;chr5;chr5;chr5;chr5;chr5;chr5;chr5;chr5;chr5;chr5;chr5;chr5;chr5;chr5;chr5;chr5;chr5;chr5;chr5;chr5;chr5;chr5;chr5;chr5;chr5;chr5;chr5;chr5;chr5;chr5;chr5;chr5	134702596;134704530;134705288;134705741;134706365;134706566;134707510;134707821;134707972;134710107;134711062;134712406;134712550;134713995;134715247;134715684;134716428;134716992;134718021;134718989;134719133;134721617;134722035;134722464;134724919;134725769;134726468;134728390;134729128;134729271;134729645;134731065;134732533;134736303;134737164;134739510;134747157	134703824;134704580;134705317;134705785;134706415;134706604;134707650;134707883;134708073;134710145;134711220;134712465;134712690;134714054;134715348;134715731;134716517;134717045;134718167;134719048;134719222;134721664;134722079;134722505;134724990;134725798;134726539;134728437;134729190;134729432;134729746;134731100;134732562;134736335;134737199;134739572;134747254	-;-;-;-;-;-;-;-;-;-;-;-;-;-;-;-;-;-;-;-;-;-;-;-;-;-;-;-;-;-;-;-;-;-;-;-;-	3781	75.7024	63.6202	74.7328	71.3518	155.378	139.877	185.639	160.298	1.16773	3.53602e-15	5.91526e-12	14	1
Il1a	chr2;chr2;chr2;chr2;chr2;chr2;chr2	129299610;129302873;129304673;129306464;129307883;129309055;129309921	129300899;129302997;129304846;129306692;129307931;129309109;129309972	-;-;-;-;-;-;-	1974	6.30854	3.12886	10.9608	6.7994	32.6591	43.5379	34.1174	36.7714	2.43511	1.09276e-13	1.52192e-10	16	1
Gm10845	chr14;chr14;chr14	79860521;79868320;79869012	79863552;79868511;79869176	-;-;-	3389	37.8512	32.3316	33.8789	34.6872	100.946	79.665	84.29	88.3004	1.34802	1.10472e-13	1.52192e-10	17	1
Niacr1	chr5	123863570	123865516	-	1947	3.15427	5.21477	5.97863	4.78256	30.6798	32.4218	26.0897	29.7304	2.63609	2.30822e-13	3.00325e-10	18	1
Cfb	chr17;chr17;chr17;chr17;chr17;chr17;chr17;chr17;chr17;chr17;chr17;chr17;chr17;chr17;chr17;chr17;chr17;chr17	34856374;34856880;34857004;34857219;34857492;34857668;34858037;34858498;34859009;34859230;34859442;34859936;34860286;34860524;34860763;34861028;34861731;34862052	34856582;34856929;34857136;34857319;34857568;34857821;34858154;34858595;34859146;34859331;34859573;34860074;34860422;34860625;34860936;34861213;34861964;34862514	-;-;-;-;-;-;-;-;-;-;-;-;-;-;-;-;-;-	2747	752.819	487.06	808.111	682.663	1426.11	1433.04	1309.5	1389.55	1.02538	4.26833e-12	4.54383e-09	22	1
Lcn2	chr2;chr2;chr2;chr2;chr2;chr2	32384637;32385419;32385706;32385956;32387028;32387580	32384884;32385520;32385825;32386041;32387164;32387739	-;-;-;-;-;-	853	39.9541	49.0189	57.7934	48.9221	115.791	205.647	118.407	146.615	1.58348	9.91593e-12	1.0097e-08	23	1
Podnl1	chr8;chr8;chr8;chr8;chr8;chr8;chr8;chr8;chr8;chr8	84125989;84126206;84127228;84127598;84127785;84128570;84129264;84130531;84131898;84132122	84126101;84126427;84127321;84127662;84127894;84128726;84129379;84131188;84132046;84132517	+;+;+;+;+;+;+;+;+;+	2080	3.15427	2.08591	0.996438	2.07887	17.8141	18.5267	24.0828	20.1412	3.27628	2.98654e-11	2.79779e-08	25	1
Xlr	chrX;chrX;chrX;chrX;chrX;chrX;chrX;chrX	53783748;53784492;53787090;53787883;53795468;53795773;53796143;53797632	53784172;53784590;53787189;53788000;53795502;53795836;53796268;53797696	-;-;-;-;-;-;-;-	1032	2.10285	0	1.99288	1.36524	12.8657	18.5267	21.0725	17.4883	3.67916	3.70485e-11	3.33721e-08	26	1
Marcksl1	chr4;chr4	129513581;129514717	129513916;129515981	+;+	1601	90.4223	66.7491	99.6438	85.6051	176.161	190.826	147.507	171.498	1.00242	4.68917e-11	3.92216e-08	28	1
A430078G23Rik	chr8;chr8;chr8;chr8;chr8;chr8;chr8;chr8;chr8;chr8;chr8	3353415;3364628;3380262;3381833;3384897;3386360;3386922;3387634;3388001;3388277;3388723	3353730;3364756;3380520;3381980;3385008;3386417;3386966;3387711;3388103;3388418;3390299	+;+;+;+;+;+;+;+;+;+;+	2967	12.6171	17.7302	9.96438	13.4372	40.5765	41.6852	38.1312	40.1309	1.57848	1.34459e-09	8.9972e-07	35	1
Serpinb2	chr1;chr1;chr1;chr1;chr1;chr1;chr1;chr1;chr1	107511423;107511510;107515464;107519652;107522147;107522692;107523065;107523797;107524537	107511478;107511584;107515640;107519771;107522275;107522809;107523207;107523961;107525600	+;+;+;+;+;+;+;+;+	2047	176.639	139.756	446.404	254.266	872.889	891.137	767.641	843.889	1.73071	7.0243e-09	4.11273e-06	40	1
Glipr1	chr10;chr10;chr10;chr10;chr10;chr10	111985448;111985778;111986589;111988800;111993441;111996858	111985682;111985804;111986674;111988885;111993680;111997264	-;-;-;-;-;-	1081	9.4628	32.3316	19.9288	20.5744	58.3905	62.0646	53.1829	57.8794	1.4922	1.24873e-08	6.55712e-06	44	1
Slc39a4	chr15;chr15;chr15;chr15;chr15;chr15;chr15;chr15;chr15;chr15;chr15;chr15	76612383;76612755;76613204;76613457;76613598;76613787;76614057;76614487;76614750;76615044;76615875;76616573	76612663;76612942;76613356;76613511;76613717;76613945;76614229;76614658;76614913;76615239;76616159;76616852	-;-;-;-;-;-;-;-;-;-;-;-	2226	15.7713	14.6014	22.9181	17.7636	44.5352	50.9486	39.1346	44.8728	1.33692	5.76031e-08	2.54541e-05	53	1
Plac8	chr5;chr5;chr5;chr5;chr5	100553733;100556480;100559752;100562625;100572145	100553988;100556595;100559876;100562762;100572205	-;-;-;-;-	696	18.9256	6.25773	29.8931	18.3588	83.1323	82.444	44.1519	69.9094	1.92901	7.50554e-08	3.196e-05	55	1
Mfap4	chr11;chr11;chr11;chr11;chr11;chr11	61485444;61485721;61486038;61486910;61487079;61487754	61485485;61485805;61486192;61487006;61487261;61488704	+;+;+;+;+;+	1513	53.6226	36.5034	35.8718	41.9992	77.1943	79.665	102.352	86.4038	1.04073	8.17585e-08	3.35927e-05	57	1
Sptbn2	chr19;chr19;chr19;chr19;chr19;chr19;chr19;chr19;chr19;chr19;chr19;chr19;chr19;chr19;chr19;chr19;chr19;chr19;chr19;chr19;chr19;chr19;chr19;chr19;chr19;chr19;chr19;chr19;chr19;chr19;chr19;chr19;chr19;chr19;chr19;chr19;chr19	4711223;4718819;4724080;4724630;4725901;4726140;4726582;4729062;4729302;4731274;4731926;4732388;4733654;4734039;4737342;4737811;4739107;4739591;4739853;4742333;4744048;4744466;4745109;4745458;4745780;4746566;4747712;4748059;4748594;4748938;4749402;4749634;4749783;4750021;4750481;4751149;4751501	4711644;4718997;4724231;4724803;4725992;4726220;4726697;4729174;4729489;4731391;4732084;4732690;4733807;4734909;4737479;4738567;4739309;4739681;4739999;4742596;4744272;4744555;4745369;4745588;4745984;4746940;4747956;4748197;4748678;4749134;4749544;4749709;4749833;4750241;4750654;4751191;4752352	+;+;+;+;+;+;+;+;+;+;+;+;+;+;+;+;+;+;+;+;+;+;+;+;+;+;+;+;+;+;+;+;+;+;+;+;+	8235	9.4628	9.38659	10.9608	9.93674	21.7727	37.0535	40.1381	32.9881	1.7311	1.16021e-07	4.32068e-05	62	1
9930013L23Rik	chr7;chr7;chr7;chr7;chr7;chr7;chr7;chr7;chr7;chr7;chr7;chr7;chr7;chr7;chr7;chr7;chr7;chr7;chr7;chr7;chr7;chr7;chr7;chr7;chr7;chr7;chr7;chr7;chr7	83932857;83937387;83942006;83943619;83943882;83947148;83948580;83951403;83952787;83955221;83955458;83957588;83958509;83961543;83963045;83963986;83973173;83975040;83982192;83983134;83987338;83987960;83989133;83992018;83997222;83998491;83999109;84003312;84086258	83935748;83937487;83942163;83943705;83944086;83947333;83948791;83951618;83952967;83955376;83955493;83957719;83958594;83961671;83963114;83964191;83973382;83975215;83982383;83983266;83987459;83988055;83989203;83992197;83997458;83998629;83999255;84003421;84086505	-;-;-;-;-;-;-;-;-;-;-;-;-;-;-;-;-;-;-;-;-;-;-;-;-;-;-;-;-	7114	402.695	277.426	775.228	485.116	1140.1	1233.88	1325.56	1233.18	1.34598	1.19875e-07	4.38668e-05	64	1
Col7a1	chr9;chr9;chr9;chr9;chr9;chr9;chr9;chr9;chr9;chr9;chr9;chr9;chr9;chr9;chr9;chr9;chr9;chr9;chr9;chr9;chr9;chr9;chr9;chr9;chr9;chr9;chr9;chr9;chr9;chr9;chr9;chr9;chr9;chr9;chr9;chr9;chr9;chr9;chr9;chr9;chr9;chr9;chr9;chr9;chr9;chr9;chr9;chr9;chr9;chr9;chr9;chr9;chr9;chr9;chr9;chr9;chr9;chr9;chr9;chr9;chr9;chr9;chr9;chr9;chr9;chr9;chr9;chr9;chr9;chr9;chr9;chr9;chr9;chr9;chr9;chr9;chr9;chr9;chr9;chr9…	108953745;108954330;108955195;108955443;108955629;108955892;108956130;108956362;108956561;108956793;108956987;108957214;108958092;108958324;108958563;108959237;108959491;108959936;108960165;108960514;108960952;108961346;108961555;108961780;108962157;108962366;108962600;108962865;108962985;108963103;108963218;108963888;108964050;108964221;108964413;108964587;108965050;108965158;108965301;108965438…	108953832;108954510;108955354;108955536;108955790;108956055;108956259;108956478;108956707;108956909;108957136;108957342;108958235;108958449;108958706;108959356;108959634;108960061;108960311;108960636;108961098;108961480;108961701;108961916;108962283;108962512;108962772;108962900;108963011;108963147;108963280;108963959;108964085;108964256;108964484;108964664;108965076;108965211;108965363;108965497…	+;+;+;+;+;+;+;+;+;+;+;+;+;+;+;+;+;+;+;+;+;+;+;+;+;+;+;+;+;+;+;+;+;+;+;+;+;+;+;+;+;+;+;+;+;+;+;+;+;+;+;+;+;+;+;+;+;+;+;+;+;+;+;+;+;+;+;+;+;+;+;+;+;+;+;+;+;+;+;+;+;+;+;+;+;+;+;+;+;+;+;+;+;+;+;+;+;+;+;+;+;+;+;+;+;+;+;+;+;+;+;+;+;+;+;+;+;+	9198	27.337	42.7611	63.772	44.6234	92.0393	130.614	91.3141	104.656	1.22978	3.06284e-07	9.45611e-05	75	1
Il12rb1	chr8;chr8;chr8;chr8;chr8;chr8;chr8;chr8;chr8;chr8;chr8;chr8;chr8;chr8;chr8;chr8	70808449;70809831;70810555;70811039;70812478;70813305;70813653;70814066;70814437;70815702;70816433;70816884;70817212;70819325;70819682;70820515	70808618;70809890;70810669;70811232;70812614;70813371;70813778;70814148;70814674;70815869;70816567;70817039;70817346;70819421;70819763;70821423	+;+;+;+;+;+;+;+;+;+;+;+;+;+;+;+	2872	1.05142	5.21477	3.98575	3.41732	22.7624	17.6004	11.038	17.1336	2.32589	6.32037e-07	0.00017212	86	1
Scin	chr12;chr12;chr12;chr12;chr12;chr12;chr12;chr12;chr12;chr12;chr12;chr12;chr12;chr12;chr12;chr12	40059771;40061157;40063212;40068915;40069269;40073302;40076937;40077471;40079596;40080932;40081642;40084285;40104927;40124567;40127881;40133910	40060627;40061217;40063289;40069036;40069446;40073472;40077027;40077592;40079811;40081020;40081774;40084377;40105076;40124728;40128035;40134228	-;-;-;-;-;-;-;-;-;-;-;-;-;-;-;-	2997	14.7199	12.5155	13.9501	13.7285	42.5558	40.7588	26.0897	36.4681	1.40946	9.13266e-07	0.000229785	93	1
AI662270	chr11;chr11;chr11;chr11	83223576;83224210;83224452;83225534	83223651;83224310;83224631;83226584	+;+;+;+	1408	6.30854	6.25773	4.98219	5.84948	24.7418	24.0848	15.0518	21.2928	1.86398	1.42422e-06	0.000328008	101	1
Nlrc5	chr8;chr8;chr8;chr8;chr8;chr8;chr8;chr8;chr8;chr8;chr8;chr8;chr8;chr8;chr8;chr8;chr8;chr8;chr8;chr8;chr8;chr8;chr8;chr8;chr8;chr8;chr8;chr8;chr8;chr8;chr8;chr8;chr8;chr8;chr8;chr8;chr8;chr8;chr8;chr8;chr8;chr8;chr8;chr8;chr8;chr8;chr8;chr8;chr8	94472763;94473985;94474632;94475695;94479468;94479691;94481780;94481976;94482567;94484070;94484538;94486632;94487652;94488583;94489513;94490330;94490825;94491481;94492331;94493041;94494270;94497782;94500379;94500618;94502219;94504381;94505106;94505462;94506496;94506667;94510444;94511215;94512252;94512554;94515601;94516223;94519195;94520823;94521016;94521210;94521403;94521720;94521917;94522669;945…	94473054;94474044;94474700;94477357;94479551;94479774;94481863;94482065;94482626;94484132;94484621;94486715;94487741;94488651;94489581;94490422;94490908;94491570;94492375;94493118;94494353;94497865;94500468;94500680;94502302;94504464;94505195;94505527;94506579;94506750;94510530;94511295;94512335;94512646;94515684;94516306;94519278;94520906;94521099;94521293;94521486;94521803;94521994;94522752;945…	+;+;+;+;+;+;+;+;+;+;+;+;+;+;+;+;+;+;+;+;+;+;+;+;+;+;+;+;+;+;+;+;+;+;+;+;+;+;+;+;+;+;+;+;+;+;+;+;+	6945	9.4628	5.21477	4.98219	6.55325	20.7831	20.3794	24.0828	21.7484	1.73063	2.10529e-06	0.000440232	112	1
A330021E22Rik	chr5;chr5;chr5;chr5;chr5;chr5;chr5;chr5;chr5;chr5;chr5;chr5;chr5;chr5;chr5;chr5;chr5;chr5;chr5;chr5;chr5;chr5;chr5	5580982;5581904;5582442;5584651;5586356;5587141;5589120;5593772;5595921;5604274;5613686;5617169;5618948;5619167;5621920;5625750;5626009;5640129;5644424;5646936;5649790;5657788;5663908	5581366;5582008;5582528;5584848;5586432;5587278;5589312;5593853;5596039;5604392;5613850;5617385;5619069;5619215;5622043;5625927;5626158;5640227;5644500;5647045;5649855;5657847;5664232	-;-;-;-;-;-;-;-;-;-;-;-;-;-;-;-;-;-;-;-;-;-;-	3245	16.8228	12.5155	23.9145	17.7509	40.5765	39.8325	39.1346	39.8479	1.16661	2.88099e-06	0.000566998	119	1
Sfrp1	chr8;chr8;chr8	23411502;23417330;23446166	23412328;23417407;23449632	+;+;+	4372	57.8282	44.847	107.615	70.0968	133.605	146.361	155.535	145.167	1.05029	3.62153e-06	0.000695215	122	1
Ptx3	chr3;chr3;chr3	66219887;66220650;66224592	66220191;66221051;66225806	+;+;+	1922	579.334	323.316	821.065	574.571	1456.79	1253.33	986.393	1232.17	1.10065	4.60442e-06	0.000835934	129	1
U90926	chr5;chr5;chr5;chr5;chr5	92209895;92211098;92212021;92212785;92215294	92210147;92211133;92212074;92212848;92215408	-;-;-;-;-	522	28.3884	32.3316	182.348	81.0227	330.55	478.916	327.125	378.864	2.22528	5.61137e-06	0.000988107	133	1
Fam110c	chr12;chr12	31073968;31078626	31075322;31079940	+;+	2670	2.10285	2.08591	3.98575	2.72483	15.8347	13.8951	10.0345	13.2548	2.28227	6.01992e-06	0.00104434	135	1
Slco4a1	chr2;chr2;chr2;chr2;chr2;chr2;chr2;chr2;chr2;chr2;chr2;chr2	180460978;180463941;180465597;180467058;180467567;180471104;180472054;180472405;180472661;180473103;180473514;180474104	180461198;180464828;180465687;180467179;180467678;180471258;180472249;180472570;180472833;180473167;180473662;180474853	+;+;+;+;+;+;+;+;+;+;+;+	3088	42.0569	42.7611	91.6723	58.8301	126.678	130.614	108.373	121.888	1.05093	7.46973e-06	0.00125857	139	1
Mndal	chr1;chr1;chr1;chr1;chr1;chr1;chr1;chr1;chr1;chr1	173857220;173860176;173862461;173865399;173871378;173872852;173874351;173875576;173879925;173880151	173857510;173860364;173862883;173865557;173871545;173873019;173874472;173875860;173879990;173880187	-;-;-;-;-;-;-;-;-;-	1908	6.30854	4.17182	0.996438	3.8256	17.8141	17.6004	12.0414	15.8186	2.04787	8.28891e-06	0.00137678	141	1
Nlrp3	chr11;chr11;chr11;chr11;chr11;chr11;chr11;chr11;chr11;chr11	59542686;59543069;59546774;59547990;59551771;59555748;59558383;59565040;59565845;59566164	59542867;59543389;59546887;59549745;59551941;59555918;59558553;59565210;59566015;59566956	+;+;+;+;+;+;+;+;+;+	4021	14.7199	12.5155	31.886	19.7071	65.3182	59.2856	35.1208	53.2415	1.43384	8.57941e-06	0.00140901	142	1
Atp8b4	chr2;chr2;chr2;chr2;chr2;chr2;chr2;chr2;chr2;chr2;chr2;chr2;chr2;chr2;chr2;chr2;chr2;chr2;chr2;chr2;chr2;chr2;chr2;chr2;chr2;chr2;chr2;chr2	126320973;126325275;126330862;126337377;126342955;126358016;126358768;126361756;126372165;126374484;126375666;126378713;126383661;126389241;126392802;126397588;126403191;126405308;126414287;126424148;126427357;126433873;126458243;126459636;126462608;126480628;126489380;126491481	126323091;126325405;126331000;126337622;126343038;126358239;126358951;126361903;126372270;126374595;126375830;126378828;126383849;126389406;126392848;126397796;126403387;126405396;126414445;126424230;126427427;126433945;126458304;126459734;126462721;126480686;126489444;126491553	-;-;-;-;-;-;-;-;-;-;-;-;-;-;-;-;-;-;-;-;-;-;-;-;-;-;-;-	5529	9.4628	8.34364	14.9466	10.9177	23.7521	27.7901	31.107	27.5497	1.33537	1.26385e-05	0.00194733	152	1
Slc47a1	chr11;chr11;chr11;chr11;chr11;chr11;chr11;chr11;chr11;chr11;chr11;chr11;chr11;chr11;chr11;chr11;chr11	61343400;61348659;61349445;61352662;61353066;61359352;61359520;61362687;61362827;61363023;61363394;61367673;61369251;61370118;61371756;61373355;61377913	61344528;61348731;61349539;61352794;61353135;61359427;61359628;61362754;61362940;61363120;61363491;61367717;61369293;61370266;61371824;61373456;61378075	-;-;-;-;-;-;-;-;-;-;-;-;-;-;-;-;-	2634	1.05142	1.04295	1.99288	1.36242	9.8967	12.0424	7.02416	9.65442	2.82502	1.63321e-05	0.00246181	155	1
Il18rap	chr1;chr1;chr1;chr1;chr1;chr1;chr1;chr1;chr1;chr1;chr1;chr1;chr1	40515362;40515700;40516397;40524216;40524794;40525204;40531476;40537058;40539224;40541887;40542990;40547767;40548625	40515476;40515775;40516535;40524382;40525115;40525387;40531626;40537123;40539347;40542038;40543127;40547940;40549297	+;+;+;+;+;+;+;+;+;+;+;+;+	2481	9.4628	10.4295	15.943	11.9451	23.7521	31.4955	30.1036	28.4504	1.25203	2.31957e-05	0.00325296	167	1
Gpr97	chr8;chr8;chr8;chr8;chr8;chr8;chr8;chr8;chr8;chr8;chr8;chr8	95017692;95020933;95033358;95034950;95035810;95036441;95036600;95036826;95039409;95039850;95040260;95044405	95017820;95021083;95033493;95035096;95035944;95036480;95036691;95036938;95039689;95039943;95040534;95045249	+;+;+;+;+;+;+;+;+;+;+;+	2438	10.5142	10.4295	16.9394	12.6277	33.6488	32.4218	23.0794	29.7167	1.23468	2.76128e-05	0.00371661	174	1
C2	chr17;chr17;chr17;chr17;chr17;chr17;chr17;chr17;chr17;chr17;chr17;chr17;chr17;chr17;chr17;chr17;chr17;chr17	34862602;34863179;34863345;34863624;34863863;34864045;34864308;34864512;34864729;34866518;34872367;34873462;34875888;34876154;34876334;34879882;34881572;34881950	34863031;34863228;34863474;34863715;34863939;34864210;34864425;34864606;34864869;34866607;34872507;34873600;34876021;34876255;34876510;34880067;34881796;34882100	-;-;-;-;-;-;-;-;-;-;-;-;-;-;-;-;-;-	2644	46.2626	21.902	31.886	33.3502	66.3079	55.5802	111.383	77.7571	1.22128	3.01194e-05	0.00398529	177	1
S100b	chr10;chr10;chr10	76253836;76257027;76259928	76253958;76257172;76261319	+;+;+	1661	15.7713	8.34364	17.9359	14.017	39.5868	22.2321	49.1691	36.996	1.4002	4.09797e-05	0.00497277	193	1
Calr3	chr8;chr8;chr8;chr8;chr8;chr8;chr8;chr8;chr8;chr8	72424183;72425767;72427162;72428070;72431373;72434790;72434964;72438432;72443395;72443593	72424755;72425859;72427293;72428165;72431561;72434884;72435156;72438635;72443496;72443778	-;-;-;-;-;-;-;-;-;-	1863	4.20569	7.30068	9.96438	7.15692	19.7934	18.5267	21.0725	19.7975	1.46791	5.33951e-05	0.00595483	210	1
Psmb8	chr17;chr17;chr17;chr17;chr17;chr17	34198195;34199233;34199571;34200141;34200711;34201178	34198545;34199380;34199682;34200270;34200915;34201454	+;+;+;+;+;+	1223	16.8228	13.5584	11.9573	14.1128	30.6798	37.0535	26.0897	31.2743	1.14797	5.47193e-05	0.00604493	212	1
3830403N18Rik	chrX;chrX;chrX;chrX;chrX;chrX;chrX;chrX	56136572;56137971;56138411;56138745;56147076;56147888;56152655;56153073	56136625;56138096;56138474;56138779;56147193;56147987;56152753;56153496	+;+;+;+;+;+;+;+	1020	1.05142	2.08591	0	1.04578	7.91736	10.1897	6.02071	8.04259	2.94309	6.77882e-05	0.0070875	224	1
F5	chr1;chr1;chr1;chr1;chr1;chr1;chr1;chr1;chr1;chr1;chr1;chr1;chr1;chr1;chr1;chr1;chr1;chr1;chr1;chr1;chr1;chr1;chr1;chr1;chr1	164151859;164154326;164161778;164174100;164176221;164179356;164181612;164182817;164184508;164184912;164186767;164190112;164191927;164195551;164198712;164201522;164204782;164207010;164207852;164208937;164209463;164211748;164214375;164217367;164219378	164152120;164154414;164161900;164174312;164176364;164179577;164181777;164182994;164184607;164185123;164186917;164190324;164194633;164195725;164198948;164201729;164204961;164207126;164207923;164209040;164209618;164211892;164214526;164217549;164220274	+;+;+;+;+;+;+;+;+;+;+;+;+;+;+;+;+;+;+;+;+;+;+;+;+	7406	6.30854	4.17182	18.9323	9.80422	26.7211	25.0111	28.0967	26.6096	1.44047	7.13518e-05	0.00735167	227	1
Cdkn2d	chr9;chr9	21288464;21290809	21289332;21291209	-;-	1270	19.977	17.7302	30.8896	22.8656	55.4215	50.9486	34.1174	46.8292	1.03423	7.86774e-05	0.00783654	235	1
Casp1	chr9;chr9;chr9;chr9;chr9;chr9;chr9;chr9;chr9;chr9	5298517;5299280;5299803;5302417;5302998;5303540;5304187;5306117;5306670;5307183	5298723;5299546;5299865;5302529;5303171;5303774;5304327;5306226;5306773;5307281	+;+;+;+;+;+;+;+;+;+	1513	6.30854	11.4725	8.96794	8.91632	27.7108	22.2321	18.0621	22.6683	1.34616	8.68046e-05	0.00850612	239	1
Bdkrb1	chr12	105604091	105605428	+	1338	22.0799	18.7732	46.8326	29.2285	50.4732	65.77	67.2313	61.1581	1.06517	9.81871e-05	0.009399	244	1
Fmn2	chr1;chr1;chr1;chr1;chr1;chr1;chr1;chr1;chr1;chr1;chr1;chr1;chr1;chr1;chr1;chr1;chr1;chr1	174501825;174537045;174581916;174593061;174608382;174612507;174647106;174666643;174694187;174694432;174695586;174698769;174699556;174719845;174744255;174791258;174819954;174821219	174503591;174537211;174582063;174593116;174609952;174612651;174647193;174666704;174694278;174694561;174695732;174698828;174699676;174719937;174744306;174791407;174820035;174822729	+;+;+;+;+;+;+;+;+;+;+;+;+;+;+;+;+;+	6442	10.5142	7.30068	5.97863	7.93118	28.7004	25.0111	13.0449	22.2521	1.48834	0.000104202	0.00984035	248	1
Tnfsf11	chr14;chr14;chr14;chr14;chr14	78277446;78284239;78284420;78299838;78307668	78278997;78284337;78284465;78299999;78308043	-;-;-;-;-	2235	15.7713	4.17182	17.9359	12.6263	33.6488	33.3481	24.0828	30.3599	1.26573	0.000121537	0.0111623	255	1
Asb5	chr8;chr8;chr8;chr8;chr8;chr8;chr8	54550331;54580826;54583551;54584659;54584979;54585771;54587234	54550640;54580905;54583658;54584809;54585113;54585962;54587836	+;+;+;+;+;+;+	1579	5.25711	4.17182	7.9715	5.80014	9.8967	27.7901	21.0725	19.5864	1.75569	0.00012202	0.011163	256	1
Gm12505	chr4;chr4;chr4;chr4	55410443;55411807;55413909;55418681	55410655;55411961;55414135;55418842	-;-;-;-	757	10.5142	12.5155	16.9394	13.323	28.7004	26.8638	29.1001	28.2214	1.08287	0.000130033	0.0116236	262	1
Actg2	chr6;chr6;chr6;chr6;chr6;chr6;chr6;chr6;chr6	83512909;83516268;83519768;83520656;83522816;83523168;83526806;83527316;83536180	83513128;83516449;83519959;83520817;83522900;83523278;83526934;83527477;83536251	-;-;-;-;-;-;-;-;-	1315	18.9256	36.5034	79.715	45.048	96.9877	110.234	111.383	106.202	1.23727	0.000130734	0.0116418	263	1
Kif26b	chr1;chr1;chr1;chr1;chr1;chr1;chr1;chr1;chr1;chr1;chr1;chr1;chr1;chr1;chr1	178529125;178530389;178678826;178715803;178821483;178864846;178869346;178870597;178873972;178883915;178913689;178914762;178928159;178928844;178932080	178529625;178530790;178679359;178715969;178821666;178865052;178869439;178870859;178874155;178884074;178913851;178918176;178928361;178928994;178932857	+;+;+;+;+;+;+;+;+;+;+;+;+;+;+	7406	25.2341	11.4725	23.9145	20.207	33.6488	39.8325	60.2071	44.5628	1.14098	0.000137812	0.0119983	269	1
Grb14	chr2;chr2;chr2;chr2;chr2;chr2;chr2;chr2;chr2;chr2;chr2;chr2;chr2;chr2	64912482;64914716;64916829;64917035;64917199;64923537;64929900;64930186;64933220;64936417;64938369;64953562;65021087;65022460	64912853;64914809;64916916;64917107;64917315;64923617;64929995;64930296;64933357;64936491;64938490;64953718;65021219;65022766	-;-;-;-;-;-;-;-;-;-;-;-;-;-	1964	5.25711	2.08591	4.98219	4.1084	12.8657	24.0848	9.03107	15.3272	1.89944	0.000140069	0.0121049	271	1
Clhc1	chr4;chr4;chr4	134510999;134521472;134522954	134511169;134521601;134523922	+;+;+	1270	18.9256	15.6443	17.9359	17.5019	43.5455	28.7165	34.1174	35.4598	1.01867	0.000143809	0.0123371	273	1
Steap4	chr5;chr5;chr5;chr5;chr5	7960472;7975439;7976495;7978408;7980295	7960541;7975896;7977022;7978572;7982213	+;+;+;+;+	3140	26.2856	7.30068	26.9038	20.1634	66.3079	40.7588	41.1415	49.4028	1.29286	0.000152343	0.0128495	277	1
C920025E04Rik	chr17;chr17;chr17;chr17;chr17;chr17;chr17	36109030;36109410;36109617;36109860;36110668;36111157;36111597	36109270;36109439;36109732;36110135;36110943;36111426;36111676	-;-;-;-;-;-;-	1289	2.10285	2.08591	0.996438	1.7284	5.93802	15.7477	7.02416	9.56997	2.46908	0.000161528	0.0134238	281	1
Fbn2	chr18;chr18;chr18;chr18;chr18;chr18;chr18;chr18;chr18;chr18;chr18;chr18;chr18;chr18;chr18;chr18;chr18;chr18;chr18;chr18;chr18;chr18;chr18;chr18;chr18;chr18;chr18;chr18;chr18;chr18;chr18;chr18;chr18;chr18;chr18;chr18;chr18;chr18;chr18;chr18;chr18;chr18;chr18;chr18;chr18;chr18;chr18;chr18;chr18;chr18;chr18;chr18;chr18;chr18;chr18;chr18;chr18;chr18;chr18;chr18;chr18;chr18;chr18;chr18;chr18	58008623;58012214;58013652;58018737;58020370;58021074;58023173;58025026;58026332;58027817;58035273;58035847;58036962;58037702;58038200;58039308;58040074;58043493;58044199;58045269;58047925;58048535;58048801;58050211;58052943;58053649;58054826;58055414;58056195;58058354;58059335;58061638;58063507;58065994;58068266;58069128;58069407;58069948;58071793;58072554;58075980;58076612;58080146;58080724;580…	58010632;58012391;58013883;58018856;58020498;58021190;58023295;58025151;58026538;58027942;58035404;58035969;58037081;58037827;58038265;58039460;58040199;58043612;58044327;58045385;58048050;58048660;58048926;58050279;58053095;58053774;58054951;58055482;58056356;58058476;58059457;58061763;58063629;58066116;58068391;58069253;58069529;58070073;58071918;58072682;58076105;58076839;58080271;58080774;580…	-;-;-;-;-;-;-;-;-;-;-;-;-;-;-;-;-;-;-;-;-;-;-;-;-;-;-;-;-;-;-;-;-;-;-;-;-;-;-;-;-;-;-;-;-;-;-;-;-;-;-;-;-;-;-;-;-;-;-;-;-;-;-;-;-	10480	8.41138	11.4725	18.9323	12.9387	27.7108	27.7901	27.0932	27.5314	1.08938	0.000225266	0.0176446	299	1
Bdnf	chr2;chr2;chr2;chr2;chr2	109674700;109675897;109692436;109693563;109723382	109675339;109676395;109692774;109693909;109727043	+;+;+;+;+	5487	10.5142	7.30068	11.9573	9.92405	23.7521	20.3794	24.0828	22.7381	1.19611	0.000245603	0.0189211	304	1
Id4	chr13;chr13;chr13	48261427;48262285;48262952	48261938;48262347;48264036	+;+;+	1660	10.5142	9.38659	9.96438	9.95506	25.7314	25.9374	17.0587	22.9092	1.20242	0.000248494	0.0190187	306	1
Zfp575	chr7;chr7;chr7;chr7	24583838;24586654;24587158;24587451	24586138;24586817;24587242;24587641	-;-;-;-	2741	2.10285	2.08591	0.996438	1.7284	13.8554	12.0424	3.01036	9.63604	2.47901	0.00025857	0.0195977	309	1
Rps6ka5	chr12;chr12;chr12;chr12;chr12;chr12;chr12;chr12;chr12;chr12;chr12;chr12;chr12;chr12;chr12;chr12;chr12;chr12	100549778;100553001;100554274;100558449;100570829;100573798;100574431;100575123;100575635;100577722;100581296;100595815;100597890;100615997;100619526;100654271;100678518;100724781	100551683;100553164;100554433;100558640;100570999;100573992;100574524;100575256;100575760;100577883;100581446;100595918;100597973;100616104;100619641;100654489;100678589;100725028	-;-;-;-;-;-;-;-;-;-;-;-;-;-;-;-;-;-	4406	10.5142	5.21477	6.97506	7.56802	18.8037	24.0848	15.0518	19.3134	1.35162	0.000296853	0.0218626	318	1
Ccl5	chr11;chr11;chr11	83525779;83529156;83530386	83526064;83529267;83530518	-;-;-	531	7.35996	5.21477	10.9608	7.84518	16.8244	29.6428	16.0552	20.8408	1.40953	0.000303232	0.0222623	319	1
Zfp697	chr3;chr3;chr3	98382481;98425223;98427162	98382578;98425500;98431949	+;+;+	5164	16.8228	15.6443	7.9715	13.4795	23.7521	34.2745	26.0897	28.0388	1.05665	0.000614976	0.0380616	378	1
Grem1	chr2;chr2	113748675;113758491	113750155;113758648	-;-	1639	15.7713	21.902	56.7969	31.4901	80.1633	77.8123	55.1899	71.0552	1.17404	0.000648055	0.0395246	384	1
Fgf10	chr13;chr13;chr13	118714699;118781506;118789119	118715711;118781609;118792573	+;+;+	4572	19.977	10.4295	19.9288	16.7784	26.7211	30.5691	52.1795	36.4899	1.12089	0.000672674	0.0404988	389	1
Clec11a	chr7;chr7;chr7;chr7	44303766;44305829;44306273;44306619	44304986;44306020;44306474;44306959	-;-;-;-	1956	16.8228	8.34364	11.9573	12.3745	17.8141	33.3481	28.0967	26.4196	1.09423	0.000748466	0.0439325	399	1
Ccl20	chr1;chr1;chr1;chr1	83116766;83117796;83117999;83118696	83116902;83117910;83118076;83119167	+;+;+;+	802	3.15427	0	2.98931	2.04786	8.90703	11.116	6.02071	8.68126	2.08379	0.000768962	0.0449105	401	1
Ly75	chr2;chr2;chr2;chr2;chr2;chr2;chr2;chr2;chr2;chr2;chr2;chr2;chr2;chr2;chr2;chr2;chr2;chr2;chr2;chr2;chr2;chr2;chr2;chr2;chr2;chr2;chr2;chr2;chr2;chr2;chr2;chr2;chr2;chr2;chr2	60293760;60299047;60300955;60303578;60306330;60308139;60311609;60314157;60316089;60318308;60321698;60323819;60327787;60328390;60329976;60330726;60331077;60332319;60332925;60334450;60338295;60340153;60348353;60349858;60352056;60352354;60352922;60354405;60355369;60357277;60358468;60365011;60368759;60375858;60383138	60293938;60299214;60301077;60303727;60306498;60308365;60311803;60314273;60316256;60318473;60321924;60323948;60327947;60328495;60330115;60330808;60331144;60332494;60332960;60334564;60338363;60340234;60348495;60350057;60352225;60352442;60353032;60354562;60355560;60357417;60358578;60365175;60368929;60376229;60383231	-;-;-;-;-;-;-;-;-;-;-;-;-;-;-;-;-;-;-;-;-;-;-;-;-;-;-;-;-;-;-;-;-;-;-	5172	10.5142	6.25773	24.9109	13.8943	24.7418	51.8749	31.107	35.9079	1.36981	0.000814045	0.0468426	407	1
Ska1	chr18;chr18;chr18;chr18;chr18;chr18;chr18	74195299;74197514;74199900;74202590;74204264;74206789;74207530	74197051;74197683;74200037;74202687;74204388;74206884;74207818	-;-;-;-;-;-;-	2669	9.4628	11.4725	5.97863	8.97131	14.8451	24.0848	22.0759	20.3353	1.18059	0.00085421	0.0485573	412	1
Tph1	chr7;chr7;chr7;chr7;chr7;chr7;chr7;chr7;chr7;chr7;chr7;chr7	46644641;46649947;46650891;46652858;46653741;46656860;46657208;46660337;46662007;46665176;46667263;46672112	46647600;46650080;46650986;46652984;46653876;46657056;46657275;46660516;46662190;46665308;46667377;46672537	-;-;-;-;-;-;-;-;-;-;-;-	4756	2.10285	0	0.996438	1.03309	6.92769	6.48436	5.01726	6.1431	2.572	0.000976882	0.0542146	422	0
Acacb	chr5;chr5;chr5;chr5;chr5;chr5;chr5;chr5;chr5;chr5;chr5;chr5;chr5;chr5;chr5;chr5;chr5;chr5;chr5;chr5;chr5;chr5;chr5;chr5;chr5;chr5;chr5;chr5;chr5;chr5;chr5;chr5;chr5;chr5;chr5;chr5;chr5;chr5;chr5;chr5;chr5;chr5;chr5;chr5;chr5;chr5;chr5;chr5;chr5;chr5;chr5;chr5	114165518;114184050;114188331;114190076;114190330;114191155;114191852;114192074;114195224;114195635;114196660;114198177;114200240;114200496;114201899;114203390;114204672;114207236;114209753;114210905;114212651;114213312;114213613;114216601;114216811;114217649;114218862;114223232;114223808;114223989;114225574;114225854;114226677;114228531;114229731;114230715;114232847;114233083;114235453;114236507…	114166140;114184182;114188469;114190185;114190411;114191253;114191961;114192184;114195433;114195805;114196821;114198340;114200390;114200599;114201980;114203535;114204822;114207370;114209899;114211093;114212751;114213400;114213737;114216714;114216924;114217738;114218980;114223369;114223907;114224096;114225630;114225895;114226892;114228686;114229934;114230870;114232969;114233352;114235550;114236627…	+;+;+;+;+;+;+;+;+;+;+;+;+;+;+;+;+;+;+;+;+;+;+;+;+;+;+;+;+;+;+;+;+;+;+;+;+;+;+;+;+;+;+;+;+;+;+;+;+;+;+;+	8485	11.5656	5.21477	10.9608	9.24708	37.6075	20.3794	14.0483	24.0117	1.37667	0.00112564	0.0601885	438	0
Cd244	chr1;chr1;chr1;chr1;chr1;chr1;chr1;chr1;chr1	171559193;171573681;171574093;171577243;171577815;171579099;171580758;171581643;171582804	171559385;171574004;171574368;171577347;171577969;171579170;171580820;171581699;171585316	+;+;+;+;+;+;+;+;+	3758	2.10285	0	3.98575	2.02953	6.92769	7.4107	11.038	8.45879	2.0593	0.00120772	0.0635615	445	0
Siglecg	chr7;chr7;chr7;chr7;chr7;chr7;chr7;chr7;chr7;chr7;chr7;chr7	43408280;43408506;43408731;43409243;43410509;43410943;43411414;43411562;43411890;43412432;43412615;43417811	43408370;43408599;43409108;43409521;43410556;43411206;43411461;43411819;43412174;43412519;43412726;43418349	+;+;+;+;+;+;+;+;+;+;+;+	2484	2.10285	3.12886	2.98931	2.74034	10.8864	12.9687	5.01726	9.62412	1.8123	0.00131899	0.0683422	452	0
Nkd1	chr8;chr8;chr8;chr8;chr8;chr8;chr8;chr8;chr8;chr8;chr8	88521344;88521647;88522287;88527633;88574198;88583203;88585154;88589154;88589728;88590723;88591560	88521531;88521679;88522420;88527777;88574264;88583309;88585249;88589301;88589812;88590850;88594887	+;+;+;+;+;+;+;+;+;+;+	4459	11.5656	7.30068	8.96794	9.27809	17.8141	24.0848	18.0621	19.987	1.10716	0.00136135	0.0700721	455	0
Tnfrsf9	chr4;chr4;chr4;chr4;chr4;chr4;chr4;chr4;chr4	150920155;150927999;150929821;150930729;150932308;150933033;150934287;150935422;150944773	150920260;150928085;150929945;150930833;150932445;150933102;150934411;150935556;150946102	+;+;+;+;+;+;+;+;+	2221	1.05142	0	4.98219	2.0112	14.8451	6.48436	6.02071	9.11671	2.18045	0.00137515	0.0704728	457	0
Ang	chr14;chr14;chr14	51091077;51096000;51101386	51091253;51096473;51102009	+;+;+	1275	10.5142	11.4725	7.9715	9.98608	20.7831	21.3058	20.069	20.7193	1.05298	0.00143357	0.0718932	467	0
Il33	chr19;chr19;chr19;chr19;chr19;chr19;chr19;chr19;chr19	29925114;29945790;29949660;29951976;29952730;29954543;29955201;29956901;29958850	29925161;29945858;29949767;29952101;29952840;29954668;29955251;29956998;29960715	+;+;+;+;+;+;+;+;+	2603	17.8742	10.4295	30.8896	19.7311	29.6901	50.9486	39.1346	39.9244	1.0168	0.00148378	0.0739363	470	0
Kcnk10	chr12;chr12;chr12;chr12;chr12;chr12;chr12	98433994;98436192;98440592;98489905;98496193;98518498;98577786	98435427;98436334;98440778;98490065;98496310;98518832;98577940	-;-;-;-;-;-;-	2533	2.10285	4.17182	4.98219	3.75228	11.876	12.0424	9.03107	10.9832	1.54945	0.00156324	0.076652	477	0
Hscb	chr5;chr5;chr5;chr5;chr5;chr5	110829070;110830936;110834655;110835980;110836307;110839496	110829211;110830983;110834799;110836069;110836403;110839777	-;-;-;-;-;-	804	4.20569	6.25773	4.98219	5.14853	15.8347	12.9687	12.0414	13.615	1.40296	0.00157462	0.0768284	480	0
Acp5	chr9;chr9;chr9;chr9;chr9;chr9;chr9	22126727;22127675;22129531;22129863;22130523;22131737;22135613	22127262;22128020;22129658;22130129;22130598;22131865;22135746	-;-;-;-;-;-;-	1616	27.337	25.0309	59.7863	37.3847	57.4009	116.719	59.2037	77.7744	1.05685	0.00172562	0.0830079	486	0
Gm4262	chr16;chr16;chr16	11008898;11011953;11013406	11009058;11011996;11015184	+;+;+	1984	4.20569	3.12886	3.98575	3.77343	9.8967	16.6741	7.02416	11.1983	1.56933	0.00172608	0.0830079	487	0
Pif1	chr9;chr9;chr9;chr9;chr9;chr9;chr9;chr9;chr9;chr9;chr9;chr9	65587205;65589005;65589215;65589451;65589713;65589948;65591720;65592124;65593262;65593457;65594387;65594781	65588394;65589137;65589340;65589604;65589827;65590054;65591859;65592230;65593349;65593602;65594578;65595962	+;+;+;+;+;+;+;+;+;+;+;+	3680	6.30854	3.12886	12.9537	7.4637	26.7211	17.6004	13.0449	19.1221	1.35728	0.0019188	0.0904189	497	0
Car6	chr4;chr4;chr4;chr4;chr4;chr4;chr4;chr4	150187016;150189121;150192475;150193708;150196056;150197318;150198099;150201037	150187508;150189244;150192632;150193777;150196148;150197466;150198281;150201135	-;-;-;-;-;-;-;-	1369	0	5.21477	6.97506	4.06328	12.8657	7.4107	17.0587	12.445	1.61485	0.00198242	0.0923785	502	0
Prr16	chr18;chr18	51117898;51302610	51118089;51304641	+;+	2224	1.05142	2.08591	5.97863	3.03865	6.92769	13.8951	9.03107	9.95127	1.71145	0.00198405	0.0923785	503	0
Wnt2b	chr3;chr3;chr3;chr3;chr3	104944805;104951012;104952915;104954624;104961297	104947200;104951276;104953192;104954844;104961709	-;-;-;-;-	3573	5.25711	5.21477	7.9715	6.1478	15.8347	19.4531	10.0345	15.1074	1.29712	0.00203791	0.0945104	505	0
Serpind1	chr16;chr16;chr16;chr16;chr16	17331371;17336165;17339768;17342341;17342853	17331447;17337136;17340041;17342485;17343572	+;+;+;+;+	2188	0	2.08591	0.996438	1.02745	2.96901	5.55802	8.02762	5.51822	2.42514	0.00334282	0.133144	588	0
Psg23	chr7;chr7;chr7;chr7;chr7	18606343;18610397;18611988;18614460;18616244	18607195;18610747;18612347;18614816;18616501	-;-;-;-;-	2179	3.15427	3.12886	1.99288	2.75867	5.93802	9.26337	11.038	8.74646	1.66473	0.00362054	0.141271	600	0
Arg2	chr12;chr12;chr12;chr12;chr12;chr12;chr12;chr12	79130788;79131841;79147588;79149869;79150732;79150953;79151922;79155826	79130980;79131913;79147765;79150028;79150826;79151057;79152058;79156301	+;+;+;+;+;+;+;+	1417	6.30854	4.17182	7.9715	6.15062	11.876	19.4531	12.0414	14.4569	1.23295	0.003726	0.143334	608	0
Hunk	chr16;chr16;chr16;chr16;chr16;chr16;chr16;chr16;chr16;chr16;chr16	90386397;90432514;90447310;90453680;90464141;90472444;90475820;90481250;90487859;90493413;90496090	90386716;90432806;90447365;90453815;90464268;90472579;90475982;90481333;90487906;90493593;90499553	+;+;+;+;+;+;+;+;+;+;+	5009	6.30854	4.17182	1.99288	4.15774	11.876	12.9687	9.03107	11.2919	1.44142	0.00401576	0.15072	624	0
Nrk	chrX;chrX;chrX;chrX;chrX;chrX;chrX;chrX;chrX;chrX;chrX;chrX;chrX;chrX;chrX;chrX;chrX;chrX;chrX;chrX;chrX;chrX;chrX;chrX;chrX;chrX;chrX;chrX	138914430;138921039;138958350;138959617;138963283;138964904;138966386;138967668;138970334;138971788;138972803;138974644;138975137;138978660;138981070;138982639;138983842;138985180;138986678;138988695;138990018;138991991;138994156;138995881;138997820;139000782;139003960;139007083	138914808;138921104;138958406;138959688;138963408;138965014;138966476;138967798;138970388;138971866;138972978;138974707;138976265;138978758;138981137;138982754;138983939;138985535;138986939;138988851;138990089;138992134;138994314;138995981;138997969;139000917;139004099;139009090	+;+;+;+;+;+;+;+;+;+;+;+;+;+;+;+;+;+;+;+;+;+;+;+;+;+;+;+	6602	2.10285	1.04295	1.99288	1.71289	4.94835	6.48436	8.02762	6.48678	1.92107	0.00460484	0.168047	641	0
H2-T10	chr17;chr17;chr17;chr17;chr17;chr17;chr17;chr17;chr17;chr17	36115871;36117665;36117857;36118022;36118936;36119189;36120185;36120615;36121065;36121293	36117456;36117734;36117903;36118054;36119040;36119464;36120432;36120875;36121183;36121444	-;-;-;-;-;-;-;-;-;-	2897	2.10285	4.17182	6.97506	4.41658	5.93802	13.8951	15.0518	11.6283	1.39664	0.00481327	0.173693	649	0
Irx1	chr13;chr13;chr13;chr13	71958232;71958901;71959250;71963213	71958673;71958973;71960285;71963723	-;-;-;-	2062	6.30854	3.12886	5.97863	5.13867	17.8141	12.9687	8.02762	12.9368	1.33201	0.00493075	0.176572	654	0
Trpm3	chr19;chr19;chr19;chr19;chr19;chr19;chr19;chr19;chr19;chr19;chr19;chr19;chr19;chr19;chr19;chr19;chr19;chr19;chr19;chr19;chr19;chr19;chr19;chr19;chr19;chr19;chr19;chr19;chr19;chr19	22139117;22448208;22692619;22697422;22698729;22711712;22715229;22733000;22749771;22766634;22771958;22793331;22856678;22883884;22885348;22889394;22897484;22897670;22900134;22901046;22901988;22904635;22910035;22914431;22918603;22925896;22978292;22978556;22982583;22986856	22139301;22448459;22692851;22697501;22698933;22711925;22715353;22733171;22749845;22769380;22772381;22793454;22856750;22883984;22885482;22889444;22897519;22897810;22900163;22901335;22902216;22904802;22910175;22914559;22918854;22926489;22978442;22978755;22982715;22989884	+;+;+;+;+;+;+;+;+;+;+;+;+;+;+;+;+;+;+;+;+;+;+;+;+;+;+;+;+;+	10719	1.05142	1.04295	1.99288	1.36242	3.95868	5.55802	8.02762	5.84811	2.1018	0.00501772	0.178323	659	0
Mnd1	chr3;chr3;chr3;chr3;chr3;chr3;chr3;chr3	84087934;84093555;84104935;84116427;84134018;84138169;84141699;84155662	84088174;84093599;84105049;84116501;84134166;84138226;84141764;84155786	-;-;-;-;-;-;-;-	874	4.20569	5.21477	7.9715	5.79732	19.7934	12.0424	10.0345	13.9568	1.26751	0.00520763	0.182853	667	0
Stra6	chr9;chr9;chr9;chr9;chr9;chr9;chr9;chr9;chr9;chr9;chr9;chr9;chr9;chr9;chr9;chr9;chr9;chr9;chr9;chr9;chr9;chr9	58129088;58129349;58134075;58134665;58135074;58138980;58139356;58140414;58140859;58141056;58142915;58145461;58145713;58145998;58147462;58149180;58150078;58151161;58151363;58151879;58152445;58153153	58129150;58129681;58134448;58134832;58135202;58139046;58139441;58140553;58140882;58141222;58143037;58145528;58145792;58146059;58147624;58149255;58150211;58151278;58151464;58152042;58152600;58153997	+;+;+;+;+;+;+;+;+;+;+;+;+;+;+;+;+;+;+;+;+;+	3642	2.10285	1.04295	2.98931	2.04504	10.8864	10.1897	2.0069	7.69433	1.91167	0.00584967	0.199049	688	0
Tpd52l1	chr10;chr10;chr10;chr10;chr10;chr10;chr10	31332380;31338185;31341140;31346611;31357872;31379215;31445712	31332969;31338245;31341178;31346712;31358020;31379330;31445921	-;-;-;-;-;-;-	1267	4.20569	3.12886	2.98931	3.44129	11.876	12.9687	4.01381	9.61952	1.48302	0.0063259	0.209848	706	0
Angptl6	chr9;chr9;chr9;chr9;chr9;chr9	20873809;20875166;20875514;20876392;20878049;20879603	20874072;20875436;20875701;20876569;20878603;20879710	-;-;-;-;-;-	1564	0	4.17182	1.99288	2.0549	5.93802	6.48436	8.02762	6.81667	1.73	0.00697921	0.222688	734	0
Pla2g5	chr4;chr4;chr4;chr4;chr4;chr4	138799247;138801352;138804507;138806185;138819000;138863170	138800661;138801458;138804651;138806234;138819257;138863469	-;-;-;-;-;-	2275	3.15427	0	0.996438	1.38357	5.93802	4.63169	6.02071	5.53014	1.99892	0.00803139	0.243647	772	0
Rpl39l	chr16;chr16;chr16	10170228;10170415;10174281	10170324;10170491;10174911	+;+;+	805	4.20569	2.08591	9.96438	5.41866	14.8451	14.8214	8.02762	12.5647	1.21337	0.00832193	0.250192	779	0
Prss46	chr9;chr9;chr9;chr9;chr9	110844506;110849627;110849996;110851315;110856000	110844634;110849804;110850258;110851478;110856522	+;+;+;+;+	1257	4.20569	2.08591	3.98575	3.42578	8.90703	10.1897	8.02762	9.04145	1.40012	0.00853136	0.254093	786	0
Zfp618	chr4;chr4;chr4;chr4;chr4;chr4;chr4;chr4;chr4;chr4;chr4;chr4;chr4;chr4;chr4	62965574;63061521;63079840;63089366;63090005;63094432;63095348;63095477;63096891;63099280;63103514;63118549;63121331;63131108;63132329	62965706;63061564;63080096;63089443;63090043;63094521;63095383;63095554;63096934;63099295;63103603;63118629;63121408;63131209;63134030	+;+;+;+;+;+;+;+;+;+;+;+;+;+;+	2868	8.41138	4.17182	8.96794	7.18371	12.8657	16.6741	15.0518	14.8639	1.04901	0.00853848	0.254093	787	0
Hyls1	chr9;chr9;chr9;chr9	35560821;35564063;35568455;35569877	35562104;35564177;35568505;35570069	-;-;-;-	1643	11.5656	4.17182	12.9537	9.56372	25.7314	19.4531	13.0449	19.4098	1.02114	0.00891891	0.263048	794	0
Abhd15	chr11;chr11	77515117;77518316	77516052;77520628	+;+	3249	2.10285	3.12886	1.99288	2.40819	6.92769	6.48436	9.03107	7.48104	1.63529	0.0090546	0.265405	799	0
Akr1c13	chr13;chr13;chr13;chr13;chr13;chr13;chr13;chr13;chr13	4191187;4194034;4194677;4196433;4196989;4197801;4198478;4203367;4205341	4191310;4194201;4194793;4196510;4197111;4197910;4198643;4203449;4205603	+;+;+;+;+;+;+;+;+	1232	4.20569	6.25773	4.98219	5.14853	12.8657	9.26337	14.0483	12.0591	1.22789	0.00941929	0.273789	805	0
AA467197	chr2;chr2;chr2;chr2;chr2	122637887;122638072;122638257;122639216;122640701	122637941;122638133;122638342;122639276;122641076	+;+;+;+;+	640	0	1.04295	3.98575	1.67623	7.91736	1.85267	10.0345	6.60152	1.97757	0.0106746	0.29967	834	0
Tpsb2	chr17;chr17;chr17;chr17;chr17;chr17	25366333;25366552;25366760;25367046;25367445;25367682	25366343;25366621;25366925;25367311;25367608;25368092	+;+;+;+;+;+	1088	3.15427	1.04295	1.99288	2.06337	8.90703	5.55802	5.01726	6.49411	1.65413	0.0108192	0.301777	839	0
Psma8	chr18;chr18;chr18;chr18;chr18;chr18;chr18	14706151;14721167;14726504;14730979;14757282;14757622;14761347	14706332;14721293;14726628;14731101;14757401;14757684;14762299	+;+;+;+;+;+;+	1693	1.05142	2.08591	0	1.04578	6.92769	6.48436	1.00345	4.80517	2.20001	0.0115307	0.315479	856	0
Pnp2	chr14;chr14;chr14;chr14;chr14;chr14	50956141;50959515;50963105;50963390;50963679;50964256	50956228;50959684;50963208;50963565;50963869;50964749	+;+;+;+;+;+	1223	1.05142	1.04295	2.98931	1.69456	3.95868	6.48436	7.02416	5.8224	1.7807	0.0118791	0.322374	863	0
Afp	chr5;chr5;chr5;chr5;chr5;chr5;chr5;chr5;chr5;chr5;chr5;chr5;chr5;chr5;chr5	90490714;90491698;90492650;90495964;90497197;90498265;90499600;90501407;90503574;90504331;90504950;90506521;90507798;90508430;90508717	90490865;90491749;90492770;90496175;90497329;90498362;90499729;90501621;90503706;90504428;90505088;90506744;90507930;90508484;90508907	+;+;+;+;+;+;+;+;+;+;+;+;+;+;+	2086	0	2.08591	2.98931	1.69174	4.94835	8.33704	5.01726	6.10088	1.85051	0.0123231	0.330591	873	0
Krt5	chr15;chr15;chr15;chr15;chr15;chr15;chr15;chr15;chr15	101707070;101708117;101708876;101709753;101710251;101710536;101710739;101711529;101712274	101707722;101708151;101709096;101709878;101710415;101710631;101710799;101711743;101712891	-;-;-;-;-;-;-;-;-	2190	2.10285	0	1.99288	1.36524	0	0	26.0897	8.69658	2.67129	0.0124195	0.332417	875	0
H2-Q5	chr17;chr17;chr17	35394099;35394357;35394811	35394189;35394626;35395630	+;+;+	1181	5.25711	8.34364	6.97506	6.8586	12.8657	13.8951	15.0518	13.9375	1.02299	0.0127348	0.336233	886	0
Rhpn2	chr7;chr7;chr7;chr7;chr7;chr7;chr7;chr7;chr7;chr7;chr7;chr7;chr7;chr7;chr7	35334237;35353732;35360980;35363617;35370709;35371115;35372305;35376160;35376974;35379565;35381337;35383969;35384638;35385327;35390755	35334411;35353847;35361108;35363692;35370786;35371239;35372471;35376347;35377130;35379684;35381531;35384045;35384784;35385482;35392287	+;+;+;+;+;+;+;+;+;+;+;+;+;+;+	3439	1.05142	2.08591	0.996438	1.37792	0.98967	6.48436	9.03107	5.5017	1.99738	0.013145	0.343589	896	0
Sapcd2	chr2;chr2;chr2;chr2;chr2;chr2;chr2	25372321;25373416;25374952;25375685;25375968;25376164;25376352	25372998;25373517;25375064;25375831;25376075;25376274;25378213	+;+;+;+;+;+;+	3121	4.20569	4.17182	2.98931	3.78894	4.94835	12.9687	10.0345	9.3172	1.2981	0.0133562	0.347217	900	0
Krt17	chr11;chr11;chr11;chr11;chr11;chr11;chr11;chr11	100256217;100257320;100257433;100257743;100258409;100259173;100259695;100260534	100256496;100257345;100257653;100257868;100258570;100259329;100259777;100260989	-;-;-;-;-;-;-;-	1511	2.10285	0	1.99288	1.36524	3.95868	0.926337	20.069	8.31802	2.60709	0.0133978	0.3476	902	0
Ctxn1	chr8;chr8	4257646;4259051	4258647;4259274	-;-	1226	7.35996	4.17182	8.96794	6.83324	14.8451	14.8214	12.0414	13.9026	1.02472	0.0134785	0.348417	906	0
Usp27x	chrX	7372591	7375830	-	3240	8.41138	6.25773	5.97863	6.88258	11.876	17.6004	12.0414	13.8393	1.00775	0.014157	0.356512	930	0
Olfr810	chr10	129790649	129791587	-	939	0	1.04295	2.98931	1.34409	6.92769	2.77901	6.02071	5.24247	1.96362	0.0143073	0.358371	935	0
Ppp1r32	chr19;chr19;chr19;chr19;chr19;chr19;chr19;chr19;chr19;chr19;chr19;chr19;chr19;chr19	10474257;10474490;10474931;10477028;10477205;10477525;10477715;10478197;10478625;10479470;10481284;10481703;10482233;10482828	10474324;10474568;10475101;10477122;10477318;10477611;10477774;10478309;10478688;10479598;10481437;10481820;10482368;10482897	-;-;-;-;-;-;-;-;-;-;-;-;-;-	1458	2.10285	0	0.996438	1.03309	6.92769	3.70535	3.01036	4.5478	2.1382	0.014785	0.363683	952	0
1700012B09Rik	chr9;chr9;chr9;chr9	14758194;14761605;14766857;14770839	14758455;14761730;14766961;14771030	-;-;-;-	685	6.30854	6.25773	7.9715	6.84592	9.8967	23.1584	11.038	14.6977	1.10227	0.0157988	0.375508	985	0
Fank1	chr7;chr7;chr7;chr7;chr7;chr7;chr7;chr7;chr7;chr7;chr7	133776891;133853166;133862103;133868118;133869278;133870022;133876748;133879879;133880272;133880444;133880598	133776970;133853343;133862227;133868199;133869352;133870087;133876913;133880022;133880349;133880488;133881532	+;+;+;+;+;+;+;+;+;+;+	1974	2.10285	3.12886	0.996438	2.07605	5.93802	8.33704	5.01726	6.43077	1.63115	0.0163039	0.382602	998	0
Rdm1	chr11;chr11;chr11;chr11;chr11;chr11;chr11	101627949;101628273;101630238;101630820;101633802;101634788;101635748	101628064;101628452;101630360;101630979;101633900;101634873;101636081	+;+;+;+;+;+;+	1098	4.20569	4.17182	4.98219	4.45323	6.92769	10.1897	13.0449	10.0541	1.17486	0.0165175	0.384916	1005	0
Sema6c	chr3;chr3;chr3;chr3;chr3;chr3;chr3;chr3;chr3;chr3;chr3;chr3;chr3;chr3;chr3;chr3;chr3;chr3;chr3;chr3;chr3	95160420;95162615;95163432;95164339;95167006;95167413;95167624;95167999;95168299;95168587;95168809;95169164;95169582;95169988;95170318;95170751;95171173;95171334;95171558;95171791;95172255	95160712;95162663;95163521;95164513;95167120;95167476;95167726;95168100;95168389;95168706;95168897;95169381;95169713;95170140;95170491;95170897;95171250;95171389;95171602;95171886;95174050	+;+;+;+;+;+;+;+;+;+;+;+;+;+;+;+;+;+;+;+;+	4186	9.4628	5.21477	5.97863	6.8854	14.8451	17.6004	9.03107	13.8255	1.00572	0.0165906	0.385086	1009	0
Ube2ql1	chr13;chr13	69702832;69738558	69704173;69739897	-;-	2682	2.10285	3.12886	0.996438	2.07605	2.96901	7.4107	8.02762	6.13578	1.56341	0.0178069	0.404107	1032	0
Qrfp	chr2;chr2	31806168;31810407	31808918;31810518	-;-	2863	4.20569	3.12886	2.98931	3.44129	5.93802	9.26337	10.0345	8.41197	1.28949	0.0188661	0.419604	1053	0
Agbl3	chr6;chr6;chr6;chr6;chr6;chr6;chr6;chr6;chr6;chr6;chr6;chr6;chr6;chr6;chr6;chr6;chr6;chr6;chr6	34780432;34782100;34783570;34785191;34793882;34798194;34799133;34803443;34812832;34814384;34814711;34823018;34824720;34828192;34832505;34836813;34839325;34846755;34857480	34781059;34782218;34783630;34785376;34793989;34798332;34799909;34803611;34812958;34814484;34814823;34823084;34824800;34828249;34832576;34836858;34839509;34846983;34857932	+;+;+;+;+;+;+;+;+;+;+;+;+;+;+;+;+;+;+	3719	7.35996	1.04295	6.97506	5.12599	13.8554	8.33704	11.038	11.0768	1.11164	0.019277	0.424114	1063	0
Slc9b2	chr3;chr3;chr3;chr3;chr3;chr3;chr3;chr3;chr3;chr3;chr3;chr3;chr3	135307700;135317054;135318280;135321886;135323629;135324509;135326094;135328992;135329768;135330583;135332416;135336354;135342270	135307781;135317193;135318460;135322056;135323771;135324636;135326269;135329098;135329917;135330691;135332552;135336574;135342767	+;+;+;+;+;+;+;+;+;+;+;+;+	2243	8.41138	2.08591	8.96794	6.48841	10.8864	20.3794	10.0345	13.7668	1.08525	0.0192804	0.424114	1064	0
Cadm2	chr16;chr16;chr16;chr16;chr16;chr16;chr16;chr16;chr16;chr16	66655421;66664381;66747199;66771607;66784717;66812730;66815309;66882733;66953274;67620171	66663211;66664506;66747377;66771697;66784887;66812867;66815461;66882882;66953300;67620908	-;-;-;-;-;-;-;-;-;-	9564	0	1.04295	3.98575	1.67623	4.94835	4.63169	7.02416	5.53473	1.72329	0.019406	0.425551	1068	0
Il2rb	chr15;chr15;chr15;chr15;chr15;chr15;chr15;chr15;chr15;chr15	78480549;78483936;78484923;78485732;78486374;78488125;78490182;78490865;78491762;78494948	78482183;78484020;78485043;78485897;78486522;78488230;78490263;78490979;78491879;78495066	-;-;-;-;-;-;-;-;-;-	2696	0	2.08591	0.996438	1.02745	3.95868	0.926337	10.0345	4.97318	2.2751	0.0204091	0.438187	1090	0
Plcl1	chr1;chr1;chr1;chr1;chr1;chr1	55405946;55695745;55701930;55713421;55715494;55751281	55406630;55698219;55702133;55713496;55715603;55754285	+;+;+;+;+;+	6555	5.25711	5.21477	5.97863	5.4835	9.8967	10.1897	15.0518	11.7127	1.09491	0.0207063	0.44166	1098	0
Arxes2	chrX	135993820	135995359	+	1540	2.10285	1.04295	3.98575	2.37718	5.93802	7.4107	7.02416	6.79096	1.51436	0.0209967	0.445418	1104	0
Angpt1	chr15;chr15;chr15;chr15;chr15;chr15;chr15;chr15;chr15	42424725;42438275;42459667;42468156;42476378;42496227;42512284;42523504;42676165	42427130;42438405;42459833;42468257;42476505;42496459;42512405;42523659;42676795	-;-;-;-;-;-;-;-;-	4076	5.25711	3.12886	4.98219	4.45605	10.8864	10.1897	8.02762	9.70123	1.1224	0.0216452	0.454238	1116	0
Gm13476	chr2;chr2;chr2;chr2	45111138;45112260;45112843;45113099	45111302;45112342;45112993;45114084	+;+;+;+	1385	1.05142	1.04295	0.996438	1.03027	2.96901	5.55802	4.01381	4.18028	2.02058	0.0226206	0.463087	1144	0
3010001F23Rik	chrX;chrX;chrX;chrX;chrX;chrX;chrX	152368572;152369028;152369842;152382459;152385645;152403313;152416291	152368694;152369116;152370022;152382530;152385752;152403477;152416702	+;+;+;+;+;+;+	1150	2.10285	1.04295	0	1.0486	2.96901	4.63169	5.01726	4.20599	2.00398	0.0227927	0.464255	1148	0
Igf2bp3	chr6;chr6;chr6;chr6;chr6;chr6;chr6;chr6;chr6;chr6;chr6;chr6;chr6;chr6;chr6	49085218;49087768;49088430;49090976;49094140;49104174;49105570;49107342;49108926;49117152;49134695;49134847;49168470;49213267;49214297	49087440;49087881;49088561;49091050;49094256;49104299;49105705;49107464;49109060;49117433;49134758;49134898;49168518;49213327;49214954	-;-;-;-;-;-;-;-;-;-;-;-;-;-;-	4347	4.20569	10.4295	4.98219	6.53914	15.8347	8.33704	16.0552	13.409	1.03603	0.022803	0.464255	1149	0
Syt13	chr2;chr2;chr2;chr2;chr2;chr2	92915101;92940753;92943052;92945914;92951302;92953363	92915369;92940978;92943186;92946215;92951431;92956051	+;+;+;+;+;+	3751	3.15427	3.12886	0.996438	2.42652	3.95868	9.26337	7.02416	6.74874	1.47573	0.0228457	0.464255	1151	0
Ifi47	chr11;chr11;chr11;chr11	49076587;49087017;49091760;49095389	49076662;49087144;49091969;49096987	+;+;+;+	2013	5.25711	2.08591	2.98931	3.44411	4.94835	14.8214	6.02071	8.59682	1.31967	0.0233024	0.470062	1161	0
Trim66	chr7;chr7;chr7;chr7;chr7;chr7;chr7;chr7;chr7;chr7;chr7;chr7;chr7;chr7;chr7;chr7;chr7;chr7;chr7;chr7;chr7	109449001;109455002;109455632;109456062;109457046;109457548;109458111;109458741;109460158;109460493;109472234;109475052;109477638;109480926;109481883;109483032;109483638;109484578;109486047;109493307;109507741	109454034;109455245;109455784;109456136;109457172;109457834;109458285;109458801;109460350;109461014;109472395;109475959;109477755;109481072;109481997;109483148;109483770;109484725;109486150;109493738;109508134	-;-;-;-;-;-;-;-;-;-;-;-;-;-;-;-;-;-;-;-;-	9649	1.05142	8.34364	5.97863	5.12456	10.8864	10.1897	11.038	10.7047	1.06274	0.0236542	0.473208	1170	0
Gm13375	chr2;chr2	20968874;20969474	20969383;20970348	+;+	1385	0	2.08591	0.996438	1.02745	8.90703	3.70535	1.00345	4.53861	2.14318	0.0244856	0.481489	1191	0
Hoxa13	chr6;chr6	52258853;52259864	52259148;52260880	-;-	1313	5.25711	4.17182	1.99288	3.80727	8.90703	4.63169	12.0414	8.52671	1.16323	0.0270374	0.512513	1235	0
Dnahc8	chr17;chr17;chr17;chr17;chr17;chr17;chr17;chr17;chr17;chr17;chr17;chr17;chr17;chr17;chr17;chr17;chr17;chr17;chr17;chr17;chr17;chr17;chr17;chr17;chr17;chr17;chr17;chr17;chr17;chr17;chr17;chr17;chr17;chr17;chr17;chr17;chr17;chr17;chr17;chr17;chr17;chr17;chr17;chr17;chr17;chr17;chr17;chr17;chr17;chr17;chr17;chr17;chr17;chr17;chr17;chr17;chr17;chr17;chr17;chr17;chr17;chr17;chr17;chr17;chr17;chr17;chr…	30626936;30635321;30635942;30643256;30644557;30648416;30649624;30653233;30656577;30656886;30657969;30661986;30663298;30668274;30670612;30672240;30673780;30677087;30683631;30684131;30686383;30690181;30693949;30695110;30700390;30701845;30704655;30706385;30708291;30710502;30712273;30713034;30715480;30717764;30718827;30720999;30722899;30725082;30726786;30728163;30729081;30731014;30736029;30737251;307…	30627142;30635833;30636076;30643340;30644708;30648605;30649787;30653409;30656690;30656993;30658070;30662132;30663495;30668350;30670711;30672359;30673915;30677274;30683711;30684247;30686502;30690316;30694061;30695216;30700462;30702031;30704851;30706511;30708526;30710606;30712386;30713096;30715580;30717901;30719067;30721198;30723052;30725245;30726888;30728267;30729242;30731238;30736201;30737429;307…	+;+;+;+;+;+;+;+;+;+;+;+;+;+;+;+;+;+;+;+;+;+;+;+;+;+;+;+;+;+;+;+;+;+;+;+;+;+;+;+;+;+;+;+;+;+;+;+;+;+;+;+;+;+;+;+;+;+;+;+;+;+;+;+;+;+;+;+;+;+;+;+;+;+;+;+;+;+;+;+;+;+;+;+;+;+;+;+;+;+;+;+;+	14583	1.05142	2.08591	0.996438	1.37792	0.98967	5.55802	8.02762	4.85844	1.818	0.0271508	0.513043	1238	0
Ankle1	chr8;chr8;chr8;chr8;chr8;chr8;chr8;chr8;chr8	71406012;71406187;71406679;71406862;71407213;71407871;71408665;71408922;71409227	71406097;71406339;71406784;71406973;71407749;71408042;71408824;71409051;71409904	+;+;+;+;+;+;+;+;+	2134	5.25711	9.38659	0.996438	5.21338	15.8347	9.26337	9.03107	11.3764	1.12575	0.0288759	0.531662	1272	0
Tmem163	chr1;chr1;chr1;chr1;chr1;chr1;chr1;chr1	127490342;127495718;127500184;127519345;127551326;127552761;127668651;127677431	127491660;127495859;127500295;127519441;127551417;127552804;127668770;127678021	-;-;-;-;-;-;-;-	2517	5.25711	5.21477	3.98575	4.81921	9.8967	8.33704	13.0449	10.4262	1.11334	0.0294594	0.535199	1288	0
Gsta2	chr9;chr9;chr9;chr9;chr9;chr9;chr9	78331020;78332087;78333761;78337559;78338645;78341830;78347089	78331249;78332218;78333902;78337691;78338696;78341938;78347145	-;-;-;-;-;-;-	855	2.10285	3.12886	4.98219	3.40463	3.95868	13.8951	7.02416	8.29264	1.28433	0.0297645	0.538967	1293	0
Vgf	chr5;chr5	137030295;137030966	137030461;137033351	+;+	2553	4.20569	4.17182	1.99288	3.45679	6.92769	5.55802	12.0414	8.17571	1.24191	0.0301312	0.542825	1300	0
Irx5	chr8;chr8;chr8	92357796;92359537;92360094	92358429;92359942;92361456	+;+;+	2403	3.15427	2.08591	1.99288	2.41102	5.93802	5.55802	7.02416	6.1734	1.35642	0.0306224	0.548719	1307	0
Iigp1	chr18;chr18;chr18	60376029;60382612;60389792	60376130;60382794;60392629	+;+;+	3123	3.15427	2.08591	1.99288	2.41102	4.94835	5.55802	8.02762	6.178	1.3575	0.0313632	0.555617	1322	0
Gabra3	chrX;chrX;chrX;chrX;chrX;chrX;chrX;chrX;chrX;chrX	72432676;72445175;72451504;72459589;72476226;72501079;72511305;72540063;72552677;72656007	72434984;72445386;72451656;72459732;72476308;72501299;72511372;72540184;72552851;72656246	-;-;-;-;-;-;-;-;-;-	3727	1.05142	1.04295	1.99288	1.36242	5.93802	3.70535	4.01381	4.55239	1.74046	0.0327269	0.564407	1358	0
4930556M19Rik	chr15;chr15;chr15;chr15;chr15;chr15;chr15;chr15;chr15	10714836;10716648;10719064;10720729;10767435;10768108;10769023;10788326;10788615	10714980;10716774;10719429;10722211;10767558;10768201;10769347;10788502;10790123	+;+;+;+;+;+;+;+;+	4350	0	2.08591	3.98575	2.02389	3.95868	3.70535	10.0345	5.89952	1.54347	0.0329843	0.566758	1363	0
1700112E06Rik	chr14;chr14;chr14;chr14;chr14;chr14;chr14	22019712;22027227;22577848;22584406;22596425;22828689;23055955	22019908;22027327;22577974;22584545;22596542;22828782;23056088	+;+;+;+;+;+;+	911	1.05142	2.08591	0.996438	1.37792	5.93802	2.77901	5.01726	4.5781	1.73225	0.0332842	0.568574	1371	0
Saa1	chr7;chr7;chr7;chr7	46740499;46741256;46742432;46742949	46740842;46741394;46742523;46742980	-;-;-;-	607	3.15427	1.04295	3.98575	2.72766	2.96901	11.116	7.02416	7.03641	1.36718	0.0349533	0.580439	1409	0
Trp63	chr16;chr16;chr16;chr16;chr16;chr16;chr16;chr16;chr16;chr16;chr16;chr16;chr16;chr16;chr16;chr16	25683765;25763266;25764164;25801916;25820388;25862279;25863675;25865247;25866075;25868167;25870997;25876627;25882527;25884811;25886206;25889008	25684351;25763394;25764296;25802101;25820642;25862465;25863790;25865356;25866211;25868249;25871133;25877143;25882684;25884955;25886299;25892088	+;+;+;+;+;+;+;+;+;+;+;+;+;+;+;+	6055	2.10285	1.04295	0	1.0486	3.95868	3.70535	4.01381	3.89261	1.89227	0.0368051	0.596522	1445	0
Aard	chr15;chr15	52040107;52044799	52040530;52045722	+;+	1348	4.20569	2.08591	3.98575	3.42578	6.92769	7.4107	9.03107	7.78982	1.18516	0.0376138	0.602953	1461	0
Gap43	chr16;chr16;chr16	42248561;42291799;42340473	42249114;42292366;42340651	-;-;-	1301	3.15427	5.21477	3.98575	4.11826	8.90703	11.116	6.02071	8.68126	1.07587	0.0380308	0.606789	1467	0
Cyp2f2	chr7;chr7;chr7;chr7;chr7;chr7;chr7;chr7;chr7;chr7	27119955;27121551;27121835;27124854;27129191;27129717;27130294;27131170;27132474;27133216	27120015;27121741;27121997;27125003;27129351;27129893;27130435;27131357;27132615;27133660	+;+;+;+;+;+;+;+;+;+	1820	3.15427	2.08591	2.98931	2.74316	6.92769	8.33704	5.01726	6.76066	1.30132	0.0386548	0.611272	1481	0
Fgf13	chrX;chrX;chrX;chrX;chrX	59062150;59067401;59125894;59131840;59133877	59063669;59067599;59125997;59131950;59134436	-;-;-;-;-	2494	0	1.04295	2.98931	1.34409	3.95868	7.4107	2.0069	4.45876	1.73001	0.0387174	0.611438	1483	0
Clstn2	chr9;chr9;chr9;chr9;chr9;chr9;chr9;chr9;chr9;chr9;chr9;chr9;chr9;chr9;chr9;chr9;chr9;chr9	97444395;97454583;97456426;97457313;97457547;97458094;97461340;97463465;97469691;97482939;97526304;97532612;97541732;97570560;97582458;97583503;97799348;98032861	97445713;97454743;97456610;97457436;97457692;97458264;97461563;97463613;97469857;97483101;97526425;97532860;97541917;97570709;97582666;97583698;97799470;98033167	-;-;-;-;-;-;-;-;-;-;-;-;-;-;-;-;-;-	4351	1.05142	4.17182	4.98219	3.40181	8.90703	6.48436	8.02762	7.80634	1.19834	0.038899	0.613265	1485	0
Ghrl	chr6;chr6;chr6;chr6;chr6	113716119;113717053;113719110;113719322;113719864	113716269;113717161;113719226;113719454;113719880	-;-;-;-;-	527	1.05142	2.08591	0	1.04578	1.97934	6.48436	3.01036	3.82469	1.87077	0.0407014	0.628364	1517	0
Fam212a	chr9;chr9	107984224;107985697	107985064;107985916	-;-	1061	2.10285	3.12886	2.98931	2.74034	1.97934	7.4107	12.0414	7.14382	1.38234	0.0408401	0.62926	1520	0
H2-Ab1	chr17;chr17;chr17;chr17;chr17;chr17	34263227;34264761;34267336;34267923;34268461;34269095	34263405;34265033;34267617;34268033;34268484;34269418	+;+;+;+;+;+	1193	1.05142	0	4.98219	2.0112	7.91736	3.70535	5.01726	5.54666	1.46356	0.043227	0.649601	1558	0
Syt17	chr7;chr7;chr7;chr7;chr7;chr7;chr7;chr7	118381856;118408025;118409924;118433833;118436823;118442348;118443119;118443346	118382052;118408180;118410044;118434452;118436971;118442496;118443136;118443552	-;-;-;-;-;-;-;-	1617	4.20569	0	3.98575	2.73048	3.95868	8.33704	8.02762	6.77444	1.31095	0.0433345	0.650156	1561	0
Lrrc29	chr8;chr8;chr8;chr8;chr8	105312340;105313045;105315076;105323265;105326227	105312945;105313262;105316022;105323366;105326276	-;-;-;-;-	1923	1.05142	1.04295	0.996438	1.03027	1.97934	7.4107	2.0069	3.79898	1.88259	0.0444884	0.658472	1581	0
Fam161b	chr12;chr12;chr12;chr12;chr12;chr12;chr12;chr12	84345317;84348277;84348606;84353800;84354710;84355924;84357528;84361692	84346935;84348376;84348770;84353927;84355047;84356477;84357850;84361821	-;-;-;-;-;-;-;-	3357	4.20569	3.12886	3.98575	3.77343	7.91736	10.1897	6.02071	8.04259	1.09178	0.0448555	0.658526	1594	0
Cdkn2a	chr4;chr4;chr4;chr4	89274473;89276645;89281986;89294334	89274774;89276985;89282192;89294619	-;-;-;-	1136	2.10285	4.17182	0.996438	2.4237	5.93802	5.55802	6.02071	5.83892	1.26849	0.046305	0.670177	1618	0
Pcdhb21	chr18	37513652	37516363	+	2712	4.20569	1.04295	0.996438	2.08169	8.90703	6.48436	2.0069	5.79943	1.47815	0.0465418	0.672015	1622	0
Gucy1a2	chr9;chr9;chr9;chr9;chr9;chr9;chr9;chr9	3532349;3579518;3582579;3634439;3759396;3797238;3865358;3894504	3533099;3579579;3582700;3635157;3759881;3797381;3865512;3905787	+;+;+;+;+;+;+;+	13723	2.10285	2.08591	5.97863	3.38913	3.95868	7.4107	12.0414	7.8036	1.20323	0.0491937	0.691971	1664	0

## Sheet: RNAseq-UP_KEGG
LOG2FC<H63:H81-1
Category	Term	Count	%	PValue	Genes	List Total	Pop Hits	Pop Total	Fold Enrichment	Bonferroni	Benjamini	FDR
KEGG_PATHWAY	mmu05323:Rheumatoid arthritis	7	0.0391477	5.5908e-05	TNFSF11, CCL20, ACP5, ANGPT1, H2-AB1, CCL5, IL1A	65	82	7691	10.1008	0.00763035	0.00763035	0.0656955
KEGG_PATHWAY	mmu04060:Cytokine-cytokine receptor interaction	9	0.0503328	0.000825881	CSF3, TNFRSF9, IL2RB, IL12RB1, TNFSF11, IL18RAP, CCL20, CCL5, IL1A	65	242	7691	4.40045	0.107021	0.0550245	0.966455
KEGG_PATHWAY	mmu04610:Complement and coagulation cascades	5	0.0279626	0.00357397	F5, CFB, BDKRB1, SERPIND1, C2	65	76	7691	7.78441	0.387687	0.150837	4.12111
KEGG_PATHWAY	mmu05321:Inflammatory bowel disease (IBD)	4	0.0223701	0.0128295	IL12RB1, IL18RAP, H2-AB1, IL1A	65	59	7691	8.0219	0.8295	0.357414	14.082
KEGG_PATHWAY	mmu05164:Influenza A	6	0.0335552	0.0135851	H2-AB1, IL33, CCL5, CASP1, NLRP3, IL1A	65	171	7691	4.15169	0.846478	0.312561	14.8517
KEGG_PATHWAY	mmu05133:Pertussis	4	0.0223701	0.0234338	C2, CASP1, NLRP3, IL1A	65	74	7691	6.39584	0.961173	0.418091	24.3251

## Sheet: RNAseq-UP_GObp
Up-regulated gene_GO biological process (Pvalue<0.05)
Category	Term	Count	%	PValue	Genes	List Total	Pop Hits	Pop Total	Fold Enrichment	Bonferroni	Benjamini	FDR
GOTERM_BP_DIRECT	GO:0009887~organ morphogenesis	7	4.26829	0.000181115	GREM1, WNT2B, WNT5A, TNFSF11, TRP63, HOXA13, FGF10	138	109	18082	8.41471	0.187743	0.20792	0.20792
GOTERM_BP_DIRECT	GO:0071346~cellular response to interferon-gamma	5	3.04878	0.00176479	CCL20, CCL5, WNT5A, IL12RB1, H2-AB1	138	68	18082	9.63448	0.868371	0.821098	0.821098
GOTERM_BP_DIRECT	GO:0030308~negative regulation of cell growth	6	3.65854	0.00263197	GREM1, CDKN2D, SFRP1, CDKN2A, BDKRB1, MNDAL	138	125	18082	6.28939	0.951466	0.821098	0.821098
GOTERM_BP_DIRECT	GO:0071347~cellular response to interleukin-1	5	3.04878	0.00319631	SFRP1, CCL20, CCL5, SAA3, LCN2	138	80	18082	8.18931	0.974657	0.821098	0.821098
GOTERM_BP_DIRECT	GO:0006955~immune response	8	4.87805	0.00472626	IL1A, CSF3, CCL20, CCL5, TNFRSF9, TNFSF11, CD244, H2-AB1	138	272	18082	3.85379	0.995654	0.821098	0.821098
GOTERM_BP_DIRECT	GO:0030154~cell differentiation	14	8.53659	0.00634181	CALR3, SEMA6C, ANGPT1, WNT5A, TRP63, NKD1, PSMB8, SYT17, GAP43, SFRP1, ANGPTL6, TNFSF11, 1700112E06RIK, ANG	138	780	18082	2.3518	0.999327	0.821098	0.821098
GOTERM_BP_DIRECT	GO:0007267~cell-cell signaling	5	3.04878	0.00782092	GREM1, WNT2B, CCL5, WNT5A, FGF10	138	103	18082	6.36063	0.999878	0.821098	0.821098
GOTERM_BP_DIRECT	GO:0048546~digestive tract morphogenesis	3	1.82927	0.00805302	SFRP1, WNT5A, STRA6	138	18	18082	21.8382	0.999907	0.821098	0.821098
GOTERM_BP_DIRECT	GO:0002376~immune system process	9	5.4878	0.00883422	NLRC5, LCN2, NLRP3, PSMB8, CFB, IIGP1, CD244, H2-AB1, C2	138	383	18082	3.07901	0.999962	0.821098	0.821098
GOTERM_BP_DIRECT	GO:0051092~positive regulation of NF-kappaB transcription factor activity	5	3.04878	0.00950607	GREM1, RPS6KA5, WNT5A, TNFSF11, NLRP3	138	109	18082	6.0105	0.999983	0.821098	0.821098
GOTERM_BP_DIRECT	GO:0043066~negative regulation of apoptotic process	11	6.70732	0.0110327	PLAC8, GREM1, SFRP1, SERPINB2, ANGPT1, BDNF, WNT5A, IL2RB, TRP63, GHRL, FMN2	138	566	18082	2.5465	0.999997	0.821098	0.821098
GOTERM_BP_DIRECT	GO:0045087~innate immune response	9	5.4878	0.0112819	NLRC5, LCN2, NLRP3, PTX3, ANG, CFB, IIGP1, CD244, C2	138	400	18082	2.94815	0.999998	0.821098	0.821098
GOTERM_BP_DIRECT	GO:0050718~positive regulation of interleukin-1 beta secretion	3	1.82927	0.0119207	WNT5A, CASP1, NLRP3	138	22	18082	17.8676	0.999999	0.821098	0.821098
GOTERM_BP_DIRECT	GO:0030326~embryonic limb morphogenesis	4	2.43902	0.0121349	GREM1, FBN2, WNT5A, TRP63	138	63	18082	8.3193	0.999999	0.821098	0.821098
GOTERM_BP_DIRECT	GO:0070374~positive regulation of ERK1 and ERK2 cascade	6	3.65854	0.0142937	IL1A, ANGPT1, CCL20, CCL5, PLA2G5, FGF10	138	188	18082	4.18178	1	0.821098	0.821098
GOTERM_BP_DIRECT	GO:0046851~negative regulation of bone remodeling	2	1.21951	0.0150962	GREM1, SFRP1	138	2	18082	131.029	1	0.821098	0.821098
GOTERM_BP_DIRECT	GO:0007214~gamma-aminobutyric acid signaling pathway	3	1.82927	0.0152542	BDNF, PLCL1, GABRA3	138	25	18082	15.7235	1	0.821098	0.821098
GOTERM_BP_DIRECT	GO:0006954~inflammatory response	8	4.87805	0.0159429	IL1A, TPSB2, RPS6KA5, CCL20, CCL5, TNFRSF9, NLRP3, BDKRB1	138	344	18082	3.04719	1	0.821098	0.821098
GOTERM_BP_DIRECT	GO:0046330~positive regulation of JNK cascade	4	2.43902	0.016101	IL1A, WNT5A, TNFSF11, TPD52L1	138	70	18082	7.48737	1	0.821098	0.821098
GOTERM_BP_DIRECT	GO:0033138~positive regulation of peptidyl-serine phosphorylation	4	2.43902	0.0186566	CSF3, ANGPT1, BDNF, WNT5A	138	74	18082	7.08265	1	0.821098	0.821098
GOTERM_BP_DIRECT	GO:0045944~positive regulation of transcription from RNA polymerase II promoter	15	9.14634	0.0187541	IL33, CSF3, CDKN2A, WNT5A, NLRC5, TRP63, HOXA13, PLAC8, GREM1, IL1A, RPS6KA5, ID4, TNFSF11, NLRP3, FGF10	138	995	18082	1.97531	1	0.821098	0.821098
GOTERM_BP_DIRECT	GO:0035108~limb morphogenesis	3	1.82927	0.0189387	FBN2, WNT5A, FGF10	138	28	18082	14.0388	1	0.821098	0.821098
GOTERM_BP_DIRECT	GO:0048791~calcium ion-regulated exocytosis of neurotransmitter	3	1.82927	0.0189387	SYT13, SYT7, SYT17	138	28	18082	14.0388	1	0.821098	0.821098
GOTERM_BP_DIRECT	GO:0050679~positive regulation of epithelial cell proliferation	4	2.43902	0.0200138	SFRP1, CCL5, WNT5A, FGF10	138	76	18082	6.89626	1	0.821098	0.821098
GOTERM_BP_DIRECT	GO:0042327~positive regulation of phosphorylation	3	1.82927	0.0215815	CCL5, TNFSF11, ANG	138	30	18082	13.1029	1	0.821098	0.821098
GOTERM_BP_DIRECT	GO:0045444~fat cell differentiation	4	2.43902	0.0221493	STEAP4, ID4, ARXES2, PSMB8	138	79	18082	6.63438	1	0.821098	0.821098
GOTERM_BP_DIRECT	GO:0008284~positive regulation of cell proliferation	10	6.09756	0.0223174	PLAC8, GREM1, SFRP1, CSF3, MARCKSL1, CLEC11A, WNT5A, ID4, S100B, FGF10	138	542	18082	2.41751	1	0.821098	0.821098
GOTERM_BP_DIRECT	GO:0034112~positive regulation of homotypic cell-cell adhesion	2	1.21951	0.0225592	CCL5, TNFSF11	138	3	18082	87.3527	1	0.821098	0.821098
GOTERM_BP_DIRECT	GO:0060638~mesenchymal-epithelial cell signaling	2	1.21951	0.0225592	WNT2B, WNT5A	138	3	18082	87.3527	1	0.821098	0.821098
GOTERM_BP_DIRECT	GO:0048807~female genitalia morphogenesis	2	1.21951	0.0225592	TRP63, FGF10	138	3	18082	87.3527	1	0.821098	0.821098
GOTERM_BP_DIRECT	GO:0046546~development of primary male sexual characteristics	2	1.21951	0.0225592	SFRP1, WNT5A	138	3	18082	87.3527	1	0.821098	0.821098
GOTERM_BP_DIRECT	GO:0014070~response to organic cyclic compound	4	2.43902	0.0228877	SFRP1, CDKN2A, CASP1, ACACB	138	80	18082	6.55145	1	0.821098	0.821098
GOTERM_BP_DIRECT	GO:0007275~multicellular organism development	15	9.14634	0.0242182	SEMA6C, WNT2B, ANGPT1, TNFRSF9, WNT5A, TRP63, FMN2, HOXA13, NKD1, GAP43, SFRP1, ANGPTL6, KIF26B, TNFSF11, ANG	138	1029	18082	1.91004	1	0.825996	0.825996
GOTERM_BP_DIRECT	GO:0019221~cytokine-mediated signaling pathway	5	3.04878	0.0251015	IL1A, PODNL1, IL2RB, TNFSF11, IIGP1	138	146	18082	4.48729	1	0.825996	0.825996
GOTERM_BP_DIRECT	GO:0007613~memory	4	2.43902	0.0251828	KCNK10, CASP1, FGF13, S100B	138	83	18082	6.31465	1	0.825996	0.825996
GOTERM_BP_DIRECT	GO:0007411~axon guidance	5	3.04878	0.0268537	SEMA6C, GAP43, BDNF, KIF26B, WNT5A	138	149	18082	4.39695	1	0.841269	0.841269
GOTERM_BP_DIRECT	GO:0008285~negative regulation of cell proliferation	8	4.87805	0.0271141	CDKN2D, IL1A, SFRP1, SCIN, CDKN2A, NRK, TNFRSF9, FGF10	138	384	18082	2.72977	1	0.841269	0.841269
GOTERM_BP_DIRECT	GO:0050728~negative regulation of inflammatory response	4	2.43902	0.0284287	ACP5, NLRP3, GHRL, PLA2G5	138	87	18082	6.02432	1	0.847898	0.847898
GOTERM_BP_DIRECT	GO:0031069~hair follicle morphogenesis	3	1.82927	0.0288049	KRT17, TRP63, FGF10	138	35	18082	11.2311	1	0.847898	0.847898
GOTERM_BP_DIRECT	GO:2001206~positive regulation of osteoclast development	2	1.21951	0.0299661	TNFSF11, SLC9B2	138	4	18082	65.5145	1	0.860028	0.860028
GOTERM_BP_DIRECT	GO:0042060~wound healing	4	2.43902	0.0346173	SERPINB2, CCL20, WNT5A, FGF10	138	94	18082	5.5757	1	0.969284	0.969284
GOTERM_BP_DIRECT	GO:0060157~urinary bladder development	2	1.21951	0.0373173	WNT5A, TRP63	138	5	18082	52.4116	1	0.977516	0.977516
GOTERM_BP_DIRECT	GO:0060513~prostatic bud formation	2	1.21951	0.0373173	TRP63, FGF10	138	5	18082	52.4116	1	0.977516	0.977516
GOTERM_BP_DIRECT	GO:0051897~positive regulation of protein kinase B signaling	4	2.43902	0.0374658	CSF3, ANGPT1, FAM110C, TNFSF11	138	97	18082	5.40326	1	0.977516	0.977516
GOTERM_BP_DIRECT	GO:0051262~protein tetramerization	3	1.82927	0.038551	CCL5, TRP63, TRPM3	138	41	18082	9.58749	1	0.983479	0.983479
GOTERM_BP_DIRECT	GO:0043065~positive regulation of apoptotic process	7	4.26829	0.0423876	SFRP1, SCIN, USP27X, BDNF, CDKN2A, CASP1, S100B	138	335	18082	2.73792	1	1	1
GOTERM_BP_DIRECT	GO:0090090~negative regulation of canonical Wnt signaling pathway	4	2.43902	0.0424715	GREM1, SFRP1, WNT5A, NKD1	138	102	18082	5.13839	1	1	1
GOTERM_BP_DIRECT	GO:2000052~positive regulation of non-canonical Wnt signaling pathway	2	1.21951	0.0446132	SFRP1, WNT5A	138	6	18082	43.6763	1	1	1
GOTERM_BP_DIRECT	GO:2000271~positive regulation of fibroblast apoptotic process	2	1.21951	0.0446132	SFRP1, TRP63	138	6	18082	43.6763	1	1	1
GOTERM_BP_DIRECT	GO:0030514~negative regulation of BMP signaling pathway	3	1.82927	0.047489	GREM1, SFRP1, WNT5A	138	46	18082	8.54537	1	1	1
GOTERM_BP_DIRECT	GO:0035019~somatic stem cell population maintenance	3	1.82927	0.047489	SFRP1, CDKN2A, FGF10	138	46	18082	8.54537	1	1	1

## Sheet: RNAseq-UP+MBDseq-TSS
Up-regulated gene+Methylated peaks in TSS ± 50 kb
OFFICIAL_GENE_SYMBOL	Name
Tnn	tenascin N(Tnn)
Glipr1	GLI pathogenesis-related 1 (glioma)(Glipr1)
Hunk	hormonally upregulated Neu-associated kinase(Hunk)
Syt7	synaptotagmin VII(Syt7)
Trpm3	transient receptor potential cation channel, subfamily M, member 3(Trpm3)
Stra6	stimulated by retinoic acid gene 6(Stra6)
Ly75	lymphocyte antigen 75(Ly75)
Psma8	proteasome (prosome, macropain) subunit, alpha type, 8(Psma8)
Ppp1r32	protein phosphatase 1, regulatory subunit 32(Ppp1r32)
Car6	carbonic anhydrase 6(Car6)
Ccl20	chemokine (C-C motif) ligand 20(Ccl20)
Sapcd2	suppressor APC domain containing 2(Sapcd2)
Lcn2	lipocalin 2(Lcn2)
Nrk	Nik related kinase(Nrk)
Siglecg	sialic acid binding Ig-like lectin G(Siglecg)
Arxes2	adipocyte-related X-chromosome expressed sequence 2(Arxes2)
Prss46	protease, serine 46(Prss46)
Ube2ql1	ubiquitin-conjugating enzyme E2Q family-like 1(Ube2ql1)
Acp5	acid phosphatase 5, tartrate resistant(Acp5)
Ctxn1	cortexin 1(Ctxn1)
Angptl6	angiopoietin-like 6(Angptl6)
Grem1	gremlin 1, DAN family BMP antagonist(Grem1)
Vgf	VGF nerve growth factor inducible(Vgf)
Fank1	fibronectin type 3 and ankyrin repeat domains 1(Fank1)
Ccl5	chemokine (C-C motif) ligand 5(Ccl5)
Fgf13	fibroblast growth factor 13(Fgf13)
Wnt5a	wingless-type MMTV integration site family, member 5A(Wnt5a)
Tnfsf11	tumor necrosis factor (ligand) superfamily, member 11(Tnfsf11)
Tnfrsf9	tumor necrosis factor receptor superfamily, member 9(Tnfrsf9)
C2	complement component 2 (within H-2S)(C2)
Clec11a	C-type lectin domain family 11, member a(Clec11a)
Ang	angiogenin, ribonuclease, RNase A family, 5(Ang)
Krt5	keratin 5(Krt5)
Gm10845	predicted gene 10845(Gm10845)
Cdkn2d	cyclin-dependent kinase inhibitor 2D (p19, inhibits CDK4)(Cdkn2d)
Cd244	CD244 natural killer cell receptor 2B4(Cd244)
3830403N18Rik	RIKEN cDNA 3830403N18 gene(3830403N18Rik)
Wnt2b	wingless-type MMTV integration site family, member 2B(Wnt2b)
Pla2g5	phospholipase A2, group V(Pla2g5)
Col7a1	collagen, type VII, alpha 1(Col7a1)
Zfp575	zinc finger protein 575(Zfp575)
Agbl3	ATP/GTP binding protein-like 3(Agbl3)
Cyp2f2	cytochrome P450, family 2, subfamily f, polypeptide 2(Cyp2f2)
Zfp618	zinc finger protein 618(Zfp618)
Slc9b2	solute carrier family 9, subfamily B (NHA2, cation proton antiporter 2), member 2(Slc9b2)
Pif1	PIF1 5'-to-3' DNA helicase(Pif1)
Marcksl1	MARCKS-like 1(Marcksl1)
H2-Q5	histocompatibility 2, Q region locus 5(H2-Q5)
Syt17	synaptotagmin XVII(Syt17)
Trim66	tripartite motif-containing 66(Trim66)
Xlr	X-linked lymphocyte-regulated(Xlr)
Nlrc5	NLR family, CARD domain containing 5(Nlrc5)
Rps6ka5	ribosomal protein S6 kinase, polypeptide 5(Rps6ka5)
Ska1	spindle and kinetochore associated complex subunit 1(Ska1)
3010001F23Rik	RIKEN cDNA 3010001F23 gene(3010001F23Rik)
Usp27x	ubiquitin specific peptidase 27, X chromosome(Usp27x)
Hscb	HscB iron-sulfur cluster co-chaperone(Hscb)
Krt17	keratin 17(Krt17)
A430078G23Rik	RIKEN cDNA A430078G23 gene(A430078G23Rik)
Rhpn2	rhophilin, Rho GTPase binding protein 2(Rhpn2)
Nlrp3	NLR family, pyrin domain containing 3(Nlrp3)
Gm12505	predicted gene 12505(Gm12505)
U90926	cDNA sequence U90926(U90926)
S100b	S100 protein, beta polypeptide, neural(S100b)
Cfb	complement factor B(Cfb)
Eln	elastin(Eln)
Kif26b	kinesin family member 26B(Kif26b)
1700112E06Rik	RIKEN cDNA 1700112E06 gene(1700112E06Rik)
Hyls1	hydrolethalus syndrome 1(Hyls1)
Il12rb1	interleukin 12 receptor, beta 1(Il12rb1)
AI662270	expressed sequence AI662270(AI662270)
Bdkrb1	bradykinin receptor, beta 1(Bdkrb1)
Psmb8	proteasome (prosome, macropain) subunit, beta type 8 (large multifunctional peptidase 7)(Psmb8)
Sptbn2	spectrin beta, non-erythrocytic 2(Sptbn2)
Pnp2	purine-nucleoside phosphorylase 2(Pnp2)
Il2rb	interleukin 2 receptor, beta chain(Il2rb)
AA467197	expressed sequence AA467197(AA467197)
Ankle1	ankyrin repeat and LEM domain containing 1(Ankle1)
Podnl1	podocan-like 1(Podnl1)
Id4	inhibitor of DNA binding 4(Id4)
Kcnk10	potassium channel, subfamily K, member 10(Kcnk10)
Ghrl	ghrelin(Ghrl)
Ifi47	interferon gamma inducible protein 47(Ifi47)
Gabra3	gamma-aminobutyric acid (GABA) A receptor, subunit alpha 3(Gabra3)
Gm19757	predicted gene, 19757(Gm19757)
Il33	interleukin 33(Il33)
Qrfp	pyroglutamylated RFamide peptide(Qrfp)
Lrrc29	leucine rich repeat containing 29(Lrrc29)
Sema6c	sema domain, transmembrane domain (TM), and cytoplasmic domain, (semaphorin) 6C(Sema6c)
Slc39a4	solute carrier family 39 (zinc transporter), member 4(Slc39a4)
Igf2bp3	insulin-like growth factor 2 mRNA binding protein 3(Igf2bp3)
Fam212a	family with sequence similarity 212, member A(Fam212a)
F5	coagulation factor V(F5)
Abhd15	abhydrolase domain containing 15(Abhd15)
Csf3	colony stimulating factor 3 (granulocyte)(Csf3)
Slc47a1	solute carrier family 47, member 1(Slc47a1)
Tpsb2	tryptase beta 2(Tpsb2)
Sfrp1	secreted frizzled-related protein 1(Sfrp1)
4930556M19Rik	RIKEN cDNA 4930556M19 gene(4930556M19Rik)
Acacb	acetyl-Coenzyme A carboxylase beta(Acacb)
Plac8	placenta-specific 8(Plac8)
Arg2	arginase type II(Arg2)
Serpind1	serine (or cysteine) peptidase inhibitor, clade D, member 1(Serpind1)
Syt13	synaptotagmin XIII(Syt13)
Mnd1	meiotic nuclear divisions 1(Mnd1)

## Sheet: RNAseq-UP+MBDseq-TSS_KEGG
Up-regulated gene+Methylated peaks in TSS ± 50 kb_KEGG pathway (Pvalue<0.05)
Category	Term	Count	%	PValue	Genes	List Total	Pop Hits	Pop Total	Fold Enrichment	Bonferroni	Benjamini	FDR
KEGG_PATHWAY	mmu04610:Complement and coagulation cascades	5	4.7619	0.000741568	F5, CFB, BDKRB1, SERPIND1, C2	43	76	7691	11.7671	0.068049	0.068049	0.812122
KEGG_PATHWAY	mmu04060:Cytokine-cytokine receptor interaction	7	6.66667	0.0018496	CSF3, TNFRSF9, IL2RB, IL12RB1, TNFSF11, CCL20, CCL5	43	242	7691	5.17365	0.161277	0.0841819	2.01441
KEGG_PATHWAY	mmu05323:Rheumatoid arthritis	4	3.80952	0.00994448	TNFSF11, CCL20, ACP5, CCL5	43	82	7691	8.7249	0.613048	0.271294	10.4038
KEGG_PATHWAY	mmu04668:TNF signaling pathway	4	3.80952	0.0213016	RPS6KA5, CCL20, IFI47, CCL5	43	109	7691	6.56369	0.870687	0.400333	21.0755

## Sheet: RNAseq-UP+MBDseq-TSS_GObp
Up-regulated gene+Methylated peaks in TSS ± 50 kb_GO biological process (Pvalue<0.05)
Category	Term	Count	%	PValue	Genes	List Total	Pop Hits	Pop Total	Fold Enrichment	Bonferroni	Benjamini	FDR
GOTERM_BP_DIRECT	GO:0051092~positive regulation of NF-kappaB transcription factor activity	5	4.7619	0.00181529	RPS6KA5, WNT5A, TNFSF11, GREM1, NLRP3	87	109	18082	9.5339	0.759803	0.759803	2.74373
GOTERM_BP_DIRECT	GO:0048546~digestive tract morphogenesis	3	2.85714	0.00325567	WNT5A, SFRP1, STRA6	87	18	18082	34.6398	0.922685	0.721945	4.87056
GOTERM_BP_DIRECT	GO:0071346~cellular response to interferon-gamma	4	3.80952	0.00416615	WNT5A, IL12RB1, CCL20, CCL5	87	68	18082	12.2258	0.962268	0.664596	6.19244
GOTERM_BP_DIRECT	GO:0008284~positive regulation of cell proliferation	9	8.57143	0.00423646	CSF3, WNT5A, S100B, SFRP1, MARCKSL1, ID4, GREM1, CLEC11A, PLAC8	87	542	18082	3.4512	0.964303	0.565331	6.29381
GOTERM_BP_DIRECT	GO:0006954~inflammatory response	7	6.66667	0.00596012	RPS6KA5, TNFRSF9, CCL20, BDKRB1, CCL5, TPSB2, NLRP3	87	344	18082	4.22928	0.990838	0.608801	8.74694
GOTERM_BP_DIRECT	GO:0071347~cellular response to interleukin-1	4	3.80952	0.00655676	LCN2, SFRP1, CCL20, CCL5	87	80	18082	10.392	0.994281	0.57712	9.582
GOTERM_BP_DIRECT	GO:0048791~calcium ion-regulated exocytosis of neurotransmitter	3	2.85714	0.00779947	SYT13, SYT7, SYT17	87	28	18082	22.2685	0.997859	0.584421	11.2984
GOTERM_BP_DIRECT	GO:0050728~negative regulation of inflammatory response	4	3.80952	0.00826024	GHRL, ACP5, NLRP3, PLA2G5	87	87	18082	9.55582	0.998513	0.556874	11.9271
GOTERM_BP_DIRECT	GO:0042327~positive regulation of phosphorylation	3	2.85714	0.00892058	TNFSF11, ANG, CCL5	87	30	18082	20.7839	0.999119	0.54231	12.8207
GOTERM_BP_DIRECT	GO:0046851~negative regulation of bone remodeling	2	1.90476	0.00948986	SFRP1, GREM1	87	2	18082	207.839	0.999439	0.52693	13.5843
GOTERM_BP_DIRECT	GO:0006955~immune response	6	5.71429	0.0096142	CSF3, TNFRSF9, CD244, TNFSF11, CCL20, CCL5	87	272	18082	4.58469	0.999491	0.498135	13.7503
GOTERM_BP_DIRECT	GO:0002376~immune system process	7	6.66667	0.00985627	LCN2, NLRC5, CD244, CFB, C2, NLRP3, PSMB8	87	383	18082	3.79863	0.99958	0.47689	14.0725
GOTERM_BP_DIRECT	GO:0045087~innate immune response	7	6.66667	0.0120241	LCN2, NLRC5, CD244, ANG, CFB, C2, NLRP3	87	400	18082	3.63718	0.999925	0.518317	16.9084
GOTERM_BP_DIRECT	GO:0007267~cell-cell signaling	4	3.80952	0.0130551	WNT5A, CCL5, GREM1, WNT2B	87	103	18082	8.07142	0.999967	0.521374	18.2262
GOTERM_BP_DIRECT	GO:0060638~mesenchymal-epithelial cell signaling	2	1.90476	0.0142014	WNT5A, WNT2B	87	3	18082	138.559	0.999987	0.52694	19.6685
GOTERM_BP_DIRECT	GO:0034112~positive regulation of homotypic cell-cell adhesion	2	1.90476	0.0142014	TNFSF11, CCL5	87	3	18082	138.559	0.999987	0.52694	19.6685
GOTERM_BP_DIRECT	GO:0046546~development of primary male sexual characteristics	2	1.90476	0.0142014	WNT5A, SFRP1	87	3	18082	138.559	0.999987	0.52694	19.6685
GOTERM_BP_DIRECT	GO:0009887~organ morphogenesis	4	3.80952	0.0151862	WNT5A, TNFSF11, GREM1, WNT2B	87	109	18082	7.62712	0.999994	0.528005	20.8885
GOTERM_BP_DIRECT	GO:0071356~cellular response to tumor necrosis factor	4	3.80952	0.0155593	LCN2, SFRP1, CCL20, CCL5	87	110	18082	7.55778	0.999995	0.515251	21.3463
GOTERM_BP_DIRECT	GO:0071222~cellular response to lipopolysaccharide	5	4.7619	0.0176384	LCN2, CSF3, WNT5A, CCL20, NLRP3	87	209	18082	4.97223	0.999999	0.5398	23.8516
GOTERM_BP_DIRECT	GO:2001206~positive regulation of osteoclast development	2	1.90476	0.0188907	TNFSF11, SLC9B2	87	4	18082	103.92	1	0.545224	25.3246
GOTERM_BP_DIRECT	GO:0030514~negative regulation of BMP signaling pathway	3	2.85714	0.0202096	WNT5A, SFRP1, GREM1	87	46	18082	13.5547	1	0.551279	26.847
GOTERM_BP_DIRECT	GO:0006508~proteolysis	8	7.61905	0.0208094	AGBL3, USP27X, CFB, C2, TPSB2, PSMA8, PSMB8, PRSS46	87	582	18082	2.85689	1	0.544373	27.5296
GOTERM_BP_DIRECT	GO:0030308~negative regulation of cell growth	4	3.80952	0.0217784	SFRP1, CDKN2D, BDKRB1, GREM1	87	125	18082	6.65085	1	0.54419	28.62
GOTERM_BP_DIRECT	GO:0021915~neural tube development	3	2.85714	0.0245189	WNT5A, SFRP1, FAM212A	87	51	18082	12.2258	1	0.571418	31.6214
GOTERM_BP_DIRECT	GO:2000052~positive regulation of non-canonical Wnt signaling pathway	2	1.90476	0.0282034	WNT5A, SFRP1	87	6	18082	69.2797	1	0.607706	35.4708
GOTERM_BP_DIRECT	GO:0030154~cell differentiation	9	8.57143	0.0319894	1700112E06RIK, WNT5A, ANGPTL6, SEMA6C, TNFSF11, SFRP1, ANG, SYT17, PSMB8	87	780	18082	2.39814	1	0.639724	39.2147
GOTERM_BP_DIRECT	GO:0002830~positive regulation of type 2 immune response	2	1.90476	0.0328269	IL33, NLRP3	87	7	18082	59.3826	1	0.634961	40.015
GOTERM_BP_DIRECT	GO:0032754~positive regulation of interleukin-5 production	2	1.90476	0.0328269	IL33, NLRP3	87	7	18082	59.3826	1	0.634961	40.015
GOTERM_BP_DIRECT	GO:0050729~positive regulation of inflammatory response	3	2.85714	0.036211	WNT5A, IL33, CCL5	87	63	18082	9.8971	1	0.657792	43.1495
GOTERM_BP_DIRECT	GO:0032736~positive regulation of interleukin-13 production	2	1.90476	0.0374286	IL33, NLRP3	87	8	18082	51.9598	1	0.656813	44.2394
GOTERM_BP_DIRECT	GO:0033689~negative regulation of osteoblast proliferation	2	1.90476	0.0374286	SFRP1, GREM1	87	8	18082	51.9598	1	0.656813	44.2394
GOTERM_BP_DIRECT	GO:0060340~positive regulation of type I interferon-mediated signaling pathway	2	1.90476	0.0465673	WNT5A, NLRC5	87	10	18082	41.5678	1	0.724956	51.8172
GOTERM_BP_DIRECT	GO:0045944~positive regulation of transcription from RNA polymerase II promoter	10	9.52381	0.0465753	CSF3, RPS6KA5, WNT5A, NLRC5, TNFSF11, ID4, IL33, GREM1, NLRP3, PLAC8	87	995	18082	2.08883	1	0.712926	51.8234

## Sheet: RNAseq-DOWN
Down-regulated gene		LOG2FC<-1	p.value<0.05
Geneid	Chr	Start	End	Strand	Length	FLS_cont6	FLS_cont7	FLS_cont10	Ave.cont	FLS_KO3	FLS_KO4	FLS_KO8	Ave.KO	log2(fold_change)	p.value	q.value	rank	estimatedDEG
Uhrf1	chr17;chr17;chr17;chr17;chr17;chr17;chr17;chr17;chr17;chr17;chr17;chr17;chr17;chr17;chr17;chr17;chr17;chr17	56303337;56304313;56305086;56309337;56310676;56312054;56312864;56313041;56315192;56315399;56315777;56317004;56317991;56318247;56320162;56320397;56322021;56322356	56303561;56304393;56305250;56309579;56310836;56312269;56312967;56313251;56315315;56315506;56315881;56317110;56318150;56318384;56320282;56320542;56322125;56323486	+;+;+;+;+;+;+;+;+;+;+;+;+;+;+;+;+;+	3651	534.123	456.814	450.39	480.442	175.172	192.678	197.68	188.51	-1.34972	5e-35	1.17e-30	1	1
Myod1	chr7;chr7;chr7	46376474;46377740;46378144	46377299;46377818;46379092	+;+;+	1854	38.9026	43.8041	43.8433	42.1833	7.91736	9.26337	6.02071	7.73382	-2.44742	2.7e-17	9.02e-14	7	1
Pecam1	chr11;chr11;chr11;chr11;chr11;chr11;chr11;chr11;chr11;chr11;chr11;chr11;chr11;chr11;chr11	106654218;106671742;106679549;106681032;106682880;106683593;106684228;106684961;106688776;106690936;106695754;106697052;106699592;106714902;106715019	106655162;106671798;106679611;106681085;106682953;106683620;106684335;106685248;106689051;106691184;106696029;106697354;106699885;106714928;106715281	-;-;-;-;-;-;-;-;-;-;-;-;-;-;-	3305	328.044	338.96	269.038	312.014	123.709	142.656	176.608	147.657	-1.07936	1.99e-15	3.58e-12	13	1
Ptprb	chr10;chr10;chr10;chr10;chr10;chr10;chr10;chr10;chr10;chr10;chr10;chr10;chr10;chr10;chr10;chr10;chr10;chr10;chr10;chr10;chr10;chr10;chr10;chr10;chr10;chr10;chr10;chr10;chr10;chr10;chr10;chr10	116301374;116302108;116313814;116315042;116317366;116319333;116322425;116327950;116331209;116338616;116339418;116340891;116341380;116343793;116346799;116347927;116349966;116350766;116353791;116357192;116361208;116362344;116362524;116362644;116363279;116363975;116367481;116368693;116369296;116372841;116380832;116383853	116301679;116302381;116314092;116315299;116317629;116319602;116322685;116328216;116331472;116338879;116339681;116341154;116341649;116344056;116347062;116348208;116350244;116350915;116354034;116357298;116361307;116362427;116362541;116362725;116363369;116364051;116367615;116368815;116369459;116372976;116380952;116389538	+;+;+;+;+;+;+;+;+;+;+;+;+;+;+;+;+;+;+;+;+;+;+;+;+;+;+;+;+;+;+;+	11912	199.77	177.302	138.505	171.859	68.2872	73.1807	99.3417	80.2699	-1.0983	6.93e-11	5.6e-08	29	1
Erg	chr16;chr16;chr16;chr16;chr16;chr16;chr16;chr16;chr16;chr16;chr16	95360204;95368652;95369322;95369995;95377301;95379112;95380068;95389894;95409735;95524527;95530264	95361326;95368699;95369378;95370063;95377372;95379192;95380271;95390045;95409952;95524614;95530365	-;-;-;-;-;-;-;-;-;-;-	2214	65.1882	56.3195	55.8005	59.1027	26.7211	27.7901	26.0897	26.867	-1.13739	1.19e-08	6.5e-06	43	1
Eltd1	chr3;chr3;chr3;chr3;chr3;chr3;chr3;chr3;chr3;chr3;chr3;chr3;chr3;chr3;chr3;chr3	151437882;151439238;151492277;151497827;151498350;151500046;151500329;151501725;151507349;151509203;151510586;151517397;151517741;151540961;151542681;151543234	151438004;151439387;151492426;151497976;151498420;151500225;151500512;151501841;151507551;151509379;151510789;151517617;151517807;151541052;151542849;151545081	+;+;+;+;+;+;+;+;+;+;+;+;+;+;+;+	4106	138.788	159.572	82.7043	127.021	49.4835	50.9486	59.2037	53.2119	-1.25525	1.26e-08	6.56e-06	45	1
Arap3	chr18;chr18;chr18;chr18;chr18;chr18;chr18;chr18;chr18;chr18;chr18;chr18;chr18;chr18;chr18;chr18;chr18;chr18;chr18;chr18;chr18;chr18;chr18;chr18;chr18;chr18;chr18;chr18;chr18;chr18;chr18;chr18;chr18;chr18	37972623;37974102;37974365;37974618;37975387;37975516;37975823;37976040;37978348;37978545;37979832;37980182;37981309;37981961;37984234;37984589;37985313;37987555;37987754;37988315;37989059;37989363;37989686;37989876;37990512;37990702;37990968;37991328;37991539;37996209;37996419;37996586;37997533;37998696	37973651;37974140;37974502;37974681;37975422;37975598;37975956;37976168;37978462;37978619;37979900;37980329;37981414;37982173;37984397;37984652;37985532;37987657;37987901;37988428;37989194;37989545;37989771;37990075;37990618;37990886;37991088;37991397;37991730;37996320;37996480;37997123;37997574;37998969	-;-;-;-;-;-;-;-;-;-;-;-;-;-;-;-;-;-;-;-;-;-;-;-;-;-;-;-;-;-;-;-;-;-	5499	84.1138	93.8659	55.8005	77.9267	35.6281	39.8325	37.1277	37.5295	-1.0541	7.65e-07	0.00020129	89	1
Scn5a	chr9;chr9;chr9;chr9;chr9;chr9;chr9;chr9;chr9;chr9;chr9;chr9;chr9;chr9;chr9;chr9;chr9;chr9;chr9;chr9;chr9;chr9;chr9;chr9;chr9;chr9;chr9;chr9;chr9	119483408;119489749;119491461;119492049;119493061;119495507;119498081;119501622;119512141;119512981;119515903;119517348;119521014;119522478;119528912;119529957;119533663;119534555;119535813;119536440;119537622;119539524;119543099;119543324;119550606;119551986;119560262;119562352;119578849	119486818;119490019;119491565;119492186;119493114;119495788;119498203;119501795;119512295;119513101;119516064;119517791;119521370;119522651;119529150;119530089;119534034;119534734;119536010;119536581;119537685;119539754;119543190;119543415;119550734;119552075;119560380;119562678;119579016	-;-;-;-;-;-;-;-;-;-;-;-;-;-;-;-;-;-;-;-;-;-;-;-;-;-;-;-;-	8547	15.7713	17.7302	16.9394	16.8137	1.97934	2.77901	6.02071	3.59302	-2.22637	7.98e-07	0.000205375	91	1
Cxcr4	chr1;chr1	128588199;128592189	128589901;128592299	-;-	1814	65.1882	89.6941	47.829	67.5704	30.6798	26.8638	33.1139	30.2192	-1.16093	1.88e-06	0.000403415	109	1
Dll4	chr2;chr2;chr2;chr2;chr2;chr2;chr2;chr2;chr2;chr2;chr2	119325784;119326315;119327063;119327929;119328532;119328682;119330616;119330962;119332143;119334048;119334628	119326206;119326587;119327120;119328192;119328592;119328812;119330785;119331181;119332845;119334156;119335666	+;+;+;+;+;+;+;+;+;+;+	3451	39.9541	47.9759	32.8824	40.2708	17.8141	19.4531	17.0587	18.1086	-1.15306	4.51e-06	0.000825518	128	1
Dyrk3	chr1;chr1;chr1	131128441;131136260;131138080	131130245;131136371;131138234	-;-;-	2072	29.4398	42.7611	37.8646	36.6885	20.7831	16.6741	15.0518	17.503	-1.06773	3.05e-05	0.00399253	179	1
Sox10	chr15;chr15;chr15;chr15	79154913;79159135;79163289;79164282	79156641;79159403;79163794;79164490	-;-;-;-	2713	44.1597	31.2886	31.886	35.7781	20.7831	11.116	18.0621	16.6538	-1.10323	6.08e-05	0.00649799	218	1
Cldn5	chr16	18776847	18778262	+	1416	36.7998	55.2766	27.9003	39.9922	21.7727	13.8951	17.0587	17.5755	-1.18615	7.19e-05	0.00735167	228	1
Lgi4	chr7;chr7;chr7;chr7;chr7;chr7;chr7;chr7;chr7	31059935;31060551;31061078;31063104;31063285;31063560;31067095;31067343;31068877	31060190;31060622;31061149;31063175;31063356;31063729;31067259;31067848;31070935	+;+;+;+;+;+;+;+;+	3444	25.2341	37.5464	16.9394	26.5733	13.8554	6.48436	8.02762	9.45579	-1.49071	7.45e-05	0.00758729	230	1
Nos3	chr5;chr5;chr5;chr5;chr5;chr5;chr5;chr5;chr5;chr5;chr5;chr5;chr5;chr5;chr5;chr5;chr5;chr5;chr5;chr5;chr5;chr5;chr5;chr5;chr5;chr5	24364819;24366760;24367198;24367481;24368819;24368990;24369798;24370021;24370788;24371605;24371902;24372127;24372634;24377281;24377593;24377811;24379709;24379949;24380173;24380870;24381364;24381654;24382525;24383260;24383530;24383818	24365001;24366862;24367346;24367643;24368910;24369131;24369937;24370195;24370889;24371799;24371975;24372271;24372738;24377348;24377709;24377985;24379841;24380027;24380360;24381042;24381574;24381741;24382646;24383408;24383724;24384474	+;+;+;+;+;+;+;+;+;+;+;+;+;+;+;+;+;+;+;+;+;+;+;+;+;+	4123	30.4913	44.847	26.9038	34.0807	17.8141	13.8951	16.0552	15.9215	-1.09798	8.52e-05	0.00838446	238	1
Col13a1	chr10;chr10;chr10;chr10;chr10;chr10;chr10;chr10;chr10;chr10;chr10;chr10;chr10;chr10;chr10;chr10;chr10;chr10;chr10;chr10;chr10;chr10;chr10;chr10;chr10;chr10;chr10;chr10;chr10;chr10;chr10;chr10;chr10;chr10;chr10;chr10;chr10;chr10;chr10;chr10;chr10	61838498;61840078;61843568;61849176;61850157;61851112;61856338;61856782;61857588;61860440;61862015;61862628;61863044;61863941;61866391;61867452;61867831;61869524;61870161;61871290;61873994;61874738;61876268;61884676;61885688;61887249;61890079;61891208;61892956;61893915;61894034;61895334;61896346;61897139;61903090;61905254;61908682;61911707;61920089;61961289;61978349	61838708;61840116;61843654;61849211;61850210;61851165;61856418;61856808;61857629;61860484;61862113;61862771;61863088;61864003;61866414;61867520;61867875;61869577;61870247;61871334;61874020;61874770;61876312;61884711;61885714;61887356;61890144;61891264;61892982;61893941;61894060;61895360;61896372;61897174;61903140;61905280;61908717;61911733;61920096;61961358;61979108	-;-;-;-;-;-;-;-;-;-;-;-;-;-;-;-;-;-;-;-;-;-;-;-;-;-;-;-;-;-;-;-;-;-;-;-;-;-;-;-;-	2900	27.337	42.7611	26.9038	32.334	12.8657	18.5267	13.0449	14.8124	-1.12624	0.000109777	0.0102023	252	1
Nptx1	chr11;chr11;chr11;chr11;chr11	119538719;119543182;119544592;119546652;119547146	119542694;119543361;119544836;119546859;119547820	-;-;-;-;-	5284	60.9825	117.854	44.8397	74.5587	26.7211	21.3058	43.1484	30.3918	-1.2947	0.000173651	0.0142199	286	1
Prdm16	chr4;chr4;chr4;chr4;chr4;chr4;chr4;chr4;chr4;chr4;chr4;chr4;chr4;chr4;chr4;chr4;chr4	154316125;154322271;154323247;154328260;154328664;154334375;154335093;154337643;154340721;154345322;154345995;154347924;154355247;154367178;154476639;154528582;154636723	154320922;154322445;154323480;154328434;154328833;154334452;154335262;154337727;154342137;154345475;154346142;154348134;154355349;154367315;154476689;154528931;154636873	-;-;-;-;-;-;-;-;-;-;-;-;-;-;-;-;-	8608	33.6455	30.2457	20.9252	28.2721	13.8554	11.116	14.0483	13.0066	-1.12014	0.000213903	0.0169244	296	1
Lace1	chr10;chr10;chr10;chr10;chr10;chr10;chr10;chr10;chr10;chr10;chr10;chr10;chr10	42312585;42316350;42318592;42339825;42340182;42360165;42400341;42415549;42425178;42426486;42438354;42454307;42478263	42313616;42316463;42318732;42339925;42340252;42360247;42400399;42415648;42425308;42426587;42438405;42454530;42478565	-;-;-;-;-;-;-;-;-;-;-;-;-	2513	32.5941	23.988	42.8468	33.143	11.876	18.5267	17.0587	15.8205	-1.06691	0.000247935	0.0190187	305	1
Apba2	chr7;chr7;chr7;chr7;chr7;chr7;chr7;chr7;chr7;chr7;chr7;chr7;chr7;chr7;chr7	64501706;64553647;64635031;64695024;64714431;64715511;64733513;64734655;64736881;64739699;64743260;64744416;64745698;64750103;64753071	64501818;64553771;64635084;64696017;64714511;64715547;64733658;64734690;64736967;64739884;64743439;64744628;64745817;64750243;64753876	+;+;+;+;+;+;+;+;+;+;+;+;+;+;+	3319	19.977	11.4725	10.9608	14.1368	2.96901	3.70535	6.02071	4.23169	-1.74015	0.000286329	0.0213561	314	1
Slc40a1	chr1;chr1;chr1;chr1;chr1;chr1;chr1;chr1	45908070;45910892;45912236;45918309;45918885;45921156;45924717;45925221	45909719;45911530;45912481;45918435;45919000;45921315;45924784;45925594	-;-;-;-;-;-;-;-	3380	22.0799	26.0739	15.943	21.3656	6.92769	11.116	9.03107	9.02494	-1.2433	0.000319596	0.0230306	325	1
Vsig4	chrX;chrX;chrX;chrX;chrX;chrX;chrX	96247203;96248214;96249875;96269055;96269556;96290490;96293314	96247890;96248235;96249979;96269132;96269612;96290846;96293438	-;-;-;-;-;-;-	1432	9.4628	11.4725	21.9216	14.2856	4.94835	3.70535	5.01726	4.55699	-1.64841	0.000333767	0.0236342	330	1
Jak3	chr8;chr8;chr8;chr8;chr8;chr8;chr8;chr8;chr8;chr8;chr8;chr8;chr8;chr8;chr8;chr8;chr8;chr8;chr8;chr8;chr8;chr8;chr8;chr8;chr8	71676383;71678329;71678677;71678978;71679202;71679559;71680435;71680640;71680883;71681501;71682063;71682282;71682900;71683332;71683953;71684217;71684484;71685166;71685385;71685749;71685953;71686855;71687239;71688040;71690172	71676583;71678521;71678800;71679089;71679347;71679844;71680557;71680797;71680994;71681687;71682187;71682413;71682984;71683459;71684085;71684368;71684634;71685305;71685574;71685873;71686125;71686972;71687349;71688313;71690577	+;+;+;+;+;+;+;+;+;+;+;+;+;+;+;+;+;+;+;+;+;+;+;+;+	4085	34.6969	22.945	25.9074	27.8498	12.8657	16.6741	11.038	13.5259	-1.04194	0.000407893	0.0274739	347	1
Gpr30	chr5;chr5;chr5	139423179;139423661;139425680	139423354;139423872;139427800	+;+;+	2509	8.41138	18.7732	13.9501	13.7116	4.94835	3.70535	5.01726	4.55699	-1.58924	0.000408238	0.0274739	348	1
Cdh15	chr8;chr8;chr8;chr8;chr8;chr8;chr8;chr8;chr8;chr8;chr8;chr8;chr8;chr8	122848374;122856502;122857360;122859238;122860838;122861457;122861978;122863305;122864243;122864499;122864990;122865328;122865598;122866823	122848529;122856657;122857515;122859382;122860998;122861585;122862163;122863558;122864385;122864738;122865229;122865464;122865762;122867397	+;+;+;+;+;+;+;+;+;+;+;+;+;+	2843	5.25711	5.21477	4.98219	5.15136	0	0.926337	0	0.308779	-4.06031	0.000561665	0.0357451	368	1
Adamts8	chr9;chr9;chr9;chr9;chr9;chr9;chr9;chr9;chr9	30942563;30951266;30952595;30953356;30954467;30956496;30958914;30959202;30961648	30943601;30951505;30952730;30953523;30954771;30956679;30959086;30959377;30962858	+;+;+;+;+;+;+;+;+	3632	49.4169	32.3316	55.8005	45.8497	10.8864	29.6428	28.0967	22.8753	-1.00312	0.00103373	0.0565065	428	0
Cnnm1	chr19;chr19;chr19;chr19;chr19;chr19;chr19;chr19;chr19;chr19;chr19	43440436;43465121;43468241;43469609;43471849;43472377;43484845;43491421;43491764;43493710;43494959	43442017;43465264;43468381;43469778;43471948;43472424;43485008;43491604;43491913;43493811;43497213	+;+;+;+;+;+;+;+;+;+;+	5040	5.25711	5.21477	11.9573	7.47638	0	0.926337	3.01036	1.31223	-2.51032	0.00103507	0.0565065	429	0
Gpr4	chr7;chr7	19212538;19221390	19212634;19224176	+;+	2884	22.0799	17.7302	10.9608	16.9236	8.90703	4.63169	7.02416	6.85429	-1.30396	0.00111662	0.0598427	437	0
Stc2	chr11;chr11;chr11;chr11	31359441;31365332;31367726;31369712	31360528;31365543;31367868;31370061	-;-;-;-	1793	18.9256	22.945	18.9323	20.2676	9.8967	6.48436	12.0414	9.47416	-1.09711	0.00125971	0.0661489	446	0
Igflr1	chr7;chr7;chr7;chr7;chr7	30565427;30566164;30566749;30567143;30567581	30565466;30566381;30566936;30567500;30567962	+;+;+;+;+	1186	8.41138	11.4725	9.96438	9.94942	4.94835	0.926337	3.01036	2.96168	-1.7482	0.00137073	0.0704003	456	0
Htr2b	chr1;chr1;chr1;chr1	86099037;86102422;86110534;86111879	86100232;86102622;86111116;86111970	-;-;-;-	2072	15.7713	21.902	8.96794	15.5471	1.97934	8.33704	7.02416	5.78018	-1.42746	0.00185149	0.0879552	493	0
Bmf	chr2;chr2;chr2;chr2;chr2	118528757;118545082;118546716;118549041;118549540	118532659;118545245;118547012;118549170;118549678	-;-;-;-;-	4633	11.5656	13.5584	11.9573	12.3604	4.94835	5.55802	4.01381	4.84006	-1.35263	0.00205765	0.0950495	507	0
Mall	chr2;chr2;chr2;chr2	127704390;127708837;127712269;127729756	127705923;127708959;127712436;127729897	-;-;-;-	1967	18.9256	20.8591	5.97863	15.2544	6.92769	4.63169	5.01726	5.52555	-1.46504	0.00234155	0.103666	529	0
Filip1	chr9;chr9;chr9;chr9;chr9;chr9	79815562;79817898;79853622;79860080;79898195;79977456	79815897;79820706;79853800;79860253;79898476;79977882	-;-;-;-;-;-	4207	22.0799	11.4725	15.943	16.4985	9.8967	4.63169	7.02416	7.18418	-1.19943	0.00241816	0.105485	536	0
Gm12942	chr4;chr4;chr4	127126046;127127819;127128854	127126193;127127999;127129644	+;+;+	1120	6.30854	5.21477	12.9537	8.159	1.97934	0.926337	3.01036	1.97201	-2.04872	0.00250428	0.108612	540	0
Hid1	chr11;chr11;chr11;chr11;chr11;chr11;chr11;chr11;chr11;chr11;chr11;chr11;chr11;chr11;chr11;chr11;chr11;chr11;chr11	115347709;115348800;115349086;115349922;115350492;115350919;115352585;115354400;115354586;115355025;115355294;115356365;115356620;115358670;115358977;115359695;115360322;115361639;115367544	115348532;115348958;115349177;115350002;115350598;115351146;115352749;115354478;115354737;115355115;115355434;115356421;115356842;115358786;115359083;115359811;115360492;115361788;115367719	-;-;-;-;-;-;-;-;-;-;-;-;-;-;-;-;-;-;-	3237	17.8742	18.7732	19.9288	18.8587	7.91736	7.4107	12.0414	9.12316	-1.04762	0.002523	0.109221	541	0
8430408G22Rik	chr6;chr6	116650684;116651693	116650845;116652847	+;+	1317	8.41138	9.38659	7.9715	8.58982	2.96901	2.77901	2.0069	2.58498	-1.73248	0.00324949	0.130537	583	0
Ociad2	chr5;chr5;chr5;chr5;chr5;chr5;chr5	73322199;73326281;73327663;73329267;73332104;73335820;73338531	73323847;73326398;73327710;73329320;73332200;73335945;73338639	-;-;-;-;-;-;-	2201	9.4628	16.6873	18.9323	15.0275	5.93802	6.48436	8.02762	6.81667	-1.14046	0.00437917	0.161767	634	0
Rsad2	chr12;chr12;chr12;chr12;chr12;chr12	26442743;26447152;26448583;26450546;26454018;26456071	26445570;26447184;26448732;26450775;26454179;26456452	-;-;-;-;-;-	3785	7.35996	9.38659	4.98219	7.24291	1.97934	2.77901	1.00345	1.9206	-1.91501	0.00447702	0.164861	636	0
Kcnq4	chr4;chr4;chr4;chr4;chr4;chr4;chr4;chr4;chr4;chr4;chr4;chr4;chr4;chr4	120697473;120698499;120699892;120702386;120704355;120711223;120713012;120714985;120715251;120715766;120716552;120716925;120717458;120746860	120698106;120698628;120700023;120702485;120704575;120711384;120713100;120715080;120715361;120715891;120716727;120717051;120717548;120747176	-;-;-;-;-;-;-;-;-;-;-;-;-;-	2512	6.30854	7.30068	6.97506	6.86143	0	2.77901	2.0069	1.59531	-2.10468	0.00457728	0.1675	640	0
Bcam	chr7;chr7;chr7;chr7;chr7;chr7;chr7;chr7;chr7;chr7;chr7;chr7;chr7;chr7;chr7	19756138;19756708;19758424;19758659;19758960;19760047;19760294;19764040;19764653;19765334;19765613;19766689;19766836;19768452;19770407	19756619;19756825;19758568;19758803;19759096;19760188;19760412;19764196;19764789;19765516;19765709;19766759;19767061;19768573;19770532	-;-;-;-;-;-;-;-;-;-;-;-;-;-;-	2407	14.7199	15.6443	10.9608	13.775	5.93802	5.55802	7.02416	6.1734	-1.15792	0.00466121	0.169373	644	0
H2-Eb1	chr17;chr17;chr17;chr17;chr17;chr17	34305867;34309591;34314170;34315043;34315556;34315874	34306047;34309860;34314451;34315153;34315579;34316674	+;+;+;+;+;+	1669	5.25711	5.21477	9.96438	6.81209	2.96901	0.926337	1.00345	1.63293	-2.06063	0.00518817	0.182443	666	0
Mfng	chr15;chr15;chr15;chr15;chr15;chr15;chr15;chr15	78755883;78757297;78759193;78760806;78764315;78766818;78767142;78773018	78756644;78757382;78759358;78760891;78764468;78766920;78767190;78773445	-;-;-;-;-;-;-;-	1834	22.0799	18.7732	11.9573	17.6034	5.93802	8.33704	11.038	8.43768	-1.06094	0.00524154	0.183768	668	0
Dcp1b	chr6;chr6;chr6;chr6;chr6;chr6;chr6;chr6;chr6	119175253;119180065;119183650;119198928;119200822;119206470;119214770;119217803;119220003	119175442;119180105;119183777;119198994;119200951;119206598;119215606;119217979;119221614	+;+;+;+;+;+;+;+;+	3311	12.6171	22.945	24.9109	20.1577	8.90703	12.9687	8.02762	9.96779	-1.01598	0.00535785	0.187146	670	0
Cyp4f17	chr17;chr17;chr17;chr17;chr17;chr17;chr17;chr17;chr17;chr17;chr17;chr17;chr17	32506462;32506894;32517894;32520363;32520503;32522118;32524002;32524579;32524835;32527841;32528047;32528276;32528717	32506578;32507092;32518038;32520416;32520630;32522239;32524272;32524645;32524964;32527974;32528111;32528358;32528894	+;+;+;+;+;+;+;+;+;+;+;+;+	1693	10.5142	17.7302	12.9537	13.7327	3.95868	7.4107	7.02416	6.13118	-1.16338	0.00543266	0.189335	672	0
Tmem117	chr15;chr15;chr15;chr15;chr15;chr15;chr15;chr15	94629185;94638061;94714862;94879381;94931796;95011316;95074404;95094359	94629302;94638363;94714994;94879480;94931893;95011475;95074533;95096097	+;+;+;+;+;+;+;+	2781	11.5656	8.34364	14.9466	11.6186	2.96901	3.70535	7.02416	4.56617	-1.34738	0.00544241	0.189393	673	0
Gja5	chr3;chr3;chr3	97032402;97037722;97050596	97032485;97037778;97053634	+;+;+	3180	16.8228	9.38659	11.9573	12.7222	4.94835	3.70535	8.02762	5.56044	-1.19408	0.00567894	0.195302	681	0
Tmem141	chr2;chr2;chr2;chr2	25620066;25621066;25621375;25621608	25620530;25621173;25621458;25622005	-;-;-;-	1055	13.6685	8.34364	17.9359	13.316	3.95868	5.55802	8.02762	5.84811	-1.18712	0.00571489	0.195963	683	0
Acer2	chr4;chr4;chr4;chr4;chr4;chr4	86874414;86886158;86887024;86900482;86911616;86917394	86874596;86886272;86887165;86900619;86911753;86920881	+;+;+;+;+;+	4204	11.5656	12.5155	5.97863	10.0199	4.94835	1.85267	4.01381	3.60494	-1.47482	0.00623501	0.208011	702	0
Rilp	chr11;chr11;chr11;chr11;chr11;chr11;chr11;chr11	75510094;75510444;75510632;75510822;75511289;75511780;75512351;75512699	75510372;75510537;75510738;75511007;75511434;75511902;75512434;75513166	+;+;+;+;+;+;+;+	1487	10.5142	14.6014	16.9394	14.0183	2.96901	7.4107	9.03107	6.47026	-1.11542	0.00679615	0.219237	726	0
Dnahc10	chr5;chr5;chr5;chr5;chr5;chr5;chr5;chr5;chr5;chr5;chr5;chr5;chr5;chr5;chr5;chr5;chr5;chr5;chr5;chr5;chr5;chr5;chr5;chr5;chr5;chr5;chr5;chr5;chr5;chr5;chr5;chr5;chr5;chr5;chr5;chr5;chr5;chr5;chr5;chr5;chr5;chr5;chr5;chr5;chr5;chr5;chr5;chr5;chr5;chr5;chr5;chr5;chr5;chr5;chr5;chr5;chr5;chr5;chr5;chr5;chr5;chr5;chr5;chr5;chr5;chr5;chr5;chr5;chr5;chr5;chr5;chr5;chr5;chr5;chr5;chr5;chr5;chr5;chr5	124725085;124726828;124729063;124730052;124731391;124732294;124734447;124736803;124741888;124743531;124746543;124747603;124748391;124750761;124753168;124754207;124755654;124758247;124760017;124760888;124762127;124762748;124763036;124764788;124765504;124768796;124770434;124773030;124773373;124773740;124774976;124775345;124777159;124777817;124779084;124782268;124783828;124785148;124787317;124789762…	124725380;124726908;124729163;124730160;124731506;124732516;124734604;124737033;124742078;124743729;124746737;124747773;124748567;124750886;124753340;124754358;124755818;124758454;124760173;124761364;124762285;124762864;124763138;124764966;124765715;124768949;124770667;124773152;124773606;124773963;124775245;124775528;124777293;124777969;124779272;124782414;124784019;124785266;124787475;124789897…	+;+;+;+;+;+;+;+;+;+;+;+;+;+;+;+;+;+;+;+;+;+;+;+;+;+;+;+;+;+;+;+;+;+;+;+;+;+;+;+;+;+;+;+;+;+;+;+;+;+;+;+;+;+;+;+;+;+;+;+;+;+;+;+;+;+;+;+;+;+;+;+;+;+;+;+;+;+;+	14038	2.10285	4.17182	4.98219	3.75228	0.98967	0	0	0.32989	-3.50771	0.00689934	0.221302	730	0
Mtfp1	chr11;chr11;chr11;chr11	4091481;4093801;4094389;4095216	4092299;4094033;4094516;4095431	-;-;-;-	1396	6.30854	12.5155	17.9359	12.2533	6.92769	4.63169	4.01381	5.19106	-1.23907	0.00711021	0.225333	739	0
St8sia4	chr1;chr1;chr1;chr1;chr1	95587682;95627243;95653513;95660864;95667149	95591964;95627800;95653770;95660995;95667594	-;-;-;-;-	5677	11.5656	14.6014	11.9573	12.7081	4.94835	6.48436	6.02071	5.81781	-1.1272	0.00741497	0.232475	747	0
Blnk	chr19;chr19;chr19;chr19;chr19;chr19;chr19;chr19;chr19;chr19;chr19;chr19;chr19;chr19;chr19;chr19;chr19	40928927;40934427;40936273;40937651;40939367;40940172;40943302;40944127;40945487;40950954;40952351;40959699;40962345;40964243;40968499;40972586;40994012	40929292;40934582;40936356;40937727;40939398;40940256;40943344;40944154;40945556;40951025;40952432;40959862;40962501;40964283;40968548;40972651;40994535	-;-;-;-;-;-;-;-;-;-;-;-;-;-;-;-;-	2097	6.30854	9.38659	14.9466	10.2139	3.95868	5.55802	3.01036	4.17569	-1.29045	0.00837642	0.251507	780	0
C1qtnf9	chr14;chr14;chr14;chr14	60768134;60772276;60777025;60779252	60768168;60772462;60777087;60780869	+;+;+;+	1903	3.15427	9.38659	1.99288	4.84458	0	0	2.0069	0.668968	-2.85636	0.0084034	0.251672	782	0
Smagp	chr15;chr15;chr15;chr15	100621340;100622629;100636187;100636559	100622026;100622709;100636255;100636865	-;-;-;-	1144	7.35996	2.08591	5.97863	5.1415	0	2.77901	0	0.926337	-2.47258	0.0101405	0.289623	820	0
Efhd1	chr1;chr1;chr1;chr1	87264364;87289468;87297629;87309661	87264754;87289615;87297763;87310791	+;+;+;+	1805	7.35996	15.6443	6.97506	9.99311	0	6.48436	5.01726	3.83387	-1.38213	0.0121342	0.327024	869	0
Oacyl	chr18;chr18;chr18;chr18;chr18;chr18;chr18;chr18;chr18;chr18;chr18;chr18;chr18;chr18;chr18	65698268;65707308;65710522;65720192;65722490;65725330;65726278;65731395;65737839;65740076;65742202;65745238;65747719;65749625;65750065	65698441;65707447;65710600;65720330;65722707;65725509;65726380;65731496;65738004;65740155;65742315;65745370;65747905;65749767;65751537	+;+;+;+;+;+;+;+;+;+;+;+;+;+;+	3431	9.4628	9.38659	6.97506	8.60815	1.97934	3.70535	4.01381	3.23283	-1.4129	0.0127125	0.336233	883	0
Kcnc3	chr7;chr7;chr7;chr7	44590886;44595161;44598384;44601869	44591758;44596268;44598575;44604751	+;+;+;+	5056	5.25711	2.08591	2.98931	3.44411	0	0	1.00345	0.334484	-3.36412	0.0127146	0.336233	884	0
Bik	chr15;chr15;chr15;chr15;chr15	83526862;83541295;83543065;83543580;83544133	83526936;83541442;83543163;83543697;83544635	+;+;+;+;+	943	7.35996	3.12886	3.98575	4.82486	1.97934	0	1.00345	0.994264	-2.27879	0.014748	0.363683	949	0
Lenep	chr3;chr3	89401896;89402400	89402312;89402650	-;-	668	10.5142	11.4725	2.98931	8.32535	3.95868	2.77901	2.0069	2.91487	-1.51408	0.015314	0.370829	966	0
Susd5	chr9;chr9;chr9;chr9;chr9	114057354;114063956;114068757;114082421;114095637	114057644;114064133;114068875;114082609;114098733	+;+;+;+;+	3874	9.4628	10.4295	15.943	11.9451	4.94835	2.77901	9.03107	5.58614	-1.0965	0.0186975	0.417644	1048	0
5730508B09Rik	chr3;chr3	127869688;127896034	127871000;127896323	-;-	1603	5.25711	4.17182	7.9715	5.80014	0	2.77901	2.0069	1.59531	-1.86226	0.0192274	0.424114	1060	0
2810047C21Rik1	chr7;chr7;chr7;chr7;chr7;chr7	8086047;8088142;8088989;8090261;8092260;8092761	8086971;8088228;8089114;8090299;8092449;8093037	-;-;-;-;-;-	1644	4.20569	5.21477	5.97863	5.13303	0	1.85267	2.0069	1.28653	-1.99633	0.0206317	0.440468	1097	0
Nova2	chr7;chr7;chr7;chr7	18925888;18942216;18950453;18957536	18926164;18942359;18950619;18965319	+;+;+;+	8372	7.35996	9.38659	5.97863	7.57506	2.96901	1.85267	4.01381	2.94516	-1.36291	0.0223619	0.460515	1136	0
Ppargc1a	chr5;chr5;chr5;chr5;chr5;chr5;chr5;chr5;chr5;chr5;chr5;chr5;chr5	51454249;51462706;51463206;51472598;51472879;51473496;51490017;51490200;51494601;51495670;51498034;51548512;51553735	51458283;51462857;51463327;51472718;51472983;51474411;51490121;51490245;51494805;51495795;51498228;51548691;51553921	-;-;-;-;-;-;-;-;-;-;-;-;-	6495	2.10285	3.12886	3.98575	3.07249	0.98967	0	0	0.32989	-3.21935	0.0223643	0.460515	1137	0
Zfp286	chr11;chr11;chr11;chr11;chr11;chr11	62778387;62783672;62784879;62787959;62788930;62789376	62780899;62783761;62784993;62788044;62789089;62789417	-;-;-;-;-;-	3006	12.6171	15.6443	5.97863	11.4133	4.94835	6.48436	5.01726	5.48332	-1.0576	0.0228729	0.464255	1153	0
Slc26a1	chr5;chr5;chr5	108670545;108673431;108675239	108672740;108674048;108675649	-;-;-	3225	3.15427	1.04295	4.98219	3.0598	0.98967	0	0	0.32989	-3.21338	0.0238632	0.475235	1176	0
Plxnb3	chrX;chrX;chrX;chrX;chrX;chrX;chrX;chrX;chrX;chrX;chrX;chrX;chrX;chrX;chrX;chrX;chrX;chrX;chrX;chrX;chrX;chrX;chrX;chrX;chrX;chrX;chrX;chrX;chrX;chrX;chrX;chrX;chrX;chrX;chrX	73757103;73758523;73759894;73760895;73761106;73762167;73762471;73762716;73762908;73763152;73763360;73763783;73763978;73764362;73765267;73766005;73766359;73766637;73766941;73767291;73767521;73767781;73767958;73768340;73768690;73769134;73769602;73769790;73770256;73770579;73771095;73771411;73771543;73771746;73772146	73757150;73759583;73760073;73761023;73761206;73762296;73762627;73762824;73763022;73763277;73763476;73763876;73764147;73764513;73765372;73766135;73766535;73766832;73767180;73767452;73767672;73767881;73768181;73768518;73768756;73769461;73769705;73769886;73770434;73770739;73771242;73771475;73771618;73771820;73772510	+;+;+;+;+;+;+;+;+;+;+;+;+;+;+;+;+;+;+;+;+;+;+;+;+;+;+;+;+;+;+;+;+;+;+	6022	9.4628	14.6014	7.9715	10.6786	6.92769	5.55802	3.01036	5.16536	-1.04778	0.0239761	0.475865	1180	0
Psd2	chr18;chr18;chr18;chr18;chr18;chr18;chr18;chr18;chr18;chr18;chr18;chr18;chr18;chr18;chr18	35964835;35978284;35979616;35980289;35984343;35987188;35988180;36002924;36004707;36005719;36006077;36006561;36007481;36010605;36012639	35965219;35978685;35980065;35980483;35984423;35987300;35988238;36003013;36004750;36005909;36006147;36006718;36007625;36010748;36014716	+;+;+;+;+;+;+;+;+;+;+;+;+;+;+	4606	5.25711	1.04295	2.98931	3.09646	0	0.926337	0	0.308779	-3.32597	0.0241438	0.477977	1183	0
Ppapdc3	chr2;chr2	32095651;32109609	32096262;32110820	+;+	1824	10.5142	14.6014	6.97506	10.6969	7.91736	4.63169	3.01036	5.18647	-1.04437	0.0260344	0.50065	1217	0
Morn4	chr19;chr19;chr19;chr19;chr19	42074939;42076455;42077965;42078484;42086197	42076255;42076564;42078079;42078583;42086370	-;-;-;-;-	1816	2.10285	9.38659	8.96794	6.81912	1.97934	2.77901	2.0069	2.25509	-1.5964	0.0267485	0.50807	1233	0
Adamtsl2	chr2;chr2;chr2;chr2;chr2;chr2;chr2;chr2;chr2;chr2;chr2;chr2;chr2;chr2;chr2;chr2;chr2;chr2;chr2	27079381;27081704;27082382;27083200;27083996;27084777;27085051;27087211;27089584;27093533;27095403;27098606;27101607;27102769;27103066;27103868;27104749;27107395;27108321	27079573;27081794;27082524;27083275;27084098;27084922;27085174;27087291;27089759;27093890;27095772;27098703;27101733;27102982;27103221;27104038;27104925;27107539;27108613	+;+;+;+;+;+;+;+;+;+;+;+;+;+;+;+;+;+;+	3242	8.41138	11.4725	5.97863	8.62083	5.93802	0	5.01726	3.65176	-1.23924	0.0282007	0.525845	1256	0
Cd300ld	chr11;chr11;chr11;chr11	114982446;114986095;114987303;114989771	114984297;114986221;114987644;114989886	-;-;-;-	2437	7.35996	8.34364	13.9501	9.88457	4.94835	2.77901	6.02071	4.58269	-1.10898	0.0287078	0.53086	1266	0
Stap2	chr17;chr17;chr17;chr17;chr17;chr17;chr17;chr17;chr17;chr17;chr17;chr17;chr17	55997078;55997460;55997605;55997778;55999743;55999913;56000087;56000480;56000901;56002012;56002853;56003130;56005430	55997361;55997534;55997697;55997951;55999808;56000015;56000156;56000614;56001001;56002068;56002975;56003201;56005568	-;-;-;-;-;-;-;-;-;-;-;-;-	1492	7.35996	9.38659	9.96438	8.90364	0.98967	3.70535	7.02416	3.90639	-1.18856	0.028719	0.53086	1267	0
Mansc1	chr6;chr6;chr6;chr6	134609207;134617317;134621733;134632216	134610851;134617457;134622049;134632488	-;-;-;-	2376	3.15427	5.21477	5.97863	4.78256	0.98967	1.85267	1.00345	1.28193	-1.89946	0.0328594	0.565443	1361	0
Gpihbp1	chr15;chr15;chr15;chr15	75596658;75597031;75597513;75597730	75596730;75597153;75597629;75598213	+;+;+;+	797	9.4628	6.25773	2.98931	6.23661	1.97934	1.85267	3.01036	2.28079	-1.45123	0.0349701	0.580439	1411	0
Rasgrf2	chr13;chr13;chr13;chr13;chr13;chr13;chr13;chr13;chr13;chr13;chr13;chr13;chr13;chr13;chr13	91880407;91885613;91886352;91887632;91890519;91893706;91896009;91896364;91902519;91919828;91968947;91972181;91982594;91983453;91987957	91884524;91885681;91886469;91887711;91890716;91893790;91896112;91896424;91902631;91919931;91969036;91972285;91982856;91983701;91988042	-;-;-;-;-;-;-;-;-;-;-;-;-;-;-	5843	15.7713	11.4725	6.97506	11.4063	5.93802	2.77901	8.02762	5.58155	-1.03109	0.0356107	0.584444	1427	0
Slc52a3	chr2;chr2;chr2;chr2;chr2;chr2	151996511;151999866;152004052;152005532;152007481;152007946	151996651;151999938;152004678;152006019;152007604;152009258	+;+;+;+;+;+	2766	4.20569	6.25772H63:H816545	1.99288	4.1521	0.98967	0.926337	1.00345	0.973153	-2.0931	0.0385458	0.610373	1479	0
Scn2a1	chr2;chr2;chr2;chr2;chr2;chr2;chr2;chr2;chr2;chr2;chr2;chr2;chr2;chr2;chr2;chr2;chr2;chr2;chr2;chr2;chr2;chr2;chr2;chr2;chr2;chr2	65670445;65671602;65680998;65681997;65682503;65683671;65686784;65688318;65688608;65690045;65701717;65707228;65711707;65713668;65715660;65717388;65726328;65728386;65730106;65733229;65735609;65743065;65748294;65748772;65751864;65763634	65670762;65671720;65681087;65682125;65682594;65683943;65686847;65688459;65688814;65690332;65702064;65707360;65711945;65713841;65716016;65717867;65726448;65728540;65730279;65733351;65735890;65743118;65748431;65748876;65752134;65767447	+;+;+;+;+;+;+;+;+;+;+;+;+;+;+;+;+;+;+;+;+;+;+;+;+;+	8690	8.41138	9.38659	4.98219	7.59339	3.95868	3.70535	2.0069	3.22364	-1.23605	0.0392921	0.61745	1490	0
Tmem179	chr12;chr12;chr12;chr12	112500184;112503242;112504534;112510744	112501922;112503320;112504671;112511160	-;-;-;-	2373	2.10285	4.17182	1.99288	2.75585	0.98967	0	0	0.32989	-3.06244	0.0408124	0.62926	1518	0
Rxfp3	chr15	11033717	11037968	-	4252	2.10285	4.17182	1.99288	2.75585	0	0	1.00345	0.334484	-3.04249	0.040817	0.62926	1519	0
Syp	chrX;chrX;chrX;chrX;chrX;chrX;chrX	7638580;7639858;7641097;7644101;7645008;7648557;7651837	7638728;7639923;7641221;7644299;7645199;7648887;7653256	+;+;+;+;+;+;+	2482	2.10285	2.08591	5.97863	3.38913	0	0.926337	1.00345	0.643263	-2.39743	0.0428681	0.646043	1554	0
Acrbp	chr6;chr6;chr6;chr6;chr6;chr6;chr6;chr6;chr6;chr6	125049927;125050434;125050847;125051243;125053490;125054673;125060810;125061086;125062436;125062936	125050052;125050649;125050941;125051360;125054193;125054805;125060989;125061253;125062519;125063265	+;+;+;+;+;+;+;+;+;+	2154	3.15427	9.38659	4.98219	5.84102	3.95868	0.926337	1.00345	1.96282	-1.57329	0.043242	0.649601	1559	0
Cyp2e1	chr7;chr7;chr7;chr7;chr7;chr7;chr7;chr7;chr7	140763832;140764800;140769096;140769564;140770052;140770942;140773019;140773630;140774558	140764027;140764959;140769245;140769724;140770228;140771083;140773206;140773771;140774977	+;+;+;+;+;+;+;+;+	1736	5.25711	2.08591	0.996438	2.77982	0	0.926337	0	0.308779	-3.17034	0.0440194	0.653806	1576	0
Bend7	chr2;chr2;chr2;chr2;chr2;chr2;chr2;chr2;chr2	4717831;4720481;4744219;4749536;4752720;4763078;4788456;4796530;4799954	4718292;4720564;4744521;4749658;4752991;4763303;4788575;4796583;4802146	+;+;+;+;+;+;+;+;+	3837	5.25711	6.25773	3.98575	5.16686	0.98967	0.926337	3.01036	1.64212	-1.65373	0.0440314	0.653806	1577	0
2610307P16Rik	chr13;chr13;chr13;chr13;chr13;chr13;chr13;chr13;chr13;chr13	28460034;28505706;28561441;28608518;28668370;28669782;28711117;28772619;28883315;28885144	28461061;28505913;28561579;28608628;28668704;28669994;28711208;28772666;28883577;28885422	-;-;-;-;-;-;-;-;-;-	2716	6.30854	1.04295	2.98931	3.44693	0	1.85267	0	0.617558	-2.48067	0.0464993	0.671816	1621	0
Fam83f	chr15;chr15;chr15;chr15;chr15	80671847;80689917;80690533;80691911;80698950	80672387;80690084;80690654;80692596;80700425	+;+;+;+;+	2993	5.25711	5.21477	7.9715	6.1478	1.97934	3.70535	1.00345	2.22938	-1.46343	0.0469631	0.675258	1627	0
Musk	chr4;chr4;chr4;chr4;chr4;chr4;chr4;chr4;chr4;chr4;chr4;chr4;chr4;chr4;chr4;chr4	58285962;58293492;58296608;58301602;58303845;58327326;58333565;58344152;58347808;58353942;58355681;58356482;58366798;58367397;58368873;58373031	58286190;58293618;58296759;58301729;58303986;58327355;58333689;58344316;58347859;58354207;58356093;58356505;58366996;58367588;58369021;58374303	+;+;+;+;+;+;+;+;+;+;+;+;+;+;+;+	3666	8.41138	16.6873	6.97506	10.6912	4.94835	2.77901	8.02762	5.25166	-1.02558	0.0485234	0.687488	1653	0

## Sheet: RNAseq-DOWN_KEGG
Down-regulated gene_KEGG pathway (Pvalue<0.05)
Category	Term	Count	%	PValue	Genes	List Total	Pop Hits	Pop Total	Fold Enrichment	Bonferroni	Benjamini	FDR
KEGG_PATHWAY	mmu04514:Cell adhesion molecules (CAMs)	4	4.81928	0.0224445	CDH15, PECAM1, H2-EB1, CLDN5	30	162	7691	6.33004	0.854782	0.854782	21.6689

## Sheet: RNAseq-DOWN_GObp
Down-regulated gene_GO biological process (Pvalue<0.05)
Category	Term	Count	%	PValue	Genes	List Total	Pop Hits	Pop Total	Fold Enrichment	Bonferroni	Benjamini	FDR
GOTERM_BP_DIRECT	GO:0001525~angiogenesis	5	6.0241	0.00912213	DLL4, PTPRB, NOS3, GJA5, PECAM1	63	239	18082	6.00452	0.996161	1	1
GOTERM_BP_DIRECT	GO:0086067~AV node cell to bundle of His cell communication	2	2.40964	0.0102518	GJA5, SCN5A	63	3	18082	191.344	0.998079	1	1
GOTERM_BP_DIRECT	GO:0003158~endothelium development	2	2.40964	0.0170288	GJA5, SLC40A1	63	5	18082	114.806	0.99997	1	1
GOTERM_BP_DIRECT	GO:0086015~SA node cell action potential	2	2.40964	0.0204002	GJA5, SCN5A	63	6	18082	95.672	0.999996	1	1
GOTERM_BP_DIRECT	GO:0060373~regulation of ventricular cardiac muscle cell membrane depolarization	2	2.40964	0.0237602	GJA5, SCN5A	63	7	18082	82.0045	1	1	1
GOTERM_BP_DIRECT	GO:0060371~regulation of atrial cardiac muscle cell membrane depolarization	2	2.40964	0.0271088	GJA5, SCN5A	63	8	18082	71.754	1	1	1
GOTERM_BP_DIRECT	GO:0035865~cellular response to potassium ion	2	2.40964	0.0271088	NPTX1, PPARGC1A	63	8	18082	71.754	1	1	1
GOTERM_BP_DIRECT	GO:0032464~positive regulation of protein homooligomerization	2	2.40964	0.0304462	BIK, BMF	63	9	18082	63.7813	1	1	1
GOTERM_BP_DIRECT	GO:0086005~ventricular cardiac muscle cell action potential	2	2.40964	0.0436833	GJA5, SCN5A	63	13	18082	44.1563	1	1	1
GOTERM_BP_DIRECT	GO:0060307~regulation of ventricular cardiac muscle cell membrane repolarization	2	2.40964	0.0469647	GJA5, SCN5A	63	14	18082	41.0023	1	1	1
GOTERM_BP_DIRECT	GO:0006811~ion transport	6	7.22892	0.0496032	CNNM1, SLC26A1, KCNC3, SLC40A1, KCNQ4, SCN5A	63	584	18082	2.94879	1	1	1

## Sheet: RNAseq_DOWN+MBDseq_Body
Down-regulated gene+Methylated peaks in gene body
OFFICIAL_GENE_SYMBOL	Name
2610307P16Rik	RIKEN cDNA 2610307P16 gene(2610307P16Rik)
8430408G22Rik	RIKEN cDNA 8430408G22 gene(8430408G22Rik)
Acrbp	proacrosin binding protein(Acrbp)
Adamts8	a disintegrin-like and metallopeptidase (reprolysin type) with thrombospondin type 1 motif, 8(Adamts8)
Adamtsl2	ADAMTS-like 2(Adamtsl2)
Apba2	amyloid beta (A4) precursor protein-binding, family A, member 2(Apba2)
Arap3	ArfGAP with RhoGAP domain, ankyrin repeat and PH domain 3(Arap3)
Bcam	basal cell adhesion molecule(Bcam)
Bend7	BEN domain containing 7(Bend7)
Bik	BCL2-interacting killer(Bik)
Cnnm1	cyclin M1(Cnnm1)
Col13a1	collagen, type XIII, alpha 1(Col13a1)
Dcp1b	decapping mRNA 1B(Dcp1b)
Efhd1	EF hand domain containing 1(Efhd1)
Erg	avian erythroblastosis virus E-26 (v-ets) oncogene related(Erg)
Hid1	HID1 domain containing(Hid1)
Htr2b	5-hydroxytryptamine (serotonin) receptor 2B(Htr2b)
Igflr1	IGF-like family receptor 1(Igflr1)
Lace1	lactation elevated 1(Lace1)
Musk	muscle, skeletal, receptor tyrosine kinase(Musk)
Nova2	neuro-oncological ventral antigen 2(Nova2)
Oacyl	O-acyltransferase like(Oacyl)
Pecam1	platelet/endothelial cell adhesion molecule 1(Pecam1)
Ppargc1a	peroxisome proliferative activated receptor, gamma, coactivator 1 alpha(Ppargc1a)
Prdm16	PR domain containing 16(Prdm16)
Ptprb	protein tyrosine phosphatase, receptor type, B(Ptprb)
Rasgrf2	RAS protein-specific guanine nucleotide-releasing factor 2(Rasgrf2)
Scn2a1	sodium channel, voltage-gated, type Ⅱ, alpha 1(Scn2a1)
Scn5a	sodium channel, voltage-gated, type V, alpha(Scn5a)
Slc40a1	solute carrier family 40 (iron-regulated transporter), member 1(Slc40a1)
Slc52a3	solute carrier protein family 52, member 3(Slc52a3)
Sox10	SRY (sex determining region Y)-box 10(Sox10)
St8sia4	ST8 alpha-N-acetyl-neuraminide alpha-2,8-sialyltransferase 4(St8sia4)
Stap2	signal transducing adaptor family member 2(Stap2)
Stc2	stanniocalcin 2(Stc2)
Syp	synaptophysin(Syp)
Tmem117	transmembrane protein 117(Tmem117)
Uhrf1	ubiquitin-like, containing PHD and RING finger domains, 1(Uhrf1)
Zfp286	zinc finger protein 286(Zfp286)

[truncated: 2 more sheets: RNAseq-DOWN+MBDseq-Body_KEGG, RNAseq_DOWN+MBDseq_Body_GObp]
